# Supplementary material for: Unlocking the efficiency of nonaqueous Li–air batteries through the synergistic effect of dual metal site catalysts: an interpretable machine learning approach
Source: Royal Society of Chemistry journal article supplement (doi:10.1039/d4ta01312c), 2024-01-01
Supplement: d4ta01312c1.pdf [file d4ta01312c1.pdf]

## Supporting Information

### Unlocking Efficiency of Nonaqueous Li-Air Batteries through Synergistic Effect of Dual Metal Site Catalysts: An Interpretable Machine Learning Approach

Nishchal Bharadwaj,<sup>a</sup> Surya Sekhar Manna,<sup>a</sup> Milan Kumar Jena,<sup>a</sup> Diptendu Roy,<sup>a</sup> and Biswarup Pathak<sup>a\*</sup>

<sup>a</sup>Department of Chemistry, Indian Institute of Technology (IIT) Indore, Indore, Madhya Pradesh, 453552, India

\*E-mail: [biswarup@iiti.ac.in](mailto:biswarup@iiti.ac.in)

### Content

**Text S1.** Details of density functional theory (DFT) calculations

**Text S2.** Details of considered machine learning algorithms.

**Figure S1.** The optimized structures of possible sites of DMSCs for LiO<sub>2</sub> adsorption

**Figure S2.** The optimized structures of some representative DMSCs

**Figure S3.** Optimized structures of DMSCs consisting of Zr and Hf elements

**Text S3.** Calculation of the number of possible combinations within DMSCs

**Table S1.** Optimized set of features corresponding to lowest MAE

**Table S2.** The optimized hyperparameter values and their corresponding mean absolute error (MAE) scores for seven machine learning regression models in the considered dataset

**Figure S4.** Correlation matrix analysis of all features and target (adsorption energy) for the considered data set

**Figure S5.** Bar plots representing train and test errors for all the considered models

**Figure S6.** SHAP waterfall plot visualizing the contribution direction of the individual feature for the most deviated system of Sc<sup>\*</sup>-Sc based DMSC

**Text S4.** Calculation of the LiO<sub>2</sub> solvation energy within an explicit DMSO environment

**Figure S7.** Optimized structures of (a) LiO<sub>2</sub> with explicit DMSO solvent, (b) DMSO solvent without LiO<sub>2</sub>

**Text S5.** Calculation of the charge density difference plots for LiO<sub>2</sub> adsorbed DMSCs

**Figure S8.** Charge density difference plots of LiO<sub>2</sub> adsorbed on (a) Pd<sup>\*</sup>-Ru DMSC and (b) Cu<sup>\*</sup>-Ni DMSC

## **Text S6. Coordinates of the structures considered in this study**

### **Text S1. Details of density functional theory (DFT) calculations**

All spin-polarized DFT computations are carried out using the Vienna Ab initio Simulation Package (VASP)<sup>1</sup> with the implementation of the projector-augmented wave (PAW) method.<sup>2</sup> The generalized gradient approximation of Perdew–Burke–Ernzerhof (GGA-PBE)<sup>3</sup> is used to describe the exchange–correlation potential. Electronic wave functions are expanded by plane-wave basis sets with a kinetic energy cut off of 450 eV. All the DMSCs have been optimized in cubic box of 30 x 30 x 30 Å<sup>3</sup> by maintaining a minimum distance of 10 Å between the periodic images to rule out their interactions. Gamma centered (1 x 1 x 1) k-point grid is considered for Brillouin zone sampling. The convergence criterion of 10<sup>-4</sup> eV and < 0.02 eVÅ<sup>-1</sup> are employed for energy and atomic forces, respectively during the optimization of DMSCs. All the calculation parameters such as k-point grid, energy cutoff are verified for their convergence. The DFT-D3 method is used to take into account the van der Waals interactions.<sup>4</sup> Further, to investigate the charge transfer processes, a Bader charge analysis has been performed.<sup>5</sup>

The adsorption energy of the intermediate is calculated by using the following equation,

$$E_{ads} = E_{DMSC + LiO_2} - (E_{DMSC} + E_{LiO_2})$$

where,  $E_{DMSC + LiO_2}$  is the total optimized energy of DMSC with adsorbed LiO<sub>2</sub>.  $E_{DMSC}$  and  $E_{LiO_2}$  are the single-point energies of DMSC and LiO<sub>2</sub>, respectively.

### **Text S2. Details of considered machine learning algorithms.**

### **XGBR Algorithm**

XGBoost regression (XGBR) is a supervised learning method tailored for forecasting continuous numeric outcomes. Given a training set of  $N$  instances, each with  $M$  input features  $(x_1, x_2, \dots, x_M)$ , and a corresponding numeric output  $y$ , XGBR seeks to learn a predictive function  $F(x)$  capable of accurately foretelling  $y$  for new inputs. In XGBR,  $F(x)$  is shaped by combining  $T$  distinct decision trees. These trees, contributing individual predictions  $f_t(x)$  for an input, coalesce into the final prediction through a weighted summation process,

$$F(x) = \sum_{t=1}^T f_t(x)$$

XGBR aims to identify the ideal set of decision trees  $\{f_t\}$  that minimizes the loss function  $L(y, F(x))$  without succumbing to overfitting. This is accomplished through a gradient-based optimization approach, progressively introducing new trees that diminish the difference between the true output and the current prediction. The optimization objective is framed as follows,

$$Obj(\Theta) = L(y, F(x)) + \Omega(\Theta)$$

In each iteration of XGBR, the aim is to discover the optimal model parameters  $\Theta$  by minimizing the loss function  $L(y, F(x))$  while considering model complexity through  $\Omega(\Theta)$ . Through successive steps, XGBR calculates the negative gradient of the loss concerning the current prediction, leveraging it as the next tree's target. The new tree is incorporated into the ensemble by determining the best split point, maximizing the reduction in the objective function.

In essence, XGBR stands as a potent and adaptable algorithm, effectively applicable across diverse regression scenarios, showcasing exceptional performance on benchmark datasets and attaining leading-edge outcomes.

### **ADR Algorithm**

AdaBoost regression (ADR) amalgamates multiple weak learners to construct a robust predictor.

This mathematical concept can be elucidated through the subsequent key points:

1. At the outset, initialize the weight of each training sample as  $w_i = 1/N$ , where  $N$  is the total number of training samples.
2. For each iteration  $t= 1,2, 3,\dots,T$ 
  - a. Train a weak learner on the training data with the current weights.
  - b. Calculate the error of the weak learner ( $\epsilon_t$ ),

$$\epsilon_t = \frac{\sum (w_i * |(y_i - f_t(x_i))|)}{\sum w_i}$$

Where,  $y_i$  is the target value for the  $i^{\text{th}}$  training sample,  $f_t(x_i)$  is the prediction of the weak learner for the  $i^{\text{th}}$  sample, and  $\sum w_i$  is the sum of weights over all training samples.

- a. Further, calculate the weight of the weak learner ( $\alpha_t$ ),

$$\alpha_t = \ln \left( \frac{1 - \epsilon_t}{\epsilon_t} \right)$$

- b. Instantly, update the previous training sample ( $w_i$ ),

$$w_i = w_i * e^{\alpha_t |(y_i - f_t(x_i))|}$$

1. The ultimate predictor materializes as the weighted fusion of the weak learners, with the weight of each learner being directly linked to its alpha value.

## **KRR Algorithm**

Kernel ridge regression (KRR) stands as a valuable supervised learning technique designed primarily for regression tasks. While bearing resemblance to the conventional ridge regression approach, KRR distinguishes itself through the incorporation of a non-linear transformation applied to the input data. This transformation occurs within an augmented dimensional realm referred to as the feature space, all facilitated by the utilization of a kernel function. The essence of this transformation lies in its capability to facilitate the capture of intricate and nuanced connections that may exist between the input variables and the target variable. In essence, KRR harnesses the power of kernel functions to elevate its regression capabilities beyond linear constraints, enabling it to navigate and model intricate relationships within the data.

KRR consists of the goal to find a function  $f(x)$  that maps the input variables  $x$  to the target variable  $y$ , given a set of training data  $(x_i, y_i)$ , where  $i = 1, 2, \dots, n$ . The function  $f(x)$  is a linear combination of the kernel functions  $K(x, x')$  evaluated at the training data points  $x_i$ ,

$$f(x) = \sum_{i=1}^n \alpha_i * K(x, x_i)$$

Here,  $\alpha_i$  are the coefficients of the linear combination.

In kernel ridge regression (KRR), the kernel function's selection holds significance, as it dictates the non-linear conversion of input data to a higher-dimensional feature space. Typical kernels encompass the linear, polynomial, radial basis function (RBF), and sigmoid types. In essence, KRR is a potent method, leveraging kernel functions to map data to an elevated dimensional realm, enabling the capture of intricate associations between input and target variables.

## **GBR Algorithm**

Gradient boosted regression (GBR) emerges as a comprehensive ML model, resulting from the fusion of weak regression trees. In the presence of training samples  $D = \{(x_1, y_1), (x_2, y_2), \dots, (x_n, y_n)\}$ , each regression tree  $t_m(x)$  is characterized by  $J$  leaf nodes, defining  $J$  distinct regions within the input data. The training objective of GBR revolves around minimizing the loss function  $L$ , shaping decision tree parameters  $\theta_m$  via empirical risk minimization.

$$\theta_m = \sum_{i=1}^n L(y_i f_{(m-1)}(x_i) + t_m(x_i))$$

The process of GBR training is as follows:

- (a) At the outset, the Initialization of a regression tree function  $f_0(x)$ .
- (b) Train GBR in the gradient decline direction and compute the negative gradient value of the loss function as the estimated value of the residual. For the  $m^{\text{th}}$  iteration, GBR generates a regression tree according to the residual and updates the current function  $f_m(x)$ .
- (c) The final regression model is the weighted sum of several weak regression trees, which is defined as:

$$f_M(x) = \sum_{m=1}^M t(x, \theta_m)$$

### **ETR and RFR Algorithms**

The extra tree regression (ETR) technique evolved from the original random forest (RF) model. In ETR's conventional top-down strategy, a set of unpruned decision or regression trees is built. In random forest regression (RFR), the process entails two phases: bootstrapping and bagging. Bootstrapping yields a collection of trees, each grown with a random training dataset sample. The

subsequent bagging step further refines tree nodes through multiple random subsets of the training data.

For RFR's decision-making, optimal subsets and their values are selected iteratively. The approach incorporates a sequence of decision trees, denoted as predicting trees. An independent distribution vector is denoted as is assigned before each tree's growth. All trees amalgamate into an ensemble (forest), with their outputs averaged according to a specific equation.

$$G(x, \theta_1, \dots, \theta_r) = \frac{1}{R} \sum_{r=1}^R G(x, \theta_r)$$

There are differences between ETR and RFR such as,

1. In ETR, all the cutting points are employed for node division, with nodes being split through random selection from these points.
2. It uses the entire learning samples to cultivate the trees to minimize bias.

### **DTR Algorithm**

Decision tree regression (DTR) operates by iteratively segmenting the feature space into distinct regions and fitting uncomplicated models (often constants) within each region. The outcome of a decision tree regression is expressed by the subsequent equation:

$$y = \sum C_i * I(x \in R_i)$$

where  $y$  is the predicted output value,  $C_i$  is the constant value for region  $i$ , and  $I(x \in R_i)$  is an indicator function that returns 1 if the input  $x$  belongs to region  $i$ , and 0 otherwise. The regions  $R_i$  Here  $y$  is the predicted output value,  $C_i$  is the constant value for region  $i$ , and  $I(x \in R_i)$  is an indicator function that returns 1 if the input  $x$  belongs to region  $i$ , and 0 otherwise. The region  $R_i$  is defined by the splits in the decision tree, which are based on the values of the input features.

The objective of the decision tree regression algorithm is to identify optimal splits that minimize the mean squared error between predicted values and actual values within the training dataset.

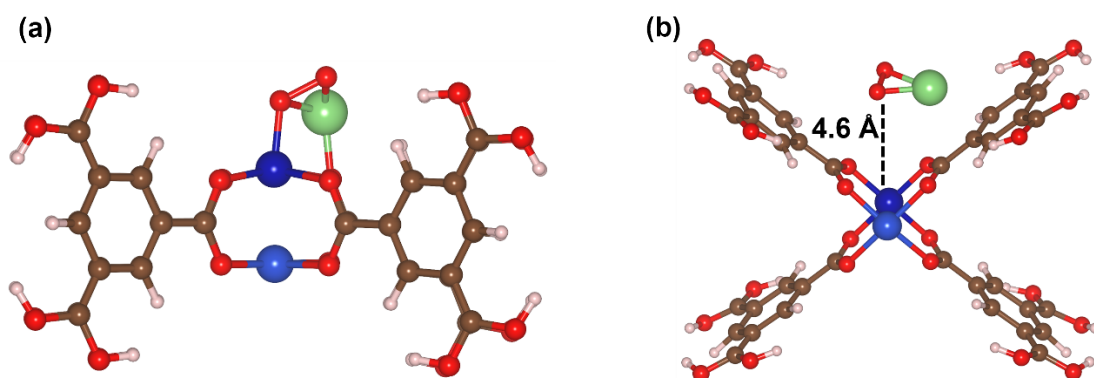

**Figure S1.** The optimized structures of possible sites of DMSCs for  $\text{LiO}_2$  adsorption. (a) Top site and (b) bridge site.



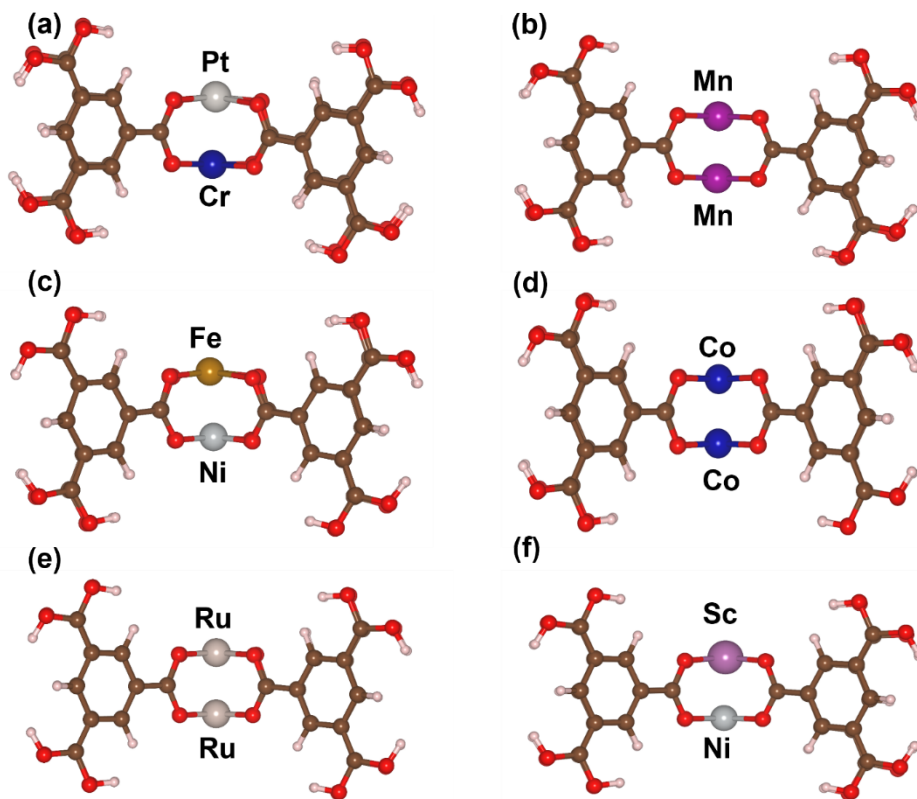

**Figure S2.** The optimized structures of some representative DMSCs. Here, brown, red, and pink colors represent C, O, and H atoms, respectively.

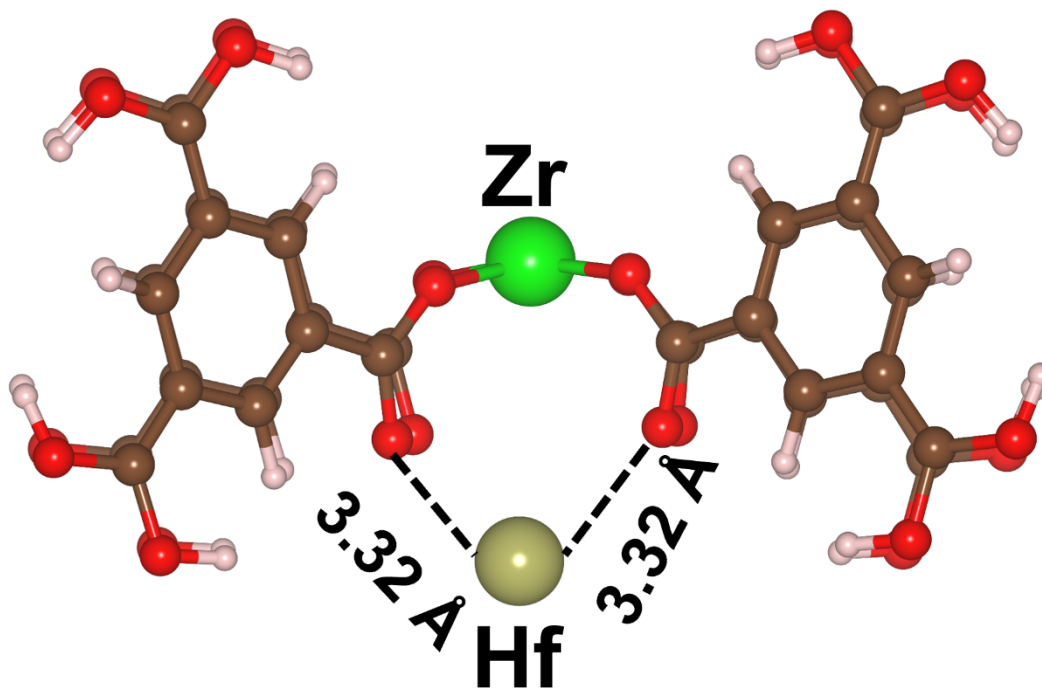

**Figure S3.** The optimized structures of DMSCs consist of Zr and Hf elements. The Dotted line shows a weak interaction of the BTC ligand with Hf.

### Text S3. Calculation of the number of possible combinations within DMSCs

The calculation of the number of possible metal combinations within DMSCs for all the considered transition metal:

$$n_{Cr} = \frac{n!}{r! * (n - r)!}$$

Total number of considered transition metal = 26,

$$\text{Hence, total heteronuclear combinations for two metal sets} = {}^{26}C_2 = \frac{26 * 25 * 24!}{2! * 24!} = 325$$

Since both metals can act as active sites, the total adsorption sites = 2 x 325 = 650

Total homonuclear metal combinations for DMSCs = 26

Therefore, the total number of possible combinations: 650+26=676

**Table S1.** Optimized Set of Features Corresponding to Lowest MAE

|                 |                                                                                                                                                                                                                                                                                                                                                                                                                                                                                                                      |
|-----------------|----------------------------------------------------------------------------------------------------------------------------------------------------------------------------------------------------------------------------------------------------------------------------------------------------------------------------------------------------------------------------------------------------------------------------------------------------------------------------------------------------------------------|
| <b>Features</b> | $N_{d1}, \aleph_{P1}, \aleph_{P2}, \aleph_{M1}, N_{d1} + N_{d2}, N_{d1} - N_{d2}, N_{d1} \times \aleph_{P1},$<br>$\aleph_{P1} \times \aleph_{P2}, \aleph_{M1} \times \aleph_{M2}, N_{d1} \times \aleph_{M2}, N_{d1} \times \aleph_{M1}, \aleph_{P1} - \aleph_{P2},$<br>$\aleph_{M1} - \aleph_{M2}, \text{avg. atomic radius in } \text{\AA} (\bar{r}_a), \text{ avg. ionic radius in } \text{\AA}$<br>$(\bar{r}_i), \text{ avg. crystal radius in } \text{\AA} (\bar{r}_c), \text{ avg. Mulliken electronegativity}$ |
|-----------------|----------------------------------------------------------------------------------------------------------------------------------------------------------------------------------------------------------------------------------------------------------------------------------------------------------------------------------------------------------------------------------------------------------------------------------------------------------------------------------------------------------------------|

|  |               |
|--|---------------|
|  | $(\bar{N}_M)$ |
|--|---------------|

**Table S2.** The Details of Optimized Hyperparameter Values and Their Corresponding Train-Test Mean Absolute Error (MAE) Scores for Considered Seven Machine Learning Regression Models

| Sl. No. | Models | Hyperparameters                                                                                             | Train MAE (eV) | Test MAE (eV) |
|---------|--------|-------------------------------------------------------------------------------------------------------------|----------------|---------------|
| 1       | XGBR   | cv=3, learning_rate=0.05, max_depth=25, min_child_weight=2, n_estimators=100, objective='reg:squared error' | 0.04           | 0.13          |
| 2       | ADR    | learning_rate=0.1, loss='exponential', n_estimators=1400                                                    | 0.10           | 0.14          |
| 3       | KRR    | alpha=0.01, coef0=4, gamma=0.001, kernel='laplacian'                                                        | 0.11           | 0.13          |
| 4       | GBR    | alpha=0.08, max_depth=10, learning_rate=0.06, n_estimators=200, verbose=40, min_samples_leaf=10             | 0.09           | 0.13          |
| 5       | ETR    | max_depth=4, max_features=13, max_leaf_nodes=15, min_samples_leaf=4, min_samples_split=4                    | 0.16           | 0.14          |
| 6       | DTR    | max_depth=7, max_features='auto', min_samples_leaf=8, min_weight_fraction_leaf=0.1, splitter='random'       | 0.18           | 0.14          |
| 7       | RFR    | max_depth=20, min_samples_leaf=5, min_samples_split=3, n_estimators=200                                     | 0.11           | 0.17          |

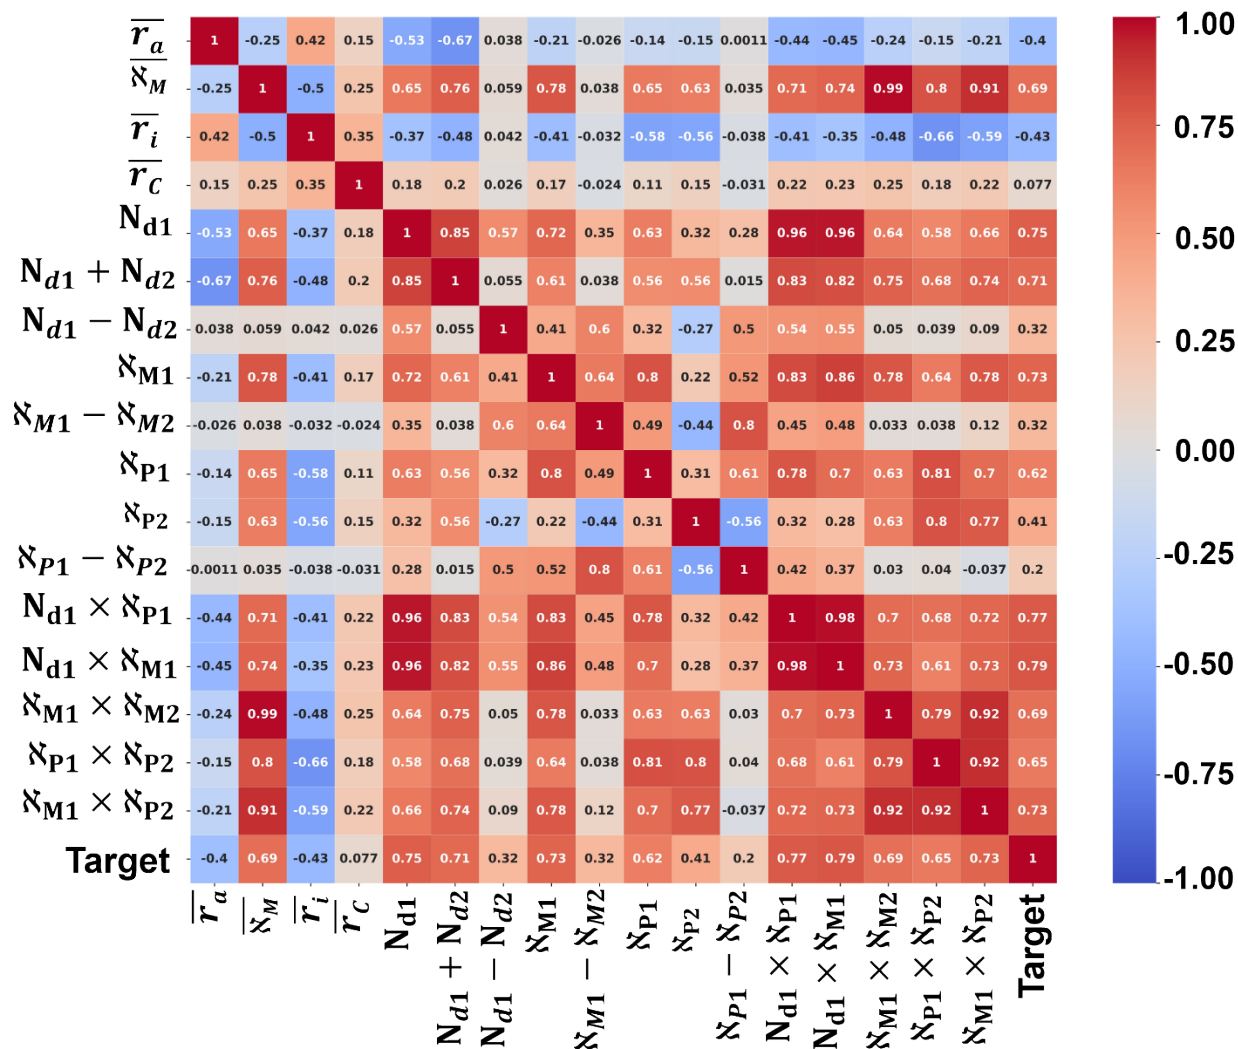

**Figure S4.** Pearson's correlation coefficient (PCC) analysis between final set of features and the target variable (adsorption energy). The color scale on the right side indicates the correlation strength, with dark red indicating a strong positive correlation and dark blue representing a strong negative correlation.

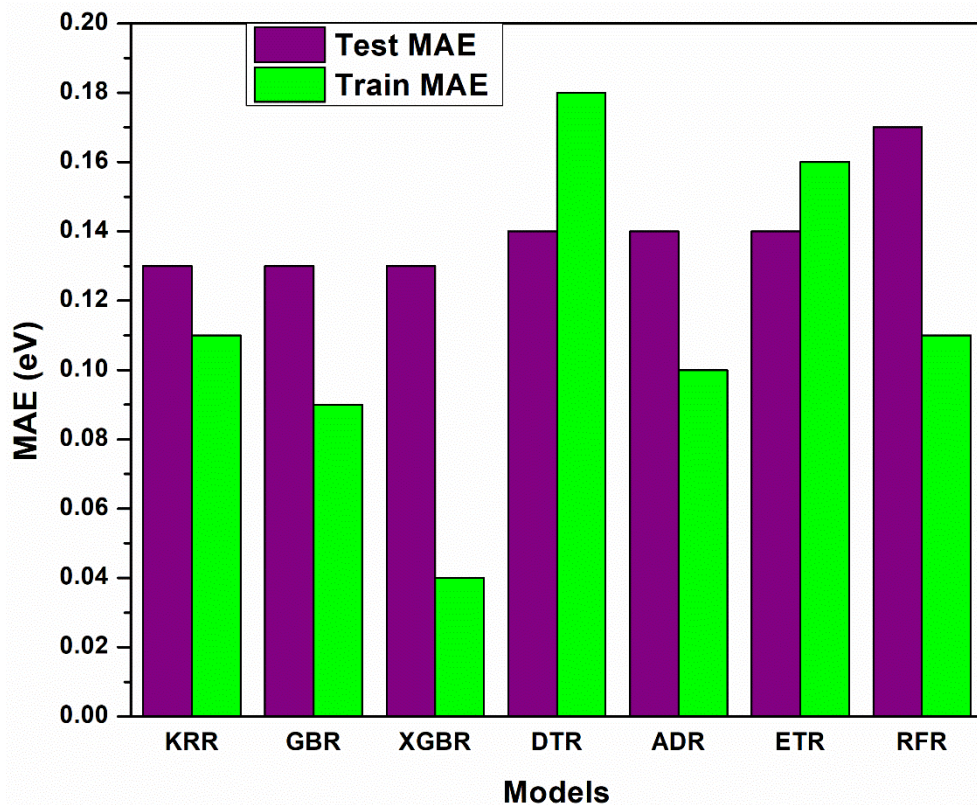

Figure S5. Bar plots representing train and test errors for all the considered models.

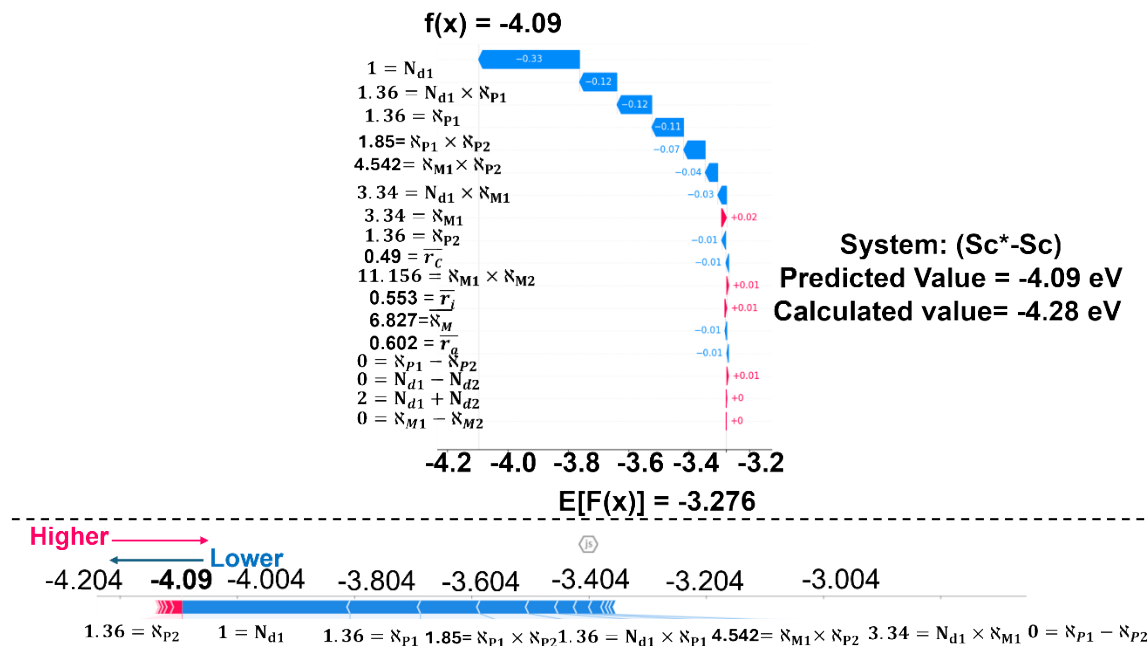

**Figure S6.** SHAP waterfall plot visualizing the contribution direction of the individual feature for the most deviated system of Sc<sup>\*</sup>-Sc based DMSC.

### **Text S4. Calculation of the LiO<sub>2</sub> solvation energy within an explicit DMSO environment**

The solvation energy of LiO<sub>2</sub> is calculated as follows,

$$\text{Solvation energy} = E_{DMSO\_LiO_2} - E_{DMSO} - E_{LiO_2}$$

where,  $E_{DMSO\_LiO_2}$ , and  $E_{DMSO}$  are the total energy of LiO<sub>2</sub> with explicit DMSO solvent and bulk DMSO solvent system without LiO<sub>2</sub> molecule, respectively.  $E_{LiO_2}$  is the total energy of an isolated LiO<sub>2</sub> molecule.

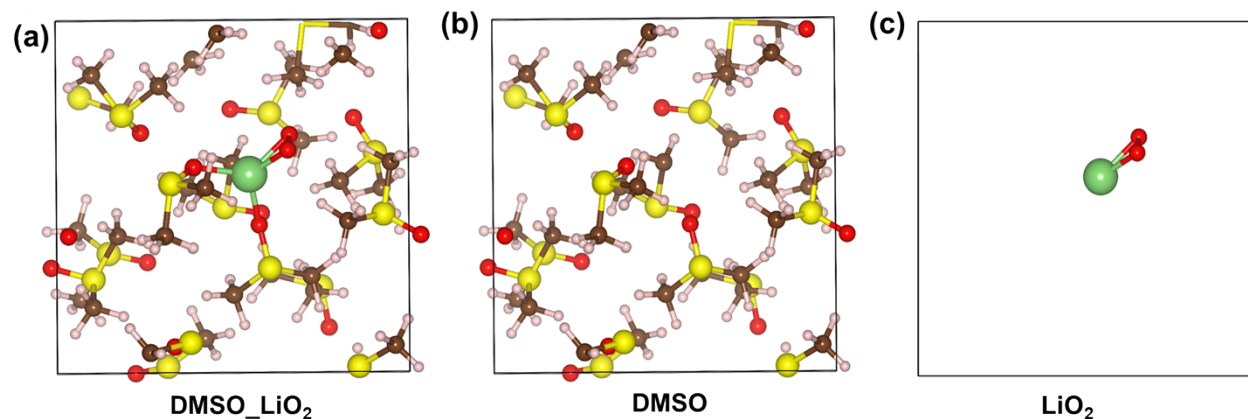

**Figure S7.** Optimized structures of (a) LiO<sub>2</sub> with explicit DMSO solvent, (b) DMSO solvent without LiO<sub>2</sub>, and (c) isolated LiO<sub>2</sub> molecule. Green, red, yellow brown, and pink color represent the lithium, oxygen, sulfur, carbon, and hydrogen atoms, respectively.

### **Text S5. Calculation of the charge density difference plots for LiO<sub>2</sub> adsorbed DMSCs**

The charge density difference is calculated as follows,

$$\Delta\rho = \rho_{LiO_2\_DMSC} - \rho_{DMSC} - \rho_{LiO_2}$$

Here,  $\rho_{LiO_2-DMSC}$ ,  $\rho_{DMSC}$ , and  $\rho_{LiO_2}$  are the total charge densities of the  $LiO_2-DMSC$ , DMSC without  $LiO_2$ , and isolated  $LiO_2$  molecule, respectively.

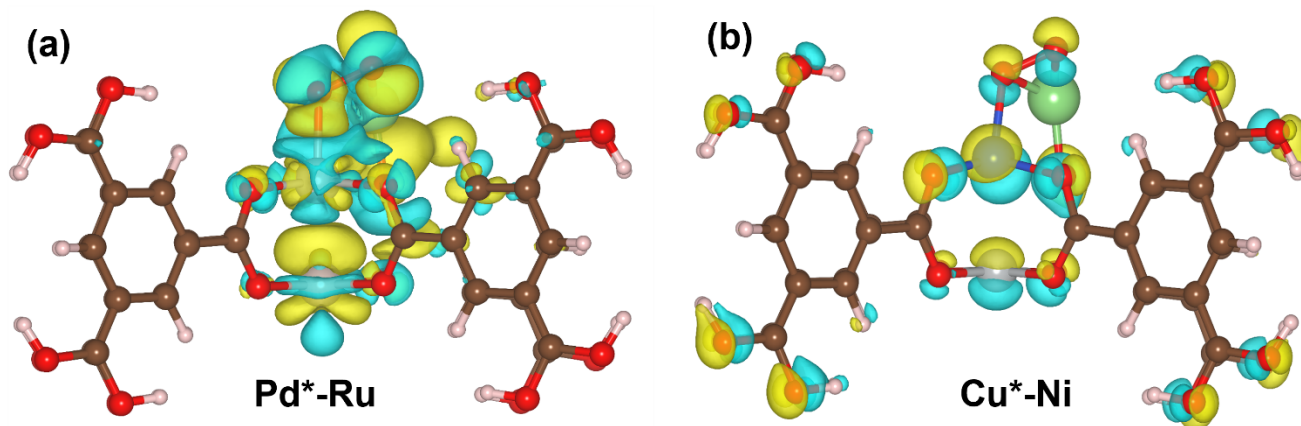

**Figure S8.** The charge density difference plots of  $LiO_2$  adsorbed on (a)  $Pd^*-Ru$  DMSC (isosurface =  $0.007 \text{ eV/\AA}^3$ ) and (b)  $Cu^*-Ni$  DMSC (isosurface =  $0.08 \text{ eV/\AA}^3$ ). The yellow and cyan colors indicate electron density accumulation and depletion, respectively.

**Text S6.** Coordinates of the structures considered in this study.

**Ru\*-Ru DMSC**

```
1.0000000000000000
30.0000000000000000 0.0000000000000000 0.0000000000000000
0.0000000000000000 30.0000000000000000 0.0000000000000000
0.0000000000000000 0.0000000000000000 30.0000000000000000
```

```
Ru O C Li H
2 26 36 1 28
```

Direct

```
0.5060486593742873 0.5113605602704696 0.5395180491948578
0.4916202571133489 0.4906863027377561 0.4673944663211720
0.3271455209720276 0.4729422654465951 0.6765834845086017
0.2806944855047552 0.4025022917432954 0.4457699409363107
0.3776575525633112 0.6516536424568466 0.3510802356377675
0.4243826414542920 0.7225092718960235 0.5817463047184429
0.2249921679831304 0.4095935796975348 0.4934920186726200
0.4772532359597307 0.5728475751381161 0.5262315341640774
```

0.4444420056714231 0.4884490205232035 0.5578142917316972  
0.3413755431769286 0.7090929174497658 0.3796100769904478  
0.3752605800411738 0.7597614076612560 0.5415773543110556  
0.4301639479202177 0.4681151162075718 0.4863686090042272  
0.4629958615881697 0.5513595707653899 0.4552143277648775  
0.2581260813597877 0.4576474435303503 0.6564211633154857  
0.5694899573154831 0.5355896356313660 0.5178005355471076  
0.5355121951571467 0.4497764962540617 0.5491266209623150  
0.5194149148638715 0.4294394671108020 0.4781359439513740  
0.5532956767881140 0.5129909643779813 0.4479673950974450  
0.7333963705034068 0.5368767043925424 0.3390476223630529  
0.7252691558314324 0.5997466267434989 0.5485560297320653  
0.7777749464537806 0.5877624248959287 0.4982368031844926  
0.5722397596298845 0.2848527218699544 0.4155983435125901  
0.6235533495487261 0.2464644014015526 0.4519988198417062  
0.6582380582120748 0.2877444148334589 0.6163873738229714  
0.6227184445839568 0.3433699621417346 0.6488409618513061  
0.6624768712131928 0.5251980563957536 0.3231200617390263  
0.5617013820784515 0.5204134051025523 0.6238374316770096  
0.5205030766288138 0.5267954488661577 0.6026703596087177  
0.3006519534782273 0.4615569734934762 0.6421492495819027  
0.2693365363567995 0.4149617217092639 0.4874906638365045  
0.3710683564218667 0.6763058112347878 0.3881423976820816  
0.4026045141006475 0.7239825755043114 0.5424242642631171  
0.4603513927013337 0.5795355296474658 0.4873861359739813  
0.4186633724576337 0.4727494862023860 0.5274195930396858  
0.3589968923905444 0.4660866410535801 0.5846784125512098  
0.3435806375142630 0.4428900225923476 0.5083243375310120  
0.4164374432486531 0.6293862445583221 0.4376839855221800  
0.4317425168396302 0.6527586326442399 0.5140345656100335  
0.2849139370749523 0.4368856194812181 0.5652365643651891  
0.3876554229009223 0.7012171169334606 0.4647716646025061  
0.3146087307566963 0.4549014981627437 0.5978578651951734  
0.2988687434752497 0.4313309528565272 0.5200359179784592  
0.3915005261077107 0.6691518569761444 0.4297088187219410  
0.4072508446171552 0.6930942574786126 0.5074601098279828  
0.4362284421026505 0.6219217213305155 0.4792991139029703  
0.3728395452579809 0.4596356916769101 0.5405976414377029  
0.5803785656703198 0.5294939005625116 0.4762853290208539  
0.5372405858198215 0.4222037740313069 0.5165316787831387  
0.6257207848520815 0.5417370092453837 0.4612885943335368  
0.5618237920287156 0.3797624282540372 0.5228829210527973  
0.6368344259027922 0.5345864122575010 0.4164794234826431  
0.6575775485087955 0.5579465626810640 0.4914905365088020  
0.5658179513481676 0.3505671505459751 0.4867084660164024  
0.5824127941960709 0.3706927078150870 0.5637516266249358



0.6806612400074892 0.5438284941742045 0.4005459733569650  
 0.7017862590021393 0.5681671260277738 0.4768354702822414  
 0.5909260186425055 0.3103399609975144 0.4908466285495676  
 0.6076714262449434 0.3306479117541398 0.5693699669889363  
 0.6916128216749892 0.5356204892836630 0.3557308088169588  
 0.7129571039138520 0.5613029616633586 0.4309991539813015  
 0.7336943240843479 0.5846400384280803 0.5069386618852147  
 0.5952664475722111 0.2814859536884329 0.4541104186902433  
 0.6113261850120223 0.3004340109759546 0.5326933280283594  
 0.6286144062080319 0.3211249658952015 0.6102854656708820  
 0.5752726730556448 0.5536343930730736 0.5765267446830168  
 0.3827305119354675 0.4813691782253756 0.6076077573183865  
 0.3556095044554324 0.4411234441574326 0.4740420577406567  
 0.4188670981929527 0.6029165194792983 0.4128591481704237  
 0.4456682059708834 0.6436934508106056 0.5463862143081417  
 0.2534383540373920 0.4219355016882604 0.5760191206957059  
 0.3748261635521335 0.7344656480817829 0.4570469863309708  
 0.6114449223969453 0.5195775284996049 0.3952060922911655  
 0.6492091534801929 0.5592950896082385 0.5268363336366216  
 0.5509717594964118 0.3609412336564332 0.4551714263550112  
 0.5799828843990569 0.3959378747800081 0.5898294444179232  
 0.7438809357424990 0.5755897715100761 0.4180150156768203  
 0.6247272669933404 0.2670069916846199 0.5383613707497334  
 0.3297952362526901 0.7197856032192872 0.4081013819707257  
 0.2161728905018736 0.4272761565303321 0.5193689672753390  
 0.4036070361967949 0.6325961893716234 0.3557791437418573  
 0.3131344726537057 0.4006112468896656 0.4440378931897506  
 0.5481489198421250 0.3063124104441864 0.4199158187488883  
 0.7542484838910417 0.5351447020758016 0.3639961617018685  
 0.6458812479951201 0.2501709874964049 0.4754048725579157  
 0.5976061330893617 0.3638209093335725 0.6455924420516607  
 0.6692219514202763 0.2786293961859049 0.5871282021122076  
 0.7846249104859899 0.5677821950849716 0.4734454064447879  
 0.6935667214217738 0.6065877378808062 0.5507874147449766  
 0.3582157586798962 0.4702530630587026 0.6672870951136158  
 0.2385660483012481 0.4582539061494809 0.6304163296753458  
 0.3534949270577949 0.7553392026562201 0.5177765651874272  
 0.4476292973434278 0.6998385573042808 0.5798622141359265  
 0.6322809865753697 0.5302372120382495 0.3341282439129217

**Pd\*-Pd DMSC**

1.0000000000000000  
 30.0000000000000000 0.0000000000000000 0.0000000000000000  
 0.0000000000000000 30.0000000000000000 0.0000000000000000  
 0.0000000000000000 0.0000000000000000 30.0000000000000000

Pd O C Li H

2 26 36 1 28

Direct

|                    |                    |                    |
|--------------------|--------------------|--------------------|
| 0.4856816206957644 | 0.5385875199678622 | 0.5933533907639755 |
| 0.4987744950132592 | 0.4997179432125906 | 0.4952894729028220 |
| 0.2985222040388213 | 0.4587927222998255 | 0.6749839657707754 |
| 0.3054874378785148 | 0.4024526585430820 | 0.4366726871942718 |
| 0.3915242090998750 | 0.6420937461555430 | 0.3539457409161930 |
| 0.4153163776159423 | 0.7426361880020752 | 0.5761069452322753 |
| 0.2408693888303732 | 0.4009270469948845 | 0.4720496638108073 |
| 0.4573309392910174 | 0.5854209853897387 | 0.5514093743590806 |
| 0.4307492724326973 | 0.4980863218115283 | 0.5839568030645875 |
| 0.3528260997296429 | 0.7025461856933419 | 0.3702544289964804 |
| 0.3709013185177445 | 0.7751466248030712 | 0.5272848829137897 |
| 0.4370282998358806 | 0.4761965305018361 | 0.5109188426075949 |
| 0.4713779021808090 | 0.5601818114763094 | 0.4805718143820223 |
| 0.2363263443565482 | 0.4396178755270482 | 0.6407972077537163 |
| 0.5917872095288556 | 0.5399092551618658 | 0.5321253478898086 |
| 0.5626307215634618 | 0.4507782778035406 | 0.5633971522623997 |
| 0.5236249928487342 | 0.4369360538686619 | 0.4999126547768512 |
| 0.5570985722696774 | 0.5196974638521682 | 0.4676771261529075 |
| 0.7145905277752963 | 0.5330077595799462 | 0.3239072940042595 |
| 0.7436044178714367 | 0.6052604017437110 | 0.5294676143566076 |
| 0.7870025472222466 | 0.5947966609629541 | 0.4711158520421286 |
| 0.5607415906203084 | 0.2927854413144587 | 0.4144226619232073 |
| 0.6103743676423560 | 0.2471121792892371 | 0.4439878476585978 |
| 0.6607434164933834 | 0.2694907159493365 | 0.6082258674070544 |
| 0.6324453522794141 | 0.3256157939000749 | 0.6464253103352584 |
| 0.6420905100290664 | 0.5207356921698362 | 0.3229735459120531 |
| 0.5300339218474427 | 0.5162264795508154 | 0.6378596551173183 |
| 0.5424249769541989 | 0.5589080880161360 | 0.6215806702975708 |
| 0.2800806487899553 | 0.4484174931548215 | 0.6354752808655658 |
| 0.2846096254381524 | 0.4110059996534156 | 0.4754980343357863 |
| 0.3809415329388976 | 0.6713031878063485 | 0.3863725380965854 |
| 0.3969325739420652 | 0.7393629839783343 | 0.5353547404423892 |
| 0.4561021286986143 | 0.5879921327922653 | 0.5092269255787790 |
| 0.4168010593779912 | 0.4799298641421068 | 0.5484128899348809 |
| 0.3474498158975777 | 0.4629690466286226 | 0.5910433028715504 |
| 0.3501041812146765 | 0.4439556336587437 | 0.5123516327877286 |
| 0.4197251209120522 | 0.6310948450549725 | 0.4466784966771000 |
| 0.4257468539445478 | 0.6642916056205391 | 0.5202875521448049 |
| 0.2821323070467186 | 0.4288652968909252 | 0.5556100149524397 |
| 0.3892505205657141 | 0.7060707733997484 | 0.4602700985182195 |
| 0.3028507700819861 | 0.4467736898138918 | 0.5944013005146248 |
| 0.3052549996757373 | 0.4278549455814747 | 0.5141245791740524 |
| 0.3964353923758424 | 0.6695555762849373 | 0.4306516032104021 |
| 0.4037507241184958 | 0.7037568625013710 | 0.5054266217118635 |

0.4338584798033107 0.6289914864042735 0.4909676961177652  
0.3704880831295220 0.4609371749042616 0.5505727132116810  
0.5904490523332949 0.5343494435744223 0.4908194673414832  
0.5507468608280116 0.4263142182920253 0.5317774681120354  
0.6316012778025709 0.5450495662873238 0.4640069151189734  
0.5693446539891506 0.3795409891547422 0.5296161071926725  
0.6342861638556033 0.5350382518737560 0.4186601479499175  
0.6680854108088209 0.5630451356206043 0.4865175642865214  
0.5663600293469088 0.3533223585939765 0.4912554001763437  
0.5923552946198052 0.3641463806342181 0.5670626202664351  
0.6744748258240368 0.5433356289673738 0.3943453001864740  
0.7088583838491314 0.5720607485129171 0.4637133999303651  
0.5869668969887046 0.3102372550779731 0.4898601372336243  
0.6122648480056864 0.3209743446964251 0.5676108438300640  
0.6769419540498742 0.5327813269488914 0.3486137512941845  
0.7115291170272544 0.5623745797849694 0.4172774517709494  
0.7452800172710767 0.5901626844084394 0.4872969320492239  
0.5857974792089174 0.2842500480219254 0.4507311885869722  
0.6091933864209040 0.2940193388808721 0.5286830641656900  
0.6343732310383806 0.3058327108004958 0.6062642251662733  
0.5664472169485196 0.5109991977252288 0.5817341034087656  
0.3646065244070976 0.4789517562386400 0.6188755482967720  
0.3689769080583455 0.4453784208867278 0.4812884138939544  
0.4252145549383408 0.6018066039827927 0.4258027315050116  
0.4354457404316179 0.6593680157063621 0.5550128889843019  
0.2506708466374546 0.4107685448063717 0.5588616841672958  
0.3776848478554743 0.7379117678986832 0.4468190087488166  
0.6054898748231560 0.5187410030846367 0.4035640780679691  
0.6641364142282790 0.5680205260959278 0.5223689585494423  
0.5497187045483414 0.3675510211930100 0.4621747573006497  
0.5958610218138070 0.3876165616637228 0.5946689205205119  
0.7404365564580278 0.5737764223348117 0.3981586119441035  
0.6188148181766970 0.2588921547450779 0.5304872061715845  
0.3381977055935925 0.7170842646870813 0.3954313635590161  
0.2249676032286098 0.4157841820237703 0.4962385439586847  
0.4160978017617039 0.6235303288188796 0.3644339225659619  
0.3376250907498721 0.4037178190519822 0.4418478127445842  
0.5391899708487456 0.3159478153805603 0.4219759645341386  
0.7402015079768709 0.5326078403481247 0.3439684070962368  
0.6351837095849879 0.2474911801470007 0.4650724778097921  
0.6093828818387701 0.3486098170844265 0.6455276467288683  
0.6691376704529860 0.2613230260634175 0.5778741041234017  
0.7896948109657843 0.5770491908543427 0.4440111533232475  
0.7125103118562346 0.6054404893570005 0.5392056428466327  
0.3308453617988905 0.4604668670310895 0.6713385876052294  
0.2220378953877758 0.4407180611596809 0.6115788253102656

0.3513452180865676 0.7680648965737629 0.5022694616525570  
0.4377637344047512 0.7192688111573787 0.5793553251791260  
0.6146199175559159 0.5258457989556534 0.3396978442942500

**Pt\*-Pt DMSC**

1.0000000000000000

30.0000000000000000 0.0000000000000000 0.0000000000000000  
0.0000000000000000 30.0000000000000000 0.0000000000000000  
0.0000000000000000 0.0000000000000000 30.0000000000000000

Pt O C Li H  
2 26 36 1 28

Direct

0.5074525396820594 0.5124973772328042 0.5579893034007838  
0.4956673308104588 0.4927662793978401 0.4769593230633471  
0.3255178271234753 0.4577911267579409 0.6626505280942231  
0.2760244768477560 0.4087201203643197 0.4272793204411648  
0.3844943939488507 0.6525937052368371 0.3634268840134172  
0.4210502025541276 0.7209426143399005 0.5969144124462418  
0.2205223017568540 0.4255188709767617 0.4727710665716353  
0.4748952768203306 0.5712514713898663 0.5422636284785951  
0.4484753067620400 0.4257141536152125 0.5472271057624694  
0.3495781464488870 0.7115615598850544 0.3900146519248804  
0.3762850995556281 0.7600018549169676 0.5537412321012267  
0.4337955596726635 0.4683750326888136 0.4856166811102731  
0.4640386788738912 0.5518845350101629 0.4687388451420609  
0.2558519614528338 0.4601572611109766 0.6393211434365060  
0.5705657631833273 0.5770723691724102 0.5034554804237271  
0.5411456187677197 0.4536602347401617 0.5634622151110632  
0.5280067847466412 0.4352832138888093 0.4897740267358457  
0.5562766364925378 0.5171362702754289 0.4582846633882944  
0.7205328562995907 0.5156219420491117 0.3245882048331000  
0.7410924205778493 0.6045644105067611 0.5240138796958214  
0.7854459043848940 0.5794742931301290 0.4709157479269945  
0.5703558917509520 0.2881748152415698 0.4286428036461620  
0.6202805332072068 0.2475743136520459 0.4645124085950167  
0.6595370990905853 0.2888253913612583 0.6285056993054353  
0.6252487460673712 0.3453760516858921 0.6607852580796891  
0.6473584318043978 0.5110230754361149 0.3171319981799833  
0.5367980383648567 0.5775370409604340 0.6180542527132521  
0.5243016124306608 0.5338879938929926 0.6185109269968319  
0.2987022120228486 0.4543294727785426 0.6268150817665139  
0.2653128772858104 0.4224066320254667 0.4687890628090767  
0.3772062017135457 0.6775149420922731 0.4001204732418267  
0.4020457571614942 0.7231907388829230 0.5562930645901689  
0.4597404081830099 0.5782827786082504 0.5023836080340365  
0.4228398326017175 0.4437078707102209 0.5206780208366576

0.3591350571782732 0.4460988727913191 0.5719405775174776  
0.3427453546205066 0.4354210264220421 0.4932829514360181  
0.4185962561303016 0.6290505151658962 0.4514989899460077  
0.4303886332516486 0.6512101375166702 0.5290185903429840  
0.2815571611466594 0.4374841807816037 0.5479121032073850  
0.3909707082689927 0.7016606461523635 0.4776756932959043  
0.3127819826503840 0.4462202045860618 0.5827392230636285  
0.2960610209766780 0.4318869902940711 0.5029780380953679  
0.3954027875156094 0.6696158830764635 0.4426027720690456  
0.4077409446261342 0.6923908045191547 0.5213987420768439  
0.4360364436437692 0.6206530897661230 0.4940891655903842  
0.3732800818357893 0.4412053053950617 0.5278894773327821  
0.5808734578530053 0.5493391158661158 0.4739560872409539  
0.5434056983002510 0.4278349198835481 0.5295000257788757  
0.6262231019933828 0.5512888072999740 0.4529654658351561  
0.5667762809268637 0.3845796903493087 0.5351092159935599  
0.6325969974177279 0.5341016534584879 0.4101258763968555  
0.6618007565573504 0.5689960018533676 0.4773737158673452  
0.5695067561876012 0.3553006440531856 0.4988463813960343  
0.5867932496687430 0.3742354883896014 0.5759473429003800  
0.6754752719789815 0.5359932318074571 0.3894646713537094  
0.7058358910446838 0.5690811837753783 0.4590516333942958  
0.5923102578099391 0.3137336359928083 0.5030159883664236  
0.6103098413969124 0.3331889635460452 0.5813885179916852  
0.6809181363756920 0.5213406513264061 0.3452700286716064  
0.7119565474411200 0.5534964767116817 0.4144143791872321  
0.7425853512972600 0.5840695337822820 0.4840041994119874  
0.5941662344234188 0.2842162670226075 0.4666029936039263  
0.6125187841359634 0.3028234760880423 0.5447259775546146  
0.6308361943548696 0.3229390308268237 0.6223061306263743  
0.5422646512254841 0.5898415150441427 0.5561201204223289  
0.3850109159080271 0.4516043274133162 0.5969450681356935  
0.3550494897492719 0.4354258871119658 0.4590514777829020  
0.4217153847461493 0.6028986969550602 0.4264650349280775  
0.4418929837873754 0.6413802030365382 0.5620815590821725  
0.2470287302347887 0.4294044360947688 0.5564693038163737  
0.3803128393815078 0.7355651834721288 0.4695102819269722  
0.6043283609216266 0.5179296947557084 0.3939866952598118  
0.6550139347966338 0.5803879023387010 0.5112508722325401  
0.5552109443641479 0.3661169094446532 0.4672478144470392  
0.5852774575542716 0.3992134876301263 0.6023125187533024  
0.7433838611960177 0.5604783429949608 0.3973261765388434  
0.6240024420248365 0.2686923228643653 0.5504865728305733  
0.3380428391469736 0.7238935985396837 0.4178435563325974  
0.2138869050269487 0.4442177548085508 0.4985575311804950  
0.4091200192871050 0.6322128325667866 0.3694236703747455

|                    |                    |                    |
|--------------------|--------------------|--------------------|
| 0.3072798447443623 | 0.3996376419046432 | 0.4273193100266763 |
| 0.5467569037340146 | 0.3100344948405671 | 0.4335484699864205 |
| 0.7437263595137154 | 0.5133704990170762 | 0.3473019324566780 |
| 0.6434501670261330 | 0.2503793148251220 | 0.4871945447198041 |
| 0.5999499993070060 | 0.3655798706398547 | 0.6575017995810594 |
| 0.6700795048244764 | 0.2791443444437853 | 0.5992645232496829 |
| 0.7862041950084947 | 0.5571519610007463 | 0.4472096318890580 |
| 0.7103015090985082 | 0.6125978672267893 | 0.5306414077791355 |
| 0.3558592402426782 | 0.4498785809126102 | 0.6539262685496984 |
| 0.2381605585971097 | 0.4654957032547894 | 0.6125310106298734 |
| 0.3564289552503928 | 0.7567831131688911 | 0.5281441342794139 |
| 0.4431151730444579 | 0.6970331165469387 | 0.5970373562435222 |
| 0.6194337214021027 | 0.5212171465991989 | 0.3304028611233257 |

**Cu\*-Fe DMSC**

1.0000000000000000

|                     |                     |                     |
|---------------------|---------------------|---------------------|
| 30.0000000000000000 | 0.0000000000000000  | 0.0000000000000000  |
| 0.0000000000000000  | 30.0000000000000000 | 0.0000000000000000  |
| 0.0000000000000000  | 0.0000000000000000  | 30.0000000000000000 |

Cu Fe O C Li H

1 1 26 36 1 28

Direct

|                    |                    |                    |
|--------------------|--------------------|--------------------|
| 0.5031122252144673 | 0.4977982574353061 | 0.5876121388899183 |
| 0.5005899652692143 | 0.5011647501639122 | 0.4920502823261760 |
| 0.3086434200036504 | 0.4661063473998724 | 0.6752617551730554 |
| 0.2950981247250038 | 0.4080836714864852 | 0.4371841952457486 |
| 0.3842301835298212 | 0.6333010176063040 | 0.3568375348231494 |
| 0.4104622155252362 | 0.7437053044636066 | 0.5743895383190412 |
| 0.2334895555760188 | 0.4113193271262083 | 0.4772898247737508 |
| 0.4972211143059783 | 0.6053773039720626 | 0.5374759686602838 |
| 0.4407611936144168 | 0.4853884917362468 | 0.5774079119509345 |
| 0.3398731953375043 | 0.6894929638963614 | 0.3738775639211244 |
| 0.3591638905237649 | 0.7682375210471970 | 0.5278315469923845 |
| 0.4376354903348735 | 0.4751165940263386 | 0.5025067377157486 |
| 0.4728614124008569 | 0.5603277505103550 | 0.4820577625165733 |
| 0.2430371300446363 | 0.4518173878254146 | 0.6453173216446283 |
| 0.5680147271475516 | 0.5353080965145792 | 0.5086855510852714 |
| 0.5357468906890028 | 0.4393867466125853 | 0.5801552016146062 |
| 0.5279241003722279 | 0.4420966819780486 | 0.5050762710087450 |
| 0.5499619523332900 | 0.5103957713734881 | 0.4413428685616620 |
| 0.7317209414023211 | 0.5348872659386931 | 0.3290911486705281 |
| 0.7252998260229939 | 0.5926273971748095 | 0.5400910236941103 |
| 0.7763276319063458 | 0.5853788667617067 | 0.4877947735042237 |
| 0.5647496051922218 | 0.3058018845588099 | 0.4139352264705060 |
| 0.6160428480930431 | 0.2594940253642267 | 0.4392837304581315 |
| 0.6639960411585349 | 0.2700093411379079 | 0.6057690114849261 |

0.6329709676259829 0.3205511167524628 0.6491919091211584  
0.6607875509812753 0.5227479011961148 0.3135732811356141  
0.5693028705131743 0.5660115848769490 0.6137188343961549  
0.5354299458175668 0.5374777486897719 0.6223064678828891  
0.2870019769552701 0.4567862321526441 0.6370752428861458  
0.2780143349552514 0.4181582821569406 0.4775061574850036  
0.3724069841806169 0.6623359426900398 0.3890053031600579  
0.3906376374028745 0.7368357819635187 0.5347502930876737  
0.4727490625690761 0.5970555271862789 0.5044130506080671  
0.4204593586710551 0.4749713873563965 0.5414516000433518  
0.3524868720263507 0.4650012306445567 0.5883650958041445  
0.3481678726240721 0.4465997127635767 0.5095582797549718  
0.4205297869316560 0.6296432453011976 0.4469568376309134  
0.4311287472175401 0.6675599351020340 0.5177113073804182  
0.2824800900536066 0.4362505565433694 0.5574802169493063  
0.3818281426971555 0.7003841529492298 0.4613577986278281  
0.3069562787272569 0.4527506989178146 0.5947405486113209  
0.3025520822084430 0.4335966006121790 0.5144504253838962  
0.3911511556374385 0.6641519175899485 0.4320338529850623  
0.4008355258907729 0.7020042702012268 0.5049386806110989  
0.4406990087047885 0.6323369653757838 0.4888815900343028  
0.3725320424400427 0.4614533932352788 0.5464038232434436  
0.5784386976901882 0.5274901100059017 0.4678991910356063  
0.5414007218282880 0.4237227530341909 0.5412982584157984  
0.6244281697712202 0.5381609829201781 0.4519873537659719  
0.5656954546981882 0.3803067087599792 0.5367264534632812  
0.6353538254247592 0.5305870108797023 0.4072757534049909  
0.6562092937265595 0.5542415658738152 0.4820987409819540  
0.5671030630646677 0.3587746368379992 0.4954141339179554  
0.5877805443847595 0.3626182988486156 0.5737051266116635  
0.6791730074935920 0.5401643000970245 0.3911525133793379  
0.7004799461247190 0.5642548432222665 0.4674789949638410  
0.5901586198080606 0.3173354038685237 0.4905734291782711  
0.6122493362258180 0.3219477826790502 0.5701754541207634  
0.6901000398391373 0.5328091074372584 0.3461121045670945  
0.7112587721144987 0.5576928607306405 0.4215730259294941  
0.7327076401812368 0.5802988067923375 0.4976267960335687  
0.5902671860415912 0.2950015974275232 0.4492710741558902  
0.6124329752481918 0.2990780182544098 0.5284312627719056  
0.6354751571726569 0.3048071807981279 0.6072515540092865  
0.5469271316205528 0.5718988013326358 0.5556196348138716  
0.3727255125293075 0.4788650353309628 0.6152556896457509  
0.3647669979483629 0.4469413370147181 0.4771921343779206  
0.4271651016895495 0.5997966311568027 0.4271432552371451  
0.4470624470664913 0.6665421328313842 0.5504069241049269  
0.2500763152174948 0.4203759608654001 0.5629721458551180

0.3642963501514030 0.7296639852157221 0.4484325492982370  
 0.6096698877558244 0.5156096427304901 0.3862328303576490  
 0.6463383263902800 0.5570482134422622 0.5170183885867563  
 0.5515473094953006 0.3757311090862948 0.4672065189106979  
 0.5866502783972255 0.3821799032426179 0.6043586554196292  
 0.7424044132565453 0.5713582668126109 0.4084246836874639  
 0.6249471343888758 0.2648757137976100 0.5268786420006007  
 0.3257382994154429 0.7038241097198766 0.3994333085162942  
 0.2206487088877060 0.4269618077597178 0.5027880187839679  
 0.4116210957687585 0.6183162670783731 0.3660739580827839  
 0.3275338722037230 0.4070450475406504 0.4396261326628677  
 0.5421931850035886 0.3271883785751757 0.4236120160748084  
 0.7529830545089669 0.5324518641933262 0.3536021033728877  
 0.6402840409781880 0.2580243190139229 0.4609369873339039  
 0.6094209334596780 0.3429735728576259 0.6506489641806847  
 0.6720250075592248 0.2647684967609605 0.5746551591412365  
 0.7826689601562269 0.5686472678825345 0.4606120617904912  
 0.6932687301026618 0.5930450564632499 0.5457746345110027  
 0.3406892710191119 0.4642668537162116 0.6698342781480430  
 0.2271020931394862 0.4536789464765912 0.6169986914316523  
 0.3397525950095821 0.7581440138645820 0.5037575573136542  
 0.4356368449889434 0.7232718832803439 0.5772677827742757  
 0.6306599520990900 0.5271873565552982 0.3250728140509840

**Cu\*-Ru DMSC**

1.0000000000000000

30.0000000000000000 0.0000000000000000 0.0000000000000000  
 0.0000000000000000 30.0000000000000000 0.0000000000000000  
 0.0000000000000000 0.0000000000000000 30.0000000000000000

Ru Cu O C Li H

1 1 26 36 1 28

Direct

0.4920787960725387 0.4915004501879868 0.4692873425395204  
 0.5025814870312661 0.5171264159398142 0.5452330899120065  
 0.3272749096061169 0.4726391776114784 0.6760066715415032  
 0.2809250488957438 0.4030829244763953 0.4451381639386811  
 0.3771246557294972 0.6516887561294965 0.3500854447824032  
 0.4243278934824807 0.7216949424199519 0.5804968532700991  
 0.2247248929502576 0.4101167772780573 0.4922494449497348  
 0.4819269871843196 0.5788468130317893 0.5241319904812145  
 0.4438758310280003 0.4847288774588621 0.5615098975700086  
 0.3399097163827896 0.7087894733417028 0.3779924573562051  
 0.3745855514244986 0.7596874966935484 0.5418568926340809  
 0.4311527919637099 0.4685095313825569 0.4885865269801345  
 0.4627747795000742 0.5515200241002484 0.4560643319231678  
 0.2577815099575846 0.4576030077299997 0.6570576478272843



0.5732169788919493 0.5383864818316001 0.5199961162810087  
0.5332433170965829 0.4454827654343569 0.5558314299348299  
0.5215267462606995 0.4318467951568881 0.4825613188253967  
0.5531995131380365 0.5146083303305388 0.4512723529203792  
0.7326836065028326 0.5355541472945690 0.3379488098489992  
0.7256184400786871 0.6000182557237569 0.5474114770317771  
0.7787660366216160 0.5882647878397392 0.4976942011924931  
0.5720996324936134 0.2866782464610830 0.4146370712404723  
0.6233144943767118 0.2473549744387596 0.4500392080002552  
0.6599614036142413 0.2856209769780858 0.6162668385688728  
0.6237631990214954 0.3411032248718452 0.6484279003545498  
0.6615156591598140 0.5238645394305118 0.3230962877600509  
0.5656184046772257 0.5164484911568732 0.6229601775040953  
0.5207618567157124 0.5331311451395575 0.6075530486512435  
0.3000978572929470 0.4612237557846272 0.6420865983354875  
0.2691746459070183 0.4151931612489899 0.4868248433356384  
0.3699846013008101 0.6764543205899856 0.3869298600494270  
0.4019738411476126 0.7239424652971639 0.5416031763596472  
0.4624684438355733 0.5818139229620838 0.4866681916052134  
0.4191844397737307 0.4712980743587497 0.5298893596871338  
0.3581617387948689 0.4648680082010243 0.5848514183902527  
0.3434893193818806 0.4421773569125497 0.5084421732084802  
0.4159794430019689 0.6300572358835423 0.4362969988552109  
0.4317032614015694 0.6538670239490559 0.5121559925928629  
0.2841462382822487 0.4366099897063596 0.5648345215117035  
0.3863521538698442 0.7015052709768772 0.4636363636746299  
0.3136494511993597 0.4542475008755937 0.5977066470170345  
0.2985290101526267 0.4311135954472818 0.5197767783250448  
0.3904466055823372 0.6695474066336631 0.4285861702010333  
0.4063642828951464 0.6936155388296574 0.5060669952622889  
0.4365100579340368 0.6231823884363586 0.4775032685558367  
0.3725189652170001 0.4583346718030199 0.5410508661173683  
0.5813106157233570 0.5314202865561601 0.4790040641825596  
0.5371358697053903 0.4215175458540561 0.5212135627352872  
0.6264131986523199 0.5425684903320095 0.4613208398436544  
0.5621454582022691 0.3786751999584352 0.5245829108046480  
0.6367912437545677 0.5345517368751038 0.4166149459371152  
0.6586709545034827 0.5589092691833015 0.4907356337008697  
0.5656780732108332 0.3504567427915494 0.4877062019703909  
0.5837171471953712 0.3685355726083211 0.5646227445622438  
0.6806084092429537 0.5432890008698589 0.4001022975508943  
0.7027787419282704 0.5684997448126415 0.4756687865484222  
0.5909593377232055 0.3101988133722388 0.4905369746547892  
0.6089592365986527 0.3284388664484158 0.5691692414125176  
0.6910892195433249 0.5346107687976215 0.3552202653133588  
0.7133483724763199 0.5609035509622894 0.4299149576837709

0.7345672947639780 0.5850669505906895 0.5058950830975159  
 0.5950961156513989 0.2823283543582507 0.4530236453671767  
 0.6118703555856835 0.2990485356663458 0.5318657210712265  
 0.6301236655122525 0.3187727954916293 0.6098933122597224  
 0.5284557285846910 0.4710627862878055 0.6118772278198064  
 0.3821400484836059 0.4800613366094280 0.6076027658828248  
 0.3558276423023159 0.4404522101462009 0.4742701552530998  
 0.4185828349088180 0.6034953511398102 0.4115855786214948  
 0.4466926831003665 0.6447191980065179 0.5440337844706516  
 0.2522660983674418 0.4223375932515170 0.5752699277986849  
 0.3724827369201298 0.7343958851461184 0.4562812114284189  
 0.6109996283545434 0.5194458779952087 0.3959011754122121  
 0.6498025688402490 0.5610808243143272 0.5259051237419934  
 0.5503923590757571 0.3615995637671396 0.4566459603814043  
 0.5828538062107034 0.3936696952525866 0.5908841547003389  
 0.7445983723517846 0.5740455861766270 0.4165597767648266  
 0.6253799553253736 0.2655481021823159 0.5366631438073198  
 0.3284812264564875 0.7200316192411466 0.4063172203169481  
 0.2157272925735409 0.4274270312146296 0.5183083982520557  
 0.4026778613757642 0.6322747562831156 0.3555454024703487  
 0.3134102184620818 0.4016878954397721 0.4435873752627943  
 0.5483991309973096 0.3085124449201687 0.4191954169655613  
 0.7538546158793737 0.5342948833143211 0.3626522327317911  
 0.6455273075853545 0.2503013567202224 0.4736530689568227  
 0.5982148153115895 0.3609262627866911 0.6447426631671194  
 0.6711985332310153 0.2764245486472572 0.5871569384200251  
 0.7858402030753400 0.5686159506331079 0.4727418220937065  
 0.6934330059234941 0.6040482693512468 0.5500995429487753  
 0.3580748043818498 0.4710299832762544 0.6655755674889271  
 0.2378418980746120 0.4579997084271922 0.6313710096303627  
 0.3530226073771463 0.7561163525798541 0.5177763534993637  
 0.4467824061986967 0.6982177761850006 0.5782196008945454  
 0.6314727830818443 0.5286032720039068 0.3346737466926475

**Cr\*-Ir DMSC**

1.0000000000000000

30.0000000000000000 0.0000000000000000 0.0000000000000000

0.0000000000000000 30.0000000000000000 0.0000000000000000

0.0000000000000000 0.0000000000000000 30.0000000000000000

Ir Cr O C Li H

1 1 26 36 1 28

**Direct**

0.4910762893886286 0.4904432417430979 0.4659186105134044

0.5061357797038976 0.5108259959889851 0.5407227775773372

0.3295442620452610 0.4731225572739727 0.6762003326857308

0.2812371960417533 0.4015144556271000 0.4461525870186424

0.3793382708602433 0.6514879030499937 0.3517061258857101  
0.4252298148856478 0.7209224941904129 0.5829316541226033  
0.2258396062216994 0.4092145037849336 0.4941380992047130  
0.4785647174907621 0.5708360072830531 0.5259618049656002  
0.4460207497073810 0.4880056907785186 0.5561462473936634  
0.3430722616688640 0.7089888585494682 0.3801244684179134  
0.3763532746858844 0.7584728663254660 0.5426865930802449  
0.4303887641184810 0.4677659308330824 0.4848045454467657  
0.4629391889591642 0.5507310229030569 0.4546091074677946  
0.2603008982820150 0.4579408876776248 0.6565310889402702  
0.5674675322956035 0.5345308311800276 0.5173533986434927  
0.5338656176220620 0.4506892196596626 0.5480718478493380  
0.5191558872073895 0.4300071753799996 0.4766907361832691  
0.5519701571794636 0.5128632851965627 0.4468544010895913  
0.7322940323685472 0.5376112556361610 0.3393517157021675  
0.7233365420635657 0.5993530030116959 0.5488206497386302  
0.7761058455124422 0.5873438976482552 0.4986961308192103  
0.5714753072043536 0.2835390173766518 0.4164914052355413  
0.6226754337139402 0.2459995852970850 0.4539242276355995  
0.6567791909269384 0.2902812940696772 0.6179084592181558  
0.6211847114200577 0.3468750274377628 0.6485468225028121  
0.6615522584791004 0.5259755609710494 0.3227650582172413  
0.5604344094542247 0.5194295688019422 0.6198309715837960  
0.5198963941494876 0.5301422417221983 0.5982984681717542  
0.3027743464724980 0.4616763817366792 0.6419978905550766  
0.2701501104907419 0.4143948705062155 0.4878174908789388  
0.3725443325252292 0.6760329178262027 0.3887975154791422  
0.4036524374807872 0.7226465176581739 0.5435034814007768  
0.4613027371640953 0.5783695902919107 0.4876620432628024  
0.4197456713139799 0.4724151856436443 0.5263523465336454  
0.3606649733276888 0.4657253131305207 0.5840372080594162  
0.3444592074724854 0.4424459421525822 0.5078497804389551  
0.4175722837309840 0.6287615542121686 0.4382746149207353  
0.4328648417532704 0.6515699554825604 0.5147794284901003  
0.2863327925656020 0.4367040997085747 0.5653523107143049  
0.3889341069566605 0.7004596722666001 0.4656908988017388  
0.3163695891490724 0.4547588172698617 0.5976419810072374  
0.2998980965901382 0.4309514102411310 0.5200512945554160  
0.3927657177749294 0.6686255285553279 0.4304436243897020  
0.4084139367296146 0.6919830664619122 0.5083660687302513  
0.4373408739625283 0.6209461393900740 0.4798572187851536  
0.3740620980371915 0.4592149824892465 0.5398129034950245  
0.5786746111451974 0.5291786186163799 0.4760571628226469  
0.5364177404240260 0.4231431506117876 0.5156480675504460  
0.6240227184800247 0.5416216841631263 0.4610909333689135  
0.5611350509228535 0.3807912911191782 0.5220207640981741

0.6352785353685495 0.5348335467687442 0.4162427065474937  
0.6558820426939805 0.5575874330445856 0.4914682716422825  
0.5654344862453448 0.3511570823342758 0.4861938282426642  
0.5815274848370261 0.3722303265513526 0.5630762980965278  
0.6791577974830427 0.5441706982163714 0.4004935912034000  
0.7001224640836674 0.5679354799253890 0.4769720951661788  
0.5903988231334119 0.3109280840928962 0.4910896572969082  
0.6068144993919860 0.3323614387427115 0.5694011435174253  
0.6903860506383265 0.5362252896118374 0.3556791570617575  
0.7113749968738065 0.5614223994306877 0.4311311897269605  
0.7319784913855850 0.5842350856774914 0.5072362680046149  
0.5946002882889072 0.2812319042956479 0.4550279602618984  
0.6106312301126861 0.3016036382207307 0.5331910627205375  
0.6274077004216398 0.3236515557665818 0.6106510448060122  
0.5755493813635529 0.5553602605227160 0.5751092261600204  
0.3846699096851161 0.4810037507501594 0.6067045733091205  
0.3560470054671913 0.4406618510626025 0.4734312499675217  
0.4200264875789216 0.6024361493911878 0.4133204596541457  
0.4467059351232757 0.6422424309720914 0.5471111517100276  
0.2550035234939906 0.4217456683848723 0.5764776366629274  
0.3762084017042235 0.7337924224307865 0.4581963149712652  
0.6099637153033517 0.5200141764292244 0.3947714808946381  
0.6477102818901235 0.5583329907819059 0.5268946137317206  
0.5509087857988818 0.3610329131242043 0.4543591028381106  
0.5787969182461480 0.3978693863543027 0.5887633710926015  
0.7423574883411581 0.5757364383992039 0.4183643419993526  
0.6238278096180082 0.2681877914321091 0.5394251800680155  
0.3314893110789965 0.7199000864954422 0.4085255936652497  
0.2171362372504999 0.4272676252507120 0.5197952696256314  
0.4049265241873775 0.6320300787273895 0.3567479733102234  
0.3136535951499564 0.3993630589613870 0.4442995860662127  
0.5472571134676169 0.3049456997597814 0.4202637943213899  
0.7529954570742070 0.5357955273655602 0.3644231644358291  
0.6454571488567558 0.2505105700797307 0.4767338222874072  
0.5966215123348874 0.3678054223515420 0.6442881797962914  
0.6673291537920131 0.2796404105905914 0.5890126448397436  
0.7830624480406021 0.5673301468137686 0.4739567861947065  
0.6916893870557371 0.6065557221541542 0.5507166957828989  
0.3605561838225704 0.4704023267497641 0.6667069553523904  
0.2406263994858292 0.4587061222527326 0.6306107774877997  
0.3547278939023592 0.7541620383834855 0.5187390971988448  
0.4483421003225318 0.6981005209570924 0.5811035614940003  
0.6312400274130230 0.5310010392608557 0.3334631322043377

**Fe<sup>\*</sup>-Co DMSC**  
1.0000000000000000

30.0000000000000000 0.0000000000000000 0.0000000000000000  
0.0000000000000000 30.0000000000000000 0.0000000000000000  
0.0000000000000000 0.0000000000000000 30.0000000000000000

Co Fe O C Li H  
1 1 26 36 1 28

Direct

0.4942692446832365 0.4953286161633264 0.4815523659569441  
0.5047188312087184 0.5128639522126418 0.5556362374719868  
0.3175505969086023 0.4673362419946778 0.6730964225895536  
0.2908703373601322 0.4012129430033854 0.4382661106651108  
0.3872420442301988 0.6418807269883560 0.3542970963144208  
0.4229697747696988 0.7296248598636866 0.5808474603408534  
0.2313924929816783 0.4063980485769716 0.4814674691488747  
0.4787050785008158 0.5755567967361157 0.5387638726015646  
0.4423114428915424 0.4882497996853695 0.5669828195820154  
0.3487945129040396 0.7005939272855830 0.3767477512819259  
0.3755234616524064 0.7634959967022291 0.5359219473076114  
0.4363260860578248 0.4723819778825410 0.4934549317019999  
0.4683841903990874 0.5507356731405124 0.4683451214629017  
0.2501746620274738 0.4527921591918546 0.6473226894007776  
0.5756453092570698 0.5410351418731590 0.5269742538557801  
0.5371852932388566 0.4524577446100168 0.5580068100412345  
0.5190558060643308 0.4378518592817778 0.4863319472809317  
0.5504712037461885 0.5158763446211168 0.4607765162252935  
0.7194578612226896 0.5324626246568362 0.3318291446966783  
0.7329695881395704 0.6020614677492715 0.5388105260856091  
0.7807187267641634 0.5856897268720467 0.4849444911899292  
0.5644876648182066 0.2918194129697004 0.4157844986956983  
0.6158420261142498 0.2509419583202251 0.4492410702596286  
0.6571909120642860 0.2856254479914641 0.6141266005869477  
0.6260432380133402 0.3428956097774572 0.6480064986979600  
0.6470782590293467 0.5218870933279871 0.3233835095975136  
0.5671767640914986 0.5144633783250799 0.6311797278845895  
0.5291663123065452 0.5323319984586744 0.6111720736363339  
0.2936729956558357 0.4571336732863017 0.6364532478707500  
0.2758863442577818 0.4130741433847067 0.4789735757261586  
0.3783979121517368 0.6689546971915368 0.3891164550545542  
0.4028573932051299 0.7280258761784025 0.5406945459193579  
0.4640195878905765 0.5803025589465891 0.4991450428409996  
0.4204824239873252 0.4741211094174669 0.5332737897285155  
0.3561017502384748 0.4639874801933592 0.5838796402226945  
0.3475336420675542 0.4428724575014530 0.5059626539384741  
0.4217457511407467 0.6261650995413435 0.4440254198065767  
0.4334825532553886 0.6550361388566027 0.5189844628098603  
0.2845353925869716 0.4341601662961669 0.5578697074278511  
0.3912951687773005 0.6994086739104370 0.4644686855371851

0.3110696044468684 0.4518234380496463 0.5931858883205289  
0.3023111460185378 0.4299162469799544 0.5138968395346765  
0.3968955603287396 0.6650041846220595 0.4320495884582408  
0.4090529417105351 0.6945783973941790 0.5083899314538404  
0.4397498795538810 0.6218808430494389 0.4868503164422876  
0.3736616890970104 0.4592576386179759 0.5409300902450382  
0.5808065870850198 0.5330077244459840 0.4855597527836124  
0.5377181761346508 0.4275224080947494 0.5235643103361647  
0.6245420569378182 0.5433808991573332 0.4640282486085789  
0.5615738547795964 0.3840733163864592 0.5261244818261839  
0.6310151979307628 0.5338840954965194 0.4188309284955116  
0.6594520563136265 0.5603934031957511 0.4899561384602218  
0.5633992976048908 0.3561627523425351 0.4888075467949860  
0.5833110650789772 0.3727800921837897 0.5657718809932296  
0.6732855222481996 0.5416550859215981 0.3982164194716404  
0.7023743613495940 0.5683917829718459 0.4708885318559482  
0.5870607697639615 0.3148594837470841 0.4908060914009008  
0.6073973228732508 0.3318468024875911 0.5692392804834332  
0.6795543555607598 0.5322621843885910 0.3527175934688463  
0.7088437664796764 0.5592062228928333 0.4246376101320178  
0.7373819382322804 0.5848646373040456 0.4973419330374834  
0.5889405892586911 0.2868570026686920 0.4532025225947927  
0.6084772639206337 0.3027541683709759 0.5315565305176844  
0.6293172150045542 0.3206335181065606 0.6092136068026278  
0.5858254372742915 0.5506587913842292 0.5866222379129608  
0.3777033447559501 0.4790002558959898 0.6089946277540796  
0.3621818544929286 0.4423141293583089 0.4726671007655462  
0.4255302615275107 0.5979719711318376 0.4213651568392165  
0.4461845686275140 0.6483679351913875 0.5524334096687736  
0.2526430430498280 0.4183594514226760 0.5657749529018026  
0.3784382912809779 0.7318299364750322 0.4538390534127834  
0.6034332037078777 0.5184418809012397 0.4008323719725019  
0.6539839908939286 0.5646507195617069 0.5256265932991427  
0.5479187545631814 0.3680526089429078 0.4581128252480105  
0.5821033593673195 0.3971651039249727 0.5927806230969609  
0.7389978458220787 0.5715226406388172 0.4082858724597641  
0.6208249783590168 0.2686623878534363 0.5355598116482483  
0.3356524333199502 0.7132276761927732 0.4037168732255345  
0.2200111267222713 0.4236201704839302 0.5066446334994178  
0.4129262962470555 0.6233982234162432 0.3618933962927889  
0.3233856318533930 0.4000061531995117 0.4391977870242342  
0.5410395572458860 0.3136207950716576 0.4216026234479876  
0.7427721961445012 0.5307127911623813 0.3544796829323571  
0.6394108719280833 0.2534145298149760 0.4715527064105125  
0.6027824629456283 0.3655355994442915 0.6454191130835365  
0.6656272204516391 0.2751094707528845 0.5845083784468654

0.7847625164612870 0.5640158960405772 0.4609754378952438  
0.7018065864726133 0.6102403853156627 0.5431772962123118  
0.3492304511858899 0.4647792324242145 0.6660374889544668  
0.2326204124905338 0.4548697714387662 0.6199935289883635  
0.3548879959814717 0.7571925293215790 0.5115531010324581  
0.4463131420859857 0.7069640460280191 0.5816668951022261  
0.6182730634682601 0.5280460886340391 0.3372097285097810

**Fe\*-Ni**

1.0000000000000000

30.0000000000000000 0.0000000000000000 0.0000000000000000  
0.0000000000000000 30.0000000000000000 0.0000000000000000  
0.0000000000000000 0.0000000000000000 30.0000000000000000

Ni Fe O C Li H

1 1 26 36 1 28

**Direct**

0.4920337907638151 0.4939685721985089 0.4750287537387166  
0.5024191286979161 0.5177322148130054 0.5519566329290345  
0.3202043542255832 0.4699679721424945 0.6749446875282428  
0.2869968619378366 0.3986009285044222 0.4424871260690037  
0.3843657156649948 0.6502575264124766 0.3511262354663986  
0.4249966285732782 0.7284767053617559 0.5800444555143609  
0.2287790540855384 0.4036430262671529 0.4872263726883785  
0.4772819574839910 0.5765567834790849 0.5315052181712058  
0.4423721329162287 0.4889927556483623 0.5626546797218579  
0.3483684467029851 0.7096086486760798 0.3755744994265994  
0.3768552014652298 0.7646029377477204 0.5378032201872409  
0.4320822667681334 0.4697524113172476 0.4902963110500195  
0.4640235103117407 0.5522743741620731 0.4612344264436291  
0.2523026338111230 0.4543141165252268 0.6514884647588691  
0.5740367050479163 0.5348706956151235 0.5235944320040764  
0.5413160128172624 0.4535769540874180 0.5523527991879960  
0.5186895304371472 0.4336731926643663 0.4833175358573286  
0.5506968784734896 0.5168850836217742 0.4541936129830985  
0.7260604993966879 0.5359633721068626 0.3347861457634275  
0.7273635296075052 0.6055851532705323 0.5425481185044856  
0.7775636218322471 0.5931932753997956 0.4901586573850293  
0.5654798556853960 0.2861574515165037 0.4181662102793400  
0.6158280060301080 0.2455215579510026 0.4532770975149904  
0.6584394487571845 0.2875705650665849 0.6167118080225745  
0.6263053389315931 0.3455509525984842 0.6484346387204317  
0.6546782649561403 0.5219963036888811 0.3237164814040007  
0.5658489506597436 0.5139473677048652 0.6304385764890880  
0.5279554441491199 0.5267658680643841 0.6080498448448722  
0.2954291846140122 0.4585331261831992 0.6393432279696812  
0.2730793963366550 0.4107228838941705 0.4834505779827873  
0.3766712866360497 0.6764528979721197 0.3867920485706250

0.4039062374924664 0.7287277762240467 0.5404476138801537  
0.4613494773297688 0.5812850398792273 0.4920352723090332  
0.4189006673156432 0.4733414377904611 0.5304314656707837  
0.3563457055259907 0.4644197206836403 0.5847113343395259  
0.3452366451896741 0.4412997013837138 0.5078112897367180  
0.4190413989613034 0.6303306643981470 0.4397098126656010  
0.4326980285253584 0.6561040639563848 0.5153352192921693  
0.2841123043585238 0.4334929029328142 0.5617465681767553  
0.3907295223752861 0.7034238225243519 0.4632827168833789  
0.3116672930920536 0.4521796177696715 0.5957201557001177  
0.3003990147136840 0.4283348878288121 0.5173377263449133  
0.3951538008518591 0.6702418969530963 0.4294947783362740  
0.4089524182648624 0.6964863219137728 0.5066618924410018  
0.4375907774855475 0.6239756682880033 0.4819667842685417  
0.3724524401281144 0.4586971599316874 0.5413848818493237  
0.5800545251585882 0.5306684418347379 0.4814418610156516  
0.5393960282845771 0.4261750143888763 0.5194514765319740  
0.6249882659918047 0.5424928254615945 0.4628075320563025  
0.5633821835101538 0.3826889927201315 0.5244088655474618  
0.6340693675512187 0.5332039324154172 0.4180473392527225  
0.6576345923255985 0.5610543580125571 0.4904366104556859  
0.5654568952125532 0.3533857986669370 0.4882453325987361  
0.5844882280319096 0.3725356233551060 0.5646953087014355  
0.6768538015982889 0.5427961342976328 0.3994363811024488  
0.7010489734832808 0.5709490948491930 0.4733544260562431  
0.5887293458233025 0.3119833825321605 0.4919837148911900  
0.6086314874895362 0.3317913998054102 0.5698421205299450  
0.6854826551728828 0.5338321434102486 0.3541823638028896  
0.7101289208947570 0.5619509866160701 0.4275162695787152  
0.7340507469402221 0.5893717082220664 0.5011740951309837  
0.5899467295489128 0.2822954085412319 0.4556513911558651  
0.6100456709466638 0.3014046640853087 0.5332111246948091  
0.6301724831622706 0.3220444501388833 0.6103925971213987  
0.5835064230871875 0.4972302895486285 0.5742202336262727  
0.3787031446347083 0.4801827435592221 0.6087075116343557  
0.3591646555355598 0.4399492179394705 0.4742168186593252  
0.4221031489213362 0.6029175255550054 0.4159774999617262  
0.4460740108188330 0.6480651970750491 0.5482092033150298  
0.2523963245224622 0.4180372745136134 0.5709962815497653  
0.3781779647513933 0.7364588092309913 0.4542861522549180  
0.6077578263433667 0.5169681180775185 0.3988635572583014  
0.6491432601708645 0.5664034411509362 0.5254062095268153  
0.5500607730237803 0.3642851309829974 0.4571291911270660  
0.5823079409060644 0.3971279877856144 0.5914236178488718  
0.7406657769085419 0.5751425452149230 0.4125859073726562  
0.6225134975976004 0.2675566776686126 0.5385746649570691



|                    |                    |                    |
|--------------------|--------------------|--------------------|
| 0.3361231756801132 | 0.7222583743917111 | 0.4029366361475161 |
| 0.2178808127772936 | 0.4204936854731400 | 0.5128467509665996 |
| 0.4088627952490785 | 0.6300270275314078 | 0.3582404353814600 |
| 0.3195424638655101 | 0.3987064030122789 | 0.4421753874033925 |
| 0.5427712613051910 | 0.3089921074694396 | 0.4229430731680428 |
| 0.7486357549495268 | 0.5357003482835031 | 0.3582129045463220 |
| 0.6393498081283323 | 0.2481366502630464 | 0.4756074210988785 |
| 0.6018887739364249 | 0.3668639517143039 | 0.6454632569122638 |
| 0.6678140167149600 | 0.2765723742150317 | 0.5875538924897695 |
| 0.7836416749985529 | 0.5729692324539506 | 0.4653881265431760 |
| 0.6953793626895153 | 0.6090768993088128 | 0.5474319636148406 |
| 0.3517064135163003 | 0.4679690374195132 | 0.6669573685176877 |
| 0.2340254021305024 | 0.4549913897764528 | 0.6245702473217922 |
| 0.3555603446987962 | 0.7595597578265159 | 0.5137178062043370 |
| 0.4481751505803658 | 0.7056229784839814 | 0.5794906159851699 |
| 0.6251204508778410 | 0.5262995381345705 | 0.3366584855104439 |

**Ir\*-Cr DMSC**

|                     |                     |                     |
|---------------------|---------------------|---------------------|
| 1.0000000000000000  |                     |                     |
| 30.0000000000000000 | 0.0000000000000000  | 0.0000000000000000  |
| 0.0000000000000000  | 30.0000000000000000 | 0.0000000000000000  |
| 0.0000000000000000  | 0.0000000000000000  | 30.0000000000000000 |

Ir Cr O C Li H  
 1 1 26 36 1 28

**Direct**

|                    |                    |                    |
|--------------------|--------------------|--------------------|
| 0.5065342299982641 | 0.5131533409227402 | 0.5373099919535324 |
| 0.4901312072501051 | 0.4915615083162795 | 0.4638670077197052 |
| 0.3327241535475373 | 0.4726420936044342 | 0.6769155246697584 |
| 0.2814501780902881 | 0.3990044769674419 | 0.4481428669012377 |
| 0.3799160352154897 | 0.6558813682459197 | 0.3502232975982900 |
| 0.4246947079678615 | 0.7203042935148666 | 0.5832097189170522 |
| 0.2267270049177384 | 0.4069392150111695 | 0.4969545298603574 |
| 0.4765919947310002 | 0.5727198095126456 | 0.5250674351985437 |
| 0.4459089800022283 | 0.4894907235225281 | 0.5561532535482951 |
| 0.3443809647215475 | 0.7133957125350924 | 0.3795663543375333 |
| 0.3766071839867732 | 0.7591376296604913 | 0.5432273817997868 |
| 0.4315747067656054 | 0.4684242957333921 | 0.4846812647168579 |
| 0.4623320067579239 | 0.5509251601942707 | 0.4538136423591287 |
| 0.2631945728133206 | 0.4571175374127259 | 0.6584504587523177 |
| 0.5690980028055868 | 0.5338110505308268 | 0.5165736533545788 |
| 0.5387579055000286 | 0.4530191666032178 | 0.5470481321957373 |
| 0.5188538128273056 | 0.4320605306916336 | 0.4771230696615028 |
| 0.5499317638320146 | 0.5158846547134720 | 0.4455947794049473 |
| 0.7332504043921433 | 0.5378632302659251 | 0.3389555794233853 |
| 0.7198107625085215 | 0.6047567883728482 | 0.5472223217946064 |
| 0.7737578298059856 | 0.5909077518778784 | 0.4989578274019686 |

0.5705024291786556 0.2826200839347037 0.4172567358857663  
0.6202027024962418 0.2444124059219203 0.4559091489006886  
0.6539057768829492 0.2895562957813848 0.6193110491730842  
0.6181017847756900 0.3461857518931991 0.6497506452657704  
0.6626836568356442 0.5253894618716533 0.3220801292041307  
0.5654527433244489 0.5210937076478019 0.6209536236628059  
0.5238054008405514 0.5315036392415394 0.6059187619304207  
0.3054062619890227 0.4609601663332278 0.6431908775456171  
0.2709116549024631 0.4124075725279187 0.4898379667671324  
0.3731643901158239 0.6797027448281010 0.3878360732530770  
0.4035067289851733 0.7229846958666425 0.5436477413886992  
0.4597877001155661 0.5791109517729000 0.4858701187822488  
0.4202809741075331 0.4729388620721694 0.5256705241320393  
0.3621794435806140 0.4654749930678569 0.5843700588177001  
0.3453014174412810 0.4415507816709199 0.5084907854951238  
0.4168419337900316 0.6305945041398807 0.4368992891990796  
0.4319140492581907 0.6521301848285626 0.5138590860877456  
0.2879547692368460 0.4354837485251676 0.5668583823177941  
0.3891245643593880 0.7023774288443191 0.4652526381437413  
0.3182786925748079 0.4539875918160403 0.5986676002299245  
0.3010067253472996 0.4296058325477631 0.5213896496612667  
0.3927955228318367 0.6710532526305077 0.4295069584472748  
0.4081185206041167 0.6929271028778433 0.5079642098599073  
0.4361680456596043 0.6219096974969485 0.4785201445127209  
0.3750852138980242 0.4589474307575201 0.5399844988695401  
0.5780876137066088 0.5301070591965770 0.4739548943629843  
0.5381956067249373 0.4243198910385588 0.5140752424933968  
0.6233609320888870 0.5427815712841330 0.4593171647968802  
0.5616068916355034 0.3816053292581379 0.5215207726076631  
0.6355473002354144 0.5342888556302543 0.4150173129531998  
0.6538972468710981 0.5610758487961708 0.4896919835795804  
0.5656811552043199 0.3515382770860996 0.4859753985656133  
0.5806470821081297 0.3723504244677354 0.5632593833097406  
0.6795149744547759 0.5442062838173722 0.3997448061957962  
0.6984152413626035 0.5709199737721272 0.4758890688304798  
0.5891702204191110 0.3105252516164252 0.4917382517220688  
0.6048820971077640 0.3319656579721995 0.5702747304785869  
0.6912724591203773 0.5360577026953868 0.3551355764468916  
0.7109271265217770 0.5625521955837722 0.4306108376500017  
0.7293868395283614 0.5884407272979161 0.5063969782913976  
0.5930105752587664 0.2803016923439471 0.4561377092257041  
0.6086048456734116 0.3008852177780139 0.5342377782733424  
0.6246681653547181 0.3229812821537053 0.6118009092461972  
0.5844450308845422 0.4960618870179658 0.5687435894848014  
0.3861229398825367 0.4814124756469195 0.6066051582093029  
0.3563605912781535 0.4397630214523374 0.4738973547183657

|                     |                    |                    |
|---------------------|--------------------|--------------------|
| 0.4190798648777639  | 0.6046501542737385 | 0.4115203430866565 |
| 0.4456675012389941  | 0.6423331591226619 | 0.5460646471980397 |
| 0.2570316427143544  | 0.4200868613466410 | 0.5785337495870174 |
| 0.3771485457612401  | 0.7360682417049699 | 0.4581115241350376 |
| 0.61105637711158461 | 0.5179546093460830 | 0.3936887164022478 |
| 0.6432271248393256  | 0.5661731626261244 | 0.5240686911615324 |
| 0.5522208295431229  | 0.3615573871011147 | 0.4537293848127422 |
| 0.5771304827256380  | 0.3971498725442424 | 0.5896077074496503 |
| 0.7421281031809419  | 0.5766161610298497 | 0.4180806096607662 |
| 0.6202320434981066  | 0.2670481215462673 | 0.5411671567514025 |
| 0.3323443427331197  | 0.7235981202826508 | 0.4080489242939611 |
| 0.2182801497239291  | 0.4256052792285975 | 0.5222721473522923 |
| 0.4056534432687807  | 0.6365097916669148 | 0.3547877385601513 |
| 0.3138228689329622  | 0.3965156108343331 | 0.4460508771293989 |
| 0.5460803880289811  | 0.3038369608925020 | 0.4207090146075781 |
| 0.7539068653734473  | 0.5362386403534514 | 0.3640575403410632 |
| 0.6425411469677295  | 0.2484892130899092 | 0.4792481493787167 |
| 0.5919092168598055  | 0.3651624534627065 | 0.6463014600643070 |
| 0.6654354958939733  | 0.2795514153264655 | 0.5905449024818757 |
| 0.7810566774261337  | 0.5703856168212128 | 0.4747277521550607 |
| 0.6878933887047111  | 0.6107707276683677 | 0.5489767643816631 |
| 0.3635660038561471  | 0.4698994634030554 | 0.6669180288474964 |
| 0.2430832378163124  | 0.4580730883628940 | 0.6328709892151871 |
| 0.3551864474546688  | 0.7554767639624563 | 0.5189886672179505 |
| 0.4477546156813501  | 0.6974277563913401 | 0.5812561288515808 |
| 0.6323855424917452  | 0.5313649516993897 | 0.3323114032322234 |

**Pt\*-Fe DMSC**

1.0000000000000000

|                     |                     |                     |
|---------------------|---------------------|---------------------|
| 30.0000000000000000 | 0.0000000000000000  | 0.0000000000000000  |
| 0.0000000000000000  | 30.0000000000000000 | 0.0000000000000000  |
| 0.0000000000000000  | 0.0000000000000000  | 30.0000000000000000 |

Pt Fe O C Li H

1 1 26 36 1 28

Direct

|                    |                    |                    |
|--------------------|--------------------|--------------------|
| 0.5047832203954361 | 0.5121187617130405 | 0.5501566233582713 |
| 0.4917666573444828 | 0.4906133442170136 | 0.4675270872819201 |
| 0.3274701499683951 | 0.4729958243256683 | 0.6762436845702973 |
| 0.2804266640449922 | 0.4029123583748735 | 0.4455307787623011 |
| 0.3770656246521514 | 0.6520716476605087 | 0.3505198730629548 |
| 0.4244290240261067 | 0.7220087540747646 | 0.5811909846505169 |
| 0.2249057253259699 | 0.4098587405627483 | 0.4934250429129213 |
| 0.4783101757841312 | 0.5733061918090083 | 0.5251520528887628 |
| 0.4425733659596988 | 0.4891807412635353 | 0.5578360818875990 |
| 0.3408208700640925 | 0.7093531901364508 | 0.3792362054387177 |
| 0.3752010367612152 | 0.7593373052136074 | 0.5414236834044596 |

0.4305765751953891 0.4676696756406363 0.4858520707073042  
0.4627774652141742 0.5506154649826541 0.4545012150148059  
0.2585118742646061 0.4574508469786260 0.6564140332418038  
0.5696484096000443 0.5370982453940202 0.5179719437196990  
0.5339553479283495 0.4488618763376870 0.5505425946486171  
0.5201837623866459 0.4299806610167471 0.4784081157580548  
0.5528591659917546 0.5132511593525880 0.4483115821979287  
0.7329287347689404 0.5363411884733560 0.3392863612311229  
0.7252108904795311 0.5999376954670301 0.5485209595366585  
0.7774698407520969 0.5878075382787812 0.4981239613324437  
0.5722766295088527 0.2860789833693292 0.4153908124853810  
0.6234127936582294 0.2473630229792557 0.4515424367363598  
0.6592281699770535 0.2868304209823821 0.6158304927789989  
0.6233710592655398 0.3415947002845803 0.6490202346166200  
0.6620396861126499 0.5245873997713246 0.3234790702983993  
0.5673402934564162 0.5165921076301225 0.6211119757976258  
0.5253400813150398 0.5317368477808709 0.6050493223008291  
0.3009339784014057 0.4614939153335905 0.6418920768647921  
0.2691761030904520 0.4150961237393313 0.4873180481285316  
0.3705269157175912 0.6765814570945868 0.3876664022542674  
0.4025729370434387 0.7235880981601671 0.5419424979529662  
0.4610865745140992 0.5792702233098072 0.4871098521020956  
0.4183809575358536 0.4730120012533149 0.5271681971920809  
0.3590238235288657 0.4661115766675920 0.5841291113932962  
0.3433205278749737 0.4425833208486366 0.5078091310942942  
0.4161923211697718 0.6294189675451225 0.4367445611080841  
0.4319366926533528 0.6525701535553383 0.5129940047956872  
0.2850053398461501 0.4366438313548572 0.5651400815727928  
0.3874361930988125 0.7012194742237565 0.4642745657557390  
0.3147899163462992 0.4547782795997187 0.5975856902778834  
0.2987152746419534 0.4311316369795515 0.5198572948152341  
0.3911501342519194 0.6693070443555497 0.4290921008699853  
0.4072615192848210 0.6929070136175453 0.5067707318155354  
0.4363282546474069 0.6216859233464671 0.4781415213793664  
0.3725261704230048 0.4595340713835497 0.5397968348528880  
0.5797405312936867 0.5304173000104263 0.4774287552103894  
0.5369550614360108 0.4225312338353119 0.5180052410581896  
0.6252414799650027 0.5421399149674530 0.4611639421665623  
0.5617626546505474 0.3796776203758042 0.5235664139581393  
0.6363674266639024 0.5346593387837887 0.4165482572230981  
0.6570739407693027 0.5584196366579492 0.4914387398737982  
0.5652542559905973 0.3504163257454561 0.4875045782193117  
0.5830704953755510 0.3705286652509154 0.5643238696378756  
0.6803020712494425 0.5436689874134195 0.4006956883530679  
0.7013863865285505 0.5683265890046925 0.4768991176503809  
0.5905077801663777 0.3102996405033397 0.4910947041644468

|                    |                    |                    |
|--------------------|--------------------|--------------------|
| 0.6081044686172179 | 0.3301595342279409 | 0.5694983044082806 |
| 0.6912010301198707 | 0.5351453921245274 | 0.3559860288752192 |
| 0.7125309680132044 | 0.5611543599261102 | 0.4311540406062055 |
| 0.7334075354724158 | 0.5846728915492254 | 0.5069349768883267 |
| 0.5950414223329340 | 0.2821764829061372 | 0.4539438149566521 |
| 0.6111678058905647 | 0.3000289570195996 | 0.5327402228537899 |
| 0.6294173656167992 | 0.3201360480010240 | 0.6100935664542690 |
| 0.5762711861350243 | 0.5562507644304034 | 0.5769436899054963 |
| 0.3827139982405148 | 0.4816388333091493 | 0.6070423586304671 |
| 0.3554392113299274 | 0.4406792681336097 | 0.4735806146692617 |
| 0.4185414837617377 | 0.6031579751228567 | 0.4116687728666572 |
| 0.4461335768890179 | 0.6435586754612457 | 0.5452785124128652 |
| 0.2537004000220298 | 0.4216997620159043 | 0.5759662484625612 |
| 0.3742976588552218 | 0.7343090091686517 | 0.4568256445149226 |
| 0.6108143921574831 | 0.5197077813936006 | 0.3953634044915578 |
| 0.6486404798408717 | 0.5600465462387016 | 0.5267756689283616 |
| 0.5497462754872523 | 0.3609727491574664 | 0.4563194785999335 |
| 0.5818349234073316 | 0.3958059036074155 | 0.5905148669543455 |
| 0.7436342263087904 | 0.5748062523919043 | 0.4182116905620442 |
| 0.6244066831094888 | 0.2666356317804041 | 0.5380356878533212 |
| 0.3289276173565714 | 0.7200220692038293 | 0.4075905918867945 |
| 0.2159759562883207 | 0.4276373991532896 | 0.5191887098647013 |
| 0.4029775777561635 | 0.6329452281348169 | 0.3551540371175685 |
| 0.3128653003450029 | 0.4009262593990049 | 0.4436381649387776 |
| 0.5481369377678199 | 0.3075132096359897 | 0.4196641245524765 |
| 0.7539420513014669 | 0.5346591277695415 | 0.3640962051369719 |
| 0.6457510138276420 | 0.2507423791739293 | 0.4749730950061862 |
| 0.5972971868535114 | 0.3609483274143421 | 0.6465838239092033 |
| 0.6705915477457897 | 0.2777890354172425 | 0.5866927664980456 |
| 0.7844651808417130 | 0.5679765871870200 | 0.4732655222142176 |
| 0.6934235044438017 | 0.6061485829863865 | 0.5511383118468712 |
| 0.3585353497463302 | 0.4705615994652366 | 0.6668801635368248 |
| 0.2385863634954691 | 0.4582031613563449 | 0.6306893895953378 |
| 0.3533057232182860 | 0.7553075961846376 | 0.5176842708720839 |
| 0.4476429759357018 | 0.6993146365816957 | 0.5792555369092459 |
| 0.6318112525075604 | 0.5295909323158888 | 0.3344841786580276 |

**Co\*-Fe DMSC**

1.0000000000000000

30.0000000000000000 0.0000000000000000 0.0000000000000000

0.0000000000000000 30.0000000000000000 0.0000000000000000

0.0000000000000000 0.0000000000000000 30.0000000000000000

Co Fe O C Li H

1 1 26 36 1 28

Direct

0.5034428476504522 0.5161109255966096 0.5446029198435366  
0.4906883450991762 0.4931350064161664 0.4697674194990857  
0.3257189009334941 0.4704410815530082 0.6760280192018288  
0.2823271903981252 0.4001756894222524 0.4450165165067766  
0.3804322392150709 0.6539634922955649 0.3516137785888462  
0.4238638792747428 0.7249914169627982 0.5825168472119783  
0.2258418196897226 0.4066522448864795 0.4918043199637423  
0.4763242777940234 0.5749551013239700 0.5279726602575737  
0.4434485980127517 0.4891091574562536 0.5583929865689046  
0.3441329082561620 0.7120428339064530 0.3786181017935801  
0.3760285701223762 0.7629254534605086 0.5415996121868804  
0.4305193374844008 0.4683116833864382 0.4870330786722333  
0.4627732357465496 0.5530989135703359 0.4570898344480133  
0.2566402367245212 0.4562858400207097 0.6551282130346722  
0.5713071191772416 0.5344273834397715 0.5184565551762906  
0.5391540635665936 0.4527124619056432 0.5495587328422147  
0.5192536221964154 0.4316829288186683 0.4801140919714670  
0.5511536016647454 0.5164797084864419 0.4482254025616677  
0.7316194280675307 0.5360803917284686 0.3365209484375643  
0.7253806324648744 0.6008029810644083 0.5459143500179658  
0.7774995961256852 0.5883960187699208 0.4953834451719648  
0.5703895485451754 0.2847529365970949 0.4177452054742088  
0.6206047466026404 0.2454077465994441 0.4545097368427324  
0.6581115857105353 0.2890692891558416 0.6183892600297946  
0.6236519160516114 0.3461469170215154 0.6494221874778837  
0.6605059041141628 0.5238769698007003 0.3220779841836465  
0.5663737199898538 0.5198670384054060 0.6240778485094136  
0.5269911445700348 0.5285378828767709 0.6036863882741834  
0.2993302527164609 0.4597995122526857 0.6413507958996724  
0.2701346921071968 0.4127335479133951 0.4864027660302847  
0.3730370305065275 0.6788962655342569 0.3882602516223861  
0.4027051915486905 0.7267100648232816 0.5429964437947749  
0.4600435498133573 0.5812473896028122 0.4892394492446703  
0.4186498058150489 0.4729370837701074 0.5279241004386213  
0.3580833038869167 0.4649593643103632 0.5844094881668722  
0.3437162155728937 0.4419204399389276 0.5080403029867675  
0.4166213222163108 0.6315053432481053 0.4389889105039304  
0.4312248207128694 0.6549667968561556 0.5152117996052852  
0.2844740321222908 0.4352931499265601 0.5642080600951220  
0.3884019857847347 0.7037287928599557 0.4652544770077063  
0.3136923780225624 0.4533886454733027 0.5970899702386818  
0.2990145040542310 0.4298024526374954 0.5192473617004393  
0.3923580793575286 0.6715756946004320 0.4304196853711346  
0.4072780278396508 0.6955134705851864 0.5081631679797531  
0.4358432924708154 0.6239508655429280 0.4807358938480265  
0.3724917512627632 0.4589144114171592 0.5405110837104534

0.5795878111153857 0.5302261328377912 0.4766619529665779  
0.5389581528778316 0.4247418177995785 0.5171024385398608  
0.6253172231354913 0.5416763701406074 0.4602788462444634  
0.5635142841295117 0.3818403551711268 0.5232807062732729  
0.6361709467958493 0.5331285066622071 0.4157381643324601  
0.6570456169995834 0.5591325448559450 0.4897001667450993  
0.5670951625755704 0.3523103924382885 0.4874078258881369  
0.5836917709165597 0.3723424252376918 0.5642732733210887  
0.6798464543369888 0.5424356336334458 0.3991697676780118  
0.7013438307547770 0.5684958052432619 0.4747344000081616  
0.5909644720589948 0.3113667464607386 0.4920864013639840  
0.6083697884626621 0.3320300442862652 0.5703474125117048  
0.6902168039452395 0.5343565352641340 0.3541354719854539  
0.7122644572372007 0.5603420902729879 0.4290908083235591  
0.7334561419725677 0.5854842301016853 0.5044199400068815  
0.5938357665587332 0.2815827096664095 0.4559702282648034  
0.6113232745285143 0.3014265172491868 0.5339611067416263  
0.6291106169858952 0.3228092059098827 0.6114180696932205  
0.5811739945057590 0.4969107301527274 0.5689599872367429  
0.3815165772558869 0.4804925721675213 0.6075111832446621  
0.3562270162282989 0.4403262853014090 0.4739091906182026  
0.4194329611611283 0.6048388793419471 0.4143941862212713  
0.4451263949792061 0.6458705916412173 0.5475947051153641  
0.2528915298783712 0.4203697318170206 0.5746665773382856  
0.3757082796616282 0.7369895611818972 0.4573494823523123  
0.6105329753140102 0.5176397850309721 0.3950988311379290  
0.6471104431812190 0.5640853836539370 0.5243484362538540  
0.5524497983990689 0.3627586393326248 0.4557854909342643  
0.5804805191692363 0.3970750567459844 0.5907722013333976  
0.7435099132830388 0.5735646136241260 0.4157276067320683  
0.6239789712676610 0.2677794136316294 0.5400017629109146  
0.3320857633744376 0.7234864036264539 0.4066068350185001  
0.2162308888393286 0.4241807857839383 0.5174937283363302  
0.4054738842479282 0.6340336235684356 0.3575788217829868  
0.3148358434597012 0.3992711623791012 0.4436561967685845  
0.5469669132756002 0.3069890763894823 0.4218140729666720  
0.7531487679221194 0.5347150442362653 0.3608864754744674  
0.6434492029514489 0.2487112424187112 0.4774539698747895  
0.5983621828735244 0.3663372569600998 0.6459997221333299  
0.6685929350592171 0.2785384315078315 0.5894299301830735  
0.7840698031065448 0.5685150713996262 0.4704540863120837  
0.6933292580995118 0.6051627484794452 0.5495239329363247  
0.3568261009352132 0.4678473655002111 0.6667537401236153  
0.2373606925139777 0.4576691633426586 0.6289390053463438  
0.3548444622948198 0.7590809966716019 0.5171940274848509  
0.4465580477129751 0.7016778890169261 0.5812828571041774

0.6305298057022486 0.5289127489108881 0.3337220848430056

**Ni\*-Fe DMSC**

1.0000000000000000

30.0000000000000000 0.0000000000000000 0.0000000000000000  
0.0000000000000000 30.0000000000000000 0.0000000000000000  
0.0000000000000000 0.0000000000000000 30.0000000000000000

Ni Fe O C Li H

1 1 26 36 1 28

**Direct**

0.5061716119006694 0.5161813010319528 0.5488480412357478  
0.4921456570772185 0.4938586436268032 0.4739302419660987  
0.3228002959839556 0.4707627711451723 0.6747889899866434  
0.2907241662440481 0.3993902284040403 0.4422006755423985  
0.3851425514210391 0.6459962799798328 0.3511250898400381  
0.4249618242354564 0.7274564621247642 0.5792405920896136  
0.2323191741264187 0.4047277468409287 0.4867471830712140  
0.4786710371250057 0.5751067595635332 0.5325767893670600  
0.4460955958429696 0.4896117670252924 0.5630517565876476  
0.3480259058421394 0.7048866960648400 0.3752007734142099  
0.3770142834798256 0.7629178674090416 0.5361969361761615  
0.4352980048819778 0.4712811381509485 0.4905432894757834  
0.4653563111383889 0.5501502407838407 0.4625095057536268  
0.2549383234980236 0.4555913700213829 0.6507279063628785  
0.5712564747472293 0.5353218647922040 0.5254494385540378  
0.5408825146594315 0.4546976118379527 0.5547570273227799  
0.5184446445562685 0.4368367002013933 0.4850891349880217  
0.5487270421520437 0.5166943114688244 0.4559741253577374  
0.7234215823864371 0.5361070332679169 0.3367600984387942  
0.7261877726068355 0.6026603837489924 0.5456581496920168  
0.7760511812521631 0.5898784215827242 0.4929555384161725  
0.5609984170451662 0.2898210419125514 0.4160009603159965  
0.6125900745969290 0.2487911809685757 0.4488230141587853  
0.6596859553115230 0.2866252448369172 0.6115491766418976  
0.6272930862446693 0.3427858407261040 0.6464238561168496  
0.6517535271026603 0.5235740981452017 0.3254019028176776  
0.5625966216486642 0.5233383848540374 0.6280467274192972  
0.5217869204994000 0.5325116097099055 0.6117350927839762  
0.2981840760455783 0.4597734365713613 0.6389036289369524  
0.2766447984107757 0.4118919009142756 0.4830495167947458  
0.3769632055646840 0.6723269885848624 0.3866683964409074  
0.4040676784102146 0.7270746294085850 0.5395038599510968  
0.4626679994214158 0.5797702385007505 0.4936342555188364  
0.4222640031076945 0.4744952537321033 0.5314447081250721  
0.3594658567473163 0.4655547008074957 0.5847216838928504  
0.3487433710301102 0.4425311879968840 0.5076237810104027



0.4200029079265044 0.6273597773869704 0.4400690267996152  
0.4334623528266884 0.6543623796258728 0.5154143540379369  
0.2872024221737457 0.4350038749625553 0.5612152525629663  
0.3908750182271761 0.7004946699451094 0.4627416542532874  
0.3146535870478315 0.4535155274125115 0.5953957006284057  
0.3037862182872151 0.4296912938128550 0.5169201998262292  
0.3956145949640639 0.6668717849825173 0.4293790433377550  
0.4093103387437170 0.6943875169705463 0.5062104209082976  
0.4386635633915033 0.6218422942950245 0.4824432594156868  
0.3758303609424757 0.4597519610729213 0.5414830540049604  
0.5781836623085255 0.5311426114733658 0.4833460666107276  
0.5390175646926589 0.4277911555297327 0.5214019687176699  
0.6226270922563631 0.5429254331296740 0.4648420696766871  
0.5620668569558430 0.3840788314680163 0.5246798474619635  
0.6315589311205781 0.5339228904555499 0.4199096304679808  
0.6555530392889983 0.5607966763164713 0.4927368704356205  
0.5630660679365028 0.3556217804046433 0.4876674727212073  
0.5840993833924616 0.3727669897643544 0.5642601269393752  
0.6743865711352084 0.5432515223994940 0.4013698569911339  
0.6990842624010752 0.5701448217618866 0.4757010974035938  
0.5862354902636132 0.3140734157224033 0.4898024683059243  
0.6081975475422263 0.3318261109499065 0.5676902136671920  
0.6827749837427053 0.5345794353412978 0.3560775844126887  
0.7080624265047301 0.5616370043115915 0.4296522879050498  
0.7324290466570648 0.5871874575730693 0.5038792504670725  
0.5865459528453087 0.2853300403386518 0.4527633844739002  
0.6087128400412913 0.3023874916378093 0.5301955482979250  
0.6307652831464964 0.3208981932564175 0.6072902828238249  
0.5830547919505010 0.4979492089664877 0.5755440421995985  
0.3817223175763518 0.4812824980960873 0.6088340502994638  
0.3625117112388786 0.4412898493482100 0.4739814969395807  
0.4230209965872255 0.5996632079711253 0.4166981672453130  
0.4468559414972792 0.6468272098511841 0.5483962462879948  
0.2554962231533027 0.4194723697126425 0.5703130640596283  
0.3781348142644446 0.7333017052139379 0.4531941545540735  
0.6053434466886010 0.5177582697296915 0.4005841924981514  
0.6473030801395505 0.5659895542893640 0.5277782287777080  
0.5473561040122511 0.3672976857269726 0.4570233534544218  
0.5830608841098976 0.3966803765416482 0.5916444615067405  
0.7384695385762039 0.5750971576182320 0.4147331737613499  
0.6207198129651442 0.2682542785571216 0.5346028030997272  
0.3352686627152967 0.7172241262973967 0.4024861981928286  
0.2212052946176433 0.4223847230232270 0.5117267788621228  
0.4105299912679940 0.6268764343899104 0.3581088107449525  
0.3232543263756207 0.3985961602964727 0.4423126521752028  
0.5378334068256881 0.3118297873948927 0.4221419406176373

0.7459274286620139 0.5346955813149417 0.3602284939533490  
 0.6369193642676747 0.2513013336601420 0.4703031262539683  
 0.6014324644551289 0.3624789744864180 0.6452674172353046  
 0.6688394053152976 0.2773333960806844 0.5817180993504868  
 0.7813426898923570 0.5700634746700411 0.4676604968689607  
 0.6944399121209559 0.6080264155537298 0.5502781538189272  
 0.3543249930837596 0.4687514736041843 0.6669231544527799  
 0.2368544601405300 0.4568815809109983 0.6236912169305985  
 0.3558398239521592 0.7575145174823616 0.5120794177068726  
 0.4482023845088167 0.7046678668782929 0.5791232177202600  
 0.6222984957658259 0.5291319338237040 0.3380739925133004

**Ni\*-Pd DMSC**

1.0000000000000000

30.0000000000000000 0.0000000000000000 0.0000000000000000  
 0.0000000000000000 30.0000000000000000 0.0000000000000000  
 0.0000000000000000 0.0000000000000000 30.0000000000000000

Pd Ni O C Li H

1 1 26 36 1 28

Direct

0.4915368092070136 0.4905837589835802 0.4671714110747540  
 0.5066244451245785 0.5109405443381415 0.5462442125763637  
 0.3275209597615433 0.4729704179706397 0.6761772993743430  
 0.2804319891626437 0.4028480615482414 0.4455368846014761  
 0.3770832289934112 0.6521224865079472 0.3505030860480693  
 0.4244809764664784 0.7219861095348457 0.5811082451333981  
 0.2249203666921673 0.4098630024815236 0.4934276038548732  
 0.4788158510695781 0.5732917729282251 0.5259458466023913  
 0.4439770685254931 0.4893236616076634 0.5584500541406594  
 0.3408189129942535 0.7093566975962001 0.3792532930946834  
 0.3752094323573145 0.7593561246445406 0.5413963500381563  
 0.4308054874782145 0.4679598805361668 0.4863904738018280  
 0.4627907617818519 0.5506246808829255 0.4550734138901607  
 0.2585094192309896 0.4574322929349990 0.6563966132336293  
 0.5695460242540595 0.5366126781554483 0.5183685714033782  
 0.5346917232642404 0.4492174105134422 0.5513132499197937  
 0.5200606305439914 0.4302883237048999 0.4789671068261538  
 0.5527540942163212 0.5131538435050113 0.4484336157706049  
 0.7329583423739817 0.5363658858187133 0.3392732180561477  
 0.7251567469327123 0.5999048808266223 0.5485105841377447  
 0.7774713583791355 0.5878141479736337 0.4981133594112437  
 0.5722338424787973 0.2860111454436119 0.4154054233677504  
 0.6234147156051563 0.2473522257771821 0.4515599418246377  
 0.6591845015249682 0.2868349371648832 0.6158072529420090  
 0.6232961021464900 0.3416484261278800 0.6489861289572283

0.6620452341273285 0.5246052564421991 0.3234151666378213  
0.5648826438572172 0.5153825080053662 0.6195847182274351  
0.5239612798960283 0.5321099623633301 0.6046523224501635  
0.3009438915824865 0.4614873292308360 0.6418683959344119  
0.2692584167602227 0.4151066978298042 0.4873456383217307  
0.3705711257093925 0.6765652907524434 0.3877062759931760  
0.4025815054394656 0.7235811525336223 0.5418912810853237  
0.4614699490715780 0.5790337548264854 0.4879595038152502  
0.4195030697351522 0.4735199572205132 0.5280110745604329  
0.3591049204613184 0.4661934023767663 0.5841375519187468  
0.3437392474567152 0.4428313754890360 0.5079115127231177  
0.4163747451140043 0.6292045390091284 0.4369378648648956  
0.4319579779519360 0.6525266242348359 0.5130185329535065  
0.2851567268405213 0.4366336782566468 0.5650526719335491  
0.3875261654410102 0.7011225989498884 0.4642236146557587  
0.3148367396670040 0.4547820624327629 0.5975090522381352  
0.2990232934559005 0.4312248430965983 0.5198389697736241  
0.3912968406364395 0.6691340812281752 0.4291689633638682  
0.4072785296093335 0.6928520437327989 0.5067171516429575  
0.4365318046437221 0.6214992015626757 0.4784521929581167  
0.3730222944312719 0.4598521379335664 0.5400305280386875  
0.5795281205080692 0.5302241772307272 0.4776086249700628  
0.5369671098221021 0.4230472498684445 0.5183186843914068  
0.6249903685521315 0.5421866907079865 0.4613680176896077  
0.5616803988421261 0.3799890560468401 0.5237151273276989  
0.6361716595992359 0.5346630183164661 0.4166569501721337  
0.6569906859360148 0.5584057506428262 0.4914267816648111  
0.5651321557985723 0.3507561224151797 0.4875247681344677  
0.5830080727115371 0.3706183920178888 0.5642548478057581  
0.6801547668425697 0.5436333059844493 0.4007483666728831  
0.7013183981270638 0.5682897533101408 0.4768656542038451  
0.5903863945748830 0.3105324008681039 0.4911133328037925  
0.6080155944438642 0.3302761616217036 0.5694153439005877  
0.6911755098255667 0.5351584106254891 0.3559968391641344  
0.7124709273256111 0.5611117961318259 0.4311016580759363  
0.7333805713298779 0.5846576262298924 0.5069023039499039  
0.5949951678459876 0.2822285210137406 0.4539930193192929  
0.6110569439529990 0.3001838363053643 0.5326656431980852  
0.6293887954607750 0.3201649472729338 0.6100630937634884  
0.5739982045818628 0.5558432882378674 0.5765071988346488  
0.3828708762992748 0.4816091282924799 0.6069552112673399  
0.3555136985613933 0.4407214071892366 0.4735794805906698  
0.4185728469947840 0.6031176128617575 0.4116975479088893  
0.4462010140508549 0.6434456775644948 0.5452344308644346  
0.2536662002401066 0.4217795959815042 0.5759016861020503  
0.3742228959445990 0.7342743843301925 0.4568100392803103

|                    |                    |                    |
|--------------------|--------------------|--------------------|
| 0.6108088802839465 | 0.5197198306325927 | 0.3953318793111225 |
| 0.6485133264337553 | 0.5600745708696971 | 0.5267463303428693 |
| 0.5497169296017687 | 0.3610041216726649 | 0.4562786901674552 |
| 0.5815914497744672 | 0.3958580261785907 | 0.5904701091627338 |
| 0.7436716621140524 | 0.5748064030039393 | 0.4181594346433528 |
| 0.6244640617268394 | 0.2666766328628288 | 0.5380135029758775 |
| 0.3289187026862217 | 0.7200752307198897 | 0.4075858691808530 |
| 0.2159417431867532 | 0.4276151395910973 | 0.5191996599326576 |
| 0.4029448910828787 | 0.6329543863528369 | 0.3551984539891131 |
| 0.3128581193645761 | 0.4009637980625509 | 0.4436575244094174 |
| 0.5481773667112786 | 0.3075084037303557 | 0.4196779910376597 |
| 0.7539522939343523 | 0.5346758828421726 | 0.3640918340737794 |
| 0.6457699793494969 | 0.2507037098829531 | 0.4749827119843777 |
| 0.5972940825525683 | 0.3610805884979713 | 0.6465120960246121 |
| 0.6705727259539460 | 0.2778345711400950 | 0.5866751957469780 |
| 0.7844404315252888 | 0.5679567675403365 | 0.4732744521880205 |
| 0.6933658598792595 | 0.6061154906152528 | 0.5511560571729271 |
| 0.3585980547657163 | 0.4706140278541370 | 0.6668168434189052 |
| 0.2385900228440669 | 0.4582147494578416 | 0.6306796519261926 |
| 0.3532941436510277 | 0.7553204225840425 | 0.5176868924671201 |
| 0.4476282531666441 | 0.6992062235569793 | 0.5792249310259698 |
| 0.6318590921857757 | 0.5295928246025168 | 0.3344667913896052 |

**Pd\*-Ni DMSC**

1.0000000000000000

|                     |                     |                     |
|---------------------|---------------------|---------------------|
| 30.0000000000000000 | 0.0000000000000000  | 0.0000000000000000  |
| 0.0000000000000000  | 30.0000000000000000 | 0.0000000000000000  |
| 0.0000000000000000  | 0.0000000000000000  | 30.0000000000000000 |

Pd Ni O C Li H

1 1 26 36 1 28

Direct

|                    |                    |                    |
|--------------------|--------------------|--------------------|
| 0.5066244451245785 | 0.5109405443381415 | 0.5462442125763637 |
| 0.4915368092070136 | 0.4905837589835802 | 0.4671714110747540 |
| 0.3275209597615433 | 0.4729704179706397 | 0.6761772993743430 |
| 0.2804319891626437 | 0.4028480615482414 | 0.4455368846014761 |
| 0.3770832289934112 | 0.6521224865079472 | 0.3505030860480693 |
| 0.4244809764664784 | 0.7219861095348457 | 0.5811082451333981 |
| 0.2249203666921673 | 0.4098630024815236 | 0.4934276038548732 |
| 0.4788158510695781 | 0.5732917729282251 | 0.5259458466023913 |
| 0.4439770685254931 | 0.4893236616076634 | 0.5584500541406594 |
| 0.3408189129942535 | 0.7093566975962001 | 0.3792532930946834 |
| 0.3752094323573145 | 0.7593561246445406 | 0.5413963500381563 |
| 0.4308054874782145 | 0.4679598805361668 | 0.4863904738018280 |
| 0.4627907617818519 | 0.5506246808829255 | 0.4550734138901607 |
| 0.2585094192309896 | 0.4574322929349990 | 0.6563966132336293 |
| 0.5695460242540595 | 0.5366126781554483 | 0.5183685714033782 |
| 0.5346917232642404 | 0.4492174105134422 | 0.5513132499197937 |

0.5200606305439914 0.4302883237048999 0.4789671068261538  
0.5527540942163212 0.5131538435050113 0.4484336157706049  
0.7329583423739817 0.5363658858187133 0.3392732180561477  
0.7251567469327123 0.5999048808266223 0.5485105841377447  
0.7774713583791355 0.5878141479736337 0.4981133594112437  
0.5722338424787973 0.2860111454436119 0.4154054233677504  
0.6234147156051563 0.2473522257771821 0.4515599418246377  
0.6591845015249682 0.2868349371648832 0.6158072529420090  
0.6232961021464900 0.3416484261278800 0.6489861289572283  
0.6620452341273285 0.5246052564421991 0.3234151666378213  
0.5648826438572172 0.5153825080053662 0.6195847182274351  
0.5239612798960283 0.5321099623633301 0.6046523224501635  
0.3009438915824865 0.4614873292308360 0.6418683959344119  
0.2692584167602227 0.4151066978298042 0.4873456383217307  
0.3705711257093925 0.6765652907524434 0.3877062759931760  
0.4025815054394656 0.7235811525336223 0.5418912810853237  
0.4614699490715780 0.5790337548264854 0.4879595038152502  
0.4195030697351522 0.4735199572205132 0.5280110745604329  
0.3591049204613184 0.4661934023767663 0.5841375519187468  
0.3437392474567152 0.4428313754890360 0.5079115127231177  
0.4163747451140043 0.6292045390091284 0.4369378648648956  
0.4319579779519360 0.6525266242348359 0.5130185329535065  
0.2851567268405213 0.4366336782566468 0.5650526719335491  
0.3875261654410102 0.7011225989498884 0.4642236146557587  
0.3148367396670040 0.4547820624327629 0.5975090522381352  
0.2990232934559005 0.4312248430965983 0.5198389697736241  
0.3912968406364395 0.6691340812281752 0.4291689633638682  
0.4072785296093335 0.6928520437327989 0.5067171516429575  
0.4365318046437221 0.6214992015626757 0.4784521929581167  
0.3730222944312719 0.4598521379335664 0.5400305280386875  
0.5795281205080692 0.5302241772307272 0.4776086249700628  
0.5369671098221021 0.4230472498684445 0.5183186843914068  
0.6249903685521315 0.5421866907079865 0.4613680176896077  
0.5616803988421261 0.3799890560468401 0.5237151273276989  
0.6361716595992359 0.5346630183164661 0.4166569501721337  
0.6569906859360148 0.5584057506428262 0.4914267816648111  
0.5651321557985723 0.3507561224151797 0.4875247681344677  
0.5830080727115371 0.3706183920178888 0.5642548478057581  
0.6801547668425697 0.5436333059844493 0.4007483666728831  
0.7013183981270638 0.5682897533101408 0.4768656542038451  
0.5903863945748830 0.3105324008681039 0.4911133328037925  
0.6080155944438642 0.3302761616217036 0.5694153439005877  
0.6911755098255667 0.5351584106254891 0.3559968391641344  
0.7124709273256111 0.5611117961318259 0.4311016580759363  
0.7333805713298779 0.5846576262298924 0.5069023039499039  
0.5949951678459876 0.2822285210137406 0.4539930193192929

|                    |                    |                    |
|--------------------|--------------------|--------------------|
| 0.6110569439529990 | 0.3001838363053643 | 0.5326656431980852 |
| 0.6293887954607750 | 0.3201649472729338 | 0.6100630937634884 |
| 0.5739982045818628 | 0.5558432882378674 | 0.5765071988346488 |
| 0.3828708762992748 | 0.4816091282924799 | 0.6069552112673399 |
| 0.3555136985613933 | 0.4407214071892366 | 0.4735794805906698 |
| 0.4185728469947840 | 0.6031176128617575 | 0.4116975479088893 |
| 0.4462010140508549 | 0.6434456775644948 | 0.5452344308644346 |
| 0.2536662002401066 | 0.4217795959815042 | 0.5759016861020503 |
| 0.3742228959445990 | 0.7342743843301925 | 0.4568100392803103 |
| 0.6108088802839465 | 0.5197198306325927 | 0.3953318793111225 |
| 0.6485133264337553 | 0.5600745708696971 | 0.5267463303428693 |
| 0.5497169296017687 | 0.3610041216726649 | 0.4562786901674552 |
| 0.5815914497744672 | 0.3958580261785907 | 0.5904701091627338 |
| 0.7436716621140524 | 0.5748064030039393 | 0.4181594346433528 |
| 0.6244640617268394 | 0.2666766328628288 | 0.5380135029758775 |
| 0.3289187026862217 | 0.7200752307198897 | 0.4075858691808530 |
| 0.2159417431867532 | 0.4276151395910973 | 0.5191996599326576 |
| 0.4029448910828787 | 0.6329543863528369 | 0.3551984539891131 |
| 0.3128581193645761 | 0.4009637980625509 | 0.4436575244094174 |
| 0.5481773667112786 | 0.3075084037303557 | 0.4196779910376597 |
| 0.7539522939343523 | 0.5346758828421726 | 0.3640918340737794 |
| 0.6457699793494969 | 0.2507037098829531 | 0.4749827119843777 |
| 0.5972940825525683 | 0.3610805884979713 | 0.6465120960246121 |
| 0.6705727259539460 | 0.2778345711400950 | 0.5866751957469780 |
| 0.7844404315252888 | 0.5679567675403365 | 0.4732744521880205 |
| 0.6933658598792595 | 0.6061154906152528 | 0.5511560571729271 |
| 0.3585980547657163 | 0.4706140278541370 | 0.6668168434189052 |
| 0.2385900228440669 | 0.4582147494578416 | 0.6306796519261926 |
| 0.3532941436510277 | 0.7553204225840425 | 0.5176868924671201 |
| 0.4476282531666441 | 0.6992062235569793 | 0.5792249310259698 |
| 0.6318590921857757 | 0.5295928246025168 | 0.3344667913896052 |

**Cu\*-Pd DMSC**

1.0000000000000000

|                     |                     |                     |
|---------------------|---------------------|---------------------|
| 30.0000000000000000 | 0.0000000000000000  | 0.0000000000000000  |
| 0.0000000000000000  | 30.0000000000000000 | 0.0000000000000000  |
| 0.0000000000000000  | 0.0000000000000000  | 30.0000000000000000 |

|    |    |    |    |    |    |
|----|----|----|----|----|----|
| Pd | Cu | O  | C  | Li | H  |
| 1  | 1  | 26 | 36 | 1  | 28 |

Direct

|                    |                    |                    |
|--------------------|--------------------|--------------------|
| 0.4923549315219967 | 0.4919085815493954 | 0.4709877656391978 |
| 0.5021258784347744 | 0.5091041248086453 | 0.5585401768937825 |
| 0.3260106604753404 | 0.4719889693576256 | 0.6747783410042113 |
| 0.2780486877994235 | 0.4012985158996586 | 0.4447155918663138 |
| 0.3785167175454525 | 0.6505812890739584 | 0.3513129780661802 |
| 0.4246260363110174 | 0.7225746428595742 | 0.5813430180897448 |

0.2225406099437941 0.4081466735339515 0.4925810033927894  
0.4777852183125876 0.5742057048160418 0.5296200985613022  
0.4398617929475033 0.4863792970406999 0.5608500953590212  
0.3420933879904722 0.7079201300204533 0.3795016673372987  
0.3751512457017255 0.7598274989610094 0.5416272253626278  
0.4300657747216697 0.4685278113380809 0.4875820974184145  
0.4642925980135061 0.5514867189283099 0.4581962185624755  
0.2564185764241098 0.4572749717283539 0.6564247435482163  
0.5735883319568250 0.5419906347613179 0.5174274596625378  
0.5393692514689937 0.4508858038664216 0.5521211057127501  
0.5192582252731227 0.4310951657509697 0.4814113875785884  
0.5538044568078642 0.5134661971585177 0.4503477656602237  
0.7344095508632310 0.5365938275473493 0.3368916546281838  
0.7257685035646366 0.5997220468816812 0.5463926492895333  
0.7793128294985238 0.5879414233765125 0.4971029220883065  
0.5718987096304937 0.2855347634705792 0.4151601333779653  
0.6225763141050754 0.2467967151521541 0.4518349239079358  
0.6582344576184632 0.2870784364495043 0.6165949118686772  
0.6224182775531258 0.3429188338800886 0.6483195359920478  
0.6634404201862362 0.5249326277057293 0.3211781601638447  
0.5662026273607477 0.5228746163469580 0.6292697757539349  
0.5263491486077841 0.5368847809684891 0.6110823229804153  
0.2985913738124804 0.4607470269079091 0.6411240348190139  
0.2667741359190690 0.4138114568792063 0.4863773925194014  
0.3717555830728035 0.6751853714906327 0.3882998722521736  
0.4025894270384678 0.7241615774829193 0.5422976192206408  
0.4620431711595289 0.5794732084734677 0.4910940544455893  
0.4170541675125688 0.4722050247726076 0.5284687225801483  
0.3560704255768898 0.4648540100507386 0.5832214555536361  
0.3410432390319100 0.4421607771076606 0.5069167866676570  
0.4172860090690365 0.6285342542031327 0.4386857706481854  
0.4321873423535542 0.6531148725762740 0.5144016732506728  
0.2822157973796434 0.4359661913887664 0.5639482346759519  
0.3878357735495562 0.7005043945018653 0.4646988787186508  
0.3118086240437409 0.4538923745334884 0.5965393019172445  
0.2963131283400788 0.4304678411050591 0.5187860514880159  
0.3920821830200588 0.6681517848874630 0.4300740522750506  
0.4073137622508997 0.6930847337284860 0.5073987464442207  
0.4370792921216760 0.6217607836729698 0.4804054969819413  
0.3701555792526858 0.4586426409973943 0.5392106026478064  
0.5814344214421306 0.5321600755706626 0.4774111298254169  
0.5387070359067389 0.4244574671953201 0.5192783324378801  
0.6269521020745012 0.5426398672903620 0.4592133941358774  
0.5627926509424837 0.3807401582059303 0.5233097881961769  
0.6377441386630519 0.5345034648884177 0.4146787014213568  
0.6590612897589964 0.5590534627547811 0.4888093102460134

0.5662684136158176 0.3518663897385248 0.4868477205400256  
0.5832802919190764 0.3705447871277155 0.5638319901957920  
0.6817416353341347 0.5435132580551704 0.3985536256324604  
0.7034057576028845 0.5684356866025023 0.4743785969552830  
0.5907551041137531 0.3110991999559481 0.4905087255582017  
0.6080132507969824 0.3302041469304527 0.5690381686801987  
0.6926594315878171 0.5353442447847425 0.3536892304061847  
0.7142493923162199 0.5609722976424866 0.4286989742523543  
0.7350457111863984 0.5848159392992762 0.5049271117028916  
0.5947445031128177 0.2821747367137288 0.4537160995931662  
0.6111625227821326 0.3004108441154317 0.5321246985556910  
0.6287597002693642 0.3204492076440548 0.6100636445492186  
0.5759676855222842 0.5520632517182387 0.5761983700910365  
0.3802173821590082 0.4798787666149737 0.6059173860214522  
0.3531823437732206 0.4403495417955046 0.4726626356351086  
0.4200781629829339 0.6018529376984010 0.4141156639250805  
0.4466312511822607 0.6443138788603413 0.5466520918956028  
0.2505039050728621 0.4214623087562642 0.5746097868030025  
0.3740548592429284 0.7333168463427820 0.4567981936702734  
0.6120943226046242 0.5194412736580793 0.3937116728530207  
0.6498717614968988 0.5619168490084887 0.5238454136036946  
0.5513919360083828 0.3624931744174671 0.4554013668834335  
0.5809113342308744 0.3956440464922840 0.5901112098550056  
0.7456643347694493 0.5740053292867827 0.4156403295682542  
0.6246351045544644 0.2669178219843670 0.5372687075111360  
0.3304419648605619 0.7190002026064659 0.4078002482055584  
0.2135060879424919 0.4260657879823943 0.5182086921155985  
0.4041531131851348 0.6311498586648699 0.3561680983451507  
0.3104940617924052 0.3997388405267947 0.4428038947120950  
0.5477372697891579 0.3069667735169025 0.4190966844692271  
0.7553684543141276 0.5351505870548585 0.3617572090286303  
0.6451622111242195 0.2503375726786968 0.4749916849108344  
0.5979286727865101 0.3640150398225973 0.6442773219978292  
0.6693001354691125 0.2773951388064747 0.5875651967240415  
0.7866865282177125 0.5681447015772938 0.4723544288505080  
0.6936610140457664 0.6045375769761228 0.5485898614338396  
0.3568160983528124 0.4702465749423603 0.6643441729703002  
0.2361869770288033 0.4575967180338208 0.6309607291725422  
0.3536684835060523 0.7557527995254459 0.5175364119142112  
0.4471075484972161 0.6990729812748017 0.5795519690673470  
0.6332670503192537 0.5297304652018668 0.3323946268094983

**Pd\*-Cu DMSC**

1.0000000000000000  
30.0000000000000000 0.0000000000000000 0.0000000000000000



0.0000000000000000 30.0000000000000000 0.0000000000000000  
0.0000000000000000 0.0000000000000000 30.0000000000000000

Pd Cu O C Li H  
1 1 26 36 1 28

Direct

0.5021258784347744 0.5091041248086453 0.5585401768937825  
0.4923549315219967 0.4919085815493954 0.4709877656391978  
0.3260106604753404 0.4719889693576256 0.6747783410042113  
0.2780486877994235 0.4012985158996586 0.4447155918663138  
0.3785167175454525 0.6505812890739584 0.3513129780661802  
0.4246260363110174 0.7225746428595742 0.5813430180897448  
0.2225406099437941 0.4081466735339515 0.4925810033927894  
0.4777852183125876 0.5742057048160418 0.5296200985613022  
0.4398617929475033 0.4863792970406999 0.5608500953590212  
0.3420933879904722 0.7079201300204533 0.3795016673372987  
0.3751512457017255 0.7598274989610094 0.5416272253626278  
0.4300657747216697 0.4685278113380809 0.4875820974184145  
0.4642925980135061 0.5514867189283099 0.4581962185624755  
0.2564185764241098 0.4572749717283539 0.6564247435482163  
0.5735883319568250 0.5419906347613179 0.5174274596625378  
0.5393692514689937 0.4508858038664216 0.5521211057127501  
0.5192582252731227 0.4310951657509697 0.4814113875785884  
0.5538044568078642 0.5134661971585177 0.4503477656602237  
0.7344095508632310 0.5365938275473493 0.3368916546281838  
0.7257685035646366 0.5997220468816812 0.5463926492895333  
0.7793128294985238 0.5879414233765125 0.4971029220883065  
0.5718987096304937 0.2855347634705792 0.4151601333779653  
0.6225763141050754 0.2467967151521541 0.4518349239079358  
0.6582344576184632 0.2870784364495043 0.6165949118686772  
0.6224182775531258 0.3429188338800886 0.6483195359920478  
0.6634404201862362 0.5249326277057293 0.3211781601638447  
0.5662026273607477 0.5228746163469580 0.6292697757539349  
0.5263491486077841 0.5368847809684891 0.6110823229804153  
0.2985913738124804 0.4607470269079091 0.6411240348190139  
0.2667741359190690 0.4138114568792063 0.4863773925194014  
0.3717555830728035 0.6751853714906327 0.3882998722521736  
0.4025894270384678 0.7241615774829193 0.5422976192206408  
0.4620431711595289 0.5794732084734677 0.4910940544455893  
0.4170541675125688 0.4722050247726076 0.5284687225801483  
0.3560704255768898 0.4648540100507386 0.5832214555536361  
0.3410432390319100 0.4421607771076606 0.5069167866676570  
0.4172860090690365 0.6285342542031327 0.4386857706481854  
0.4321873423535542 0.6531148725762740 0.5144016732506728  
0.2822157973796434 0.4359661913887664 0.5639482346759519  
0.3878357735495562 0.7005043945018653 0.4646988787186508  
0.3118086240437409 0.4538923745334884 0.5965393019172445

0.2963131283400788 0.4304678411050591 0.5187860514880159  
0.3920821830200588 0.6681517848874630 0.4300740522750506  
0.4073137622508997 0.6930847337284860 0.5073987464442207  
0.4370792921216760 0.6217607836729698 0.4804054969819413  
0.3701555792526858 0.4586426409973943 0.5392106026478064  
0.5814344214421306 0.5321600755706626 0.4774111298254169  
0.5387070359067389 0.4244574671953201 0.5192783324378801  
0.6269521020745012 0.5426398672903620 0.4592133941358774  
0.5627926509424837 0.3807401582059303 0.5233097881961769  
0.6377441386630519 0.5345034648884177 0.4146787014213568  
0.6590612897589964 0.5590534627547811 0.4888093102460134  
0.5662684136158176 0.3518663897385248 0.4868477205400256  
0.5832802919190764 0.3705447871277155 0.5638319901957920  
0.6817416353341347 0.5435132580551704 0.3985536256324604  
0.7034057576028845 0.5684356866025023 0.4743785969552830  
0.5907551041137531 0.3110991999559481 0.4905087255582017  
0.6080132507969824 0.3302041469304527 0.5690381686801987  
0.6926594315878171 0.5353442447847425 0.3536892304061847  
0.7142493923162199 0.5609722976424866 0.4286989742523543  
0.7350457111863984 0.5848159392992762 0.5049271117028916  
0.5947445031128177 0.2821747367137288 0.4537160995931662  
0.6111625227821326 0.3004108441154317 0.5321246985556910  
0.6287597002693642 0.3204492076440548 0.6100636445492186  
0.5759676855222842 0.5520632517182387 0.5761983700910365  
0.3802173821590082 0.4798787666149737 0.6059173860214522  
0.3531823437732206 0.4403495417955046 0.4726626356351086  
0.4200781629829339 0.6018529376984010 0.4141156639250805  
0.4466312511822607 0.6443138788603413 0.5466520918956028  
0.2505039050728621 0.4214623087562642 0.5746097868030025  
0.3740548592429284 0.7333168463427820 0.4567981936702734  
0.6120943226046242 0.5194412736580793 0.3937116728530207  
0.6498717614968988 0.5619168490084887 0.5238454136036946  
0.5513919360083828 0.3624931744174671 0.4554013668834335  
0.5809113342308744 0.3956440464922840 0.5901112098550056  
0.7456643347694493 0.5740053292867827 0.4156403295682542  
0.6246351045544644 0.2669178219843670 0.5372687075111360  
0.3304419648605619 0.7190002026064659 0.4078002482055584  
0.2135060879424919 0.4260657879823943 0.5182086921155985  
0.4041531131851348 0.6311498586648699 0.3561680983451507  
0.3104940617924052 0.3997388405267947 0.4428038947120950  
0.5477372697891579 0.3069667735169025 0.4190966844692271  
0.7553684543141276 0.5351505870548585 0.3617572090286303  
0.6451622111242195 0.2503375726786968 0.4749916849108344  
0.5979286727865101 0.3640150398225973 0.6442773219978292  
0.6693001354691125 0.2773951388064747 0.5875651967240415  
0.7866865282177125 0.5681447015772938 0.4723544288505080

0.6936610140457664 0.6045375769761228 0.5485898614338396  
0.3568160983528124 0.4702465749423603 0.6643441729703002  
0.2361869770288033 0.4575967180338208 0.6309607291725422  
0.3536684835060523 0.7557527995254459 0.5175364119142112  
0.4471075484972161 0.6990729812748017 0.5795519690673470  
0.6332670503192537 0.5297304652018668 0.3323946268094983

**Ru\*-Rh DMSC**

1.0000000000000000

30.0000000000000000 0.0000000000000000 0.0000000000000000  
0.0000000000000000 30.0000000000000000 0.0000000000000000  
0.0000000000000000 0.0000000000000000 30.0000000000000000

Rh Ru O C Li H

1 1 26 36 1 28

Direct

0.4911403181164411 0.4902085259759118 0.4664101505292356  
0.5073335350673326 0.5120559398666743 0.5420080767654832  
0.3274979464371013 0.4730713742372893 0.6762789624055234  
0.2806530253278512 0.4027185500042330 0.4456250707844379  
0.3773364209755484 0.6517856809672280 0.3507149936988928  
0.4245875167325954 0.7220783780389488 0.5813761237990922  
0.2251789583009117 0.4096766337461075 0.4935328123568227  
0.4779412265717800 0.5730789542828898 0.5259318710646345  
0.4445082142209043 0.4888903078685875 0.5581264981450328  
0.3412804280763018 0.7091670628725292 0.3794893882496986  
0.3752868522440952 0.7593926216006932 0.5414376396939964  
0.4304904023184685 0.4676310438185647 0.4863873313860620  
0.4627285087934903 0.5508624248110683 0.4549302961677639  
0.2584262999619819 0.4575741346812927 0.6563943765465530  
0.5696719861184442 0.5352993767628902 0.5181442761957622  
0.5356499734674972 0.4501267365053825 0.5500235301880196  
0.5193942486863443 0.4297958312784146 0.4786553446040485  
0.5529434526151800 0.5130550030042095 0.4480295369250804  
0.7328905684912026 0.5365591169343092 0.3393533255777810  
0.7251223287371406 0.5997787669100526 0.5486603322488364  
0.7774878011579454 0.5878066377039372 0.4981855927818385  
0.5719361985118662 0.2856411565872649 0.4155203750267867  
0.6232784970272272 0.2471279026079073 0.4517418756174805  
0.6586741650906409 0.2871921181439792 0.6159036912789205  
0.6229896755221803 0.3423515298082014 0.6490093011864194  
0.6619769665760592 0.5247750223507184 0.3234259937335818  
0.5632601917930289 0.5196402764742928 0.6220655725751458  
0.5207206255075918 0.5276804613258645 0.6041583643370966  
0.3009088688637318 0.4616249649319718 0.6419969042265257  
0.2694858410415608 0.4151829020861811 0.4873615523873461  
0.3709044202094608 0.6762465356469084 0.3878933539608662

0.4027208912767002 0.7236886584159623 0.5421443040609569  
0.4607733228580690 0.5790059675137801 0.4872013134838014  
0.4193704171148772 0.4728832668913211 0.5274892077889544  
0.3592503570171336 0.4662254537655877 0.5844618115696343  
0.3439604866228000 0.4430506135596786 0.5082735523844342  
0.4165232500040184 0.6290382101181760 0.4374755054341835  
0.4320333735204495 0.6524806030306004 0.5135798959820240  
0.2851080614901395 0.4370235603040048 0.5650678836575985  
0.3876022014982485 0.7008911031928349 0.4645018280807779  
0.3148211316643635 0.4550302896335125 0.5976641259179134  
0.2991258885284340 0.4315641324453183 0.5198662556684719  
0.3914362254203900 0.6688357261863679 0.4294273407917041  
0.4073751257548860 0.6928168763403306 0.5071172748687353  
0.4365006641747805 0.6215078557249994 0.4789795419253297  
0.3732937806383869 0.4597058556750843 0.5404770824936551  
0.5798216824897809 0.5293366693617149 0.4765498320996294  
0.5370202192317041 0.4228289010670302 0.5171755769788400  
0.6251977798717376 0.5418385767901163 0.4615958530036344  
0.5616029956121245 0.3800580339595334 0.5234800843398189  
0.6362937009556991 0.5346590550710141 0.4168685179794065  
0.6570941520447965 0.5582143476740539 0.4916658857339372  
0.5653644338909265 0.3509034193744117 0.4873376164704340  
0.5826346453390719 0.3707720537853318 0.5640931069559116  
0.6801428508717164 0.5437694238530539 0.4007594327805069  
0.7013771565137404 0.5683557028363101 0.4769933312702279  
0.5906730749808148 0.3107431054803297 0.4910048429042723  
0.6078214428342879 0.3306012362343592 0.5693917657514177  
0.6910870475797938 0.5354024573396282 0.3559611313233845  
0.7125219386208486 0.5612239048554897 0.4311577267901111  
0.7334043331425989 0.5848074039188357 0.5069894472670569  
0.5949443277466705 0.2821241849449845 0.4540154187635158  
0.6113487640909712 0.3005161965740336 0.5326348776169307  
0.6289044894504365 0.3206186257780012 0.6101999347483400  
0.5761255956424116 0.5549829654197556 0.5758614249912808  
0.3828467105032257 0.4816885811719439 0.6074175427063694  
0.3559617333498005 0.4411973569969420 0.4740096224299215  
0.4190888892325970 0.6025818380805174 0.4126767768375026  
0.4460895375774678 0.6435442048740982 0.5459150095475124  
0.2536888530185508 0.4218413213852878 0.5758167403169400  
0.3744468822627471 0.7340644953309058 0.4568616445493007  
0.6107058765121237 0.5197487648736338 0.3957978530980835  
0.6488655100475403 0.5598224450786488 0.5270269152301297  
0.5499744175978626 0.3611933396427368 0.4560432791181444  
0.5808509239776278 0.3959342385536115 0.5902909627675159  
0.7436723446657491 0.5749776232509567 0.4181396279540661  
0.6245720081846238 0.2669144817741242 0.5382474289900473

|                    |                    |                    |
|--------------------|--------------------|--------------------|
| 0.3294992607304216 | 0.7196795451393950 | 0.4079581732274283 |
| 0.2163147961513452 | 0.4275256122981252 | 0.5192810986786792 |
| 0.4032429411346631 | 0.6326077311614939 | 0.3552154980375597 |
| 0.3130943298284493 | 0.4009003346154570 | 0.4436192497502763 |
| 0.5480691341097969 | 0.3074051665760436 | 0.4197170518724393 |
| 0.7536391169098561 | 0.5348152949080646 | 0.3643905634762182 |
| 0.6455322523184438 | 0.2509190506764836 | 0.4752411095515227 |
| 0.5974519388745013 | 0.3623047137497015 | 0.6461908907004001 |
| 0.6697534945206343 | 0.2785490280966053 | 0.5864877192251186 |
| 0.7842069583005420 | 0.5678282998138243 | 0.4733532688979325 |
| 0.6933941049417495 | 0.6063930059018068 | 0.5510675878255482 |
| 0.3585328511371889 | 0.4704602827741481 | 0.6668144577257410 |
| 0.2388114047505112 | 0.4581798220212346 | 0.6304152527767317 |
| 0.3535303005524635 | 0.7549915863071101 | 0.5176133951694830 |
| 0.4476604155495432 | 0.6992355886046445 | 0.5793297067918881 |
| 0.6317313856042394 | 0.5297178457257283 | 0.3343841052259260 |

### Rh\*-Ru DMSC

1.0000000000000000

|                     |                     |                     |
|---------------------|---------------------|---------------------|
| 30.0000000000000000 | 0.0000000000000000  | 0.0000000000000000  |
| 0.0000000000000000  | 30.0000000000000000 | 0.0000000000000000  |
| 0.0000000000000000  | 0.0000000000000000  | 30.0000000000000000 |

Rh Ru O C Li H

1 1 26 36 1 28

Direct

|                    |                    |                    |
|--------------------|--------------------|--------------------|
| 0.5064720168970008 | 0.5113456179676291 | 0.5394189066358734 |
| 0.4909370125354268 | 0.4898308137913112 | 0.4645747669662947 |
| 0.3275689937358399 | 0.4730451803882171 | 0.6764250851156810 |
| 0.2808649355369558 | 0.4027729133167668 | 0.4456893777457299 |
| 0.3775009440649255 | 0.6516930433200933 | 0.3509010832408077 |
| 0.4246008012037173 | 0.7221339972420276 | 0.5814871398552344 |
| 0.2254024439715681 | 0.4097655030361607 | 0.4936188756621597 |
| 0.4780219405045518 | 0.5726240710562551 | 0.5260287187290124 |
| 0.4450852382440957 | 0.4887033626153793 | 0.5574252540270953 |
| 0.3414185398238323 | 0.7090226679990732 | 0.3796757374445873 |
| 0.3753288773543015 | 0.7593432647424652 | 0.5415022582929042 |
| 0.4301329632852712 | 0.4677242192137064 | 0.4858556253017532 |
| 0.4627418182052188 | 0.5510246409141857 | 0.4548200483546772 |
| 0.2585740379262659 | 0.4575924238549596 | 0.6563246481628260 |
| 0.5688223251874996 | 0.5352811855820687 | 0.5179793866152314 |
| 0.5351909671205154 | 0.4502385869524862 | 0.5497137874226411 |
| 0.5195686162180139 | 0.4295798128177137 | 0.4783046095133061 |
| 0.5528571297558322 | 0.5129445241233762 | 0.4476492031243596 |
| 0.7328956947147951 | 0.5365569845614764 | 0.3394608733298670 |
| 0.7250175037330376 | 0.5999224556041756 | 0.5486142718307024 |
| 0.7773314802081894 | 0.5877027494145221 | 0.4981882733710246 |

0.5719447447510503 0.2856836291575347 0.4156414848668787  
0.6233013445211378 0.2472730691062564 0.4519093639653304  
0.6586184637012272 0.2873392627492473 0.6158666750247782  
0.6229091386945266 0.3423574723267580 0.6490513206353802  
0.6620111864343279 0.5248182901282389 0.3234242176685462  
0.5629721469430450 0.5174306654872214 0.6219561603726563  
0.5218255965096339 0.5305595400295575 0.6045221432064697  
0.3010887907338090 0.4616729350248501 0.6420230305259934  
0.2697146421285919 0.4151885353541664 0.4874690138945016  
0.3710406302810974 0.6761301457075605 0.3881160946903828  
0.4027556033697088 0.7236282264644783 0.5422479660451238  
0.4607659621081373 0.5789770467656229 0.4871307707289506  
0.4192909710989352 0.4728302385692922 0.5269195874684587  
0.3594998122128401 0.4663607663648309 0.5845527025433845  
0.3440516592251865 0.4430660485272194 0.5082808048997595  
0.4166017824192164 0.6290664219185067 0.4376255794370981  
0.4320740398412391 0.6524557083553501 0.5138622817370013  
0.2853950471518665 0.4370374959605183 0.5651600092946210  
0.3877037144674430 0.7008548124836954 0.4646830718524985  
0.3150860484881625 0.4551004702006189 0.5977130029523662  
0.2993377501335640 0.4315463302224607 0.5199676388783450  
0.3915784635293232 0.6688134931145568 0.4296457340657784  
0.4074277805426067 0.6927429723512397 0.5072623964844140  
0.4365379800889920 0.6215380849488172 0.4792017114086453  
0.3733921179216472 0.4598426175330969 0.5404976106907972  
0.5796103068551840 0.5293298000316595 0.4762803761722288  
0.5369926526407945 0.4227762583864963 0.5168252910364944  
0.6250773819302023 0.5417869641099087 0.4616313778585338  
0.5616938438816597 0.3802594120534438 0.5235197159221621  
0.6362781902262841 0.5346211497328914 0.4168368526961351  
0.6569456471785134 0.5581356190052620 0.4917798001776407  
0.5653785813244335 0.3509614700532461 0.4873750771492489  
0.5826526302985232 0.3710082015140371 0.5641929169590948  
0.6800968512750966 0.5437382007579052 0.4008645834448497  
0.7012060384665214 0.5682228750541033 0.4770383608697665  
0.5905911538400216 0.3107932493653611 0.4910687233975881  
0.6077782035740087 0.3307573451412940 0.5694813542091344  
0.6910766577933990 0.5353803267766511 0.3560693200955913  
0.7124355701275754 0.5611477378098383 0.4312655816670071  
0.7332532836115198 0.5846794894326768 0.5070376426628114  
0.5949528709862164 0.2822044092103577 0.4541327431150763  
0.6112124632508371 0.3006467150773866 0.5327325474890496  
0.6288845172125545 0.3207462776974829 0.6102259413151061  
0.5740765433525149 0.5547335548821936 0.5767132316504502  
0.3831154781621683 0.4817669243278486 0.6075195256056184  
0.3560511951872576 0.4411717623831920 0.4740061874179676

|                    |                    |                    |
|--------------------|--------------------|--------------------|
| 0.4191216223538042 | 0.6026382173466482 | 0.4127604869813014 |
| 0.4460762033247761 | 0.6434931060736209 | 0.5462062545196794 |
| 0.2539921706198673 | 0.4219710942522008 | 0.5759806022581394 |
| 0.3746399325253651 | 0.7340232918863858 | 0.4570369831350330 |
| 0.6108273281985636 | 0.5196845509302722 | 0.3955978970555545 |
| 0.6486678367360246 | 0.5596329058194477 | 0.5271455590867788 |
| 0.5500666741917728 | 0.3612314345551549 | 0.4560570945212533 |
| 0.5807104656511638 | 0.3961539263204783 | 0.5904350811130415 |
| 0.7435167243310287 | 0.5750866557302640 | 0.4183086488086759 |
| 0.6244971145705052 | 0.2671290368274379 | 0.5382824829527024 |
| 0.3296090514744375 | 0.7196360656559722 | 0.4081001133133593 |
| 0.2164888941591704 | 0.4275585353460077 | 0.5193874260246930 |
| 0.4034428409082372 | 0.6325775926819163 | 0.3554026790570480 |
| 0.3133007494516872 | 0.4008615171907585 | 0.4437537097917088 |
| 0.5480200414001507 | 0.3073569361022003 | 0.4198262673016729 |
| 0.7537194122176177 | 0.5348185103759139 | 0.3644408712158450 |
| 0.6456111088817408 | 0.2508930973332897 | 0.4753501769115526 |
| 0.5975131651567263 | 0.3625232384753025 | 0.6462942489194721 |
| 0.6697371476467867 | 0.2785330655202242 | 0.5865499447797613 |
| 0.7840546460813500 | 0.5677612613478589 | 0.4733194831148090 |
| 0.6932248134175508 | 0.6062057769647503 | 0.5511725408738167 |
| 0.3586601490284999 | 0.4704886745511097 | 0.6671525562960079 |
| 0.2389451472584762 | 0.4581773689387504 | 0.6303616913211140 |
| 0.3536014780395254 | 0.7549872002964255 | 0.5176452670171623 |
| 0.4477335882969577 | 0.6993364932373928 | 0.5795992303851795 |
| 0.6317915787787350 | 0.5298124144045602 | 0.3344050270531761 |

**Pt\*-Ru DMSC**

1.0000000000000000

|                     |                     |                     |
|---------------------|---------------------|---------------------|
| 30.0000000000000000 | 0.0000000000000000  | 0.0000000000000000  |
| 0.0000000000000000  | 30.0000000000000000 | 0.0000000000000000  |
| 0.0000000000000000  | 0.0000000000000000  | 30.0000000000000000 |

|    |    |    |    |    |    |
|----|----|----|----|----|----|
| Pt | Ru | O  | C  | Li | H  |
| 1  | 1  | 26 | 36 | 1  | 28 |

Direct

|                    |                    |                    |
|--------------------|--------------------|--------------------|
| 0.5062551050234826 | 0.5111161167225375 | 0.5390606524843155 |
| 0.4905023956081005 | 0.4890832415794792 | 0.4620471948603221 |
| 0.3278861749403413 | 0.4733006816204021 | 0.6764604971691527 |
| 0.2810723427049279 | 0.4026937731094584 | 0.4457356627901781 |
| 0.3780549358368658 | 0.6513289240957245 | 0.3511994663206889 |
| 0.4248651073976442 | 0.7219112434606098 | 0.5819400225529759 |
| 0.2256738519680711 | 0.4098120496409542 | 0.4937843258882857 |
| 0.4774563584512362 | 0.5716973694353458 | 0.5259973316687820 |
| 0.4455716189597435 | 0.4878571289776218 | 0.5570500422088138 |
| 0.3419225923094938 | 0.7086747403896692 | 0.3800746336840222 |
| 0.3757141452557896 | 0.7588427755679370 | 0.5415045961574561 |

0.4297554309104969 0.4675810128000684 0.4849173532042811  
0.4627072648674280 0.5509923520635066 0.4538277624293615  
0.2589987761357532 0.4577877111070014 0.6559504314609983  
0.5678783420648460 0.5354807803049563 0.5181654986153195  
0.5347347929610633 0.4501553590974808 0.5491436340265171  
0.5195427321695565 0.4292304313710068 0.4771768920651309  
0.5526714748553522 0.5125610761840771 0.4472213628011103  
0.7325214007293259 0.5368399452833102 0.3398987955784573  
0.7245186462058366 0.5998563366283848 0.5488638086367439  
0.7767207679531750 0.5875523233945830 0.4982485466725924  
0.5719366903001296 0.2853585717119981 0.4156488324038205  
0.6232036257120979 0.2471352714976298 0.4522555516266538  
0.6579519160154081 0.2881740632833393 0.6159907502864038  
0.6225663508460074 0.3436061957489522 0.6488876168390105  
0.6617163943934362 0.5250402039016553 0.3235423812014432  
0.5627079463396085 0.5171452620325308 0.6223867594895525  
0.5235957474094203 0.5362890935570425 0.6045272989788506  
0.3015776092262692 0.4619467661568419 0.6418705005891974  
0.2699595726366681 0.4151932222173793 0.4875214922937485  
0.3715296023456023 0.6757910234269642 0.3884157404995068  
0.4030839707381952 0.7230871879079858 0.5426172922858601  
0.4604843458559982 0.5782320612821006 0.4864035524571972  
0.4193298264584853 0.4723929581131187 0.5258290995824028  
0.3600663888043342 0.4665285382318304 0.5843458767054349  
0.3442330540957905 0.4431205696801824 0.5080303662312804  
0.4167613830282205 0.6286345460442680 0.4378433236285204  
0.4321938324311179 0.6516709752038468 0.5143561375366542  
0.2858577712893652 0.4372356324711362 0.5651570285050994  
0.3881287472825403 0.7003582393423515 0.4651261141670155  
0.3156762283883412 0.4553369230317675 0.5976112671626062  
0.2996373016982157 0.4316276833512007 0.5199218559959812  
0.3919194420857930 0.6684069549217952 0.4299958090422576  
0.4077684063323169 0.6920734414486628 0.5077480405637914  
0.4365812725436398 0.6209139793986224 0.4794706340960513  
0.3737275908691602 0.4598986639987629 0.5401771083428266  
0.5789924776072098 0.5290277114402300 0.4760098109877291  
0.5366133598501340 0.4226354251077177 0.5155854667396452  
0.6245055731315601 0.5414863727959832 0.4619740377598044  
0.5614405831223075 0.3804791598974738 0.5228986414336163  
0.6358110010220555 0.5343763114973624 0.4171218345554855  
0.6563996134272524 0.5577561064790129 0.4922130878257478  
0.5654425592705037 0.3510970961126614 0.4868136624724457  
0.5821430034663477 0.3715259942739864 0.5638055734713739  
0.6795768252443980 0.5435967368315523 0.4011870428877031  
0.7005949718789818 0.5679372352619797 0.4774100044579564  
0.5905497085465463 0.3109664718615086 0.4909068166817273



0.6073445919100582 0.3314057096831353 0.5693582410471993  
 0.6906624419062815 0.5354615986010889 0.3563587404599002  
 0.7118599061955847 0.5610502621645010 0.4316273898509763  
 0.7326929604677622 0.5844807594644706 0.5072968765524984  
 0.5949185908509619 0.2821230717202122 0.4541809215300533  
 0.6109624573335859 0.3011000436890477 0.5327482200209209  
 0.6283601509239432 0.3216430663546726 0.6101906205203699  
 0.5768006917927408 0.5549514811284667 0.5786189261252385  
 0.3836943611718148 0.4818964938115332 0.6073069056208398  
 0.3561095665082848 0.4412608758210838 0.4737219607498102  
 0.4192161746785881 0.6023154357206829 0.4128962106636098  
 0.4460950979336444 0.6427175954854024 0.5467423887012149  
 0.2545472306158814 0.4221049080102223 0.5761292128151437  
 0.3754953887758749 0.7336933423795311 0.4574807628539447  
 0.6104749070195445 0.5193991392691455 0.3958140563995809  
 0.6483510761413585 0.5590251951349283 0.5276361925690550  
 0.5505378188541725 0.3613871167525002 0.4552921866432749  
 0.5800165998607207 0.3967586397774215 0.5899522741894165  
 0.7427151931767415 0.5754618964531246 0.4186366424983982  
 0.6241659198291127 0.2675932777957619 0.5385008102595743  
 0.3302796717448064 0.7192456136590611 0.4085897592271739  
 0.2168849311401497 0.4276111434942840 0.5195941575958218  
 0.4039538390845296 0.6321593241546010 0.3558041647731536  
 0.3135000884793239 0.4006991583869424 0.4438013961078719  
 0.5478383745536287 0.3068358960111691 0.4198238746359673  
 0.7532685309845846 0.5350170989985713 0.3649277156477289  
 0.6455410086545244 0.2509376409222208 0.4756439406156276  
 0.5973564770734612 0.3640082366715626 0.6460440216821278  
 0.6688539549897061 0.2791999738822670 0.5866355165404000  
 0.7833141845661811 0.5675562173062884 0.4733921191116870  
 0.6927806039010536 0.6064780193989828 0.5513315311298005  
 0.3590434017275167 0.4704388502093261 0.6675109209398812  
 0.2395346554913918 0.4584498438235439 0.6298600977543858  
 0.3540707885954801 0.7542747282948417 0.5176169937779547  
 0.4482259811289138 0.6993267018189548 0.5803073342650141  
 0.6314330743360793 0.5300956297282267 0.3343097738645043

**Ir\*-Pt DMSC**

1.0000000000000000

30.0000000000000000 0.0000000000000000 0.0000000000000000  
 0.0000000000000000 30.0000000000000000 0.0000000000000000  
 0.0000000000000000 0.0000000000000000 30.0000000000000000

Pt Ir O C Li H

1 1 26 36 1 28

Direct

0.4906096643441186 0.4892829411774367 0.4638283922340452  
 0.5071931100351268 0.5123182594313737 0.5423126511993679

0.3279808160256124 0.4733190151606900 0.6763401288008966  
0.2811825187427353 0.4028843426375683 0.4454307324374440  
0.3777137050935628 0.6513464293304476 0.3507443960960895  
0.4248075855234989 0.7215700345730744 0.5816166767603177  
0.2259335358690132 0.4100609836596218 0.4935908099040815  
0.4776603482984067 0.5726280716715298 0.5263981981654495  
0.4451449584120399 0.4887547049586763 0.5582459028608550  
0.3417027218471308 0.7085891920845014 0.3798338762678752  
0.3756331115263503 0.7585438449642006 0.5413137893559481  
0.4304119909707475 0.4675584200123704 0.4856762129464257  
0.4628298396548091 0.5504882600229367 0.4543075132213751  
0.2590886904648709 0.4577100087205310 0.6559173914546145  
0.5687078517265513 0.5356614431314406 0.5188147533191788  
0.5351752933103561 0.4498669010126626 0.5501257293254930  
0.5192474452523542 0.4296441122800721 0.4776760449742374  
0.5524875995270419 0.5125434439759742 0.4476925757641882  
0.7322683997928546 0.5366271685151958 0.3400172086103644  
0.7243953493974108 0.5997904677393900 0.5487471102926421  
0.7766141157235591 0.5874533455326765 0.4981755529119524  
0.5719972052326513 0.2855249395174748 0.4151788371821457  
0.6232219754858344 0.2474629704544534 0.4519677909702132  
0.6580127721814871 0.2879711839996060 0.6156428253197863  
0.6225627487296456 0.3432681032312674 0.6487338276550227  
0.6615500753877956 0.5248413765354061 0.3235587948834554  
0.5630709072910256 0.5159113944584137 0.6213587542328357  
0.5238316812466317 0.5364453828785926 0.6041418711686378  
0.3016559460803847 0.4618648627384359 0.6417907426382686  
0.2702256638540986 0.4153910252999610 0.4872628336185776  
0.3712997076731043 0.6756417728251743 0.3880846902693625  
0.4030649831821795 0.7228346999973041 0.5422872390204504  
0.4608883649774504 0.5784614107104561 0.4874543478688495  
0.4198149253520731 0.4730819044229626 0.5275038451323946  
0.3600006993784053 0.4664348724128645 0.5843984519119366  
0.3445708720511453 0.4432594671183913 0.5078694590784081  
0.4167574643899816 0.6283342779065658 0.4373590652014761  
0.4323216747424883 0.6517194842490376 0.5137858258123539  
0.2859217050877606 0.4371461146660188 0.5649353408257280  
0.3880791087466684 0.7002357880058000 0.4646602581581635  
0.3156655462380688 0.4552112500131455 0.5975551384821475  
0.2999031265818941 0.4317016048637119 0.5196711170489886  
0.3918633125032750 0.6681927350533167 0.4295352966247363  
0.4077970450017211 0.6920052048321709 0.5072945109201085  
0.4367093891723171 0.6207527232573771 0.4789957685711959  
0.3739241698132266 0.4600131364202969 0.5402263064836869  
0.5790716893148696 0.5293717553715982 0.4772591106483434  
0.5368030397549477 0.4230477096672488 0.5169852532980213

0.6241908818568904 0.5417123039762093 0.4620011882801742  
0.5612695837946859 0.3805309728006627 0.5228594813204209  
0.6353131878187966 0.5343521061529692 0.4171251341229850  
0.6561839745136964 0.5580813618372823 0.4922379862390719  
0.5651214904633738 0.3512725475846464 0.4866004402415922  
0.5821384552092439 0.3713695944120013 0.5637128099641735  
0.6792147405048794 0.5434456662678105 0.4011645391769640  
0.7004253936056072 0.5679902446228672 0.4773762453467407  
0.5902991364765153 0.3111052627851862 0.4905789054749978  
0.6073015780689544 0.3312564661599231 0.5691761154842405  
0.6903949151914367 0.5352611120658393 0.3564440195743100  
0.7116031920299353 0.5608968618522907 0.4315719027040779  
0.7325719252305808 0.5844610628078815 0.5071818932268327  
0.5948274287448010 0.2823789768711378 0.4538425641352404  
0.6108026000007605 0.3010146875036004 0.5324032423607875  
0.6283768911652093 0.3214535982900087 0.6099206513479043  
0.5775084305047422 0.5557514284867008 0.5800878742471215  
0.3836052686869232 0.4817864047231599 0.6073889144251388  
0.3562675772740218 0.4413691418817192 0.4735055765764291  
0.4189293486519127 0.6020805246059806 0.4123099132860121  
0.4463135921866566 0.6427596763383381 0.5461220484120287  
0.2547459180996700 0.4216876963918533 0.5758318183982816  
0.3755107212565424 0.7335834223340558 0.4569589173449331  
0.6101197631157779 0.5192377084704165 0.3957633401404990  
0.6482634026889476 0.5590360191501660 0.5276956266067262  
0.5502355637799352 0.3614326528874314 0.4550480464778492  
0.5801516083371058 0.3966218389821582 0.5898549768821311  
0.7424124857212242 0.5753151778648352 0.4184870485750555  
0.6236189773784020 0.2673771983066462 0.5381737495922994  
0.3301100160639335 0.7191954606025336 0.4083660245768896  
0.2172078558327087 0.4277716636018372 0.5194992609934369  
0.4038012677274119 0.6324171208895548 0.3550755821815829  
0.3135581141197701 0.4004671355511258 0.4435367038528111  
0.5476796986562541 0.3067230880421146 0.4193571466035761  
0.7530565071731923 0.5348887500674373 0.3650380516383913  
0.6454358041069885 0.2512463273112181 0.4754818034577568  
0.5971469359544014 0.3633978964266902 0.6460333323613954  
0.6690427326888193 0.2791497229779503 0.5862834618791130  
0.7831857398245973 0.5675101657445543 0.4732615157713460  
0.6926423514334712 0.6063715824773981 0.5511242067009435  
0.3591189518359679 0.4704429892654559 0.6673646872765544  
0.2396195785371984 0.4583919921049642 0.6298321715294476  
0.3539774388405036 0.7540779225510564 0.5174141238268523  
0.4482254372854602 0.6990671031763875 0.5799139779113548  
0.6312887299727846 0.5300928296298455 0.3342478083454171

Zn\*-Y DMSC

1.0000000000000000  
30.0000000000000000 0.0000000000000000 0.0000000000000000  
0.0000000000000000 30.0000000000000000 0.0000000000000000  
0.0000000000000000 0.0000000000000000 30.0000000000000000

Y Zn O C Li H  
1 1 26 36 1 28

Direct

0.4876564272242785 0.4850545793003683 0.4465662357125175  
0.5035234428152979 0.5108814175450500 0.5582456982150171  
0.3264876423006817 0.4727514436444836 0.6762972216724610  
0.2788303568444728 0.4020860016038390 0.4456875440194060  
0.3769613726086007 0.6524084377235774 0.3508674367016225  
0.4244085278403348 0.7222024210416994 0.5818240977396960  
0.2230069265587186 0.4093824168823202 0.4933055284756337  
0.4765661414267298 0.5700533812048817 0.5239646163705777  
0.4419777536226425 0.4860613822685236 0.5591049592808285  
0.3406946659604221 0.7097865673840718 0.3796325254780818  
0.3752780879196518 0.7594742997988492 0.5416528792623806  
0.4295943568786080 0.4674798436840909 0.4871009163743015  
0.4624861878928341 0.5521307922848622 0.4522874570080237  
0.2571612021640677 0.4574609390343451 0.6569790264718404  
0.5718228482361960 0.5375694775806525 0.5183554847816747  
0.5339182338087887 0.4493784556689759 0.5490739053234707  
0.5189008441465843 0.4285597852651974 0.4783825493108949  
0.5537338667232398 0.5144230556751289 0.4495521158855207  
0.7340443446133113 0.5365020921027768 0.3386847468418369  
0.7264227517061732 0.6002024820466866 0.5482025609308302  
0.7791115450282322 0.5881579143894313 0.4980609491427285  
0.5727152933377885 0.2848353429086977 0.4155783413669004  
0.6238298803135562 0.2463164811358977 0.4521065997833423  
0.6585978186516729 0.2871843379725452 0.6162951487251211  
0.6230676629505091 0.3426035185271697 0.6491244630284080  
0.6629444596666829 0.5249389806527537 0.3231524306904970  
0.5688296424824140 0.5177196756405069 0.6228530185935942  
0.5293426459635087 0.5418129416983575 0.6074884972193898  
0.2995455129255893 0.4612226904135043 0.6422314698816840  
0.2673613888947819 0.4146409830682041 0.4874373640740040  
0.3704421407851598 0.6769841249138507 0.3881061549400283  
0.4027129047679915 0.7237227097621524 0.5424634388326978  
0.4600817025821898 0.5790039737590396 0.4862777272447881  
0.4170530856957924 0.4716180564139852 0.5281182520527684  
0.3571052261271109 0.4653911707811049 0.5844384694201749  
0.3415385027491696 0.4422778930354419 0.5080792431374560  
0.4160235019139184 0.6298658389296011 0.4372495348384376  
0.4318362437491359 0.6526165961280576 0.5135990751443114

0.2829778528564889 0.4363680796520548 0.5653036017256990  
0.3873532366959577 0.7014660159293646 0.4648565251550699  
0.3129015301846876 0.4543553902434474 0.5978366568793646  
0.2968714145821875 0.4308823118884866 0.5199788659161200  
0.3910368581440828 0.6696564076118205 0.4295667705089809  
0.4073090369220527 0.6930077336900914 0.5073736205698897  
0.4360238937864195 0.6219049787776513 0.4787361913042318  
0.3708523266968367 0.4588897094973104 0.5403282933419933  
0.5816583237328443 0.5312664051900654 0.4779243546160639  
0.5367922502602082 0.4218927105849983 0.5172212962824049  
0.6269197044608256 0.5428640127242859 0.4612522442037709  
0.5620338639225757 0.3795800491479471 0.5233093362581253  
0.6377219210076188 0.5352257293156223 0.4165404387174920  
0.6589623164773668 0.5591192225250030 0.4910855736888627  
0.566022222371080 0.3502726850595909 0.4871112777491414  
0.5828618730570617 0.3704468814882119 0.5640698216751644  
0.6815998107856075 0.5441033079448443 0.4003745180769984  
0.7031315477746727 0.5688733054188329 0.4763743945906975  
0.5912596938279605 0.3101151808296247 0.4910320791809534  
0.6080752861509394 0.3303713889535202 0.5695922153942015  
0.6923328891437279 0.5355241566344631 0.3556066423458773  
0.7141496427800016 0.5615661423404180 0.4305758288844396  
0.7349710198889742 0.5852458114251270 0.5065793703286294  
0.5956484969632139 0.2814257804988413 0.4542436017558171  
0.6117288667832513 0.3000870023046373 0.5328675741115756  
0.6290102618495744 0.3206802105475078 0.6104125192145619  
0.5806689757812649 0.5549916250037040 0.5777782904254348  
0.3809535373414331 0.4806998201571780 0.6072124243934716  
0.3534131482381161 0.4404344053714448 0.4737557013084459  
0.4183774663324263 0.6037207933074900 0.4121016584679769  
0.4462448183139430 0.6434493503165385 0.5457266396657443  
0.2517939283663143 0.4209729870625171 0.5762683091509505  
0.3745409162562308 0.7347932086394356 0.4574221838359643  
0.6121818643993370 0.5202543868954000 0.3954238775986488  
0.6503366153119647 0.5609495260874638 0.5263424481298452  
0.5509729509265987 0.3603604092331708 0.4556101794102955  
0.5806792990394722 0.3957055326552874 0.5901908111971330  
0.7452438320475809 0.5753257143632856 0.4174347913636643  
0.6246747949474902 0.2664912727243838 0.5386659235941896  
0.3290197289812035 0.7204323728726461 0.4080941524940896  
0.2141459778190297 0.4269888788778566 0.5192248916487511  
0.4032460969862048 0.6337813929622538 0.3553947911350372  
0.3112458875691346 0.3997133692950137 0.4442967103249342  
0.5482308893711978 0.3057833042354828 0.4200854646982336  
0.7550010404612691 0.5348952880940582 0.3635530456883274  
0.6462615101871115 0.2499078560802907 0.4754235586975528

0.5980286011139015 0.3631679725261244 0.6460770955813701  
0.6696495123551044 0.2783215755440357 0.5869703506412401  
0.7858300102366137 0.5682520884166095 0.4731849499245010  
0.6944910071884716 0.6056744275037675 0.5509096352980341  
0.3574623413085831 0.4701494960654569 0.6666865588870251  
0.2374447429490775 0.4580502215360372 0.6310874601926363  
0.3536345070077823 0.7550505051358161 0.5177483974036724  
0.4476899913718377 0.6995625781516496 0.5800987168842774  
0.6329043703421950 0.5307685371244742 0.3342074643095031

**Mo\*-Re**

1.0000000000000000

30.0000000000000000 0.0000000000000000 0.0000000000000000  
0.0000000000000000 30.0000000000000000 0.0000000000000000  
0.0000000000000000 0.0000000000000000 30.0000000000000000

Re Mo O C Li H

1 1 26 36 1 28

**Direct**

0.4924407540916796 0.4917831983775221 0.4715346866182101  
0.5045941831870878 0.5113874421489616 0.5404358978957784  
0.3265488723721849 0.4727201320078664 0.6760815641813294  
0.2790356782743314 0.4020960313652748 0.4453986559145351  
0.3766985219257788 0.6524900743618879 0.3503167741138083  
0.4240486309830346 0.7226672098716801 0.5811803237148785  
0.2234531232719727 0.4095347336722662 0.4931886577374402  
0.4757637378014316 0.5735060352931353 0.5269224811144415  
0.4427941949056222 0.4882098339159634 0.5583126434823055  
0.3404718021582681 0.7097147129438004 0.3792246442447756  
0.3746399049086732 0.7600448461951896 0.5414469293725038  
0.4307019614710215 0.4679268467624823 0.4870324339761644  
0.4637114960994416 0.5513426829432770 0.4561914496531134  
0.2573191903665688 0.4575735754584561 0.6564807432074347  
0.5701389471798980 0.5358509370104987 0.5182034505000114  
0.5344576810374216 0.4485194106222671 0.5510042787796551  
0.5201483033704025 0.4304588537329693 0.4795357634920950  
0.5529345435901469 0.5140149298472011 0.4487720420358588  
0.7333987433364222 0.5364933849272997 0.3390900515601593  
0.7258325070398485 0.6001641292695579 0.5483042642857515  
0.7783365759284960 0.5878150544652311 0.4980905428678500  
0.5726052492058457 0.2849847532061065 0.4152777254038202  
0.6238582570989942 0.2465089838144139 0.4517248786837138  
0.6590887179560199 0.2869169155484728 0.6161649904819829  
0.6233186401431647 0.3421939991290688 0.6489838316605735  
0.6624427081634097 0.5249575749437065 0.3232383648058728  
0.5711016926105177 0.5222629926609740 0.6264639024468370  
0.5312951927035114 0.5269898724036225 0.6004325662584888  
0.2997190497828630 0.4612388234427690 0.6419061284523818

0.2677859691277499 0.4146377861705104 0.4871510649628033  
0.3702769617243091 0.6769888877630488 0.3875599805217627  
0.4021573186936962 0.7244501817748026 0.5419313879965370  
0.4596298502200066 0.5808603919387898 0.4878066527781312  
0.4168844807961798 0.4720280223603751 0.5280022130494045  
0.3575761551061953 0.4653557582067065 0.5843288643332681  
0.3421100390845644 0.4421693327279668 0.5077950687392810  
0.4160522110476355 0.6300529417791879 0.4368968680658773  
0.4313717345912151 0.6536903379177754 0.5133122881715815  
0.2834345292099347 0.4362994796609909 0.5649793248946794  
0.3871117766464136 0.7019580526571283 0.4640460341415984  
0.3133000069094282 0.4542957286348717 0.5975666882693287  
0.2974091482837953 0.4308038420789482 0.5196784501992961  
0.3909988892291875 0.6698017017935525 0.4290005698244890  
0.4068423948546904 0.6938664040519154 0.5067258747033474  
0.4358833011181932 0.6226799112062094 0.4786443887059636  
0.3714497254507620 0.4588403057238003 0.5401587674353262  
0.5811396703477437 0.5307003655421939 0.4768829765155265  
0.5374305105329474 0.4211493626611155 0.5184296706755285  
0.6259233045525747 0.5427223783596878 0.4613284455537906  
0.5617620050369245 0.3789390588200894 0.5236721311972387  
0.6368653010831704 0.5351594507196772 0.4165345951857548  
0.6580086009080267 0.5589270545998449 0.4914128501298858  
0.5656801319994199 0.3500420027896174 0.4871425452039110  
0.5826964259287606 0.3696136924560366 0.5643803456907307  
0.6807735500092009 0.5439857456701715 0.4005389362098948  
0.7022504769229749 0.5686728845481063 0.4766336176591183  
0.5909959941428814 0.3099354691744727 0.4908847921558183  
0.6080549834401100 0.3296729435133723 0.5695788950437685  
0.6916350497884050 0.5354717821449951 0.3557899837460354  
0.7133002335642025 0.5614067829348146 0.4308321562438185  
0.7342531398878405 0.5849975987786542 0.5067249936553995  
0.5954751371928236 0.2814315734323468 0.4539296596049957  
0.6116108108180901 0.2996546906133679 0.5326196753119723  
0.6292736806419928 0.3201297594913969 0.6103179113626708  
0.5830931176851316 0.5529237285955397 0.5777032676672272  
0.3812430152935112 0.4807562995174149 0.6072021717137004  
0.3539507229382568 0.4405172582692063 0.4734673397351304  
0.4183400287458358 0.6036194913433836 0.4120427274875401  
0.4453049012558160 0.6446783875548678 0.5456499461511239  
0.2522716892742700 0.4208318920994341 0.5758882099330688  
0.3744438697928879 0.7352321371797740 0.4562453991469760  
0.6114179281857645 0.5200080123723365 0.3954589879201976  
0.6499675246909643 0.5602288032567674 0.5268163467847820  
0.5508172882195685 0.3605810351414619 0.4556936326772393  
0.5806712802848695 0.3948235307443320 0.5905107007517268

|                    |                    |                    |
|--------------------|--------------------|--------------------|
| 0.7442110438494199 | 0.5755122028142310 | 0.4176723609046331 |
| 0.6245737999560756 | 0.2660199730414262 | 0.5381764914287609 |
| 0.3289379969234827 | 0.7204059098218346 | 0.4077333914766751 |
| 0.2147488429349191 | 0.4271288622141977 | 0.5191625427224084 |
| 0.4029449689414645 | 0.6337485339825611 | 0.3546145937347622 |
| 0.3114608584192332 | 0.3997427851816615 | 0.4437488874152581 |
| 0.5482342935704501 | 0.3061256442842514 | 0.4196663652981750 |
| 0.7542369897471811 | 0.5349569281403207 | 0.3640719952280678 |
| 0.6460440132456967 | 0.2501775987425538 | 0.4752439256658998 |
| 0.5981755716192273 | 0.3626878369847765 | 0.6458583256832353 |
| 0.6699313107353410 | 0.2779350766393001 | 0.5868115562698140 |
| 0.7849815975546789 | 0.5679237674642327 | 0.4731686865020518 |
| 0.6939868242828801 | 0.6063401606415638 | 0.5507797722433819 |
| 0.3575782455624429 | 0.4697015174516160 | 0.6666725585431025 |
| 0.2376434690082685 | 0.4581135624716785 | 0.6305665346669772 |
| 0.3529942606753267 | 0.7557220078646403 | 0.5175256632059928 |
| 0.4474278923530859 | 0.7001205754232681 | 0.5790436255214970 |
| 0.6322539377978219 | 0.5302788560562286 | 0.3342024374403147 |

#### Rh\* -V DMSC

1.0000000000000000

|                     |                     |                     |
|---------------------|---------------------|---------------------|
| 30.0000000000000000 | 0.0000000000000000  | 0.0000000000000000  |
| 0.0000000000000000  | 30.0000000000000000 | 0.0000000000000000  |
| 0.0000000000000000  | 0.0000000000000000  | 30.0000000000000000 |

Rh V O C Li H

1 1 26 36 1 28

Direct

|                    |                    |                    |
|--------------------|--------------------|--------------------|
| 0.5089783561142950 | 0.5114135607851998 | 0.5412294001803877 |
| 0.4925806509738823 | 0.4910659308125151 | 0.4704651223089417 |
| 0.3293406398220317 | 0.4732888890021628 | 0.6811381874126503 |
| 0.2832702702758352 | 0.4047761828486501 | 0.4496538976029160 |
| 0.3790469702963504 | 0.6514782592892679 | 0.3551715924642167 |
| 0.4262469019219150 | 0.7245279858315700 | 0.5849900698080891 |
| 0.2273972408109069 | 0.4116950093476029 | 0.4971669207202543 |
| 0.4792394489389634 | 0.5731464289673366 | 0.5301581608459679 |
| 0.4475315935554994 | 0.4896354181054527 | 0.5617286186300031 |
| 0.3424743008888028 | 0.7089287762771136 | 0.3831064257115815 |
| 0.3755863357601767 | 0.7601253924420333 | 0.5451172067089262 |
| 0.4327859702799562 | 0.4689109905818601 | 0.4907290046904564 |
| 0.4648151149276774 | 0.5516497413150312 | 0.4597710057512412 |
| 0.2601367704798135 | 0.4590612771797872 | 0.6604121740287897 |
| 0.5695454020620021 | 0.5342009925764565 | 0.5203068254048004 |
| 0.5372799162380424 | 0.4514369111503172 | 0.5528998049380796 |
| 0.5199985275720527 | 0.4314111351171175 | 0.4822992342389122 |
| 0.5520538929949167 | 0.5133467098563768 | 0.4499383114409297 |
| 0.7342319669918302 | 0.5380351863770846 | 0.3431303403971631 |



0.7228053268759840 0.6000063319313864 0.5530023422032897  
0.7757219587143902 0.5891572363207082 0.5030749952768802  
0.5733439909029576 0.2866247931904402 0.4187400598684149  
0.6241132969487517 0.2478722638943811 0.4554475422309368  
0.6592850127751715 0.2889502034254951 0.6199998126849755  
0.6233494238960813 0.3444575881641044 0.6523004688624264  
0.6635565184944131 0.5254696717027961 0.3265869942231945  
0.5304953249783232 0.5404605870157183 0.6144777120810895  
0.5367387831502087 0.5841881079309278 0.6257222573528628  
0.3027987845468357 0.4625594924260564 0.6464237435928787  
0.2717470222319119 0.4171971056983848 0.4913658035870283  
0.3720361161091195 0.6761832765372777 0.3921041315090703  
0.4038793767709584 0.7251012002662981 0.5459212763215527  
0.4616532487751207 0.5803137134076318 0.4910149035779405  
0.4211285359743304 0.4737523168504346 0.5316455273049471  
0.3614223935030788 0.4671799501319918 0.5892563310569167  
0.3459460426019378 0.4447905419926976 0.5126228823719107  
0.4171447024298547 0.6295327450621112 0.4419882622171030  
0.4332575224506447 0.6538822962843405 0.5178903644534562  
0.2870369936428968 0.4388078267616004 0.5692904547592696  
0.3884144555615626 0.7016414428709625 0.4686223256304288  
0.3168837253084460 0.4562320913496379 0.6021875581359711  
0.3011352392546537 0.4334534473153550 0.5240597414372828  
0.3922565332592521 0.6692428367981013 0.4337970004454725  
0.4084756314013601 0.6939596150201244 0.5112084243407823  
0.4374545617838234 0.6224052370579151 0.4835085004267793  
0.3753317677949343 0.4610801957842742 0.5450858280233989  
0.5795123507784928 0.5291570808780807 0.4788994701723226  
0.5384829711169874 0.4235902131432337 0.5201893093269625  
0.6249197627174679 0.5416835234935642 0.4641003021282883  
0.5627849723451158 0.3811592093148504 0.5266094759244029  
0.6367477811117985 0.5340944283224900 0.4195713810344772  
0.6557658361548838 0.5587161525035810 0.4947576066589928  
0.5667597056365740 0.3520734436833348 0.4903068335047571  
0.5832733151849103 0.3717125678276683 0.5674973924647287  
0.6807075453768237 0.5439569467132119 0.4042275421962657  
0.7002012098020345 0.5689522086856329 0.4807566495890777  
0.5917382490388999 0.3117628401677747 0.4942419804156994  
0.6084379357490500 0.3315976739833568 0.5729495785205050  
0.6923129091241991 0.5361368107115939 0.3595029384782528  
0.7122291704289632 0.5618240068007406 0.4351588520194319  
0.7315999480168107 0.5855411403425359 0.5113697636023899  
0.5961210829948732 0.2831092739304057 0.4574046926062654  
0.6120494666780002 0.3015115732189499 0.5361068592990071  
0.6294627506115363 0.3221256410021312 0.6137690515876564  
0.4880210037586682 0.5799672664934556 0.5914171872126185

0.3852090341248139 0.4818940158772472 0.6124828498090422  
 0.3581371089339545 0.4431615961171207 0.4784115617372344  
 0.4193585732692700 0.6028345955838922 0.4174085352516417  
 0.4478741424886223 0.6463278393667058 0.5502642872834768  
 0.2555686527240525 0.4237893338079528 0.5799648595020981  
 0.3757653665434872 0.7348798024478966 0.4607449038986922  
 0.6119344283995967 0.5184896302166747 0.3980803389804310  
 0.6453021840160258 0.5616844320996542 0.5294443703679782  
 0.5520631220352960 0.3626689194687269 0.4587788410337883  
 0.5810903808105981 0.3967902371240785 0.5937477836663787  
 0.7434913241261335 0.5758541396288509 0.4226497496606690  
 0.6252542400483304 0.2679890991533495 0.5417425286075443  
 0.3307871642443426 0.7201283565165814 0.4113502370811761  
 0.2182794437116147 0.4292670696799525 0.5229992184635326  
 0.4052570205984594 0.6328649522541088 0.3600717858822632  
 0.3156840804233118 0.4024115925554407 0.4483072920712285  
 0.5491488615852694 0.3079371960527016 0.4230701717928789  
 0.7549273534128332 0.5360848557944249 0.3681618196269271  
 0.6465747433305191 0.2514325267104424 0.4787388853531656  
 0.5977752186085755 0.3643186125892225 0.6490379367765289  
 0.6702689414509608 0.2796222581594099 0.5908030857935105  
 0.7827057858584109 0.5702404395007525 0.4775056820875563  
 0.6906077581959977 0.6027564505443560 0.5567458342285936  
 0.3603567852781861 0.4691328041333450 0.6722106750433249  
 0.2407775990439705 0.4606175600239147 0.6342867223527103  
 0.3534245395506319 0.7546518906954758 0.5218976333100205  
 0.4526047697347345 0.7057160943221263 0.5818531025495567  
 0.6333087147839813 0.5304719605715441 0.3374881962187667

**Pd\*-Cr DMSC**

1.0000000000000000

30.0000000000000000 0.0000000000000000 0.0000000000000000

0.0000000000000000 30.0000000000000000 0.0000000000000000

0.0000000000000000 0.0000000000000000 30.0000000000000000

Pd Cr O C Li H

1 1 26 36 1 28

Direct

0.5061188555834808 0.5141914033806795 0.5502917051379489  
 0.4923147054953976 0.4934267734383466 0.4737170553099341  
 0.3206240639522757 0.4695287052668017 0.6742918091147422  
 0.2822327218626751 0.4007408202484521 0.4418777624851159  
 0.3820368333341467 0.6478478502128000 0.3529798088186908  
 0.4214381888843283 0.7274538086513634 0.5818729693216219  
 0.2248020772867761 0.4079545539282987 0.4874927651379392  
 0.4742283148358629 0.5757918055527361 0.5343947968913556  
 0.4411983377990866 0.4830561917096929 0.5638219277850532

0.3439828005530379 0.7058221695559784 0.3778707945667919  
0.3738245490977733 0.7635126884316822 0.5390232413819582  
0.4318167785933207 0.4701881876867126 0.4898098001085209  
0.4652892285776067 0.5525944772948641 0.4627562660356108  
0.2520354115461555 0.4552320783390879 0.6519362200361692  
0.5776373258848345 0.5389081393954882 0.5217533262401916  
0.5420463009083430 0.4520131751523586 0.5553645271919384  
0.5203078037083450 0.4344230806779621 0.4849586256196650  
0.5524476183902288 0.5165562398295405 0.4543954901788201  
0.7292067229469186 0.5345756653007505 0.3332538282752702  
0.7308487411155978 0.6019560837689442 0.5414016798957596  
0.7812868402589820 0.5887044156482900 0.4892786140037289  
0.5691159093475225 0.2882143261002262 0.4156449714807857  
0.6196571910175328 0.2478500917138118 0.4508638171724056  
0.6570067178424639 0.2836530111332504 0.6165531785871557  
0.6252091285648763 0.3415855077322084 0.6487124550242700  
0.6573713011823469 0.5239566301325767 0.3206952621239885  
0.5666784981988489 0.5239902193776810 0.6400213775337428  
0.5301581386718481 0.5405885143347580 0.6191898178131767  
0.2950118143575645 0.4587514407953123 0.6390498339126538  
0.2693047260330529 0.4134311137755743 0.4830469350090342  
0.3735966047624005 0.6736946740743575 0.3888062211578661  
0.4007699020559274 0.7275524390875420 0.5420094940241426  
0.4602493832511825 0.5810088952135198 0.4945815287872370  
0.4179647684469545 0.4710838329233111 0.5305373857656547  
0.3552272633239326 0.4632430113603122 0.5837368626978620  
0.3428566444886930 0.4416206499856170 0.5065448675262034  
0.4173780343061053 0.6288321862704170 0.4415810960184854  
0.4303772293262128 0.6551973270020724 0.5172400662708592  
0.2819742587641141 0.4349276901846275 0.5612015380716211  
0.3876259411079081 0.7015050197395711 0.4649550066058256  
0.3103735094220738 0.4523548211344570 0.5951428130297900  
0.2976785564800632 0.4298879049023775 0.5165748039693794  
0.3925774101556961 0.6682019056293803 0.4313401132059086  
0.4060916653147754 0.6952072125111793 0.5084050374356017  
0.4359216166848319 0.6230461815331567 0.4839412615555455  
0.3708767328865538 0.4575955042534954 0.5401510900086880  
0.5828693579742277 0.5321858936411193 0.4799491138432035  
0.5406738262113425 0.4258130039094069 0.5216584855059195  
0.6272961769521679 0.5430631253188865 0.4602290162214336  
0.5644337606254569 0.3822292996854387 0.5250709417944958  
0.6361708773157856 0.5338966709188486 0.4153559632842205  
0.6605814737333663 0.5605062885530903 0.4879911627989990  
0.5666649216476621 0.3538335238761226 0.4880640336943328  
0.5854050221160705 0.3710162380424811 0.5651750840864229  
0.6793568909556490 0.5426372831150014 0.3970719099139406

0.7042743526840141 0.5692866648958930 0.4713367357978600  
 0.5901621932904975 0.3124085366101980 0.4908724624561112  
 0.6090214614246747 0.3298920061192989 0.5695647898392932  
 0.6881932517169554 0.5339265428690166 0.3518634981523042  
 0.7132134240893983 0.5605198449965214 0.4254011407947047  
 0.7375087570624989 0.5861771336276714 0.4997386712513807  
 0.5927576274216415 0.2839010745024451 0.4536911214510417  
 0.6107248703625853 0.3005397828182290 0.5321143798028195  
 0.6296186310312484 0.3188283146407285 0.6102517413366229  
 0.5834355644004720 0.5260966198830084 0.5813824896094284  
 0.3783290662318662 0.4779186841304951 0.6076948064236799  
 0.3560870098628436 0.4405336850199560 0.4726576913014101  
 0.4207471519671536 0.6014132041129997 0.4179093304600306  
 0.4437472126518316 0.6474493923589405 0.5501737965550301  
 0.2499281312634758 0.4202378068757284 0.5705661727025446  
 0.3745336664438869 0.7342419400268907 0.4556876937174530  
 0.6098683075465580 0.5180213611385099 0.3958550467719647  
 0.6525228557453749 0.5654733423856573 0.5230729827350968  
 0.5516793677279018 0.3653738450561256 0.4570008649775221  
 0.5838660465080626 0.3954539486047730 0.5920794906777668  
 0.7439204155330007 0.5735379909602785 0.4106409452139427  
 0.6229005662165930 0.2664430320755418 0.5366800917295556  
 0.3314873403767882 0.7177860322382603 0.4054417235229346  
 0.2149856600013090 0.4253903750623905 0.5131734955413134  
 0.4076543839278154 0.6289428378592935 0.3597702571631743  
 0.3147301211003607 0.3990033855595887 0.4414770108839598  
 0.5451262839739197 0.3095770567701428 0.4207416860058487  
 0.7511811507010979 0.5331911802189022 0.3572448744988574  
 0.6427486149433236 0.2506091427652553 0.4736609397811358  
 0.6011981553633252 0.3633157190264872 0.6454629318944655  
 0.6670639590046914 0.2730509995006058 0.5874897590750334  
 0.7872166905154800 0.5676238472219823 0.4651845314054373  
 0.6991949730445544 0.6083781332313332 0.5452182638500047  
 0.3519372509743045 0.4671176733839733 0.6657153602627741  
 0.2332448274927772 0.4568642396831112 0.6254184676202190  
 0.3525223763687934 0.7584101293321311 0.5149587846057220  
 0.4446960363718081 0.7046868345068403 0.5817138029482777  
 0.6279324139167077 0.5303399168320989 0.3330143865156265

**Cd\*-Mn**

1.0000000000000000  
 30.0000000000000000 0.0000000000000000 0.0000000000000000  
 0.0000000000000000 30.0000000000000000 0.0000000000000000  
 0.0000000000000000 0.0000000000000000 30.0000000000000000  
 Cd Mn O C Li H  
 1 1 26 36 1 28

Direct

0.5055249473801751 0.5148832192988099 0.5648928000138866  
0.4912054985015377 0.4913679387641973 0.4670438973416811  
0.3190993005783764 0.4691912774013666 0.6778364434482972  
0.2790117107974948 0.4011274626535832 0.4454295718556341  
0.3759776396972689 0.6542434952158941 0.3485771045648640  
0.4245768059517536 0.7213442857545820 0.5796322427507539  
0.2222556566446052 0.4075270781053729 0.4918274682065975  
0.4757201273973468 0.5716623961928430 0.5213558216292955  
0.4376808304078709 0.4859496508259386 0.5682138940695143  
0.3397694055578599 0.7113312456454998 0.3778593380679846  
0.3755397642603435 0.7594365043359292 0.5402700658544690  
0.4301790327896295 0.4702377716927915 0.4946560906960953  
0.4614730341978132 0.5511713984408495 0.4501409731656769  
0.2502229576914032 0.4546581632577493 0.6564764091741515  
0.5783539873266782 0.5396919727910364 0.5246529096378736  
0.5349585361566335 0.4472446015589220 0.5472958051072120  
0.5195365890300191 0.4290947983154358 0.4755601014960442  
0.5552432819277240 0.5174849614607711 0.4568529667295110  
0.7323067311173359 0.5361589431081375 0.3373640730601635  
0.7331599356121985 0.6021844832759550 0.5457672446060016  
0.7839565911126535 0.5889714587126924 0.4939226822123693  
0.5730307751853473 0.2816067661815066 0.4141634112693650  
0.6237541967681633 0.2436181421784339 0.4517216146190693  
0.6576881605129768 0.2871246805966593 0.6156604506565646  
0.6231256290132731 0.3441856323112564 0.6462810905112458  
0.6607185921521679 0.5250769601651216 0.3243690039271914  
0.5763818704021694 0.5211600049287575 0.6312944616577394  
0.5399861269015030 0.5495667604130495 0.6172685765537878  
0.2929458798595949 0.4586417352736410 0.6429139908092325  
0.2666441567935284 0.4135165827191268 0.4868467311678825  
0.3692782578376504 0.6782609658618797 0.3859723107427528  
0.4024821343720916 0.7233565285331544 0.5405730949367569  
0.4590059486795336 0.5784793533567665 0.4830017595170776  
0.4155073742773577 0.4725311351675170 0.5344840731962686  
0.3524249620421485 0.4641780299627798 0.5871717801195450  
0.3403451222666938 0.4422972117921245 0.5101107189587269  
0.4143528419849281 0.6299679283830335 0.4346077514117922  
0.4306091886528092 0.6519862425056424 0.5109007649037405  
0.2794440770688972 0.4352185118727229 0.5648259912818262  
0.3864829126327449 0.7016243162629259 0.4629115649373087  
0.3077758911960402 0.4527548515781057 0.5987373771099513  
0.2951629366934192 0.4301988032139495 0.5201394300591321  
0.3897023391180824 0.6701478979759745 0.4273943039753552  
0.4064067066627693 0.6927077234270820 0.5051862298979913  
0.4345006657457179 0.6215607448692718 0.4757529340457595

0.3682102400928718 0.4586842345345800 0.5437038747763022  
0.5847384309328090 0.5330274295725075 0.4832204759394935  
0.5370927396448752 0.4214249718793411 0.5138126728024136  
0.6298419232761074 0.5438921807949160 0.4640852705447311  
0.5625506118120001 0.3786333994635062 0.5197635323067491  
0.6387830006051196 0.5355963421997698 0.4190904653073081  
0.6632564010634228 0.5604499512814739 0.4920852774866472  
0.5668129003742042 0.3490881805914411 0.4840350490405652  
0.5829747023339380 0.3698049753080911 0.5607738239968053  
0.6820719155968903 0.5441835164367712 0.4008979348986264  
0.7069299275545116 0.5697945987990453 0.4754726288420047  
0.5915792410537298 0.3086411307797032 0.4888691964840218  
0.6080752882182752 0.3298025169835261 0.5671680867971520  
0.6911811111873314 0.5354273838160503 0.3557352626618037  
0.7158509766267906 0.5618394524504194 0.4294389750295048  
0.7401360115534216 0.5864434024121929 0.5041281074230807  
0.5958742033508992 0.2789853018981073 0.4528166888272521  
0.6115796080454264 0.2990666994134806 0.5309736177215585  
0.6287907895662878 0.3208311123120514 0.6083981179356431  
0.5909929754104146 0.5544275793534205 0.5831051255897302  
0.3755170484674454 0.4790536794045975 0.6110263263763128  
0.3536372163956030 0.4407752280997441 0.4762576000853485  
0.4165979919792724 0.6038688129301687 0.4093929263475325  
0.4452667017867226 0.6424684201260779 0.5428521116815582  
0.2474945079634849 0.4203881379003817 0.5742694126707041  
0.3735550291513989 0.7349812390260019 0.4559667257437232  
0.6122069034252217 0.5205517790349983 0.3992857943678306  
0.6559929136866546 0.5633755047298044 0.5275683651086895  
0.5521077656180271 0.3591420452367189 0.4523287965638336  
0.5800824363997653 0.3952810169028505 0.5865747467023261  
0.7466430144324295 0.5748804461227418 0.4149286900452076  
0.6248636891286016 0.2656377799234342 0.5371195163940565  
0.3283231425087592 0.7219682330285717 0.4064309994775019  
0.2123955756019726 0.4252399091163789 0.5173076827811545  
0.4015904220279046 0.6347586183573148 0.3533718944317578  
0.3114493378511019 0.3990865221599122 0.4444579810744484  
0.5489730832687100 0.3032080414316666 0.4179532414077364  
0.7542529967417019 0.5343541628863594 0.3613672002101679  
0.6463027674181783 0.2477421452269577 0.4748329705942563  
0.5991344882560347 0.3658395160636416 0.6421395719281138  
0.6681356525315990 0.2762076589153089 0.5868595627306749  
0.7898407410100241 0.5685061749618537 0.4693139010635717  
0.7015041680977334 0.6088952244475417 0.5490396573858868  
0.3502585978865601 0.4670383944332809 0.6685607742387054  
0.2310784466121047 0.4557803923143282 0.6302135611353517  
0.3534922956227353 0.7555645737951177 0.5166367951421794

0.4475815281721375 0.6984259044461393 0.5775806903340709  
0.6310790721024354 0.5308074706922005 0.3364287784117931

**Ru\* -Cu DMSC**

1.0000000000000000  
30.0000000000000000 0.0000000000000000 0.0000000000000000  
0.0000000000000000 30.0000000000000000 0.0000000000000000  
0.0000000000000000 0.0000000000000000 30.0000000000000000

Ru Cu O C Li H  
1 1 26 36 1 28

**Direct**

0.5060486593742873 0.5113605602704696 0.5395180491948578  
0.4916202571133489 0.4906863027377561 0.4673944663211720  
0.3271455209720276 0.4729422654465951 0.6765834845086017  
0.2806944855047552 0.4025022917432954 0.4457699409363107  
0.3776575525633112 0.6516536424568466 0.3510802356377675  
0.4243826414542920 0.7225092718960235 0.5817463047184429  
0.2249921679831304 0.4095935796975348 0.4934920186726200  
0.4772532359597307 0.5728475751381161 0.5262315341640774  
0.4444420056714231 0.4884490205232035 0.5578142917316972  
0.3413755431769286 0.7090929174497658 0.3796100769904478  
0.3752605800411738 0.7597614076612560 0.5415773543110556  
0.4301639479202177 0.4681151162075718 0.4863686090042272  
0.4629958615881697 0.5513595707653899 0.4552143277648775  
0.2581260813597877 0.4576474435303503 0.6564211633154857  
0.5694899573154831 0.5355896356313660 0.5178005355471076  
0.5355121951571467 0.4497764962540617 0.5491266209623150  
0.5194149148638715 0.4294394671108020 0.4781359439513740  
0.5532956767881140 0.5129909643779813 0.4479673950974450  
0.7333963705034068 0.5368767043925424 0.3390476223630529  
0.7252691558314324 0.5997466267434989 0.5485560297320653  
0.7777749464537806 0.5877624248959287 0.4982368031844926  
0.5722397596298845 0.2848527218699544 0.4155983435125901  
0.6235533495487261 0.2464644014015526 0.4519988198417062  
0.6582380582120748 0.2877444148334589 0.6163873738229714  
0.6227184445839568 0.3433699621417346 0.6488409618513061  
0.6624768712131928 0.5251980563957536 0.3231200617390263  
0.5617013820784515 0.5204134051025523 0.6238374316770096  
0.5205030766288138 0.5267954488661577 0.6026703596087177  
0.3006519534782273 0.4615569734934762 0.6421492495819027  
0.2693365363567995 0.4149617217092639 0.4874906638365045  
0.3710683564218667 0.6763058112347878 0.3881423976820816  
0.4026045141006475 0.7239825755043114 0.5424242642631171  
0.4603513927013337 0.5795355296474658 0.4873861359739813  
0.4186633724576337 0.4727494862023860 0.5274195930396858  
0.3589968923905444 0.4660866410535801 0.5846784125512098

0.3435806375142630 0.4428900225923476 0.5083243375310120  
0.4164374432486531 0.6293862445583221 0.4376839855221800  
0.4317425168396302 0.6527586326442399 0.5140345656100335  
0.2849139370749523 0.4368856194812181 0.5652365643651891  
0.3876554229009223 0.7012171169334606 0.4647716646025061  
0.3146087307566963 0.4549014981627437 0.5978578651951734  
0.2988687434752497 0.4313309528565272 0.5200359179784592  
0.3915005261077107 0.6691518569761444 0.4297088187219410  
0.4072508446171552 0.6930942574786126 0.5074601098279828  
0.4362284421026505 0.6219217213305155 0.4792991139029703  
0.3728395452579809 0.4596356916769101 0.5405976414377029  
0.5803785656703198 0.5294939005625116 0.4762853290208539  
0.5372405858198215 0.4222037740313069 0.5165316787831387  
0.6257207848520815 0.5417370092453837 0.4612885943335368  
0.5618237920287156 0.3797624282540372 0.5228829210527973  
0.6368344259027922 0.5345864122575010 0.4164794234826431  
0.6575775485087955 0.5579465626810640 0.4914905365088020  
0.5658179513481676 0.3505671505459751 0.4867084660164024  
0.5824127941960709 0.3706927078150870 0.5637516266249358  
0.6806612400074892 0.5438284941742045 0.4005459733569650  
0.7017862590021393 0.5681671260277738 0.4768354702822414  
0.5909260186425055 0.3103399609975144 0.4908466285495676  
0.6076714262449434 0.3306479117541398 0.5693699669889363  
0.6916128216749892 0.5356204892836630 0.3557308088169588  
0.7129571039138520 0.5613029616633586 0.4309991539813015  
0.7336943240843479 0.5846400384280803 0.5069386618852147  
0.5952664475722111 0.2814859536884329 0.4541104186902433  
0.6113261850120223 0.3004340109759546 0.5326933280283594  
0.6286144062080319 0.3211249658952015 0.6102854656708820  
0.5752726730556448 0.5536343930730736 0.5765267446830168  
0.3827305119354675 0.4813691782253756 0.6076077573183865  
0.3556095044554324 0.4411234441574326 0.4740420577406567  
0.4188670981929527 0.6029165194792983 0.4128591481704237  
0.4456682059708834 0.6436934508106056 0.5463862143081417  
0.2534383540373920 0.4219355016882604 0.5760191206957059  
0.3748261635521335 0.7344656480817829 0.4570469863309708  
0.6114449223969453 0.5195775284996049 0.3952060922911655  
0.6492091534801929 0.5592950896082385 0.5268363336366216  
0.5509717594964118 0.3609412336564332 0.4551714263550112  
0.5799828843990569 0.3959378747800081 0.5898294444179232  
0.7438809357424990 0.5755897715100761 0.4180150156768203  
0.6247272669933404 0.2670069916846199 0.5383613707497334  
0.3297952362526901 0.7197856032192872 0.4081013819707257  
0.2161728905018736 0.4272761565303321 0.5193689672753390  
0.4036070361967949 0.6325961893716234 0.3557791437418573  
0.3131344726537057 0.4006112468896656 0.4440378931897506



0.5481489198421250 0.3063124104441864 0.4199158187488883  
0.7542484838910417 0.5351447020758016 0.3639961617018685  
0.6458812479951201 0.2501709874964049 0.4754048725579157  
0.5976061330893617 0.3638209093335725 0.6455924420516607  
0.6692219514202763 0.2786293961859049 0.5871282021122076  
0.7846249104859899 0.5677821950849716 0.4734454064447879  
0.6935667214217738 0.6065877378808062 0.5507874147449766  
0.3582157586798962 0.4702530630587026 0.6672870951136158  
0.2385660483012481 0.4582539061494809 0.6304163296753458  
0.3534949270577949 0.7553392026562201 0.5177765651874272  
0.4476292973434278 0.6998385573042808 0.5798622141359265  
0.6322809865753697 0.5302372120382495 0.3341282439129217

**V\*-Os DMSC**

1.0000000000000000

30.0000000000000000 0.0000000000000000 0.0000000000000000  
0.0000000000000000 30.0000000000000000 0.0000000000000000  
0.0000000000000000 0.0000000000000000 30.0000000000000000

Os V O C H  
1 1 24 36 28

**Direct**

0.4925603176010846 0.4918095719645753 0.4709435768138157  
0.5062659241432452 0.5110370875574799 0.5349829706223492  
0.3278251277869071 0.4733987509553779 0.6764090260385655  
0.2809354918541715 0.4026380671964138 0.4456273625156476  
0.3773680103513942 0.6517823557496222 0.3506980965639130  
0.4248195825698852 0.7217224499442982 0.5815703630757136  
0.2253539383097919 0.4096350143837653 0.4935606905422066  
0.4781769869090086 0.5726823297802165 0.5251789152571242  
0.4452403933558329 0.4893185499800043 0.5571427762970056  
0.3411573024837166 0.7092966600377396 0.3793070678456339  
0.3755350113760470 0.7591245386350300 0.5417143829422685  
0.4316726517142806 0.4681984218056690 0.4864440800478924  
0.4637750999722642 0.5503463471570381 0.4550204183356717  
0.2587659507378164 0.4576176769298939 0.6564453116479484  
0.5684793038059426 0.5342794799559752 0.5175635787529452  
0.5354396386401707 0.4507354905017850 0.5497595561286982  
0.5196052900387196 0.4310649779699446 0.4791525000492040  
0.5515944498763475 0.5130414537477225 0.4476620647473671  
0.7328599530800061 0.5369215460115108 0.3393718092317951  
0.7239114636781000 0.5999325258536299 0.5489552405669144  
0.7764190662249799 0.5880535225146249 0.4985972670329326  
0.5718746251774159 0.2858966008600407 0.4154801578313563  
0.6230684264754697 0.2472144892386371 0.4517996508323179  
0.6587281977361831 0.2873091950105765 0.6162011268944203  
0.6229953217759400 0.3426820449821728 0.6491031358644295

0.6618421513225142 0.5249299777729123 0.3234928302954506  
0.3012267810524106 0.4618554637126315 0.6419868380877801  
0.2696725988635885 0.4150878154675114 0.4874144825555624  
0.3707495413067140 0.6763905968127019 0.3878340128329651  
0.4028646340546695 0.7233152000819171 0.5423161206932486  
0.4606616008444203 0.5796654340180321 0.4861160833465887  
0.4187573146950636 0.4727206334666449 0.5270549286612416  
0.3594109649297904 0.4662987115087474 0.5844751739236360  
0.3439615351034951 0.4428197738923411 0.5080639343513031  
0.4163340964469739 0.6292769812227396 0.4369227879512355  
0.4321032752200923 0.6524770931529682 0.5133514834997335  
0.2851998191030847 0.4372459855401888 0.5651257041346444  
0.3872422224288845 0.7008871464617549 0.4646742058442892  
0.3150335041266825 0.4552491418237253 0.5977453422909645  
0.2991957890198370 0.4314858244254186 0.5198664019549568  
0.3911637887973607 0.6690321505776730 0.4293396378220245  
0.4072887869701657 0.6926447421528050 0.5071992348823939  
0.4365214257070912 0.6217135282123578 0.4784261832210072  
0.3733306284006642 0.4596823847989602 0.5403465474959854  
0.5794662692257948 0.5292639207844796 0.4759495577757085  
0.5375639005541608 0.4223174540244413 0.5171036058194427  
0.6246634381003235 0.5416733418753624 0.4613163483045421  
0.5617042784809814 0.3800707696563116 0.5236446685871029  
0.6360579505271263 0.5341832539378408 0.4166115444203653  
0.6561134564773506 0.5582166049654065 0.4917875981059588  
0.5653798529469077 0.3508959703811413 0.4873087754235444  
0.5827160466968385 0.3706496016532331 0.5643803150054642  
0.6800309198091561 0.5433143216121468 0.4009320490211176  
0.7005284495872356 0.5679802012334594 0.4773832869497551  
0.5906733077039027 0.3107540204834273 0.4909552367301044  
0.6080373924345154 0.3305716581673342 0.5695975625806444  
0.6910564223875816 0.5353889605852199 0.3561266511508434  
0.7121474955227475 0.5605839751587408 0.4316797343072125  
0.7323277250349736 0.5846985264876886 0.5074291599524817  
0.5948606964030767 0.2822748072615729 0.4540245197119773  
0.6115573631663974 0.3005550139276438 0.5326350863079924  
0.6290675945415536 0.3207314897382310 0.6102671757318119  
0.3830034752667885 0.4819031291710839 0.6073052174883157  
0.3557715610927717 0.4409176292205678 0.4737214972286367  
0.4186085135404727 0.6029935103898533 0.4118874042705353  
0.4463795211375387 0.6434243282141756 0.5455266028708784  
0.2539947725657749 0.4219497363380535 0.5761359538116894  
0.3745767113790984 0.7342370384446720 0.4571909420712861  
0.6108374911645535 0.5190668887259871 0.3952395916008293  
0.6464042274273996 0.5608330583078985 0.5267191961628513  
0.5503406162378702 0.3613098714344763 0.4558934630828700

|                    |                    |                    |
|--------------------|--------------------|--------------------|
| 0.5810923570848752 | 0.3957750224106588 | 0.5906042250217959 |
| 0.7432780999861571 | 0.5746233722389806 | 0.4189126627066902 |
| 0.6244273506677587 | 0.2669204114326270 | 0.5383086211338751 |
| 0.3295805126250985 | 0.7199525056357982 | 0.4078207532850424 |
| 0.2165921676401913 | 0.4274539674720766 | 0.5193704156780775 |
| 0.4032415077836705 | 0.6326952432229341 | 0.3556411061610191 |
| 0.3133819081024730 | 0.4010131399928480 | 0.4439077709326298 |
| 0.5479561871257635 | 0.3075106697095057 | 0.4198995360535542 |
| 0.7536601658674227 | 0.5350222257495099 | 0.3643482997739100 |
| 0.6453556959633934 | 0.2509072086082856 | 0.4752623409983961 |
| 0.5966962841924596 | 0.3616106201761816 | 0.6462768642062893 |
| 0.6699698617192565 | 0.2785547587428601 | 0.5869207381343472 |
| 0.7831880146275492 | 0.5682066185846766 | 0.4736787904552842 |
| 0.6918558494360284 | 0.6045968070220172 | 0.5519235231524241 |
| 0.3588284928151107 | 0.4702762602148748 | 0.6670530137762639 |
| 0.2391500517352655 | 0.4583809801392341 | 0.6304813822182429 |
| 0.3538074517536763 | 0.7548053493986140 | 0.5178595461691259 |
| 0.4485293039860160 | 0.6995603478162201 | 0.5792836066652197 |
| 0.6317446258400476 | 0.5298075528258667 | 0.3348495561140464 |

**V\*-Ta DMSC**

1.0000000000000000  
30.0000000000000000 0.0000000000000000 0.0000000000000000  
0.0000000000000000 30.0000000000000000 0.0000000000000000  
0.0000000000000000 0.0000000000000000 30.0000000000000000

Ta V O C H  
1 1 24 36 28

**Direct**

|                    |                    |                    |
|--------------------|--------------------|--------------------|
| 0.4926800149585057 | 0.4919574288110372 | 0.4713846180669312 |
| 0.5069814068021560 | 0.5118974392659563 | 0.5379162424398970 |
| 0.3277334098248465 | 0.4732291862203992 | 0.6762661134663064 |
| 0.2806552807847741 | 0.4023574067569841 | 0.4457108949662003 |
| 0.3773223723374317 | 0.6521620636174160 | 0.3505556623920898 |
| 0.4248800405533619 | 0.7218237231456777 | 0.5813415465371816 |
| 0.2249770633555233 | 0.4096448955363831 | 0.4933971501124758 |
| 0.4781676644747572 | 0.5745658178901757 | 0.5255612065533778 |
| 0.4441521661408417 | 0.4886158188284038 | 0.5585091681570310 |
| 0.3408360174637239 | 0.7094121811922653 | 0.3791370477180889 |
| 0.3752501997393328 | 0.7592829540217785 | 0.5418996573837686 |
| 0.4313374760563779 | 0.4679971351585359 | 0.4871137039826033 |
| 0.4638242867605275 | 0.5510737746985068 | 0.4553526764036859 |
| 0.2584808621037520 | 0.4577685942676654 | 0.6565837115229475 |
| 0.5701182122169296 | 0.5355327834902927 | 0.5179891476170929 |
| 0.5358469375953945 | 0.4492949630126322 | 0.5511869158433753 |
| 0.5197186246980247 | 0.4306945686786861 | 0.4798898916416101 |
| 0.5521420456651788 | 0.5135320785581751 | 0.4481265859683459 |

0.7331689345487419 0.5367732674380631 0.3391034448239894  
0.7238123998728538 0.5999459379500128 0.5487560638174971  
0.7766760216760977 0.5879853965536029 0.4987833438967907  
0.5719265659028016 0.2854129461488101 0.4155118757689960  
0.6233613531677571 0.2469445232518147 0.4515600649936830  
0.6590175816714987 0.2872624289907664 0.6163628670216429  
0.6228590048632523 0.3425767272264518 0.6489498539475184  
0.6621754064204117 0.5252035154805591 0.3232365527627989  
0.3008872616802806 0.4616994328482492 0.6420278636541554  
0.2692427276902339 0.4149075265547917 0.4873899858435025  
0.3705281584929940 0.6767397873872700 0.3876317140149828  
0.4027330654205445 0.7236537314724086 0.5422078893813120  
0.4606023338943276 0.5804673375743734 0.4862804126860598  
0.4182645652485639 0.4724579596960410 0.5276099553743328  
0.3588178496683707 0.4661697005920135 0.5844353377464805  
0.3433682331722411 0.4427705955413454 0.5080589033647323  
0.4159072952588594 0.6296673989316870 0.4367788280828502  
0.4317473382035059 0.6528996590376700 0.5131359647513738  
0.2847639053925913 0.4369718705855919 0.5651318114338183  
0.3871163392292688 0.7013127654141821 0.4644315023345016  
0.3145363026132108 0.4550126800489022 0.5976836929344741  
0.2987073156633536 0.4313392222897521 0.5198944978377412  
0.3908896704196681 0.6694383755840203 0.4291811701281423  
0.4070607181804430 0.6930627592977354 0.5069323654888743  
0.4360919425315742 0.6221502493498543 0.4782097087224243  
0.3726669258738600 0.4595746614714796 0.5403085567979614  
0.5801875866694078 0.5297469921792973 0.4761866769136056  
0.5377710946083958 0.4217229159194130 0.5177062276307528  
0.6252404365588228 0.5416466179735797 0.4609209535457769  
0.5620574213287717 0.3794861329251748 0.5234624557743255  
0.6365629509392956 0.5341141506568525 0.4162458137574690  
0.6566079033048815 0.5582225894143490 0.4913790974381930  
0.5657432050659470 0.3503980546801205 0.4871176675418201  
0.5830051655038737 0.3701125336213985 0.5642037071557127  
0.6804732696969741 0.5434185026377377 0.4006284088505402  
0.7008925930226485 0.5681160829121564 0.4769954081842050  
0.5909060855616380 0.3102549096763721 0.4908806543863785  
0.6081593212323910 0.3300501165582647 0.5694523493153458  
0.6914527222758302 0.5354835620923902 0.3557935428475594  
0.7124716450514845 0.5608243160791743 0.4313170370867398  
0.7325636553347330 0.5848382409956177 0.5072634063746441  
0.5950593676666832 0.2817917696092060 0.4539132572471881  
0.6115928245714238 0.3000205894475653 0.5325690372810178  
0.6291385767937370 0.3204028225579875 0.6102791382806647  
0.3826703434769314 0.4816454221783951 0.6071468298003317  
0.3555523888828936 0.4409270901955857 0.4738155238180543

0.4184479551719356 0.6031779537899341 0.4119480849213718  
 0.4462700561467989 0.6436828621423487 0.5452083232269428  
 0.2534922153026734 0.4217976585199343 0.5760038601990993  
 0.3742729582066456 0.7345443481463449 0.4569066773271286  
 0.6110833910136622 0.5190188992744936 0.3951163709375807  
 0.6464882310557912 0.5609091506631680 0.5262302240449804  
 0.5505614470731225 0.3611258126831309 0.4558420490897402  
 0.5810319147628727 0.3953835488950674 0.5903123461293714  
 0.7436638468438519 0.5746368334903076 0.4185493993195181  
 0.6246675310659014 0.2664874173081089 0.5381247384969481  
 0.3294157366019649 0.7202842217610174 0.4075979272054188  
 0.2162141659324442 0.4272437387821631 0.5193324557000722  
 0.4030008647718931 0.6327845205496547 0.3556388005947790  
 0.3131447240529964 0.4010675440307807 0.4439208525162701  
 0.5482137833289633 0.3073077011277243 0.4198633113352548  
 0.7540112694360119 0.5351525546934546 0.3640390095851035  
 0.6455136291898029 0.2504288356521838 0.4751433857662098  
 0.5967070852987180 0.3617126120785005 0.6457992576672203  
 0.6700780891538295 0.2783501048036608 0.5870707752846653  
 0.7833888263387723 0.5683608464661066 0.4736937214819422  
 0.6916598691373100 0.6042036544343496 0.5516668024391426  
 0.3587007679492131 0.4702940380101145 0.6666244008594002  
 0.2389182213700733 0.4583508106470449 0.6305973158620440  
 0.3536949099123442 0.7550451214773928 0.5179010341201268  
 0.4483631899553881 0.6993954386485344 0.5789180457550931  
 0.6320467875248378 0.5297369671454131 0.3347560259539479

**Nb\*-V**

1.0000000000000000

30.0000000000000000 0.0000000000000000 0.0000000000000000  
 0.0000000000000000 30.0000000000000000 0.0000000000000000  
 0.0000000000000000 0.0000000000000000 30.0000000000000000

Nb V O C H  
 1 1 24 36 28

**Direct**

0.5071583376080313 0.5122014979153408 0.5389478809852261  
 0.4925728850504558 0.4917825726941281 0.4708695348844115  
 0.3277345685762041 0.4731831558651639 0.6762598952923460  
 0.2807450631443127 0.4024338472914846 0.4457259384511673  
 0.3773786663904807 0.6520793286416480 0.3506155128314415  
 0.4248541158308001 0.7218136167599490 0.5813167594577334  
 0.2249553379195172 0.4096191946275234 0.4934202576299131  
 0.4780886273868765 0.5748585475582798 0.5253233572100071  
 0.4437928586411161 0.4884627891027116 0.5584742486595732  
 0.3408320304041511 0.7094454674705913 0.3791276522812115  
 0.3753319151318391 0.7593078445450659 0.5417839019655323

0.4313050784739398 0.4681155566877102 0.4869146931879480  
0.4636784972294318 0.5508981415076418 0.4552696224708695  
0.2585278937367350 0.4576584126345232 0.6565545879333090  
0.5704708265481506 0.5356257954778660 0.5178940301286061  
0.5359321913749009 0.4488855462806723 0.5512834905873634  
0.5197514949585236 0.4307795670158687 0.4798623187579714  
0.5520817130216723 0.5134893098535788 0.4481727624974113  
0.7331348377050155 0.5367834583620942 0.3391203123176725  
0.7239353148410094 0.6000450604511279 0.5486954198114584  
0.7767091410261376 0.5880478217515468 0.4986251144764581  
0.5718694878491030 0.2856005149423326 0.4155546281439200  
0.6233303495510809 0.2469664554878860 0.4515779883651788  
0.6589910807145961 0.2871775383532209 0.6162695831816122  
0.6229110054965284 0.3424698982418538 0.6489671729284785  
0.6620311424077745 0.5251594378102501 0.3233648825994836  
0.3009510314027661 0.4616988706442315 0.6420263888451625  
0.2692614772720056 0.4148948597083092 0.4873661054487907  
0.3705621390176576 0.6767072589355005 0.3876026759995537  
0.4027550178306504 0.7236009303046769 0.5421996736698417  
0.4605879739742367 0.5804133930085035 0.4862238325896078  
0.4182376851336331 0.4724894568933636 0.5275175382786309  
0.3588676583135409 0.4661732235998399 0.5843226451042550  
0.3433811296372257 0.4427449798189238 0.5079555099560451  
0.4159151492942442 0.6296005535286938 0.4366903658587390  
0.4317506442826519 0.6527902707181661 0.5130564275229766  
0.2848636056746637 0.4370315403754600 0.5651074628672145  
0.3871464766185423 0.7012006825645191 0.4644654581721466  
0.3146350279075406 0.4550715910977888 0.5976559804947214  
0.2987634907327612 0.4313491977747037 0.5198728624355731  
0.3909314779770587 0.6693709787412108 0.4291809764282785  
0.4070885787622205 0.6929404101220991 0.5069561594656566  
0.4360482006126732 0.6220977768791895 0.4780968899032487  
0.3726397974563938 0.4595592568059740 0.5401808971495093  
0.5801809689225317 0.5297567870406177 0.4762709822188670  
0.5377524602709985 0.4217473190758531 0.5177736043431572  
0.6252263771646044 0.5416530651333273 0.4609169395033219  
0.5620238453519775 0.3794895535821339 0.5234505392107500  
0.6364752952915068 0.5341394519482372 0.4162748926616132  
0.6565789911582142 0.5581859963549490 0.4913958050525842  
0.5656496732015220 0.3504545356522804 0.4871232417673790  
0.5829907655983644 0.3701589654440594 0.5641731536731068  
0.6803739710451344 0.5433980260553980 0.4006896247025675  
0.7008675708090842 0.5680607418951050 0.4770581000026151  
0.5908379001358844 0.3103517057338671 0.4908992292775277  
0.6081823056763563 0.3301458007339864 0.5694669286143553  
0.6913577445055842 0.5354694246032863 0.3558191682551564

|                    |                    |                    |
|--------------------|--------------------|--------------------|
| 0.7124013855507911 | 0.5607547150472340 | 0.4313831784624965 |
| 0.7326016925138820 | 0.5848493423901766 | 0.5072534326663612 |
| 0.5949929133251753 | 0.2818595531291197 | 0.4539038556698288 |
| 0.6115852780329166 | 0.3001473367272430 | 0.5325666097500525 |
| 0.6291750659781681 | 0.3204044811479838 | 0.6102789010974915 |
| 0.3827751359910301 | 0.4816409361441890 | 0.6069562114787475 |
| 0.3555574613153328 | 0.4408720801084229 | 0.4737270017869992 |
| 0.4184836258667882 | 0.6031554960407715 | 0.4118381267417595 |
| 0.4463066555810704 | 0.6435107770487523 | 0.5450715619789144 |
| 0.2535440214088181 | 0.4219597362128607 | 0.5760719556237810 |
| 0.3742200614888833 | 0.7344623828327423 | 0.4570520674777553 |
| 0.6109656317436845 | 0.5191124284071391 | 0.3951508182360200 |
| 0.6464566191798672 | 0.5608451552815290 | 0.5262329321064682 |
| 0.5504031709861241 | 0.3611479479690019 | 0.4558817422996828 |
| 0.5810064727270153 | 0.3954484257157537 | 0.5902483958956830 |
| 0.7436524708021380 | 0.5745172455859108 | 0.4186610816459096 |
| 0.6247389368552034 | 0.2666239917566090 | 0.5381502229639304 |
| 0.3294222902764396 | 0.7201788823256711 | 0.4076499642850373 |
| 0.2162818458651939 | 0.4273193409916933 | 0.5193241955196464 |
| 0.4030142881839117 | 0.6327019801269483 | 0.3557945461842189 |
| 0.3132233693905854 | 0.4012478819275682 | 0.4439780805933097 |
| 0.5482524532301147 | 0.3075655081840272 | 0.4199369507882524 |
| 0.7538967404308734 | 0.5350784893789212 | 0.3641156077551973 |
| 0.6454645647111150 | 0.2505937111250172 | 0.4751588084750072 |
| 0.5968228192342001 | 0.3616428496970250 | 0.6459253767254231 |
| 0.6701279141265024 | 0.2783304766554479 | 0.5869957818796480 |
| 0.7834574313129882 | 0.5682788320255404 | 0.4736527829930999 |
| 0.6918382171935187 | 0.6043137159735723 | 0.5517117875420655 |
| 0.3586985872865209 | 0.4703794476890867 | 0.6666848998379695 |
| 0.2389119250478750 | 0.4583026113046866 | 0.6306100421841835 |
| 0.3536966580039632 | 0.7550687723099270 | 0.5178535149480828 |
| 0.4482797446666734 | 0.6993681693169531 | 0.5790310454751075 |
| 0.6319489820753511 | 0.5296301947181551 | 0.3349654698559555 |

**Co\*-Au**

1.0000000000000000  
 30.0000000000000000 0.0000000000000000 0.0000000000000000  
 0.0000000000000000 30.0000000000000000 0.0000000000000000  
 0.0000000000000000 0.0000000000000000 30.0000000000000000  
 Au Co O C Li H  
 1 1 26 36 1 28

**Direct**

|                    |                    |                    |
|--------------------|--------------------|--------------------|
| 0.4860511066122951 | 0.4965902476364287 | 0.4924542357622563 |
| 0.5141072995066788 | 0.5154360452903287 | 0.5716144032113518 |
| 0.2997579669378932 | 0.4599142565955872 | 0.6652829240055458 |

0.3024734185150759 0.4010828904002381 0.4272122203910063  
0.3933879276047595 0.6390364553924199 0.3660188550842968  
0.4215376495121445 0.7350877123849351 0.5900645226624055  
0.2388402975012720 0.3987514550687056 0.4641464943391004  
0.4859380001507067 0.5819705287624991 0.5517670568268880  
0.4283607739504778 0.5019477018655505 0.5721607315322628  
0.3539658900620437 0.6982818634768937 0.3848060705170575  
0.3738706908558731 0.7654949650733002 0.5430450939594904  
0.4386133339802574 0.4719375107950222 0.5030694580781705  
0.4693634788641533 0.5526409543345304 0.4834825597831589  
0.2376273748560934 0.4367380527262298 0.6338738184133141  
0.5756056485769431 0.5724275650602483 0.5114343704790063  
0.5451604597685265 0.4519327145612059 0.5714324198198173  
0.5217079758912700 0.4391438844408505 0.4999017552186629  
0.5518942894955301 0.5151618057384328 0.4673864448907998  
0.7127692823589582 0.5141359474054401 0.3222577656520523  
0.7402357143132499 0.5960268912347766 0.5237424215443803  
0.7838616875273625 0.5765107454201187 0.4680910789861271  
0.5630231497136908 0.2995483334517016 0.4193351151764725  
0.6137324178365376 0.2550874971153398 0.4487898420434507  
0.6610065159910715 0.2778362033013940 0.6135845105914202  
0.6310889679578382 0.3324184165193240 0.6528154828818411  
0.6393963264723553 0.5097183326540136 0.3174945223798432  
0.5607725360417817 0.6019335947797556 0.6229671677979819  
0.5495282348603022 0.5602451208178123 0.6322290977886795  
0.2806729003330173 0.4475270735684523 0.6266685009779008  
0.2825323685532040 0.4093611566695156 0.4665948369795098  
0.3831603076678022 0.6673062328162976 0.3994324031647180  
0.4023086685149359 0.7312463824404671 0.5496864276478696  
0.4675833912837699 0.5833098559408856 0.5127522738899877  
0.4156206922489114 0.4802228270957925 0.5388297732126317  
0.3464180582974040 0.4632568862030140 0.5805902275447069  
0.3485366867720794 0.4432306452761379 0.5022521122911486  
0.4251655746246138 0.6269604383581250 0.4568409983347081  
0.4351999950528112 0.6583145138917632 0.5310997526688875  
0.2814337285326660 0.4273510170134106 0.5466729873767068  
0.3934162180720000 0.7002400079656516 0.4742156957025677  
0.3023133080160119 0.4460968880186277 0.5849725793300227  
0.3038678119568485 0.4265214886135629 0.5047831943839629  
0.4002821239226118 0.6650058423244199 0.4430370160015739  
0.4102039266502465 0.6969797485082164 0.5186587541698606  
0.4424619505868786 0.6242307348499577 0.5001049379250597  
0.3690966098689814 0.4610851217963631 0.5399757971041559  
0.5802598776076395 0.5447741828185082 0.4800986546574152  
0.5421353519165916 0.4283892748916623 0.5356029153684305  
0.6239975780584610 0.5456312814038290 0.4555265980259092



0.5650097274665407 0.3841311300186206 0.5357658729206481  
0.6282845338388473 0.5293913402969668 0.4120949901627625  
0.6608593109790445 0.5624781870671186 0.4784340274605678  
0.5649889567227714 0.3585030964723317 0.4967721649904828  
0.5875883097113238 0.3696720350333110 0.5738501763335336  
0.6702639595125097 0.5323101625647280 0.3894908340854851  
0.7039397511302715 0.5635008891577002 0.4582092795663895  
0.5875576788249249 0.3166158203452865 0.4953222428687223  
0.6105431273480370 0.3279106924051061 0.5739126217135113  
0.6739951450311209 0.5190492779915489 0.3446132117415133  
0.7077847883353238 0.5496178284799494 0.4129231851686858  
0.7412679014077865 0.5782703326701816 0.4825334630404909  
0.5878901546457570 0.2912654405435822 0.4558339305847465  
0.6096877142934801 0.3012287392773631 0.5345158859358354  
0.6333127897777866 0.3133109787954431 0.6122707915260527  
0.5489877856615173 0.5943356272927526 0.5611708825118916  
0.3638308500579064 0.4800248591383927 0.6078350268893496  
0.3670364867298628 0.4442257472736117 0.4709207839464337  
0.4298571289443173 0.5981014586948987 0.4352089044448829  
0.4470011242477080 0.6530897339522066 0.5651259641886884  
0.2501412061573215 0.4090020937150542 0.5504203713332159  
0.3802907407786238 0.7321034575435129 0.4623910363467592  
0.5993496441016990 0.5132933660704385 0.3970025146583857  
0.6551314249228631 0.5734527648580294 0.5126640568999214  
0.5488301523610656 0.3727666032131355 0.4674990694011774  
0.5884118033384746 0.3923052807472873 0.6023269691385519  
0.7383243622911727 0.5571527522123915 0.3944868403376514  
0.6210736992713297 0.2666355310439155 0.5361287534460341  
0.3398142857033258 0.7120542239535897 0.4106778318236468  
0.2232839376157374 0.4135410294258190 0.4886081620070878  
0.4187432098495169 0.6208715939577547 0.3752977896487693  
0.3346936126913644 0.4033946555035216 0.4312668632801869  
0.5405745890898858 0.3218437961361728 0.4269742057903602  
0.7369925891318018 0.5122824373741468 0.3439107228812452  
0.6378211429483789 0.2553160540442042 0.4706934934223004  
0.6069542167092553 0.3542760069077069 0.6528924611297336  
0.6691722017543352 0.2701491323281807 0.5830381048532614  
0.7852583493770364 0.5566378166885426 0.4423798158178401  
0.7092925212919976 0.6003289944182464 0.5327363964690234  
0.3317435682264178 0.4635487692103600 0.6603674802268739  
0.2223868810806719 0.4353686654286776 0.6051894344794242  
0.3536657297320331 0.7574490693631167 0.5188134231494351  
0.4461481084811794 0.7138867299650939 0.5921423975517941  
0.6120588975750192 0.5198285139855775 0.3319884680520949

Ni\*-Cu

1.0000000000000000  
30.0000000000000000 0.0000000000000000 0.0000000000000000  
0.0000000000000000 30.0000000000000000 0.0000000000000000  
0.0000000000000000 0.0000000000000000 30.0000000000000000

Cu Ni O C Li H  
1 1 26 36 1 28

Direct

0.4797229019035769 0.4746269484763675 0.3925721881643791  
0.5008914614352632 0.5164393860656901 0.5676989646957491  
0.3290194675246702 0.4736859884202190 0.6774067316640628  
0.2815482786542719 0.4030860302773366 0.4446530735859911  
0.3779990884174751 0.6507046193407932 0.3506079125151434  
0.4256827027263219 0.7210044236341966 0.5825253690695138  
0.2233894998613914 0.4096714032232282 0.4949491014747693  
0.4780335733808964 0.5743621910918115 0.5255937492803864  
0.4431729505389663 0.4893179125267303 0.5583870494195843  
0.3402971096696796 0.7110799705726151 0.3806174994411267  
0.3742233794705480 0.7605443048430169 0.5408303474081688  
0.4246829979534545 0.4642074013675840 0.4880650138387491  
0.4589349860078193 0.5571760551037940 0.4533989437335242  
0.2566478585634876 0.4569098623651294 0.6571938478212138  
0.5700357494892198 0.5373369411047546 0.5188869520760040  
0.5341475471128563 0.4476353357361202 0.5516179462391363  
0.5250149385370533 0.4244400700054060 0.4804856860498048  
0.5583541722109349 0.5166216669736124 0.4458739230884598  
0.7339503219348839 0.5371237397144482 0.3397962417090027  
0.7254036727633979 0.5996030279860110 0.5496345138636479  
0.7783912620114326 0.5879971797206190 0.4973611396890733  
0.5712630519300297 0.2876849345648933 0.4149888268766364  
0.6239996458924124 0.2466330272355225 0.4526277013929593  
0.6600605385474210 0.2854004666557418 0.6161715214234185  
0.6231884188251404 0.3431332053553158 0.6499931093449333  
0.6602548984025254 0.5241656464869490 0.3240356845207102  
0.5671928540250966 0.5173409440817541 0.6192259828302047  
0.5246435535923790 0.5299505608703101 0.6055160118486976  
0.3026367582229377 0.4607727869515369 0.6370414871130871  
0.2731949968612030 0.4174531095619174 0.4921575803813156  
0.3730587958521179 0.6759382420167053 0.3931343476322481  
0.4031242540241792 0.7203289131978765 0.5383141683353883  
0.4600760104814904 0.5799443065019434 0.4857244006615329  
0.4173500217040830 0.4725737902219483 0.5278108689468595  
0.3592998232252191 0.4656965253214700 0.5842311649483546  
0.3442274984454126 0.4426220870464563 0.5096216898193009  
0.4164707258287378 0.6303836416004373 0.4375380728797780  
0.4320070608395226 0.6533676047601567 0.5132047874229545  
0.2835376852137009 0.4369192439454222 0.5658692163875080

0.3864938437716251 0.7020822639248695 0.4647333475018929  
0.3137015896144607 0.4553319497797045 0.6018175779282374  
0.2966604565833272 0.4300443517728303 0.5180611142494459  
0.3896937293244607 0.6699980248093230 0.4262873938666180  
0.4070397887835098 0.6957512783372646 0.5103762064307293  
0.4353017764017553 0.6242083868197430 0.4789737383169080  
0.3719225358029229 0.4596167758241173 0.5417402558657425  
0.5836099885508439 0.5314269010924234 0.4743375422171591  
0.5382555144292656 0.4201427500693296 0.5197705164906010  
0.6234655201769170 0.5427005813578478 0.4634050162336327  
0.5613317521731311 0.3804633283677712 0.5255163719527061  
0.6378283840052343 0.5351056535330613 0.4163024758240818  
0.6600320892998145 0.5565753002928643 0.4920638275827799  
0.5662025306167460 0.3492854535348647 0.4883496706586115  
0.5839933720865311 0.3689612216484618 0.5657341851718726  
0.6792376099467383 0.5426168216327959 0.3980371210619367  
0.7022099541826501 0.5695225154901306 0.4808481443054753  
0.5900806707175997 0.3100124128137196 0.4887335052783329  
0.6091641194866229 0.3307383310503422 0.5734282110160080  
0.6903338339188828 0.5362709134618104 0.3616069792025710  
0.7136346057663138 0.5613606716513789 0.4316197893076975  
0.7305057570386601 0.5831621775005825 0.5046827608863262  
0.5948055721313781 0.2857732872072702 0.4591758542701520  
0.6118555899888541 0.2999878457656919 0.5328627185256326  
0.6273628640731150 0.3213259836823201 0.6058574009115728  
0.5763955897079198 0.5555138837037885 0.5818531564661144  
0.3814534107934461 0.4813131332947574 0.6065829968679974  
0.3553219485925326 0.4412083487185915 0.4763502000701081  
0.4186973804858953 0.6045932939907569 0.4138706279509068  
0.4453504096988165 0.6443623309928548 0.5442026847206929  
0.2557066374428896 0.4221149119290417 0.5760375735291055  
0.3753453972978417 0.7332553184851950 0.4575183127172528  
0.6126998152050179 0.5209374946896178 0.3981477629844393  
0.6498749269168156 0.5603318768611757 0.5252953268302730  
0.5512535780181048 0.3608786374077385 0.4597419880107093  
0.5835005317036731 0.3936559541457856 0.5890978897448489  
0.7429707128012231 0.5747331508666327 0.4189869976290621  
0.6240232212066376 0.2672571034799172 0.5384461894545064  
0.3292241450224782 0.7194975910478019 0.4071785363314582  
0.2162623159519163 0.4278516431978517 0.5191433012818808  
0.4023543933825062 0.6339193528797197 0.3556779698326196  
0.3124079632626171 0.4010953161637603 0.4443395985227592  
0.5485728257667640 0.3071950881182450 0.4200036696700842  
0.7552662151535623 0.5344261283293599 0.3650718372358794  
0.6470581578034901 0.2508060354406109 0.4758573703613836  
0.5976616249064697 0.3599186342937134 0.6473395915308615

0.6714406578453070 0.2775929307511258 0.5870230569545617  
0.7852738062191431 0.5678017831054525 0.4734037837669893  
0.6919397837292325 0.6070503820316876 0.5521995552463016  
0.3579014454242687 0.4706974076985062 0.6674180076478169  
0.2389670158467453 0.4586872770114070 0.6316630947891309  
0.3539656868340968 0.7554013960329033 0.5191279463346479  
0.4469186298160897 0.7003830343758902 0.5795844513233983  
0.6325274556119057 0.5297738929430762 0.3347097583441330

**Mn\*-Re**

1.0000000000000000

30.0000000000000000 0.0000000000000000 0.0000000000000000  
0.0000000000000000 30.0000000000000000 0.0000000000000000  
0.0000000000000000 0.0000000000000000 30.0000000000000000

Re Mn O C Li H  
1 1 26 36 1 28

**Direct**

0.4926542187788996 0.4914034952373622 0.4704619428200162  
0.5108148470377027 0.5124608079466085 0.5446236423262691  
0.3298352731533271 0.4736140436503652 0.6815245321772695  
0.2845618446532364 0.4051263530270525 0.4499403477473099  
0.3792639924909097 0.6510799845863090 0.3553993508356939  
0.4260791901329081 0.7240770550313907 0.5853487321311565  
0.2285340716631094 0.4119426544397601 0.4972762645890098  
0.4793538089437867 0.5724250485634338 0.5302297264891881  
0.4486891582239264 0.4907451271993083 0.5614263973915892  
0.3427368960858812 0.7085953739216598 0.3831963627980659  
0.3757016443803604 0.7600261409539301 0.5452623478090581  
0.4325282966525820 0.4688760495064719 0.4908110852752275  
0.4647129643379174 0.5521847602939851 0.4592242759138616  
0.2607582363047818 0.4590160332977964 0.6605673485225727  
0.5688775752833226 0.5340365360214282 0.5206068155701966  
0.5373190121857095 0.4523529852196999 0.5527094052726589  
0.5205196562162434 0.4311767463684812 0.4819822951884615  
0.5526959708412427 0.5135358435099044 0.4496047892172284  
0.7338606643924913 0.5382078335231804 0.3432554047147767  
0.7227004402996959 0.6002839944051206 0.5531293262736554  
0.7756442977256449 0.5892292538326604 0.5032430650201061  
0.5728862336512708 0.2874324670258183 0.4190270647335080  
0.6236391589084042 0.2483841372045133 0.4554583771145223  
0.6590749061745623 0.2891135343492234 0.6200719206047629  
0.6231831435756402 0.3445966238292872 0.6525442365564138  
0.6631539514791954 0.5255356096775875 0.3270445504257242  
0.5195286370138199 0.5315065721592788 0.6033643929663510  
0.5364355112014689 0.5743781817504773 0.6131506464254000  
0.3034753974869585 0.4627897011414272 0.6466991035618077  
0.2729102956698218 0.4174381617265317 0.4916122785633492

0.3722158220239780 0.6758058166085076 0.3922622219319311  
0.4038787152487916 0.7248764441718712 0.5460981481936240  
0.4620107838184996 0.5798319305934256 0.4913861072796149  
0.4222302818089324 0.4745454254535809 0.5320068221063832  
0.3622897223905498 0.4677220580518940 0.5896146804396281  
0.3469763930883998 0.4452331082458736 0.5131029922292589  
0.4172146448778237 0.6292335056427842 0.4423683406225649  
0.4333475271683183 0.6536781130958051 0.5180389056183239  
0.2880165049964048 0.4391422406928636 0.5695800999971582  
0.3885371418485276 0.7013773972859870 0.4687981257281150  
0.3177232854382543 0.4566396428088529 0.6024859421933859  
0.3021791113277955 0.4337519437105704 0.5244031640520479  
0.3923861599640093 0.6689666822483041 0.4340440724726009  
0.4085236821394786 0.6937624243503226 0.5114019111894397  
0.4375198021987933 0.6221730253582215 0.4838363118537363  
0.3762266528792192 0.4616746783712334 0.5455209356287224  
0.5791969008773304 0.5292099233308366 0.4794800753754810  
0.5384639735078181 0.4244805781522348 0.5203232742060813  
0.6248259449486283 0.5417357874061471 0.4645891378374090  
0.5626971066652903 0.3817174643046615 0.5269035929649737  
0.6366459342427956 0.5340379795819825 0.4201458032965263  
0.6556466150116326 0.5587195492232140 0.4951765858779638  
0.5666661554737897 0.3526755645025330 0.4906807331117765  
0.5831178869940424 0.3722254811576167 0.5677544736230229  
0.6805524775350211 0.5438167864350989 0.4046715453572693  
0.7000381112136503 0.5689408245105079 0.4810972012876579  
0.5916230954738665 0.3123646642370971 0.4944616062185878  
0.6082316321445200 0.3320219934010342 0.5731754263961951  
0.6920477732902293 0.5361181494664593 0.3598823115373017  
0.7120560932908937 0.5617147287466755 0.4355652854442094  
0.7315166569706301 0.5856131870301807 0.5116289263927325  
0.5957620259168429 0.2837100611872375 0.4575941352208357  
0.6119088484095614 0.3020487014492865 0.5362990439094931  
0.6293074842651093 0.3223910978829161 0.6139557715060300  
0.4814852109415734 0.5824455491294259 0.5916349459641662  
0.3860374319154309 0.4823525335492566 0.6129481088229566  
0.3593153026133827 0.4434901363167004 0.4789464947541481  
0.4195834245105444 0.6025224707023968 0.4178549011510025  
0.4483464138104795 0.6466168839200449 0.5503730981963297  
0.2564200289911983 0.4243262780783039 0.5801159875548234  
0.3757953087766162 0.7345883434410756 0.4609008725289055  
0.6116807688220881 0.5184597725760980 0.3987776843385055  
0.6451419037344669 0.5617271411105955 0.5298858547231978  
0.5519245949880538 0.3633739373942361 0.4592328414419449  
0.5809141171580154 0.3972608257389831 0.5940654863901911  
0.7433600810927807 0.5755660499423801 0.4230204746159758

|                    |                    |                    |
|--------------------|--------------------|--------------------|
| 0.6253282751870876 | 0.2685997665307212 | 0.5417688319091956 |
| 0.3310491683644456 | 0.7198526614709365 | 0.4114291340284250 |
| 0.2194361867804654 | 0.4294576880700368 | 0.5231517161569997 |
| 0.4051919040781284 | 0.6320238779347445 | 0.3604534678239747 |
| 0.3170151777158854 | 0.4034019623717154 | 0.4483521238917598 |
| 0.5491061674586183 | 0.3092437199681978 | 0.4232660137984022 |
| 0.7548437157434216 | 0.5361928131870457 | 0.3680386771722750 |
| 0.6462089008748405 | 0.2516638914626786 | 0.4786613590063167 |
| 0.5976268821557424 | 0.3644724504422880 | 0.6493415107616781 |
| 0.6700600917024446 | 0.2799075423305297 | 0.5908345410492861 |
| 0.7825867685867044 | 0.5702796084854463 | 0.4776973597274936 |
| 0.6904880018208679 | 0.6028803344280024 | 0.5568758622252177 |
| 0.3608706593501801 | 0.4695171127938447 | 0.6727441972917225 |
| 0.2415053959484670 | 0.4605274771355992 | 0.6343516298863556 |
| 0.3535807321217715 | 0.7546935517024813 | 0.5219743580186124 |
| 0.4531056694086040 | 0.7063789628954031 | 0.5818609281877879 |
| 0.6328993379534716 | 0.5299757440615898 | 0.3381551008804416 |

### Ni\*-Pt

1.0000000000000000

30.0000000000000000 0.0000000000000000 0.0000000000000000

0.0000000000000000 30.0000000000000000 0.0000000000000000

0.0000000000000000 0.0000000000000000 30.0000000000000000

Pt Ni O C H

1 1 24 36 28

Direct

|                    |                    |                    |
|--------------------|--------------------|--------------------|
| 0.4909692136693797 | 0.4919960960691909 | 0.4683656352276340 |
| 0.5078192876034988 | 0.5145333517190082 | 0.5447111288763596 |
| 0.3209371120986678 | 0.4703224684136077 | 0.6754911752199083 |
| 0.2885861513284921 | 0.3991122890189190 | 0.4426066311959823 |
| 0.3850828582431219 | 0.6499427992819262 | 0.3514648577542798 |
| 0.4252728802536893 | 0.7278113080243653 | 0.5808511575907357 |
| 0.2304254883153994 | 0.4041584443823371 | 0.4875900855240767 |
| 0.4785642659811539 | 0.5739971351651048 | 0.5300817443564348 |
| 0.4451961204107560 | 0.4900815373941035 | 0.5607645606736493 |
| 0.3489909425590964 | 0.7092322085880070 | 0.3762428832410682 |
| 0.3775454923835190 | 0.7637524538986264 | 0.5378197911779784 |
| 0.4311393048576346 | 0.4690627420329975 | 0.4887374332888166 |
| 0.4630056768564016 | 0.5524445600040142 | 0.4584542707718927 |
| 0.2533670130889790 | 0.4543601387701359 | 0.6509660805708682 |
| 0.5688278727266679 | 0.5364029311628318 | 0.5207207693661783 |
| 0.5359073489924995 | 0.4531156610037462 | 0.5527120865107619 |
| 0.5199240768135275 | 0.4324884810000434 | 0.4809352728356594 |
| 0.5510761297856289 | 0.5152934160462892 | 0.4495504289337235 |
| 0.7258234123866958 | 0.5357656741187313 | 0.3357389296327898 |
| 0.7256207115706077 | 0.6051259339717604 | 0.5437218570887793 |

0.7755374443611615 0.5930380409397634 0.4909048986271489  
0.5654366565824984 0.2870275017663953 0.4184909756575080  
0.6158821308883522 0.2466515537916766 0.4539227408728119  
0.6579448193701990 0.2881716058095986 0.6166286453870727  
0.6259578176045785 0.3459954102299240 0.6490681237327335  
0.6544434149754892 0.5218371512606056 0.3240830866385115  
0.2966713265874211 0.4589885411094756 0.6393694085973796  
0.2747602999283696 0.4112610881634904 0.4836488172795293  
0.3773057990191592 0.6759798416157514 0.3872914882306990  
0.4044505610604198 0.7277189410501862 0.5409766285687759  
0.4618844192124769 0.5803037943218734 0.4918332339592104  
0.4204372098050337 0.4741201008553306 0.5305716300515207  
0.3580453191899097 0.4651715088833746 0.5849634658007145  
0.3468409682991071 0.4418968407014544 0.5079833722868503  
0.4194584097262939 0.6296303687251713 0.4399243987863413  
0.4332968689866153 0.6548580671308545 0.5158308989488479  
0.2857322083745201 0.4341477372265710 0.5618909624785945  
0.3913519466739457 0.7026143268012226 0.4639467518723187  
0.3132954998544928 0.4528842274232560 0.5959269174670564  
0.3020322350643062 0.4288863657227073 0.5174974512440528  
0.3956965577923051 0.6696193036362953 0.4299506332547173  
0.4095835679047444 0.6953760385121018 0.5073739270375021  
0.4381167576334531 0.6229438067428658 0.4821374595102380  
0.3741230074033812 0.4593927219410791 0.5415883912907392  
0.5779614605399818 0.5310152670326521 0.4799382790978997  
0.5376432493143478 0.4263195950233901 0.5201712815812577  
0.6231599848090625 0.5426156252813421 0.4624793209508316  
0.5620461262961848 0.3832320130630826 0.5250787923771665  
0.6329987785986417 0.5333037885020189 0.4178470964824606  
0.6554207252402660 0.5607919523211267 0.4908885848664539  
0.5643270708712258 0.3538800428387479 0.4888990222322968  
0.5836232270428646 0.3735668514980255 0.5652883683725686  
0.6759590047685458 0.5428812386601678 0.3998679143290321  
0.6990448981627140 0.5708206848814431 0.4742792445883232  
0.5879478639830530 0.3127292032486638 0.4925968339205856  
0.6079161607099132 0.3328454783905889 0.5703942956936219  
0.6850468971252859 0.5337467075560026 0.3547938065365756  
0.7087186816660624 0.5621472817398770 0.4284336126539658  
0.7320517649608310 0.5890324321573276 0.5021962795881737  
0.5896415791535679 0.2832183733123080 0.4562079514610942  
0.6092584489049818 0.3023191090314982 0.5338501390406371  
0.6297664368003810 0.3228538630626321 0.6106868427419946  
0.3802480325185628 0.4810853410604753 0.6089875591526958  
0.3604003475564427 0.4405249113202568 0.4742922912599463  
0.4221228662995497 0.6024533789758746 0.4159436203268839  
0.4465459747467647 0.6466851667206588 0.5487125895500310

|                    |                    |                    |
|--------------------|--------------------|--------------------|
| 0.2542395128332613 | 0.4182953208498040 | 0.5712001868244874 |
| 0.3793836574281579 | 0.7358629359992158 | 0.4549611834060616 |
| 0.6072445296565070 | 0.5169331721653740 | 0.3981010324267860 |
| 0.6466792010985329 | 0.5650414377543849 | 0.5259512998283827 |
| 0.5489796407448105 | 0.3644369989112397 | 0.4576761994292463 |
| 0.5824419060565658 | 0.3988670928268718 | 0.5914044299773447 |
| 0.7392403042665336 | 0.5757327781820762 | 0.4138490062295167 |
| 0.6217687231467013 | 0.2685150977050639 | 0.5393364218799330 |
| 0.3368105491121409 | 0.7216228352313377 | 0.4037719725242601 |
| 0.2197051400491967 | 0.4214683796804046 | 0.5129942032931868 |
| 0.4097764280853290 | 0.6298955778782092 | 0.3584388949899974 |
| 0.3211396576102975 | 0.3986468129966533 | 0.4423688686301046 |
| 0.5425315032698744 | 0.3096853056108710 | 0.4232317146047209 |
| 0.7481504600825089 | 0.5355454628681247 | 0.3594093855013253 |
| 0.6392845484953030 | 0.2495159431536768 | 0.4763489736484456 |
| 0.6013033212245841 | 0.3670219311213692 | 0.6461223295847361 |
| 0.6673343394034605 | 0.2775366024600289 | 0.5873349008949540 |
| 0.7813955462855917 | 0.5730055760637106 | 0.4659207030544560 |
| 0.6936624795823257 | 0.6086094737872011 | 0.5486916659428279 |
| 0.3525115203151382 | 0.4675883306854541 | 0.6681206992916829 |
| 0.2354483402466943 | 0.4554841142429071 | 0.6238054894075040 |
| 0.3561296390737326 | 0.7584015937344138 | 0.5139003173229980 |
| 0.4491731737593801 | 0.7057503025123437 | 0.5801839367894056 |
| 0.6248115538138156 | 0.5262560086742949 | 0.3368531554947069 |

**Au\*-Co**

1.0000000000000000

|                     |                     |                     |
|---------------------|---------------------|---------------------|
| 30.0000000000000000 | 0.0000000000000000  | 0.0000000000000000  |
| 0.0000000000000000  | 30.0000000000000000 | 0.0000000000000000  |
| 0.0000000000000000  | 0.0000000000000000  | 30.0000000000000000 |

|    |    |    |    |    |    |
|----|----|----|----|----|----|
| Au | Co | O  | C  | Li | H  |
| 1  | 1  | 26 | 36 | 1  | 28 |

Direct

|                    |                    |                    |
|--------------------|--------------------|--------------------|
| 0.5141072995066788 | 0.5154360452903287 | 0.5716144032113518 |
| 0.4960511066122951 | 0.4965902476364287 | 0.4924542357622563 |
| 0.2997579669378932 | 0.4599142565955872 | 0.6652829240055458 |
| 0.3024734185150759 | 0.4010828904002381 | 0.4272122203910063 |
| 0.3933879276047595 | 0.6390364553924199 | 0.3660188550842968 |
| 0.4215376495121445 | 0.7350877123849351 | 0.5900645226624055 |
| 0.2388402975012720 | 0.3987514550687056 | 0.4641464943391004 |
| 0.4859380001507067 | 0.5819705287624991 | 0.5517670568268880 |
| 0.4283607739504778 | 0.5019477018655505 | 0.5721607315322628 |
| 0.3539658900620437 | 0.6982818634768937 | 0.3848060705170575 |
| 0.3738706908558731 | 0.7654949650733002 | 0.5430450939594904 |
| 0.4386133339802574 | 0.4719375107950222 | 0.5030694580781705 |



0.4693634788641533 0.5526409543345304 0.4834825597831589  
0.2376273748560934 0.4367380527262298 0.6338738184133141  
0.5756056485769431 0.5724275650602483 0.5114343704790063  
0.5451604597685265 0.4519327145612059 0.5714324198198173  
0.5217079758912700 0.4391438844408505 0.4999017552186629  
0.5518942894955301 0.5151618057384328 0.4673864448907998  
0.7127692823589582 0.5141359474054401 0.3222577656520523  
0.7402357143132499 0.5960268912347766 0.5237424215443803  
0.7838616875273625 0.5765107454201187 0.4680910789861271  
0.5630231497136908 0.2995483334517016 0.4193351151764725  
0.6137324178365376 0.2550874971153398 0.4487898420434507  
0.6610065159910715 0.2778362033013940 0.6135845105914202  
0.6310889679578382 0.3324184165193240 0.6528154828818411  
0.6393963264723553 0.5097183326540136 0.3174945223798432  
0.5607725360417817 0.6019335947797556 0.6229671677979819  
0.5495282348603022 0.5602451208178123 0.6322290977886795  
0.2806729003330173 0.4475270735684523 0.6266685009779008  
0.2825323685532040 0.4093611566695156 0.4665948369795098  
0.3831603076678022 0.6673062328162976 0.3994324031647180  
0.4023086685149359 0.7312463824404671 0.5496864276478696  
0.4675833912837699 0.5833098559408856 0.5127522738899877  
0.4156206922489114 0.4802228270957925 0.5388297732126317  
0.3464180582974040 0.4632568862030140 0.5805902275447069  
0.3485366867720794 0.4432306452761379 0.5022521122911486  
0.4251655746246138 0.6269604383581250 0.4568409983347081  
0.4351999950528112 0.6583145138917632 0.5310997526688875  
0.2814337285326660 0.4273510170134106 0.5466729873767068  
0.3934162180720000 0.7002400079656516 0.4742156957025677  
0.3023133080160119 0.4460968880186277 0.5849725793300227  
0.3038678119568485 0.4265214886135629 0.5047831943839629  
0.4002821239226118 0.6650058423244199 0.4430370160015739  
0.4102039266502465 0.6969797485082164 0.5186587541698606  
0.4424619505868786 0.6242307348499577 0.5001049379250597  
0.3690966098689814 0.4610851217963631 0.5399757971041559  
0.5802598776076395 0.5447741828185082 0.4800986546574152  
0.5421353519165916 0.4283892748916623 0.5356029153684305  
0.6239975780584610 0.5456312814038290 0.4555265980259092  
0.5650097274665407 0.3841311300186206 0.5357658729206481  
0.6282845338388473 0.5293913402969668 0.4120949901627625  
0.6608593109790445 0.5624781870671186 0.4784340274605678  
0.5649889567227714 0.3585030964723317 0.4967721649904828  
0.5875883097113238 0.3696720350333110 0.5738501763335336  
0.6702639595125097 0.5323101625647280 0.3894908340854851  
0.7039397511302715 0.5635008891577002 0.4582092795663895  
0.5875576788249249 0.3166158203452865 0.4953222428687223  
0.6105431273480370 0.3279106924051061 0.5739126217135113

0.6739951450311209 0.5190492779915489 0.3446132117415133  
0.7077847883353238 0.5496178284799494 0.4129231851686858  
0.7412679014077865 0.5782703326701816 0.4825334630404909  
0.5878901546457570 0.2912654405435822 0.4558339305847465  
0.6096877142934801 0.3012287392773631 0.5345158859358354  
0.6333127897777866 0.3133109787954431 0.6122707915260527  
0.5489877856615173 0.5943356272927526 0.5611708825118916  
0.3638308500579064 0.4800248591383927 0.6078350268893496  
0.3670364867298628 0.4442257472736117 0.4709207839464337  
0.4298571289443173 0.5981014586948987 0.4352089044448829  
0.4470011242477080 0.6530897339522066 0.5651259641886884  
0.2501412061573215 0.4090020937150542 0.5504203713332159  
0.3802907407786238 0.7321034575435129 0.4623910363467592  
0.5993496441016990 0.5132933660704385 0.3970025146583857  
0.6551314249228631 0.5734527648580294 0.5126640568999214  
0.5488301523610656 0.3727666032131355 0.4674990694011774  
0.5884118033384746 0.3923052807472873 0.6023269691385519  
0.7383243622911727 0.5571527522123915 0.3944868403376514  
0.6210736992713297 0.2666355310439155 0.5361287534460341  
0.3398142857033258 0.7120542239535897 0.4106778318236468  
0.2232839376157374 0.4135410294258190 0.4886081620070878  
0.4187432098495169 0.6208715939577547 0.3752977896487693  
0.3346936126913644 0.4033946555035216 0.4312668632801869  
0.5405745890898858 0.3218437961361728 0.4269742057903602  
0.7369925891318018 0.5122824373741468 0.3439107228812452  
0.6378211429483789 0.2553160540442042 0.4706934934223004  
0.6069542167092553 0.3542760069077069 0.6528924611297336  
0.6691722017543352 0.2701491323281807 0.5830381048532614  
0.7852583493770364 0.5566378166885426 0.4423798158178401  
0.7092925212919976 0.6003289944182464 0.5327363964690234  
0.3317435682264178 0.4635487692103600 0.6603674802268739  
0.2223868810806719 0.4353686654286776 0.6051894344794242  
0.3536657297320331 0.7574490693631167 0.5188134231494351  
0.4461481084811794 0.7138867299650939 0.5921423975517941  
0.6120588975750192 0.5198285139855775 0.3319884680520949

**Cu\*-Ni**

1.0000000000000000  
30.0000000000000000 0.0000000000000000 0.0000000000000000  
0.0000000000000000 30.0000000000000000 0.0000000000000000  
0.0000000000000000 0.0000000000000000 30.0000000000000000

Cu Ni O C Li H  
1 1 26 36 1 28

**Direct**

0.5008914614352632 0.5164393860656901 0.5676989646957491  
0.4797229019035769 0.4746269484763675 0.3925721881643791

0.3290194675246702 0.4736859884202190 0.6774067316640628  
0.2815482786542719 0.4030860302773366 0.4446530735859911  
0.3779990884174751 0.6507046193407932 0.3506079125151434  
0.4256827027263219 0.7210044236341966 0.5825253690695138  
0.2233894998613914 0.4096714032232282 0.4949491014747693  
0.4780335733808964 0.5743621910918115 0.5255937492803864  
0.4431729505389663 0.4893179125267303 0.5583870494195843  
0.3402971096696796 0.7110799705726151 0.3806174994411267  
0.3742233794705480 0.7605443048430169 0.5408303474081688  
0.4246829979534545 0.4642074013675840 0.4880650138387491  
0.4589349860078193 0.5571760551037940 0.4533989437335242  
0.2566478585634876 0.4569098623651294 0.6571938478212138  
0.5700357494892198 0.5373369411047546 0.5188869520760040  
0.5341475471128563 0.4476353357361202 0.5516179462391363  
0.5250149385370533 0.4244400700054060 0.4804856860498048  
0.5583541722109349 0.5166216669736124 0.4458739230884598  
0.7339503219348839 0.5371237397144482 0.3397962417090027  
0.7254036727633979 0.5996030279860110 0.5496345138636479  
0.7783912620114326 0.5879971797206190 0.4973611396890733  
0.5712630519300297 0.2876849345648933 0.4149888268766364  
0.6239996458924124 0.2466330272355225 0.4526277013929593  
0.6600605385474210 0.2854004666557418 0.6161715214234185  
0.6231884188251404 0.3431332053553158 0.6499931093449333  
0.6602548984025254 0.5241656464869490 0.3240356845207102  
0.5671928540250966 0.5173409440817541 0.6192259828302047  
0.5246435535923790 0.5299505608703101 0.6055160118486976  
0.3026367582229377 0.4607727869515369 0.6370414871130871  
0.2731949968612030 0.4174531095619174 0.4921575803813156  
0.3730587958521179 0.6759382420167053 0.3931343476322481  
0.4031242540241792 0.7203289131978765 0.5383141683353883  
0.4600760104814904 0.5799443065019434 0.4857244006615329  
0.4173500217040830 0.4725737902219483 0.5278108689468595  
0.3592998232252191 0.4656965253214700 0.5842311649483546  
0.3442274984454126 0.4426220870464563 0.5096216898193009  
0.4164707258287378 0.6303836416004373 0.4375380728797780  
0.4320070608395226 0.6533676047601567 0.5132047874229545  
0.2835376852137009 0.4369192439454222 0.5658692163875080  
0.3864938437716251 0.7020822639248695 0.4647333475018929  
0.3137015896144607 0.4553319497797045 0.6018175779282374  
0.2966604565833272 0.4300443517728303 0.5180611142494459  
0.3896937293244607 0.6699980248093230 0.4262873938666180  
0.4070397887835098 0.6957512783372646 0.5103762064307293  
0.4353017764017553 0.6242083868197430 0.4789737383169080  
0.3719225358029229 0.4596167758241173 0.5417402558657425  
0.5836099885508439 0.5314269010924234 0.4743375422171591  
0.5382555144292656 0.4201427500693296 0.5197705164906010

0.6234655201769170 0.5427005813578478 0.4634050162336327  
0.5613317521731311 0.3804633283677712 0.5255163719527061  
0.6378283840052343 0.5351056535330613 0.4163024758240818  
0.6600320892998145 0.5565753002928643 0.4920638275827799  
0.5662025306167460 0.3492854535348647 0.4883496706586115  
0.5839933720865311 0.3689612216484618 0.5657341851718726  
0.6792376099467383 0.5426168216327959 0.3980371210619367  
0.7022099541826501 0.5695225154901306 0.4808481443054753  
0.5900806707175997 0.3100124128137196 0.4887335052783329  
0.6091641194866229 0.3307383310503422 0.5734282110160080  
0.6903338339188828 0.5362709134618104 0.3616069792025710  
0.7136346057663138 0.5613606716513789 0.4316197893076975  
0.7305057570386601 0.5831621775005825 0.5046827608863262  
0.5948055721313781 0.2857732872072702 0.4591758542701520  
0.6118555899888541 0.2999878457656919 0.5328627185256326  
0.6273628640731150 0.3213259836823201 0.6058574009115728  
0.5763955897079198 0.5555138837037885 0.5818531564661144  
0.3814534107934461 0.4813131332947574 0.6065829968679974  
0.3553219485925326 0.4412083487185915 0.4763502000701081  
0.4186973804858953 0.6045932939907569 0.4138706279509068  
0.4453504096988165 0.6443623309928548 0.5442026847206929  
0.2557066374428896 0.4221149119290417 0.5760375735291055  
0.3753453972978417 0.7332553184851950 0.4575183127172528  
0.6126998152050179 0.5209374946896178 0.3981477629844393  
0.6498749269168156 0.5603318768611757 0.5252953268302730  
0.5512535780181048 0.3608786374077385 0.4597419880107093  
0.5835005317036731 0.3936559541457856 0.5890978897448489  
0.7429707128012231 0.5747331508666327 0.4189869976290621  
0.6240232212066376 0.2672571034799172 0.5384461894545064  
0.3292241450224782 0.7194975910478019 0.4071785363314582  
0.2162623159519163 0.4278516431978517 0.5191433012818808  
0.4023543933825062 0.6339193528797197 0.3556779698326196  
0.3124079632626171 0.4010953161637603 0.4443395985227592  
0.5485728257667640 0.3071950881182450 0.4200036696700842  
0.7552662151535623 0.5344261283293599 0.3650718372358794  
0.6470581578034901 0.2508060354406109 0.4758573703613836  
0.5976616249064697 0.3599186342937134 0.6473395915308615  
0.6714406578453070 0.2775929307511258 0.5870230569545617  
0.7852738062191431 0.5678017831054525 0.4734037837669893  
0.6919397837292325 0.6070503820316876 0.5521995552463016  
0.3579014454242687 0.4706974076985062 0.6674180076478169  
0.2389670158467453 0.4586872770114070 0.6316630947891309  
0.3539656868340968 0.7554013960329033 0.5191279463346479  
0.4469186298160897 0.7003830343758902 0.5795844513233983  
0.6325274556119057 0.5297738929430762 0.3347097583441330

**Cr\*-Rh**

1.0000000000000000

30.0000000000000000 0.0000000000000000 0.0000000000000000  
0.0000000000000000 30.0000000000000000 0.0000000000000000  
0.0000000000000000 0.0000000000000000 30.0000000000000000

Rh Cr O C Li H  
1 1 26 36 1 28

Direct

0.4926542187788996 0.4914034952373622 0.4704619428200162  
0.5108148470377027 0.5124608079466085 0.5446236423262691  
0.3298352731533271 0.4736140436503652 0.6815245321772695  
0.2845618446532364 0.4051263530270525 0.4499403477473099  
0.3792639924909097 0.6510799845863090 0.3553993508356939  
0.4260791901329081 0.7240770550313907 0.5853487321311565  
0.2285340716631094 0.4119426544397601 0.4972762645890098  
0.4793538089437867 0.5724250485634338 0.5302297264891881  
0.4486891582239264 0.4907451271993083 0.5614263973915892  
0.3427368960858812 0.7085953739216598 0.3831963627980659  
0.3757016443803604 0.7600261409539301 0.5452623478090581  
0.4325282966525820 0.4688760495064719 0.4908110852752275  
0.4647129643379174 0.5521847602939851 0.4592242759138616  
0.2607582363047818 0.4590160332977964 0.6605673485225727  
0.5688775752833226 0.5340365360214282 0.5206068155701966  
0.5373190121857095 0.4523529852196999 0.5527094052726589  
0.5205196562162434 0.4311767463684812 0.4819822951884615  
0.5526959708412427 0.5135358435099044 0.4496047892172284  
0.7338606643924913 0.5382078335231804 0.3432554047147767  
0.7227004402996959 0.6002839944051206 0.5531293262736554  
0.7756442977256449 0.5892292538326604 0.5032430650201061  
0.5728862336512708 0.2874324670258183 0.4190270647335080  
0.6236391589084042 0.2483841372045133 0.4554583771145223  
0.6590749061745623 0.2891135343492234 0.6200719206047629  
0.6231831435756402 0.3445966238292872 0.6525442365564138  
0.6631539514791954 0.5255356096775875 0.3270445504257242  
0.5195286370138199 0.5315065721592788 0.6033643929663510  
0.5364355112014689 0.5743781817504773 0.6131506464254000  
0.3034753974869585 0.4627897011414272 0.6466991035618077  
0.2729102956698218 0.4174381617265317 0.4916122785633492  
0.3722158220239780 0.6758058166085076 0.3922622219319311  
0.4038787152487916 0.7248764441718712 0.5460981481936240  
0.4620107838184996 0.5798319305934256 0.4913861072796149  
0.4222302818089324 0.4745454254535809 0.5320068221063832  
0.3622897223905498 0.4677220580518940 0.5896146804396281  
0.3469763930883998 0.4452331082458736 0.5131029922292589  
0.4172146448778237 0.6292335056427842 0.4423683406225649  
0.4333475271683183 0.6536781130958051 0.5180389056183239

0.2880165049964048 0.4391422406928636 0.5695800999971582  
0.3885371418485276 0.7013773972859870 0.4687981257281150  
0.3177232854382543 0.4566396428088529 0.6024859421933859  
0.3021791113277955 0.4337519437105704 0.5244031640520479  
0.3923861599640093 0.6689666822483041 0.4340440724726009  
0.4085236821394786 0.6937624243503226 0.5114019111894397  
0.4375198021987933 0.6221730253582215 0.4838363118537363  
0.3762266528792192 0.4616746783712334 0.5455209356287224  
0.5791969008773304 0.5292099233308366 0.4794800753754810  
0.5384639735078181 0.4244805781522348 0.5203232742060813  
0.6248259449486283 0.5417357874061471 0.4645891378374090  
0.5626971066652903 0.3817174643046615 0.5269035929649737  
0.6366459342427956 0.5340379795819825 0.4201458032965263  
0.6556466150116326 0.5587195492232140 0.4951765858779638  
0.5666661554737897 0.3526755645025330 0.4906807331117765  
0.5831178869940424 0.3722254811576167 0.5677544736230229  
0.6805524775350211 0.5438167864350989 0.4046715453572693  
0.7000381112136503 0.5689408245105079 0.4810972012876579  
0.5916230954738665 0.3123646642370971 0.4944616062185878  
0.6082316321445200 0.3320219934010342 0.5731754263961951  
0.6920477732902293 0.5361181494664593 0.3598823115373017  
0.7120560932908937 0.5617147287466755 0.4355652854442094  
0.7315166569706301 0.5856131870301807 0.5116289263927325  
0.5957620259168429 0.2837100611872375 0.4575941352208357  
0.6119088484095614 0.3020487014492865 0.5362990439094931  
0.6293074842651093 0.3223910978829161 0.6139557715060300  
0.4814852109415734 0.5824455491294259 0.5916349459641662  
0.3860374319154309 0.4823525335492566 0.6129481088229566  
0.3593153026133827 0.4434901363167004 0.4789464947541481  
0.4195834245105444 0.6025224707023968 0.4178549011510025  
0.4483464138104795 0.6466168839200449 0.5503730981963297  
0.2564200289911983 0.4243262780783039 0.5801159875548234  
0.3757953087766162 0.7345883434410756 0.4609008725289055  
0.6116807688220881 0.5184597725760980 0.3987776843385055  
0.6451419037344669 0.5617271411105955 0.5298858547231978  
0.5519245949880538 0.3633739373942361 0.4592328414419449  
0.5809141171580154 0.3972608257389831 0.5940654863901911  
0.7433600810927807 0.5755660499423801 0.4230204746159758  
0.6253282751870876 0.2685997665307212 0.5417688319091956  
0.3310491683644456 0.7198526614709365 0.4114291340284250  
0.2194361867804654 0.4294576880700368 0.5231517161569997  
0.4051919040781284 0.6320238779347445 0.3604534678239747  
0.3170151777158854 0.4034019623717154 0.4483521238917598  
0.5491061674586183 0.3092437199681978 0.4232660137984022  
0.7548437157434216 0.5361928131870457 0.3680386771722750  
0.6462089008748405 0.2516638914626786 0.4786613590063167

0.5976268821557424 0.3644724504422880 0.6493415107616781  
0.6700600917024446 0.2799075423305297 0.5908345410492861  
0.7825867685867044 0.5702796084854463 0.4776973597274936  
0.6904880018208679 0.6028803344280024 0.5568758622252177  
0.3608706593501801 0.4695171127938447 0.6727441972917225  
0.2415053959484670 0.4605274771355992 0.6343516298863556  
0.3535807321217715 0.7546935517024813 0.5219743580186124  
0.4531056694086040 0.7063789628954031 0.5818609281877879  
0.6328993379534716 0.5299757440615898 0.3381551008804416

**Au\*-Ag**

1.0000000000000000

30.0000000000000000 0.0000000000000000 0.0000000000000000  
0.0000000000000000 30.0000000000000000 0.0000000000000000  
0.0000000000000000 0.0000000000000000 30.0000000000000000

Au Ag O C Li H  
1 1 26 36 1 28

Direct

0.5141072995066788 0.5154360452903287 0.5716144032113518  
0.4960511066122951 0.4965902476364287 0.4924542357622563  
0.2997579669378932 0.4599142565955872 0.6652829240055458  
0.3024734185150759 0.4010828904002381 0.4272122203910063  
0.3933879276047595 0.6390364553924199 0.3660188550842968  
0.4215376495121445 0.7350877123849351 0.5900645226624055  
0.2388402975012720 0.3987514550687056 0.4641464943391004  
0.4859380001507067 0.5819705287624991 0.5517670568268880  
0.4283607739504778 0.5019477018655505 0.5721607315322628  
0.3539658900620437 0.6982818634768937 0.3848060705170575  
0.3738706908558731 0.7654949650733002 0.5430450939594904  
0.4386133339802574 0.4719375107950222 0.5030694580781705  
0.4693634788641533 0.5526409543345304 0.4834825597831589  
0.2376273748560934 0.4367380527262298 0.6338738184133141  
0.5756056485769431 0.5724275650602483 0.5114343704790063  
0.5451604597685265 0.4519327145612059 0.5714324198198173  
0.5217079758912700 0.4391438844408505 0.4999017552186629  
0.5518942894955301 0.5151618057384328 0.4673864448907998  
0.7127692823589582 0.5141359474054401 0.3222577656520523  
0.7402357143132499 0.5960268912347766 0.5237424215443803  
0.7838616875273625 0.5765107454201187 0.4680910789861271  
0.5630231497136908 0.2995483334517016 0.4193351151764725  
0.6137324178365376 0.2550874971153398 0.4487898420434507  
0.6610065159910715 0.2778362033013940 0.6135845105914202  
0.6310889679578382 0.3324184165193240 0.6528154828818411  
0.6393963264723553 0.5097183326540136 0.3174945223798432  
0.5607725360417817 0.6019335947797556 0.6229671677979819  
0.5495282348603022 0.5602451208178123 0.6322290977886795

0.2806729003330173 0.4475270735684523 0.6266685009779008  
0.2825323685532040 0.4093611566695156 0.4665948369795098  
0.3831603076678022 0.6673062328162976 0.3994324031647180  
0.4023086685149359 0.7312463824404671 0.5496864276478696  
0.4675833912837699 0.5833098559408856 0.5127522738899877  
0.4156206922489114 0.4802228270957925 0.5388297732126317  
0.3464180582974040 0.4632568862030140 0.5805902275447069  
0.3485366867720794 0.4432306452761379 0.5022521122911486  
0.4251655746246138 0.6269604383581250 0.4568409983347081  
0.4351999950528112 0.6583145138917632 0.5310997526688875  
0.2814337285326660 0.4273510170134106 0.5466729873767068  
0.3934162180720000 0.7002400079656516 0.4742156957025677  
0.3023133080160119 0.4460968880186277 0.5849725793300227  
0.3038678119568485 0.4265214886135629 0.5047831943839629  
0.4002821239226118 0.6650058423244199 0.4430370160015739  
0.4102039266502465 0.6969797485082164 0.5186587541698606  
0.4424619505868786 0.6242307348499577 0.5001049379250597  
0.3690966098689814 0.4610851217963631 0.5399757971041559  
0.5802598776076395 0.5447741828185082 0.4800986546574152  
0.5421353519165916 0.4283892748916623 0.5356029153684305  
0.6239975780584610 0.5456312814038290 0.4555265980259092  
0.5650097274665407 0.3841311300186206 0.5357658729206481  
0.6282845338388473 0.5293913402969668 0.4120949901627625  
0.6608593109790445 0.5624781870671186 0.4784340274605678  
0.5649889567227714 0.3585030964723317 0.4967721649904828  
0.5875883097113238 0.3696720350333110 0.5738501763335336  
0.6702639595125097 0.5323101625647280 0.3894908340854851  
0.7039397511302715 0.5635008891577002 0.4582092795663895  
0.5875576788249249 0.3166158203452865 0.4953222428687223  
0.6105431273480370 0.3279106924051061 0.5739126217135113  
0.6739951450311209 0.5190492779915489 0.3446132117415133  
0.7077847883353238 0.5496178284799494 0.4129231851686858  
0.7412679014077865 0.5782703326701816 0.4825334630404909  
0.5878901546457570 0.2912654405435822 0.4558339305847465  
0.6096877142934801 0.3012287392773631 0.5345158859358354  
0.6333127897777866 0.3133109787954431 0.6122707915260527  
0.5489877856615173 0.5943356272927526 0.5611708825118916  
0.3638308500579064 0.4800248591383927 0.6078350268893496  
0.3670364867298628 0.4442257472736117 0.4709207839464337  
0.4298571289443173 0.5981014586948987 0.4352089044448829  
0.4470011242477080 0.6530897339522066 0.5651259641886884  
0.2501412061573215 0.4090020937150542 0.5504203713332159  
0.3802907407786238 0.7321034575435129 0.4623910363467592  
0.5993496441016990 0.5132933660704385 0.3970025146583857  
0.6551314249228631 0.5734527648580294 0.5126640568999214  
0.5488301523610656 0.3727666032131355 0.4674990694011774



|                    |                    |                    |
|--------------------|--------------------|--------------------|
| 0.5884118033384746 | 0.3923052807472873 | 0.6023269691385519 |
| 0.7383243622911727 | 0.5571527522123915 | 0.3944868403376514 |
| 0.6210736992713297 | 0.2666355310439155 | 0.5361287534460341 |
| 0.3398142857033258 | 0.7120542239535897 | 0.4106778318236468 |
| 0.2232839376157374 | 0.4135410294258190 | 0.4886081620070878 |
| 0.4187432098495169 | 0.6208715939577547 | 0.3752977896487693 |
| 0.3346936126913644 | 0.4033946555035216 | 0.4312668632801869 |
| 0.5405745890898858 | 0.3218437961361728 | 0.4269742057903602 |
| 0.7369925891318018 | 0.5122824373741468 | 0.3439107228812452 |
| 0.6378211429483789 | 0.2553160540442042 | 0.4706934934223004 |
| 0.6069542167092553 | 0.3542760069077069 | 0.6528924611297336 |
| 0.6691722017543352 | 0.2701491323281807 | 0.5830381048532614 |
| 0.7852583493770364 | 0.5566378166885426 | 0.4423798158178401 |
| 0.7092925212919976 | 0.6003289944182464 | 0.5327363964690234 |
| 0.3317435682264178 | 0.4635487692103600 | 0.6603674802268739 |
| 0.2223868810806719 | 0.4353686654286776 | 0.6051894344794242 |
| 0.3536657297320331 | 0.7574490693631167 | 0.5188134231494351 |
| 0.4461481084811794 | 0.7138867299650939 | 0.5921423975517941 |
| 0.6120588975750192 | 0.5198285139855775 | 0.3319884680520949 |

**V\*-Fe**

1.0000000000000000

|                     |                     |                     |
|---------------------|---------------------|---------------------|
| 30.0000000000000000 | 0.0000000000000000  | 0.0000000000000000  |
| 0.0000000000000000  | 30.0000000000000000 | 0.0000000000000000  |
| 0.0000000000000000  | 0.0000000000000000  | 30.0000000000000000 |

Fe V O C Li H

1 1 26 36 1 28

**Direct**

|                    |                    |                    |
|--------------------|--------------------|--------------------|
| 0.4951122440388543 | 0.4960988033002473 | 0.4818868117748429 |
| 0.5116319524739028 | 0.5123826027753912 | 0.5494233814363257 |
| 0.3312321251521952 | 0.4729026565853509 | 0.6798378932023036 |
| 0.2852701489090515 | 0.4055434550523309 | 0.4480297648868590 |
| 0.3803948411964060 | 0.6484441468577216 | 0.3559371513088458 |
| 0.4261128855010006 | 0.7272181228380404 | 0.5839147733566763 |
| 0.2292580162164174 | 0.4123137171740727 | 0.4954179970865067 |
| 0.4781780120786596 | 0.5747299974726010 | 0.5357338476377370 |
| 0.4501919862864368 | 0.4836878298693671 | 0.5641119681842212 |
| 0.3436277768913065 | 0.7062685085830716 | 0.3827274177475146 |
| 0.3743458282574505 | 0.7614366994051018 | 0.5438025904124206 |
| 0.4361717241010974 | 0.4733924477141686 | 0.4916410227378229 |
| 0.4676936054728280 | 0.5516272581386555 | 0.4657006229284173 |
| 0.2618302593014472 | 0.4595186756822529 | 0.6591544628301265 |
| 0.5716116892265956 | 0.5338794662461370 | 0.5225566936171626 |
| 0.5396089487974218 | 0.4539894411008205 | 0.5576786704176557 |
| 0.5200310880964425 | 0.4378793902469929 | 0.4873354632221811 |

0.5494782247974772 0.5146375671505947 0.4540717851696120  
0.7328503809608304 0.5375224694794111 0.3423843325635379  
0.7223141287182837 0.5995171554878981 0.5517645514998212  
0.7753159709230141 0.5898439288180078 0.5014817584646929  
0.5710461395419195 0.2902730138909355 0.4187534901376857  
0.6218205249768372 0.2509637946113545 0.4549287925719011  
0.6581731757215341 0.2888150592641776 0.6195954293915260  
0.6232554190039579 0.3445741466167730 0.6526287715671893  
0.6622463867206269 0.5245689281554614 0.3257500052813834  
0.4983637547793546 0.5287380367881748 0.6120002142113493  
0.5400176659639773 0.5486573829889978 0.5968000631591684  
0.3045767055563534 0.4623618700401720 0.6451469718817963  
0.2736620058676270 0.4177028325352188 0.4897720530417060  
0.3732361232058448 0.6737521290731057 0.3923819852085105  
0.4029991865261615 0.7266855746541920 0.5451114791067618  
0.4624760391868382 0.5808864000905437 0.4961946637580572  
0.4239602914054973 0.4723964611930580 0.5326999009420407  
0.3634492004934963 0.4654554883890228 0.5883057967191437  
0.3481477791490497 0.4445305627635957 0.5112895542918233  
0.4183562247560753 0.6284335449313401 0.4440526293547175  
0.4324873792761642 0.6548052661018621 0.5194771322510666  
0.2888941710550340 0.4387762192193631 0.5678042127561439  
0.3886468747497534 0.7011421725237883 0.4682052787745686  
0.3186708826867405 0.4555847966061190 0.6009486938294899  
0.3031234761781694 0.4335702437187121 0.5226056470431245  
0.3932169199988716 0.6677853673372951 0.4343598938760404  
0.4078671261194971 0.6947013073829547 0.5112452880782292  
0.4377650112700928 0.6224878279794203 0.4861125618776971  
0.3775394956665801 0.4595921237551301 0.5442167955925358  
0.5793976781003444 0.5292044542829102 0.4810596944118686  
0.5394715673500733 0.4272784674998514 0.5240387724198305  
0.6243735473058558 0.5409247820060171 0.4640097650293193  
0.5628123095650626 0.3840942633601923 0.5280516811151357  
0.6354457037711074 0.5332879357301366 0.4193314490697816  
0.6557815123437993 0.5577698534771662 0.4941422092406654  
0.5660270060755175 0.3557345766910128 0.4910685700114693  
0.5835751585775742 0.3735420147755361 0.5685177103113128  
0.6793445822837630 0.5431492453355257 0.4034870456562436  
0.6998648113422213 0.5682969694268833 0.4796564767923306  
0.5903948005295214 0.3148999364520498 0.4942893534770186  
0.6080746502682988 0.3330527344948646 0.5731613038697344  
0.6908931724171368 0.5353470541628710 0.3587305345847004  
0.7111906260770479 0.5612573296770332 0.4339705498064537  
0.7312634140179524 0.5853457537350721 0.5100426805172472  
0.5941413321381970 0.2864456247914350 0.4572092012963229  
0.6108624019786493 0.3035736389483579 0.5358483065880776

0.6289604389208294 0.3226340807335956 0.6138332622070232  
0.4921658622952367 0.5869186790966039 0.5946953205008542  
0.3876420689812435 0.4795280382552921 0.6115612253202590  
0.3601718383573715 0.4434490377236646 0.4769876567904958  
0.4213696337492391 0.6012299642330657 0.4201271261369142  
0.4451785747498413 0.6476198521179752 0.5527697978652690  
0.2570468381490316 0.4243117597552860 0.5781523124737369  
0.3759967231797945 0.7341377988763333 0.4592957568792897  
0.6102535087464640 0.5177696739178105 0.3981695075017124  
0.6456023032523095 0.5603426262100472 0.5289810082669234  
0.5515262580445833 0.3670426675954693 0.4596981674056352  
0.5819988647857482 0.3983089436530524 0.5951076921383996  
0.7422060454186781 0.5753538602747322 0.4209842466509740  
0.6231599311720840 0.2696301771362133 0.5408663406988402  
0.3318430939855849 0.7179670260996310 0.4107329916112790  
0.2201372559378569 0.4296578305616619 0.5214116991326325  
0.4065940276100088 0.6298510073156752 0.3610396531608770  
0.3177017098627398 0.4032378624978840 0.4466440792501771  
0.5468669487767074 0.3115922124432955 0.4232857802760918  
0.7535184142370615 0.5358829341094139 0.3674811367573810  
0.6445441814055324 0.2544372929692647 0.4779899206305909  
0.5979039705082188 0.3647647097518020 0.6496120419280035  
0.6690366952088427 0.2797879446506790 0.5902459408992190  
0.7826269565015460 0.5707638474348458 0.4761072065454102  
0.6900090585134520 0.6012733909249690 0.5553677700123062  
0.3622440558138424 0.4692789727415750 0.6706353443964236  
0.2425222992144159 0.4608325846901786 0.6329801938556351  
0.3514968097030350 0.7549800416483436 0.5215093551015588  
0.4532263940560451 0.7097650091439510 0.5796681142224646  
0.6318930324673836 0.5296978032683983 0.3363070844305570

**Y\*-Sc**

1.0000000000000000

30.0000000000000000 0.0000000000000000 0.0000000000000000  
0.0000000000000000 30.0000000000000000 0.0000000000000000  
0.0000000000000000 0.0000000000000000 30.0000000000000000

Y Sc O C Li H

1 1 26 36 1 28

**Direct**

0.5162216277322369 0.5181416319487400 0.5691899476696811  
0.4902053226498896 0.4879739322612705 0.4594198441628697  
0.3286414524173868 0.4735353720355940 0.6802635147834853  
0.2815337053218751 0.4041644134338416 0.4491510668605826  
0.3800809536954984 0.6498274484183238 0.3559180507002709  
0.4248572085153173 0.7297961095945107 0.5835569094112207  
0.2257702957120530 0.4114926520470872 0.4968208804140544

0.4785268101171249 0.5789282005458893 0.5362647573533575  
0.4467619060101219 0.4868410847543908 0.5607767743988945  
0.3427936472056333 0.7075639814264582 0.3824614041019679  
0.3726484220558230 0.7635839952845555 0.5435208459156979  
0.4317596680977207 0.4675635721818315 0.4898881192994068  
0.4662789793548154 0.5528119597419822 0.4670896650478603  
0.2593967191690840 0.4590831021820515 0.6600468272863201  
0.5709001734621441 0.5359689223331415 0.5182819304471389  
0.5414266420534901 0.4474410318138881 0.5589374411902513  
0.5222462161845608 0.4333635472019047 0.4876512956592687  
0.5529767673367729 0.5145871488111006 0.4486831657795665  
0.7366244923243704 0.5380145510107417 0.3417270355794325  
0.7236122918576696 0.6000133751811819 0.5513897475843061  
0.7770619012163551 0.5896754191655148 0.5017816536303671  
0.5738616258345065 0.2851835783691316 0.4180201828293069  
0.6248359166871219 0.2462355477173832 0.4543100760323308  
0.6612755187281083 0.2845679612070456 0.6192767467132319  
0.6251654581090296 0.3397650010457597 0.6520104309589301  
0.6660742652658028 0.5254609788478606 0.3245018279641737  
0.4930092828240027 0.5514229262061154 0.6283108323846852  
0.5372107660480860 0.5713083634632142 0.6127649495049867  
0.3019874519641564 0.4625995613151875 0.6457435216253649  
0.2701289062438195 0.4166555401639382 0.4908854811718267  
0.3725930027179817 0.6752513038520189 0.3922992086036274  
0.4014143532720659 0.7289020516587250 0.5449391676016058  
0.4618539957652517 0.5831797827641840 0.4970193085432209  
0.4202530866516768 0.4720913583955549 0.5311524301896462  
0.3603279549052062 0.4663685908254885 0.5882365311871676  
0.3444995164841945 0.4437234329820932 0.5117705528910000  
0.4178114023050518 0.6303448059364891 0.4441699802601037  
0.4310561082362225 0.6569396393159213 0.5197393005502560  
0.2857301002865966 0.4383914698042749 0.5687598375951286  
0.3872619592535526 0.7029772555041893 0.4680981573834069  
0.3157955893720791 0.4558856840260780 0.6014521441438078  
0.2996780982850499 0.4327569958896255 0.5234763966522924  
0.3923864331080106 0.6695257205117883 0.4343265049432905  
0.4063306904361821 0.6967271029691521 0.5112870925743453  
0.4368978757756298 0.6244881334257517 0.4864088639830705  
0.3740948363986874 0.4598614262371593 0.5440775110390539  
0.5809634141822018 0.5302219516502971 0.4774705690234289  
0.5414464852060196 0.4223218867295312 0.5245457751062937  
0.6265130384454534 0.5417643200031224 0.4619603891930438  
0.5649356029692721 0.3788874200735300 0.5275136132255005  
0.6385821761132465 0.5339362887023573 0.4175231954535170  
0.6573503298819018 0.5588413091407729 0.4926126777391902  
0.5682515049659260 0.3505355475484094 0.4905177590331681

|                    |                    |                    |
|--------------------|--------------------|--------------------|
| 0.5856092191973087 | 0.3680268492848335 | 0.5679788396140273 |
| 0.6826507247105641 | 0.5437735225553211 | 0.4023898404613885 |
| 0.7018134844785021 | 0.5689730080880866 | 0.4789677404167372 |
| 0.5928721260560774 | 0.3098088710467899 | 0.4936668413557455 |
| 0.6104476481959381 | 0.3277839275720548 | 0.5726201578395962 |
| 0.6945676281108013 | 0.5359862758380753 | 0.3577442080462126 |
| 0.7140918468057883 | 0.5617411806786902 | 0.4334307330314496 |
| 0.7328912108290750 | 0.5857191611011671 | 0.5097779013158841 |
| 0.5968602029229977 | 0.2814747487536052 | 0.4565558675863527 |
| 0.6135770236151042 | 0.2984565827193523 | 0.5351686183081801 |
| 0.6314263684945510 | 0.3177531050763625 | 0.6133067160095446 |
| 0.4876384581224294 | 0.6029023603536312 | 0.5961349332479322 |
| 0.3843396177396021 | 0.4812970933336121 | 0.6111341159763912 |
| 0.3564459485821728 | 0.4419287469416635 | 0.4774668425009379 |
| 0.4211015825947884 | 0.6031673604075179 | 0.4202201694515126 |
| 0.4422846895401162 | 0.6497284162990543 | 0.5535056721085967 |
| 0.2543205301749063 | 0.4233969385262452 | 0.5796204689475454 |
| 0.3751107338702111 | 0.7360718287361798 | 0.4588310392635154 |
| 0.6138771272682705 | 0.5182791716124427 | 0.3959047795077239 |
| 0.6465648929581359 | 0.5620766701668571 | 0.5272007235914921 |
| 0.5535819158940045 | 0.3617417141220522 | 0.4591641286055692 |
| 0.5837670352793116 | 0.3926432802049951 | 0.5946600060746144 |
| 0.7451842151932776 | 0.5760816662649837 | 0.4209135855078679 |
| 0.6261410270993901 | 0.2645887894192067 | 0.5400854121980793 |
| 0.3310938033090755 | 0.7192003970342519 | 0.4105596228115611 |
| 0.2170286445419580 | 0.4290896105165060 | 0.5227896192191125 |
| 0.4064960235472154 | 0.6316319824952255 | 0.3614037559345085 |
| 0.3139544771224549 | 0.4017420815677160 | 0.4477405018136693 |
| 0.5493618369760651 | 0.3060695111238284 | 0.4226974337058986 |
| 0.7570967096513117 | 0.5362810705588975 | 0.3669922193431845 |
| 0.6473605910929516 | 0.2498117449428324 | 0.4775688719888512 |
| 0.5993653500365462 | 0.3593290194292424 | 0.6487725447239573 |
| 0.6723863799175227 | 0.2756938220080279 | 0.5899829197449616 |
| 0.7843532831321167 | 0.5708073591589597 | 0.4762671127284262 |
| 0.6913482731809778 | 0.6028436791737795 | 0.5545214662067670 |
| 0.3596722650405373 | 0.4706189104915980 | 0.6709269991592263 |
| 0.2399121309569624 | 0.4602640377764358 | 0.6339963808086756 |
| 0.3497364795244935 | 0.7566528103803285 | 0.5214247684880322 |
| 0.4526408428759944 | 0.7135523467445261 | 0.5787766160086969 |
| 0.6357435671484811 | 0.5308431151055489 | 0.3349712354049627 |

**Ag\*-Au**

|                     |                     |                     |
|---------------------|---------------------|---------------------|
| 1.0000000000000000  |                     |                     |
| 30.0000000000000000 | 0.0000000000000000  | 0.0000000000000000  |
| 0.0000000000000000  | 30.0000000000000000 | 0.0000000000000000  |
| 0.0000000000000000  | 0.0000000000000000  | 30.0000000000000000 |

Au Ag O C Li H  
1 1 26 36 1 28

Direct

0.4960511066122951 0.4965902476364287 0.4924542357622563  
0.5141072995066788 0.5154360452903287 0.5716144032113518  
0.2997579669378932 0.4599142565955872 0.6652829240055458  
0.3024734185150759 0.4010828904002381 0.4272122203910063  
0.3933879276047595 0.6390364553924199 0.3660188550842968  
0.4215376495121445 0.7350877123849351 0.5900645226624055  
0.2388402975012720 0.3987514550687056 0.4641464943391004  
0.4859380001507067 0.5819705287624991 0.5517670568268880  
0.4283607739504778 0.5019477018655505 0.5721607315322628  
0.3539658900620437 0.6982818634768937 0.3848060705170575  
0.3738706908558731 0.7654949650733002 0.5430450939594904  
0.4386133339802574 0.4719375107950222 0.5030694580781705  
0.4693634788641533 0.5526409543345304 0.4834825597831589  
0.2376273748560934 0.4367380527262298 0.6338738184133141  
0.5756056485769431 0.5724275650602483 0.5114343704790063  
0.5451604597685265 0.4519327145612059 0.5714324198198173  
0.5217079758912700 0.4391438844408505 0.4999017552186629  
0.5518942894955301 0.5151618057384328 0.4673864448907998  
0.7127692823589582 0.5141359474054401 0.3222577656520523  
0.7402357143132499 0.5960268912347766 0.5237424215443803  
0.7838616875273625 0.5765107454201187 0.4680910789861271  
0.5630231497136908 0.2995483334517016 0.4193351151764725  
0.6137324178365376 0.2550874971153398 0.4487898420434507  
0.6610065159910715 0.2778362033013940 0.6135845105914202  
0.6310889679578382 0.3324184165193240 0.6528154828818411  
0.6393963264723553 0.5097183326540136 0.3174945223798432  
0.5607725360417817 0.6019335947797556 0.6229671677979819  
0.5495282348603022 0.5602451208178123 0.6322290977886795  
0.2806729003330173 0.4475270735684523 0.6266685009779008  
0.2825323685532040 0.4093611566695156 0.4665948369795098  
0.3831603076678022 0.6673062328162976 0.3994324031647180  
0.4023086685149359 0.7312463824404671 0.5496864276478696  
0.4675833912837699 0.5833098559408856 0.5127522738899877  
0.4156206922489114 0.4802228270957925 0.5388297732126317  
0.3464180582974040 0.4632568862030140 0.5805902275447069  
0.3485366867720794 0.4432306452761379 0.5022521122911486  
0.4251655746246138 0.6269604383581250 0.4568409983347081  
0.4351999950528112 0.6583145138917632 0.5310997526688875  
0.2814337285326660 0.4273510170134106 0.5466729873767068  
0.3934162180720000 0.7002400079656516 0.4742156957025677  
0.3023133080160119 0.4460968880186277 0.5849725793300227  
0.3038678119568485 0.4265214886135629 0.5047831943839629  
0.4002821239226118 0.6650058423244199 0.4430370160015739

0.4102039266502465 0.6969797485082164 0.5186587541698606  
0.4424619505868786 0.6242307348499577 0.5001049379250597  
0.3690966098689814 0.4610851217963631 0.5399757971041559  
0.5802598776076395 0.5447741828185082 0.4800986546574152  
0.5421353519165916 0.4283892748916623 0.5356029153684305  
0.6239975780584610 0.5456312814038290 0.4555265980259092  
0.5650097274665407 0.3841311300186206 0.5357658729206481  
0.6282845338388473 0.5293913402969668 0.4120949901627625  
0.6608593109790445 0.5624781870671186 0.4784340274605678  
0.5649889567227714 0.3585030964723317 0.4967721649904828  
0.5875883097113238 0.3696720350333110 0.5738501763335336  
0.6702639595125097 0.5323101625647280 0.3894908340854851  
0.7039397511302715 0.5635008891577002 0.4582092795663895  
0.5875576788249249 0.3166158203452865 0.4953222428687223  
0.6105431273480370 0.3279106924051061 0.5739126217135113  
0.6739951450311209 0.5190492779915489 0.3446132117415133  
0.7077847883353238 0.5496178284799494 0.4129231851686858  
0.7412679014077865 0.5782703326701816 0.4825334630404909  
0.5878901546457570 0.2912654405435822 0.4558339305847465  
0.6096877142934801 0.3012287392773631 0.5345158859358354  
0.6333127897777866 0.3133109787954431 0.6122707915260527  
0.5489877856615173 0.5943356272927526 0.5611708825118916  
0.3638308500579064 0.4800248591383927 0.6078350268893496  
0.3670364867298628 0.4442257472736117 0.4709207839464337  
0.4298571289443173 0.5981014586948987 0.4352089044448829  
0.4470011242477080 0.6530897339522066 0.5651259641886884  
0.2501412061573215 0.4090020937150542 0.5504203713332159  
0.3802907407786238 0.7321034575435129 0.4623910363467592  
0.5993496441016990 0.5132933660704385 0.3970025146583857  
0.6551314249228631 0.5734527648580294 0.5126640568999214  
0.5488301523610656 0.3727666032131355 0.4674990694011774  
0.5884118033384746 0.3923052807472873 0.6023269691385519  
0.7383243622911727 0.5571527522123915 0.3944868403376514  
0.6210736992713297 0.2666355310439155 0.5361287534460341  
0.3398142857033258 0.7120542239535897 0.4106778318236468  
0.2232839376157374 0.4135410294258190 0.4886081620070878  
0.4187432098495169 0.6208715939577547 0.3752977896487693  
0.3346936126913644 0.4033946555035216 0.4312668632801869  
0.5405745890898858 0.3218437961361728 0.4269742057903602  
0.7369925891318018 0.5122824373741468 0.3439107228812452  
0.6378211429483789 0.2553160540442042 0.4706934934223004  
0.6069542167092553 0.3542760069077069 0.6528924611297336  
0.6691722017543352 0.2701491323281807 0.5830381048532614  
0.7852583493770364 0.5566378166885426 0.4423798158178401  
0.7092925212919976 0.6003289944182464 0.5327363964690234  
0.3317435682264178 0.4635487692103600 0.6603674802268739

0.2223868810806719 0.4353686654286776 0.6051894344794242  
0.3536657297320331 0.7574490693631167 0.5188134231494351  
0.4461481084811794 0.7138867299650939 0.5921423975517941  
0.6120588975750192 0.5198285139855775 0.3319884680520949

**Mn\*-Cd**

1.0000000000000000  
30.0000000000000000 0.0000000000000000 0.0000000000000000  
0.0000000000000000 30.0000000000000000 0.0000000000000000  
0.0000000000000000 0.0000000000000000 30.0000000000000000

Cd Mn O C Li H  
1 1 26 36 1 28

**Direct**

0.4912054985015377 0.4913679387641973 0.4670438973416811  
0.5055249473801751 0.5148832192988099 0.5648928000138866  
0.3190993005783764 0.4691912774013666 0.6778364434482972  
0.2790117107974948 0.4011274626535832 0.4454295718556341  
0.3759776396972689 0.6542434952158941 0.3485771045648640  
0.4245768059517536 0.7213442857545820 0.5796322427507539  
0.2222556566446052 0.4075270781053729 0.4918274682065975  
0.4757201273973468 0.5716623961928430 0.5213558216292955  
0.4376808304078709 0.4859496508259386 0.5682138940695143  
0.3397694055578599 0.7113312456454998 0.3778593380679846  
0.3755397642603435 0.7594365043359292 0.5402700658544690  
0.4301790327896295 0.4702377716927915 0.4946560906960953  
0.4614730341978132 0.5511713984408495 0.4501409731656769  
0.2502229576914032 0.4546581632577493 0.6564764091741515  
0.5783539873266782 0.5396919727910364 0.5246529096378736  
0.5349585361566335 0.4472446015589220 0.5472958051072120  
0.5195365890300191 0.4290947983154358 0.4755601014960442  
0.5552432819277240 0.5174849614607711 0.4568529667295110  
0.7323067311173359 0.5361589431081375 0.3373640730601635  
0.7331599356121985 0.6021844832759550 0.5457672446060016  
0.7839565911126535 0.5889714587126924 0.4939226822123693  
0.5730307751853473 0.2816067661815066 0.4141634112693650  
0.6237541967681633 0.2436181421784339 0.4517216146190693  
0.6576881605129768 0.2871246805966593 0.6156604506565646  
0.6231256290132731 0.3441856323112564 0.6462810905112458  
0.6607185921521679 0.5250769601651216 0.3243690039271914  
0.5763818704021694 0.5211600049287575 0.6312944616577394  
0.5399861269015030 0.5495667604130495 0.6172685765537878  
0.2929458798595949 0.4586417352736410 0.6429139908092325  
0.2666441567935284 0.4135165827191268 0.4868467311678825  
0.3692782578376504 0.6782609658618797 0.3859723107427528  
0.4024821343720916 0.7233565285331544 0.5405730949367569



0.4590059486795336 0.5784793533567665 0.4830017595170776  
0.4155073742773577 0.4725311351675170 0.5344840731962686  
0.3524249620421485 0.4641780299627798 0.5871717801195450  
0.3403451222666938 0.4422972117921245 0.5101107189587269  
0.4143528419849281 0.6299679283830335 0.4346077514117922  
0.4306091886528092 0.6519862425056424 0.5109007649037405  
0.2794440770688972 0.4352185118727229 0.5648259912818262  
0.3864829126327449 0.7016243162629259 0.4629115649373087  
0.3077758911960402 0.4527548515781057 0.5987373771099513  
0.2951629366934192 0.4301988032139495 0.5201394300591321  
0.3897023391180824 0.6701478979759745 0.4273943039753552  
0.4064067066627693 0.6927077234270820 0.5051862298979913  
0.4345006657457179 0.6215607448692718 0.4757529340457595  
0.3682102400928718 0.4586842345345800 0.5437038747763022  
0.5847384309328090 0.5330274295725075 0.4832204759394935  
0.5370927396448752 0.4214249718793411 0.5138126728024136  
0.6298419232761074 0.5438921807949160 0.4640852705447311  
0.5625506118120001 0.3786333994635062 0.5197635323067491  
0.6387830006051196 0.5355963421997698 0.4190904653073081  
0.6632564010634228 0.5604499512814739 0.4920852774866472  
0.5668129003742042 0.3490881805914411 0.4840350490405652  
0.5829747023339380 0.3698049753080911 0.5607738239968053  
0.6820719155968903 0.5441835164367712 0.4008979348986264  
0.7069299275545116 0.5697945987990453 0.4754726288420047  
0.5915792410537298 0.3086411307797032 0.4888691964840218  
0.6080752882182752 0.3298025169835261 0.5671680867971520  
0.6911811111873314 0.5354273838160503 0.3557352626618037  
0.7158509766267906 0.5618394524504194 0.4294389750295048  
0.7401360115534216 0.5864434024121929 0.5041281074230807  
0.5958742033508992 0.2789853018981073 0.4528166888272521  
0.6115796080454264 0.2990666994134806 0.5309736177215585  
0.6287907895662878 0.3208311123120514 0.6083981179356431  
0.5909929754104146 0.5544275793534205 0.5831051255897302  
0.3755170484674454 0.4790536794045975 0.6110263263763128  
0.3536372163956030 0.4407752280997441 0.4762576000853485  
0.4165979919792724 0.6038688129301687 0.4093929263475325  
0.4452667017867226 0.6424684201260779 0.5428521116815582  
0.2474945079634849 0.4203881379003817 0.5742694126707041  
0.3735550291513989 0.7349812390260019 0.4559667257437232  
0.6122069034252217 0.5205517790349983 0.3992857943678306  
0.6559929136866546 0.5633755047298044 0.5275683651086895  
0.5521077656180271 0.3591420452367189 0.4523287965638336  
0.5800824363997653 0.3952810169028505 0.5865747467023261  
0.7466430144324295 0.5748804461227418 0.4149286900452076  
0.6248636891286016 0.2656377799234342 0.5371195163940565  
0.3283231425087592 0.7219682330285717 0.4064309994775019

0.2123955756019726 0.4252399091163789 0.5173076827811545  
0.4015904220279046 0.6347586183573148 0.3533718944317578  
0.3114493378511019 0.3990865221599122 0.4444579810744484  
0.5489730832687100 0.3032080414316666 0.4179532414077364  
0.7542529967417019 0.5343541628863594 0.3613672002101679  
0.6463027674181783 0.2477421452269577 0.4748329705942563  
0.5991344882560347 0.3658395160636416 0.6421395719281138  
0.6681356525315990 0.2762076589153089 0.5868595627306749  
0.7898407410100241 0.5685061749618537 0.4693139010635717  
0.7015041680977334 0.6088952244475417 0.5490396573858868  
0.3502585978865601 0.4670383944332809 0.6685607742387054  
0.2310784466121047 0.4557803923143282 0.6302135611353517  
0.3534922956227353 0.7555645737951177 0.5166367951421794  
0.4475815281721375 0.6984259044461393 0.5775806903340709  
0.6310790721024354 0.5308074706922005 0.3364287784117931

**Os\*-Fe**

1.0000000000000000

30.0000000000000000 0.0000000000000000 0.0000000000000000  
0.0000000000000000 30.0000000000000000 0.0000000000000000  
0.0000000000000000 0.0000000000000000 30.0000000000000000

Os Fe O C Li H

1 1 26 36 1 28

**Direct**

0.5096089753785832 0.5118799449917228 0.5419264943568686  
0.4931650377120320 0.4912431742491687 0.4717131506682656  
0.3290058344719388 0.4731956390634451 0.6815496073259797  
0.2834582779682976 0.4047788025905377 0.4500518494925257  
0.3787595505678431 0.6519430056629525 0.3554898462148913  
0.4256661762450678 0.7251954933135706 0.5853171107646975  
0.2273936411133715 0.4115678901772306 0.4973203506041249  
0.4788867896233660 0.5736912710485333 0.5297375112202799  
0.4474991714444712 0.4897194994217396 0.5617756276653303  
0.3420477447576842 0.7095691745024592 0.3828547079792270  
0.3749802232706902 0.7610765949753002 0.5456311132732471  
0.4321572080873373 0.4695620170301425 0.4906354143244093  
0.4648586074636659 0.5534238785350674 0.4587094986300249  
0.2598129168898634 0.4587953006480726 0.6607341812105320  
0.5700461602352065 0.5345511572752008 0.5198823696310279  
0.5384190227239734 0.4512112317284101 0.5534500166697757  
0.5201396694906842 0.4302663643881194 0.4832446567810861  
0.5527063648569109 0.5136716759100982 0.4494878582302226  
0.7348476546792807 0.5381569533645241 0.3426928979310001  
0.7232253651104689 0.6001732978157499 0.5529875739876945  
0.7763282840139295 0.5891813222453270 0.5032486667986518  
0.5734102963787300 0.2866872844405375 0.4193590099066998

0.6242850346462929 0.2475032542814921 0.4553979267590494  
0.6599583587492938 0.2879720973751747 0.6204579097180114  
0.6239249081054381 0.3433682456122571 0.6529027361643106  
0.6640367310561059 0.5257048221961854 0.3266781202932063  
0.5236593401446215 0.5307663722257495 0.6051197903015019  
0.5360846994549169 0.5747525958376974 0.6157509833689880  
0.3024874586069578 0.4625454726711735 0.6467587828323189  
0.2717434964891760 0.4172276454078293 0.4916708704270532  
0.3716025197007377 0.6769401373876583 0.3921780439317525  
0.4032663739435137 0.7260275647999183 0.5461858388650949  
0.4615166531389020 0.5811281829673155 0.4902994931124431  
0.4208932329454884 0.4740708854978262 0.5315016917469956  
0.3611585302614481 0.4674802681185791 0.5896204897824965  
0.3457782701917171 0.4450303880552841 0.5130407646255958  
0.4167146881006522 0.6307040728224635 0.4422462909414622  
0.4328559868074071 0.6550049271732329 0.5179526368039861  
0.2868653185011802 0.4389869560409054 0.5695854004562347  
0.3878266723734871 0.7027086347912387 0.4687886800788749  
0.3166225299153848 0.4564136062118344 0.6024785125805175  
0.3010004503659686 0.4335988030656068 0.5244365849651067  
0.3917371575401978 0.6703396383840275 0.4339797345346759  
0.4079024439184580 0.6950346658841049 0.5113575444073755  
0.4371048623035613 0.6235395825382083 0.4836275714410636  
0.3751054404483740 0.4614243665987854 0.5454439677021296  
0.5799613769541511 0.5295063918762724 0.4782491188599101  
0.5388956939778755 0.4229621873153157 0.5208177693890718  
0.6255211580382508 0.5421807695419959 0.4638816207311572  
0.5633023736863029 0.3804942706523615 0.5275961643588283  
0.6375103602394476 0.5344941925298557 0.4194860929510872  
0.6563345133553232 0.5591367469815011 0.4945903845873287  
0.5671774641708205 0.3514999980706461 0.4912723495792448  
0.5839098206014948 0.3709244387096822 0.5683736623273018  
0.6815489291779132 0.5441452603797488 0.4041819485773237  
0.7007941530782789 0.5691873708506691 0.4806995583667342  
0.5922236110694336 0.3112089128902855 0.4948801061455181  
0.6090622182691826 0.3307705647902413 0.5735569981216666  
0.6930548120932276 0.5362726202275432 0.3593946740653888  
0.7129873900984796 0.5619598582795913 0.4351822621340095  
0.7321638254627791 0.5857401445874225 0.5114384257388058  
0.5964108131716070 0.2827934800491504 0.4578130579774932  
0.6126448277561928 0.3008589303415054 0.5366203230335312  
0.6301093505261910 0.3211358980294287 0.6143683341743474  
0.4828180642365774 0.5828085929349397 0.5908097696040072  
0.3848273792558801 0.4822059681814027 0.6130103957525083  
0.3581046126196183 0.4433250952100246 0.4788735474048287  
0.4190941248244361 0.6039629245808826 0.4176896779233246

0.4475662733926638 0.6477676801620107 0.5503776810964393  
 0.2553651578830687 0.4240403947744684 0.5801944098180304  
 0.3750150399180348 0.7358976859313862 0.4609645146282858  
 0.6125114093037706 0.5189662198272734 0.3981137390106896  
 0.6458359892174887 0.5621026983414255 0.5292807523530039  
 0.5521853381778443 0.3623417939184810 0.4599761456046939  
 0.5818735735654936 0.3959385759618050 0.5947237054899118  
 0.7444114209368810 0.5756365287862654 0.4227382928642471  
 0.6260550582729724 0.2674016806602833 0.5420058169604917  
 0.3302575239549946 0.7209772885966885 0.4109691130799420  
 0.2180959278032624 0.4290813480540637 0.5231337158653110  
 0.4046795750114872 0.6329942782680097 0.3607846829772268  
 0.3159253376301025 0.4029793759770915 0.4485984711405803  
 0.5495777641680357 0.3084284178198412 0.4237638681637608  
 0.7558679919615600 0.5362149470038218 0.3674639533369280  
 0.6469158775325856 0.2507361952058832 0.4785601049603659  
 0.5983967831753675 0.3632745677379960 0.6495283560346481  
 0.6709804792808426 0.2788175147596209 0.5912205899611983  
 0.7832710824012998 0.5703358362241984 0.4776316005699001  
 0.6909812126619528 0.6029542116994920 0.5565596136418327  
 0.3599962410235313 0.4688062751118434 0.6726815721204403  
 0.2404193836221473 0.4604813878099007 0.6346354210839708  
 0.3528152647660884 0.7559034496428384 0.5223458728640817  
 0.4527656341670070 0.7076371732625774 0.5815758851859933  
 0.6338415223154013 0.5302228533964406 0.3379693023111874

**Y\*-Ta**

1.0000000000000000  
 30.0000000000000000 0.0000000000000000 0.0000000000000000  
 0.0000000000000000 30.0000000000000000 0.0000000000000000  
 0.0000000000000000 0.0000000000000000 30.0000000000000000

Ta Y O C Li H

1 1 26 36 1 28

**Direct**

0.4915070011597883 0.4900973313087728 0.4651466872773174  
 0.5160320125051291 0.5181222532632677 0.5686195456109175  
 0.3263188607213895 0.4727665853553372 0.6807041599122042  
 0.2834662951303630 0.4046727396329730 0.4484655027694128  
 0.3802670254618429 0.6492258493868844 0.3549294184547582  
 0.4249975771517152 0.7296141278653536 0.5822640781771818  
 0.2270855203878502 0.4120494296503787 0.4953381920668801  
 0.4781440173979841 0.5790740447805185 0.5366169026241699  
 0.4455022970867003 0.4864277510642657 0.5680109773174864  
 0.3424546012457904 0.7064635579329248 0.3817842393977515  
 0.3724173007808056 0.7628862876322288 0.5422955375146361

0.4357228555902989 0.4705255626427757 0.4952392017636868  
0.4670086977880046 0.5517335026098370 0.4674636927551790  
0.2573568485744391 0.4581265000496128 0.6595401645206737  
0.5757929239039274 0.5377118713967026 0.5234406005874588  
0.5413407478780344 0.4473209637956074 0.5588941776264855  
0.5215202373781003 0.4349672082514409 0.4872773223309013  
0.5521411123604680 0.5151709578445115 0.4558219616911253  
0.7351255078062107 0.5369574714192833 0.3415773985765039  
0.7258715171304481 0.6009682526479826 0.5501322663576510  
0.7788252492280304 0.5897549154458495 0.5001692856041100  
0.5735880448935520 0.2852813394900690 0.4170075202039699  
0.6246680319932522 0.2467224973488813 0.4534788377592976  
0.6606397163780444 0.2847374163938257 0.6181494381475970  
0.6242149203173835 0.3396924667797834 0.6510145312535635  
0.6643620376880982 0.5249827656412225 0.3248927634654324  
0.4932272368011234 0.5510748580530999 0.6285410203669580  
0.5370606426565446 0.5713265988725120 0.6127764250285506  
0.3001043688363595 0.4618406978277146 0.6458845957865723  
0.2715478183295466 0.4170848108244885 0.4900454038822676  
0.3725368350696011 0.6744042793943722 0.3913501534930587  
0.4014436201616177 0.7284956357285537 0.5437848575116307  
0.4616563719268862 0.5834707028670422 0.4974372376807691  
0.4208375495152985 0.4729797887002038 0.5366655896012804  
0.3592419667324899 0.4661148094477076 0.5896997472235797  
0.3457073644169131 0.4442765676350403 0.5124850502202088  
0.4177704942461094 0.6295884520342289 0.4432660799999087  
0.4308112931340896 0.6565371497337433 0.5188018854011841  
0.2854488857611550 0.4381035028476318 0.5681985999924966  
0.3872045873178515 0.7024193260318741 0.4669897884684097  
0.3145996450852570 0.4554125689444441 0.6017301415779810  
0.3006336929401165 0.4329996241526608 0.5232113188042937  
0.3924440459766765 0.6687323186957133 0.4334462711345108  
0.4062955312316656 0.6962041280087826 0.5101293441269160  
0.4369171676553802 0.6237128113817390 0.4856738348299321  
0.3744444966494761 0.4601405048145204 0.5458458357888580  
0.5832596886076722 0.5315241915573361 0.4824495685468275  
0.5414054190219693 0.4224140585950705 0.5246429378667951  
0.6271295691103834 0.5423560665859797 0.4634928369457807  
0.5641368313925684 0.3792247428118338 0.5264576159031108  
0.6379178163707584 0.5341058520837962 0.4186817869437340  
0.6590977386744641 0.5595535233671219 0.4930716190063097  
0.5675229007842332 0.3508602078531858 0.4893482347798515  
0.5849687414574245 0.3681169189900144 0.5669805785675296  
0.6817853890017724 0.5436557196117693 0.4025984717841577  
0.7031224235636017 0.5693572199339819 0.4783476912790412  
0.5921996565428179 0.3101830727740628 0.4926025912469080

0.6097050335100066 0.3279031112124277 0.5715324637186173  
 0.6931640286249783 0.5354368144702495 0.3578489325421293  
 0.7142338378241079 0.5616703681280831 0.4326454899583174  
 0.7347306603000813 0.5862343940560120 0.5086260200384225  
 0.5965053830493153 0.2817965399583561 0.4555253286676776  
 0.6128803686549957 0.2986355314318910 0.5340695138304424  
 0.6306475236266554 0.3178099768797156 0.6123023096846547  
 0.4873526188010432 0.6023967941840667 0.5970369617404155  
 0.3826493877880996 0.4809556709728147 0.6132322815243946  
 0.3581288793032487 0.4428276118197602 0.4783380084076919  
 0.4208547628142939 0.6024651647070203 0.4192204120691741  
 0.4419993968723889 0.6494456254909448 0.5525904746836543  
 0.2539603326432994 0.4226188295776174 0.5781663508702370  
 0.3756989832607944 0.7356406613188942 0.4573988972241682  
 0.6129290559039694 0.5182316106314124 0.3975540228442355  
 0.6491832601101672 0.5628147072276515 0.5278924626015724  
 0.5531218322706054 0.3619979177974402 0.4578754840008267  
 0.5833492592561236 0.3927376769311709 0.5936593044580752  
 0.7449194883505579 0.5760460780342509 0.4191756518439331  
 0.6250251282934532 0.2646450848453200 0.5390636589813602  
 0.3311667620274030 0.7182311864137338 0.4100170982109643  
 0.2181256887281180 0.4294117084050891 0.5214052144451595  
 0.4065638683533809 0.6308613585535572 0.3604192205178695  
 0.3158761969406191 0.4019451085564894 0.4473646046149283  
 0.5488968029932346 0.3060003387473946 0.4214783358674419  
 0.7556971917118902 0.5355028081772498 0.3667926576275543  
 0.6469408397883180 0.2503537416761397 0.4769892393630482  
 0.5984705317937377 0.3593413236471769 0.6476407927899768  
 0.6717114543876380 0.2759141517651756 0.5888149416059411  
 0.7856021918668481 0.5708073567153451 0.4745619682078560  
 0.6935785941833560 0.6032690017156329 0.5537139046076144  
 0.3574823807069141 0.4703727319312351 0.6715793285668197  
 0.2382593001942216 0.4592634988254307 0.6331956630067285  
 0.3496151810324671 0.7556192783593592 0.5201677667598074  
 0.4526349604671688 0.7130548461578818 0.5776476873075856  
 0.6341059516570491 0.5307441861541231 0.3353893316883253

**W\*-Ti**

1.0000000000000000  
 30.0000000000000000 0.0000000000000000 0.0000000000000000  
 0.0000000000000000 30.0000000000000000 0.0000000000000000  
 0.0000000000000000 0.0000000000000000 30.0000000000000000

W Ti O C Li H  
 1 1 26 36 1 28

**Direct**

0.5114941118402349 0.5136286007609218 0.5505332075188367

0.4916344836731970 0.4910533614016286 0.4663222216027130  
0.3321641558913299 0.4732557221641175 0.6803810531198660  
0.2830295401498193 0.4044883585132851 0.4496081005902189  
0.3801723752200050 0.6507846550407294 0.3566667550860119  
0.4260984523853484 0.7289298971577891 0.5845956111282158  
0.2275105213311814 0.4119647021918876 0.4975832602740879  
0.4792053122026522 0.5746631482742829 0.5326771938351011  
0.4496222739009313 0.4864789778908726 0.5600102266777636  
0.3424510866009601 0.7082775549078462 0.3831515914741415  
0.3733605091930438 0.7624368651958109 0.5449032856422116  
0.4340002437490096 0.4682429835508969 0.4891984389457533  
0.4642438700573825 0.5530616194476086 0.4622893808199656  
0.2623469820353662 0.4612439261645455 0.6600330301255660  
0.5695754844578224 0.5322260895167976 0.5201521944174672  
0.5380286581236310 0.4520816602492704 0.5548432275004590  
0.5211436981640928 0.4332663125298184 0.4836642529788091  
0.5514600679221043 0.5136030192460923 0.4500500739218221  
0.7350706959602485 0.5381948892064293 0.3434859599737771  
0.7226834251514065 0.5997937578060499 0.5525720549154052  
0.7757436852526507 0.5895696582255482 0.5024194599252849  
0.5726084468547014 0.2866164662689330 0.4197022489848546  
0.6237396153897063 0.2479275511799431 0.4561544996793921  
0.6597698041805021 0.2882210960186597 0.6201641440983302  
0.6239164630441630 0.3435582460101375 0.6530698880658555  
0.6645166571427632 0.5259637162274943 0.3257155143442682  
0.4958555305894262 0.5358743771679172 0.6139804559980743  
0.5388269216761539 0.5551466977071021 0.5980405044572643  
0.3050941865035082 0.4629818126124883 0.6459363492390859  
0.2718934812880078 0.4170207326178991 0.4914195347842512  
0.3722883176668416 0.6760687913967024 0.3930446487095809  
0.4024595669528617 0.7280101093627724 0.5460387733645332  
0.4610889673316732 0.5819401877735578 0.4936103219687398  
0.4220704782578628 0.4713803269334215 0.5303844586008123  
0.3633032097726485 0.4654685862535312 0.5884574990418612  
0.3465841865477501 0.4435936985344050 0.5118954078308386  
0.4170779998414980 0.6306607243037496 0.4442382811605038  
0.4320619160599454 0.6561059220760811 0.5198677109636846  
0.2881254879502927 0.4386219706271739 0.5692081853777405  
0.3874889058677728 0.7030308411080507 0.4692950170955725  
0.3186903759426256 0.4556148700995908 0.6017047270162890  
0.3017597967752403 0.4329844709230793 0.5238568652505837  
0.3920183038069840 0.6700641360549169 0.4350907992201357  
0.4072604614405184 0.6960832550850159 0.5121105315779259  
0.4369484580210107 0.6239319209910509 0.4860356962460333  
0.3767632491526412 0.4591953932695134 0.5440866298434294  
0.5802197846222399 0.5283167130660361 0.4784716752482461

0.5395973601982149 0.4239798884715177 0.5214706805378539  
0.6250884996306222 0.5407766747397990 0.4637733108162903  
0.5634811219545819 0.3817182643083074 0.5275481395057133  
0.6370017262218103 0.5335694620751883 0.4190544453907761  
0.6561562976705682 0.5577556013161398 0.4944383605228479  
0.5672217985182577 0.3524942722510623 0.4911612799418231  
0.5842255277329533 0.3717628066833751 0.5683568051450645  
0.6808617310245033 0.5438152320410670 0.4037937762192613  
0.7003485792635877 0.5685458498109008 0.4803745146615812  
0.5918530011766706 0.3119940163372410 0.4949552824908030  
0.6090312356714113 0.3314492956689207 0.5735509388753629  
0.6928542270390833 0.5363080577142504 0.3591340272099580  
0.7123703939398874 0.5618537605553966 0.4346956812543922  
0.7316719790285487 0.5853766030292999 0.5108974520024885  
0.5957562095655065 0.2832057765043975 0.4581811519230111  
0.6123385721256589 0.3013702111638081 0.5366630119700355  
0.6300501271405304 0.3215776807190361 0.6142918734102750  
0.4901011521494910 0.5930324105594662 0.5915549887081858  
0.3874956702360598 0.4799500395541915 0.6114415725935878  
0.3580383011311608 0.4421773269726896 0.4774236526623339  
0.4196237507398750 0.6035981482795777 0.4200892060861068  
0.4441393482099155 0.6488413886144612 0.5533757484496610  
0.2567343092188389 0.4236639293589483 0.5802813557549412  
0.3753066495671132 0.7363074317113613 0.4606826881300741  
0.6124982590324758 0.5175447511823620 0.3974768876218463  
0.6460178083476524 0.5600685914461206 0.5292861309662221  
0.5527534324024203 0.3632176378156838 0.4595968758882920  
0.5825666159800679 0.3967158008708624 0.5947743609888040  
0.7430177467635016 0.5769811857905298 0.4220536045207545  
0.6246234719205426 0.2675039167901237 0.5423286726462280  
0.3307144678698508 0.7200587798878239 0.4111615904137406  
0.2187920131193889 0.4299019741181779 0.5233166190366721  
0.4063816953654045 0.6324297529241394 0.3625812277960052  
0.3154015121776491 0.4014384564565956 0.4481595700769429  
0.5482941419279259 0.3077728604458475 0.4242204513309716  
0.7551967402712517 0.5362790744461993 0.3690204644059112  
0.6464589372298003 0.2518380934183255 0.4791546682577043  
0.5979825334217973 0.3629691221831561 0.6500075083458775  
0.6706881578501652 0.2792579222119740 0.5908146919723150  
0.7828883590701354 0.5704983229854650 0.4769965510261915  
0.6904184424259144 0.6024192716733513 0.5557735503043405  
0.3629896326746991 0.4684862512045448 0.6711070118148124  
0.2432008078876413 0.4623213939434694 0.6336924081153888  
0.3502483989754736 0.7552874525978840 0.5230785807547020  
0.4545470204074777 0.7141118107516153 0.5793629041507896  
0.6341198947821800 0.5314722305705251 0.3359680790950783



Sc\*-Cu

1.0000000000000000  
30.0000000000000000 0.0000000000000000 0.0000000000000000  
0.0000000000000000 30.0000000000000000 0.0000000000000000  
0.0000000000000000 0.0000000000000000 30.0000000000000000

Cu Sc O C Li H  
1 1 26 36 1 28

Direct

0.4924182318621293 0.4913891006380229 0.4692843778357380  
0.5145614772088486 0.5160383320612948 0.5616936703826452  
0.3312505493340319 0.4734129422378973 0.6800060873031175  
0.2829958128775918 0.4044853002110750 0.4494390966271414  
0.3798005717880263 0.6504681377271821 0.3562851829814693  
0.4254758343809851 0.7274945756666933 0.5848348774751524  
0.2271960721299428 0.4114300811465682 0.4970396400305814  
0.4779819030894208 0.5755688107507021 0.5344667732051029  
0.4490382438761284 0.4863011123858960 0.5590280922035382  
0.3429077383993677 0.7083710308314879 0.3827803309805436  
0.3740078241272927 0.7626676477547345 0.5451075260354833  
0.4313276080633655 0.4699865647015232 0.4874529841997500  
0.4665160005340052 0.5545836479727655 0.4630622389937116  
0.2619040250611103 0.4593175287080876 0.6601837128792373  
0.5683364044731967 0.5350677736351226 0.5174340490723024  
0.5406249148339932 0.4508537118118683 0.5569974019227617  
0.5208797467302358 0.4319803934437844 0.4864514508890196  
0.5521948896446468 0.5128829382567515 0.4471013359695497  
0.7356320387134114 0.5382709971922723 0.3421669762840326  
0.7215405154878870 0.5995294913552862 0.5519931448080572  
0.7751761230646553 0.5892768517055377 0.5027372364790962  
0.5731009437987193 0.2870377604422360 0.4192598247282663  
0.6238199649595761 0.2476350656432910 0.4552184136312037  
0.6601468725598839 0.2869900706911928 0.6205781282315437  
0.6241283544093902 0.3424829914987488 0.6528134690711949  
0.6651880403584018 0.5256170271896493 0.3250375947340436  
0.4956621085182173 0.5393050841775344 0.6212011866311865  
0.5389023980380454 0.5599885089664549 0.6056817472056348  
0.3043925867793799 0.4627412214110700 0.6456300952159466  
0.2714879106755397 0.4169150401210254 0.4910743660484167  
0.3724231579963683 0.6757881653588501 0.3926882018472679  
0.4024039300782454 0.7276589248376331 0.5459961545187010  
0.4621768213307063 0.5817729262533783 0.4948796692475445  
0.4221766266735431 0.4729830395880851 0.5288640273674250  
0.3625575508392541 0.4667245414447420 0.5875098187572965  
0.3458718251428891 0.4444553378867670 0.5114424880622607  
0.4173933499142738 0.6303695445774669 0.4441686119127976

0.4317082722420317 0.6559731421137347 0.5195334920298437  
0.2877341667203117 0.4389455955218573 0.5687681802533137  
0.3876844509740043 0.7027408024798329 0.4688402740875109  
0.3180302575942757 0.4562603199811708 0.6011445723874710  
0.3011573026967345 0.4333164627328604 0.5235257491612629  
0.3921997395226227 0.6697278242968703 0.4347784573414243  
0.4070321289228161 0.6959943018341959 0.5117800581594901  
0.4369578286090968 0.6240256433263595 0.4860229278435667  
0.3758201192711160 0.4604593915699060 0.5432582903670652  
0.5783299107946901 0.5288355682342204 0.4765828273373888  
0.5400429286130842 0.4243384563331199 0.5233882306274055  
0.6247711045140697 0.5410679037891045 0.4619969995004057  
0.5643603087080529 0.3809099402397556 0.5281043519559595  
0.6373442575202998 0.5335407625222981 0.4177616738035866  
0.6553158388385020 0.5580408805217718 0.4928915917607774  
0.5678138082934283 0.3523123055323814 0.4914436855807761  
0.5849553895462593 0.3705488847841830 0.5685099931628993  
0.6814918485072997 0.5435034826301022 0.4029187463672113  
0.7000083825071850 0.5683524249447272 0.4795666847587656  
0.5923769963087102 0.3116116302736142 0.4947244735042730  
0.6097369062704590 0.3301627977239540 0.5734501986257959  
0.6936308460546681 0.5360435201645345 0.3582090991283362  
0.7124929985276124 0.5613438424248555 0.4342066613827389  
0.7310741106909239 0.5851686621262646 0.5104926786961006  
0.5961603047340288 0.2831054739923707 0.4576125286372570  
0.6128454689190086 0.3006354281849624 0.5362661343388277  
0.6305064306638175 0.3202185370040498 0.6143292432748567  
0.4886026096327726 0.5936517526847352 0.5943247185273433  
0.3869810121960636 0.4812291924664210 0.6103031399151568  
0.3578243727341430 0.4427379866820795 0.4771077357117006  
0.4207191955875784 0.6032958015562112 0.4200512108942213  
0.4445785604214790 0.6486340315415617 0.5527385472233551  
0.2559795378809966 0.4248769669621974 0.5797892999202844  
0.3746639773468286 0.7356627217075864 0.4602933013065009  
0.6125520980966259 0.5181576932327554 0.3959730417979518  
0.6442356625877124 0.5611209741445438 0.5274157135380254  
0.5527617126281208 0.3634932651449302 0.4602161631980862  
0.5828749282442390 0.3954533645551516 0.5949573800226067  
0.7440985344608280 0.5749208914545622 0.4221596374451857  
0.6261487779243732 0.2670746445579207 0.5412591607958382  
0.3310137814010611 0.7201124588064833 0.4107204749764957  
0.2182350013777338 0.4288062216008645 0.5230380670486239  
0.4054198998760554 0.6312509540904994 0.3619866258151149  
0.3155067438796489 0.4034950755094728 0.4477048771215512  
0.5495570460528094 0.3090849812835448 0.4235371860264915  
0.7562679283366412 0.5367061374337297 0.3672715872063176

0.6463450559137462 0.2507467599303002 0.4785084148139281  
0.5988234126536449 0.3626498935674064 0.6491168373383054  
0.6711985212299300 0.2776294521260921 0.5914551946124791  
0.7828518275642052 0.5705813461844708 0.4772679977879924  
0.6891885729282101 0.6014353446925172 0.5552602190386784  
0.3622503248951052 0.4707462618469535 0.6704629110139152  
0.2421124414938597 0.4604531574886390 0.6343829968781269  
0.3513386047906786 0.7566650060521585 0.5225292437786712  
0.4525294786644237 0.7100122940918093 0.5803682163536130  
0.6347771698826956 0.5296163183052985 0.3359456144837540

**Pt\*-Cu**

1.0000000000000000  
30.0000000000000000 0.0000000000000000 0.0000000000000000  
0.0000000000000000 30.0000000000000000 0.0000000000000000  
0.0000000000000000 0.0000000000000000 30.0000000000000000

Pt Cu O C Li H  
1 1 26 36 1 28

**Direct**

0.4962389561664981 0.4980289359643820 0.4826511820111634  
0.4863727301354393 0.5034747591748393 0.6024444280178979  
0.3140368362751275 0.4671910376465137 0.6751078639924994  
0.2798449201113011 0.4007991526501111 0.4417049848697241  
0.3814265594019332 0.6475400570158346 0.3518995805718017  
0.4217185085434351 0.7282106229444389 0.5796735269090521  
0.2216469067703714 0.4076607788658962 0.4860526530529490  
0.4744128251044511 0.5780591340708496 0.5354571168189266  
0.4374857308908577 0.4669512882522137 0.5732682398426573  
0.3430717115736344 0.7051018257365080 0.3766720547235654  
0.3733566039093802 0.7640166766625608 0.5377485288925780  
0.4308663995341334 0.4761480597221419 0.4977808449119578  
0.4691603526327953 0.5540460294025343 0.4637757392003744  
0.2457735674952845 0.4532334656445614 0.6519872643301087  
0.5796049929326450 0.5512239371747870 0.5165057174856121  
0.5639829680146632 0.4581291162402381 0.5493508479444388  
0.5186781573955742 0.4371647618793139 0.4924144841147310  
0.5566201813011454 0.5149534820831577 0.4543090373750273  
0.7343535628186176 0.5338006467381510 0.3312342098096408  
0.7335816719799420 0.6016715603077217 0.5393110164822024  
0.7848503138676988 0.5883853870180039 0.4884325246744922  
0.5681947276684430 0.2894593710565981 0.4153017413743339  
0.6181833601368958 0.2481073971833549 0.4500143575739644  
0.6569199535791067 0.2818588862780727 0.6159349346574245  
0.6252522695640748 0.3398060115541802 0.6481580394458919  
0.6627424439121369 0.5233020734878461 0.3183478025524237  
0.5716309463185013 0.5408542902681930 0.6257079269335150

0.5288955822591834 0.5371742811246324 0.6404793603201603  
0.2888262273772194 0.4570108067101215 0.6395401595831558  
0.2661668467874277 0.4133401590191193 0.4825715186179678  
0.3729638201511778 0.6733322037225852 0.3875660152994558  
0.4004956878294407 0.7283488278035830 0.5403606168944134  
0.4623598112450606 0.5821831911231210 0.4958719146800850  
0.4160223936548467 0.4674401405542071 0.5361040797872334  
0.3500618752679095 0.4611158250965650 0.5854985532166428  
0.3397098620074547 0.4409692835757709 0.5079528886045402  
0.4178816573854207 0.6292330903934353 0.4406564975212511  
0.4303743537365221 0.6562603948058299 0.5156020113537614  
0.2771223478188005 0.4343579977042575 0.5609838977730519  
0.3869862369479930 0.7016799518505810 0.4633968135159694  
0.3047969788474083 0.4511062230498167 0.5956837957625516  
0.2940457518760885 0.4296082800346945 0.5167727868018602  
0.3923470185635142 0.6681376446074921 0.4301801874177817  
0.4057020248305083 0.6958099582016142 0.5066185974917806  
0.4366556893320050 0.6238345201232656 0.4828579950890246  
0.3673106339919879 0.4555792496028599 0.5425445344054851  
0.5851003006578791 0.5366995992934975 0.4774862466485537  
0.5486538066961618 0.4301497321094974 0.5221007020959700  
0.6305434930092162 0.5452069317173791 0.4567291762062682  
0.5676475691681032 0.3836067820355348 0.5247846627676505  
0.6402084854026963 0.5346991027220568 0.4124459498830502  
0.6637244618203562 0.5622792581070298 0.4845956703879994  
0.5672455404068406 0.3547269558249835 0.4883336283533253  
0.5888524810115453 0.3714381141512853 0.5643996050872397  
0.6838376245889088 0.5425916390662728 0.3947233198966870  
0.7079070863976279 0.5696323380761960 0.4687887378946327  
0.5895531595741026 0.3125874288298796 0.4906914718247221  
0.6098158338936147 0.3290874774735720 0.5689330157466366  
0.6932860192402173 0.5334926015099080 0.3495240945254341  
0.7174213410356778 0.5603374228268915 0.4232664174039463  
0.7409617250136917 0.5861332154143838 0.4979926357210245  
0.5916881730104476 0.2843363350277058 0.4531919207278061  
0.6100466690709380 0.2997433099574990 0.5316428924848082  
0.6299235522359387 0.3172486028666556 0.6097962685704827  
0.5673427433474364 0.5183802922185408 0.5665730047140859  
0.3729240780553529 0.4744199412344388 0.6104332965554257  
0.3536033495147459 0.4397749236466230 0.4742969580986933  
0.4221094337818616 0.6018458186009890 0.4170013836549613  
0.4442714579203006 0.6483865562490151 0.5483780085517881  
0.2445526402301960 0.4202143381546498 0.5693258227045156  
0.3729249418842556 0.7340285812317822 0.4540404991502587  
0.6138355790398892 0.5189808304713416 0.3928436167622599  
0.6540970885821865 0.5682895846454901 0.5191882412627409

|                    |                    |                    |
|--------------------|--------------------|--------------------|
| 0.5515464226458346 | 0.3665946289562552 | 0.4576922179933718 |
| 0.5903722146195294 | 0.3968372299097102 | 0.5904636456827270 |
| 0.7489834651476022 | 0.5717391210976317 | 0.4089565860439990 |
| 0.6212445250436280 | 0.2652936211222826 | 0.5358735327762194 |
| 0.3308772369623103 | 0.7175741175438313 | 0.4041494225214724 |
| 0.2109131204169075 | 0.4247183722026989 | 0.5115993381666585 |
| 0.4064469530289660 | 0.6279375443376006 | 0.3589399409109921 |
| 0.3123624437085269 | 0.3995605955202005 | 0.4417071351993455 |
| 0.5453502157463987 | 0.3121253028033122 | 0.4201511814710128 |
| 0.7563628679341836 | 0.5332506813720792 | 0.3552084449468110 |
| 0.6413526913653734 | 0.2504669069676947 | 0.4727899220491904 |
| 0.6020692848912842 | 0.3623950561761232 | 0.6443140857098627 |
| 0.6665810267140562 | 0.2710772653305362 | 0.5868066679138524 |
| 0.7909559339066472 | 0.5687815811011059 | 0.4631902463262851 |
| 0.7014822132132883 | 0.6040271925488064 | 0.5443052588505755 |
| 0.3454823894738500 | 0.4655263478272886 | 0.6667233831745758 |
| 0.2271672116868537 | 0.4542995763773644 | 0.6253649522852341 |
| 0.3528281110163620 | 0.7596190029820403 | 0.5129049596878147 |
| 0.4439024912223025 | 0.7043281361150178 | 0.5796077502842168 |
| 0.6330972321218257 | 0.5284312404520889 | 0.3308129864197155 |

**Pd\*-Ru**

1.0000000000000000

30.0000000000000000 0.0000000000000000 0.0000000000000000

0.0000000000000000 30.0000000000000000 0.0000000000000000

0.0000000000000000 0.0000000000000000 30.0000000000000000

Pd Ru O C H

1 1 24 36 28

**Direct**

|                    |                    |                    |
|--------------------|--------------------|--------------------|
| 0.5085602063607954 | 0.5155980240887078 | 0.5477846508758394 |
| 0.4911026646049731 | 0.4922500752710893 | 0.4690823245015704 |
| 0.3201299131306716 | 0.4700121876189390 | 0.6751389884549888 |
| 0.2875940811429335 | 0.3988724442527948 | 0.4425688420300244 |
| 0.3846956327116591 | 0.6501233831606392 | 0.3513947057677310 |
| 0.4250239332865140 | 0.7285486966498025 | 0.5803017215830604 |
| 0.2293632517755539 | 0.4037603924949787 | 0.4873099616225868 |
| 0.4782691305691318 | 0.5754023492732854 | 0.5310540993533952 |
| 0.4440282804642686 | 0.4891504973161758 | 0.5617246207494216 |
| 0.3488237110739776 | 0.7095605499296431 | 0.3758801585886044 |
| 0.3769831899782153 | 0.7646341221477440 | 0.5378446888364046 |
| 0.4308766328999281 | 0.4692164628557430 | 0.4893065865717081 |
| 0.4632198460999064 | 0.5530602241802020 | 0.4596498854550050 |
| 0.2523246871175739 | 0.4541407473606318 | 0.6514242590322732 |
| 0.5705280834531732 | 0.5379256569622746 | 0.5215238483224176 |
| 0.5364406429103576 | 0.4523317854412126 | 0.5539677918945852 |
| 0.5203276567123473 | 0.4327080979726032 | 0.4819933112752107 |

0.5517364809193045 0.5156350088762139 0.4510245469515354  
0.7259828591382833 0.5360384060857118 0.3350217383376005  
0.7267720416611957 0.6056492404284235 0.5427596031699088  
0.7769013090844343 0.5934078458454050 0.4902189417907700  
0.5655318248912863 0.2866209891683575 0.4183902126375810  
0.6157689769744441 0.2459193311895846 0.4536062096208860  
0.6583376677693255 0.2874168507547871 0.6168439438667471  
0.6259965018377267 0.3453220447100687 0.6487423624400425  
0.6545754971984358 0.5219440068061464 0.3239288400605722  
0.2954996842826886 0.4585879203229218 0.6393539331091731  
0.2736948033088284 0.4109371362862519 0.4835835736638165  
0.3770499255256661 0.6762936786061333 0.3871323706419055  
0.4039470663213341 0.7286592330570792 0.5406348351770074  
0.4619075424132946 0.5808769107682069 0.4926016852385244  
0.4199562862638512 0.4737459947849881 0.5308511940491888  
0.3568414496285477 0.4646567399142003 0.5849286272594041  
0.3458527330899447 0.4415674410503651 0.5080897890194495  
0.4192412387973543 0.6300807588579335 0.4401776117542939  
0.4328619032323538 0.6558306345060899 0.5157685325802788  
0.2845886171320634 0.4336395508523180 0.5618424018264406  
0.3909765402075586 0.7032112728369904 0.4636086405325078  
0.3120513975419487 0.4523562656691035 0.5958363838431787  
0.3009768119156084 0.4284964098947673 0.5175028278349774  
0.3954433316154710 0.6700297700523665 0.4298522599958409  
0.4090976093804068 0.6962660315593362 0.5070235597572843  
0.4378154861122709 0.6236478539196533 0.4824192346606168  
0.3731423404434959 0.4589835810220803 0.5416208379628563  
0.5787422099125185 0.5316453906287724 0.4807362631120682  
0.5379004141181359 0.4262272362794027 0.5208255209191067  
0.6242065325815485 0.5429255872454665 0.4626081297121265  
0.5625475550705086 0.3827670109854625 0.5252477379159564  
0.6337940058007741 0.5333772558516588 0.4180259029220181  
0.6568234423108272 0.5610194733228311 0.4905970625653530  
0.5649397231719345 0.3536054732463766 0.4889363560192742  
0.5842651039286114 0.3727654769191069 0.5652102851320044  
0.6766596927313475 0.5428619463485583 0.3996228736942936  
0.7003579602496138 0.5708177738583652 0.4736429252985275  
0.5884929356664638 0.3123139621206702 0.4924015905976348  
0.6085780318142876 0.3320394620475930 0.5700803115451795  
0.6853750654172095 0.5338639828508071 0.3544020574075599  
0.7097568932921831 0.5620406224293031 0.4278229818522543  
0.7334167229054339 0.5892740755179705 0.5014190880764290  
0.5898615862271698 0.2827214811484354 0.4559903079755966  
0.6099028098425486 0.3016264016118200 0.5335053261838906  
0.6302114850510874 0.3220460228580195 0.6105327047515248  
0.3790831504822176 0.4804063426098983 0.6090787866337931

|                    |                    |                    |
|--------------------|--------------------|--------------------|
| 0.3596026431401814 | 0.4402187466132326 | 0.4744484044714530 |
| 0.4222389140489325 | 0.6027226589611047 | 0.4164076867251215 |
| 0.4462080778735452 | 0.6478791184002045 | 0.5486991874413161 |
| 0.2528082352879695 | 0.4182434865453023 | 0.5710381620296617 |
| 0.3785077460867004 | 0.7363014103391233 | 0.4546045441263790 |
| 0.6077950089022079 | 0.5169233796519563 | 0.3987314049078530 |
| 0.6482844656975592 | 0.5653565362687395 | 0.5257074147246715 |
| 0.5497571219184231 | 0.3644948866719209 | 0.4577880683307451 |
| 0.5830662433140893 | 0.3980204784979481 | 0.5913920879100706 |
| 0.7403218904074892 | 0.5754510426932213 | 0.4130690744913664 |
| 0.6224160268409582 | 0.2677395663824372 | 0.5388324853891305 |
| 0.3364080302734138 | 0.7220484353776901 | 0.4032516416006439 |
| 0.2183616485940718 | 0.4208115106210294 | 0.5127544620509531 |
| 0.4092590215653249 | 0.6299470246075943 | 0.3583873764056199 |
| 0.3201376676144824 | 0.3987279510973105 | 0.4423137478178612 |
| 0.5427921242003330 | 0.3094183688377137 | 0.4231664842531782 |
| 0.7484425654475820 | 0.5356353288549474 | 0.3585636812728790 |
| 0.6393329972694977 | 0.2486627187690743 | 0.4758720544649571 |
| 0.6017844735146579 | 0.3667777045012238 | 0.6451081730966935 |
| 0.6678522965365862 | 0.2765747684940211 | 0.5876789765863083 |
| 0.7830320541658662 | 0.5731253742566936 | 0.4655083825649040 |
| 0.6947214147479491 | 0.6083602612199086 | 0.5477586971306384 |
| 0.3515984734498820 | 0.4677705674186736 | 0.6671029916675342 |
| 0.2339647537985074 | 0.4550662883247512 | 0.6245737349248645 |
| 0.3555776112422736 | 0.7596029522325340 | 0.5138571932635726 |
| 0.4482833711515887 | 0.7057896744315564 | 0.5795401918309879 |
| 0.6250521932897295 | 0.5261700824475806 | 0.3369841207088452 |

### Cu\*-Au

1.0000000000000000

|                     |                     |                     |
|---------------------|---------------------|---------------------|
| 30.0000000000000000 | 0.0000000000000000  | 0.0000000000000000  |
| 0.0000000000000000  | 30.0000000000000000 | 0.0000000000000000  |
| 0.0000000000000000  | 0.0000000000000000  | 30.0000000000000000 |

Au Cu O C Li H

1 1 26 36 1 28

### Direct

|                    |                    |                    |
|--------------------|--------------------|--------------------|
| 0.4863727301354393 | 0.5034747591748393 | 0.6024444280178979 |
| 0.4962389561664981 | 0.4980289359643820 | 0.4826511820111634 |
| 0.3140368362751275 | 0.4671910376465137 | 0.6751078639924994 |
| 0.2798449201113011 | 0.4007991526501111 | 0.4417049848697241 |
| 0.3814265594019332 | 0.6475400570158346 | 0.3518995805718017 |
| 0.4217185085434351 | 0.7282106229444389 | 0.5796735269090521 |
| 0.2216469067703714 | 0.4076607788658962 | 0.4860526530529490 |
| 0.4744128251044511 | 0.5780591340708496 | 0.5354571168189266 |
| 0.4374857308908577 | 0.4669512882522137 | 0.5732682398426573 |

0.3430717115736344 0.7051018257365080 0.3766720547235654  
0.3733566039093802 0.7640166766625608 0.5377485288925780  
0.4308663995341334 0.4761480597221419 0.4977808449119578  
0.4691603526327953 0.5540460294025343 0.4637757392003744  
0.2457735674952845 0.4532334656445614 0.6519872643301087  
0.5796049929326450 0.5512239371747870 0.5165057174856121  
0.5639829680146632 0.4581291162402381 0.5493508479444388  
0.5186781573955742 0.4371647618793139 0.4924144841147310  
0.5566201813011454 0.5149534820831577 0.4543090373750273  
0.7343535628186176 0.5338006467381510 0.3312342098096408  
0.7335816719799420 0.6016715603077217 0.5393110164822024  
0.7848503138676988 0.5883853870180039 0.4884325246744922  
0.5681947276684430 0.2894593710565981 0.4153017413743339  
0.6181833601368958 0.2481073971833549 0.4500143575739644  
0.6569199535791067 0.2818588862780727 0.6159349346574245  
0.6252522695640748 0.3398060115541802 0.6481580394458919  
0.6627424439121369 0.5233020734878461 0.3183478025524237  
0.5716309463185013 0.5408542902681930 0.6257079269335150  
0.5288955822591834 0.5371742811246324 0.6404793603201603  
0.2888262273772194 0.4570108067101215 0.6395401595831558  
0.2661668467874277 0.4133401590191193 0.4825715186179678  
0.3729638201511778 0.6733322037225852 0.3875660152994558  
0.4004956878294407 0.7283488278035830 0.5403606168944134  
0.4623598112450606 0.5821831911231210 0.4958719146800850  
0.4160223936548467 0.4674401405542071 0.5361040797872334  
0.3500618752679095 0.4611158250965650 0.5854985532166428  
0.3397098620074547 0.4409692835757709 0.5079528886045402  
0.4178816573854207 0.6292330903934353 0.4406564975212511  
0.4303743537365221 0.6562603948058299 0.5156020113537614  
0.2771223478188005 0.4343579977042575 0.5609838977730519  
0.3869862369479930 0.7016799518505810 0.4633968135159694  
0.3047969788474083 0.4511062230498167 0.5956837957625516  
0.2940457518760885 0.4296082800346945 0.5167727868018602  
0.3923470185635142 0.6681376446074921 0.4301801874177817  
0.4057020248305083 0.6958099582016142 0.5066185974917806  
0.4366556893320050 0.6238345201232656 0.4828579950890246  
0.3673106339919879 0.4555792496028599 0.5425445344054851  
0.5851003006578791 0.5366995992934975 0.4774862466485537  
0.5486538066961618 0.4301497321094974 0.5221007020959700  
0.6305434930092162 0.5452069317173791 0.4567291762062682  
0.5676475691681032 0.3836067820355348 0.5247846627676505  
0.6402084854026963 0.5346991027220568 0.4124459498830502  
0.6637244618203562 0.5622792581070298 0.4845956703879994  
0.5672455404068406 0.3547269558249835 0.4883336283533253  
0.5888524810115453 0.3714381141512853 0.5643996050872397  
0.6838376245889088 0.5425916390662728 0.3947233198966870



|                    |                    |                    |
|--------------------|--------------------|--------------------|
| 0.7079070863976279 | 0.5696323380761960 | 0.4687887378946327 |
| 0.5895531595741026 | 0.3125874288298796 | 0.4906914718247221 |
| 0.6098158338936147 | 0.3290874774735720 | 0.5689330157466366 |
| 0.6932860192402173 | 0.5334926015099080 | 0.3495240945254341 |
| 0.7174213410356778 | 0.5603374228268915 | 0.4232664174039463 |
| 0.7409617250136917 | 0.5861332154143838 | 0.4979926357210245 |
| 0.5916881730104476 | 0.2843363350277058 | 0.4531919207278061 |
| 0.6100466690709380 | 0.2997433099574990 | 0.5316428924848082 |
| 0.6299235522359387 | 0.3172486028666556 | 0.6097962685704827 |
| 0.5673427433474364 | 0.5183802922185408 | 0.5665730047140859 |
| 0.3729240780553529 | 0.4744199412344388 | 0.6104332965554257 |
| 0.3536033495147459 | 0.4397749236466230 | 0.4742969580986933 |
| 0.4221094337818616 | 0.6018458186009890 | 0.4170013836549613 |
| 0.4442714579203006 | 0.6483865562490151 | 0.5483780085517881 |
| 0.2445526402301960 | 0.4202143381546498 | 0.5693258227045156 |
| 0.3729249418842556 | 0.7340285812317822 | 0.4540404991502587 |
| 0.6138355790398892 | 0.5189808304713416 | 0.3928436167622599 |
| 0.6540970885821865 | 0.5682895846454901 | 0.5191882412627409 |
| 0.5515464226458346 | 0.3665946289562552 | 0.4576922179933718 |
| 0.5903722146195294 | 0.3968372299097102 | 0.5904636456827270 |
| 0.7489834651476022 | 0.5717391210976317 | 0.4089565860439990 |
| 0.6212445250436280 | 0.2652936211222826 | 0.5358735327762194 |
| 0.3308772369623103 | 0.7175741175438313 | 0.4041494225214724 |
| 0.2109131204169075 | 0.4247183722026989 | 0.5115993381666585 |
| 0.4064469530289660 | 0.6279375443376006 | 0.3589399409109921 |
| 0.3123624437085269 | 0.3995605955202005 | 0.4417071351993455 |
| 0.5453502157463987 | 0.3121253028033122 | 0.4201511814710128 |
| 0.7563628679341836 | 0.5332506813720792 | 0.3552084449468110 |
| 0.6413526913653734 | 0.2504669069676947 | 0.4727899220491904 |
| 0.6020692848912842 | 0.3623950561761232 | 0.6443140857098627 |
| 0.6665810267140562 | 0.2710772653305362 | 0.5868066679138524 |
| 0.7909559339066472 | 0.5687815811011059 | 0.4631902463262851 |
| 0.7014822132132883 | 0.6040271925488064 | 0.5443052588505755 |
| 0.3454823894738500 | 0.4655263478272886 | 0.6667233831745758 |
| 0.2271672116868537 | 0.4542995763773644 | 0.6253649522852341 |
| 0.3528281110163620 | 0.7596190029820403 | 0.5129049596878147 |
| 0.4439024912223025 | 0.7043281361150178 | 0.5796077502842168 |
| 0.6330972321218257 | 0.5284312404520889 | 0.3308129864197155 |

**Pt\*-Ni**

1.0000000000000000

|                     |                     |                     |
|---------------------|---------------------|---------------------|
| 30.0000000000000000 | 0.0000000000000000  | 0.0000000000000000  |
| 0.0000000000000000  | 30.0000000000000000 | 0.0000000000000000  |
| 0.0000000000000000  | 0.0000000000000000  | 30.0000000000000000 |

Pt Ni O C H

1 1 24 36 28

Direct

0.5078192876034988 0.5145333517190082 0.5447111288763596  
0.4909692136693797 0.4919960960691909 0.4683656352276340  
0.3209371120986678 0.4703224684136077 0.6754911752199083  
0.2885861513284921 0.3991122890189190 0.4426066311959823  
0.3850828582431219 0.6499427992819262 0.3514648577542798  
0.4252728802536893 0.7278113080243653 0.5808511575907357  
0.2304254883153994 0.4041584443823371 0.4875900855240767  
0.4785642659811539 0.5739971351651048 0.5300817443564348  
0.4451961204107560 0.4900815373941035 0.5607645606736493  
0.3489909425590964 0.7092322085880070 0.3762428832410682  
0.3775454923835190 0.7637524538986264 0.5378197911779784  
0.4311393048576346 0.4690627420329975 0.4887374332888166  
0.4630056768564016 0.5524445600040142 0.4584542707718927  
0.2533670130889790 0.4543601387701359 0.6509660805708682  
0.5688278727266679 0.5364029311628318 0.5207207693661783  
0.5359073489924995 0.4531156610037462 0.5527120865107619  
0.5199240768135275 0.4324884810000434 0.4809352728356594  
0.5510761297856289 0.5152934160462892 0.4495504289337235  
0.7258234123866958 0.5357656741187313 0.3357389296327898  
0.7256207115706077 0.6051259339717604 0.5437218570887793  
0.7755374443611615 0.5930380409397634 0.4909048986271489  
0.5654366565824984 0.2870275017663953 0.4184909756575080  
0.6158821308883522 0.2466515537916766 0.4539227408728119  
0.6579448193701990 0.2881716058095986 0.6166286453870727  
0.6259578176045785 0.3459954102299240 0.6490681237327335  
0.6544434149754892 0.5218371512606056 0.3240830866385115  
0.2966713265874211 0.4589885411094756 0.6393694085973796  
0.2747602999283696 0.4112610881634904 0.4836488172795293  
0.3773057990191592 0.6759798416157514 0.3872914882306990  
0.4044505610604198 0.7277189410501862 0.5409766285687759  
0.4618844192124769 0.5803037943218734 0.4918332339592104  
0.4204372098050337 0.4741201008553306 0.5305716300515207  
0.3580453191899097 0.4651715088833746 0.5849634658007145  
0.3468409682991071 0.4418968407014544 0.5079833722868503  
0.4194584097262939 0.6296303687251713 0.4399243987863413  
0.4332968689866153 0.6548580671308545 0.5158308989488479  
0.2857322083745201 0.4341477372265710 0.5618909624785945  
0.3913519466739457 0.7026143268012226 0.4639467518723187  
0.3132954998544928 0.4528842274232560 0.5959269174670564  
0.3020322350643062 0.4288863657227073 0.5174974512440528  
0.3956965577923051 0.6696193036362953 0.4299506332547173  
0.4095835679047444 0.6953760385121018 0.5073739270375021  
0.4381167576334531 0.6229438067428658 0.4821374595102380  
0.3741230074033812 0.4593927219410791 0.5415883912907392

0.5779614605399818 0.5310152670326521 0.4799382790978997  
0.5376432493143478 0.4263195950233901 0.5201712815812577  
0.6231599848090625 0.5426156252813421 0.4624793209508316  
0.5620461262961848 0.3832320130630826 0.5250787923771665  
0.6329987785986417 0.5333037885020189 0.4178470964824606  
0.6554207252402660 0.5607919523211267 0.4908885848664539  
0.5643270708712258 0.3538800428387479 0.4888990222322968  
0.5836232270428646 0.3735668514980255 0.5652883683725686  
0.6759590047685458 0.5428812386601678 0.3998679143290321  
0.6990448981627140 0.5708206848814431 0.4742792445883232  
0.5879478639830530 0.3127292032486638 0.4925968339205856  
0.6079161607099132 0.3328454783905889 0.5703942956936219  
0.6850468971252859 0.5337467075560026 0.3547938065365756  
0.7087186816660624 0.5621472817398770 0.4284336126539658  
0.7320517649608310 0.5890324321573276 0.5021962795881737  
0.5896415791535679 0.2832183733123080 0.4562079514610942  
0.6092584489049818 0.3023191090314982 0.5338501390406371  
0.6297664368003810 0.3228538630626321 0.6106868427419946  
0.3802480325185628 0.4810853410604753 0.6089875591526958  
0.3604003475564427 0.4405249113202568 0.4742922912599463  
0.4221228662995497 0.6024533789758746 0.4159436203268839  
0.4465459747467647 0.6466851667206588 0.5487125895500310  
0.2542395128332613 0.4182953208498040 0.5712001868244874  
0.3793836574281579 0.7358629359992158 0.4549611834060616  
0.6072445296565070 0.5169331721653740 0.3981010324267860  
0.6466792010985329 0.5650414377543849 0.5259512998283827  
0.5489796407448105 0.3644369989112397 0.4576761994292463  
0.5824419060565658 0.3988670928268718 0.5914044299773447  
0.7392403042665336 0.5757327781820762 0.4138490062295167  
0.6217687231467013 0.2685150977050639 0.5393364218799330  
0.3368105491121409 0.7216228352313377 0.4037719725242601  
0.2197051400491967 0.4214683796804046 0.5129942032931868  
0.4097764280853290 0.6298955778782092 0.3584388949899974  
0.3211396576102975 0.3986468129966533 0.4423688686301046  
0.5425315032698744 0.3096853056108710 0.4232317146047209  
0.7481504600825089 0.5355454628681247 0.3594093855013253  
0.6392845484953030 0.2495159431536768 0.4763489736484456  
0.6013033212245841 0.3670219311213692 0.6461223295847361  
0.6673343394034605 0.2775366024600289 0.5873349008949540  
0.7813955462855917 0.5730055760637106 0.4659207030544560  
0.6936624795823257 0.6086094737872011 0.5486916659428279  
0.3525115203151382 0.4675883306854541 0.6681206992916829  
0.2354483402466943 0.4554841142429071 0.6238054894075040  
0.3561296390737326 0.7584015937344138 0.5139003173229980  
0.4491731737593801 0.7057503025123437 0.5801839367894056  
0.6248115538138156 0.5262560086742949 0.3368531554947069

**Mo\*-Nb**

1.0000000000000000  
30.0000000000000000 0.0000000000000000 0.0000000000000000  
0.0000000000000000 30.0000000000000000 0.0000000000000000  
0.0000000000000000 0.0000000000000000 30.0000000000000000

Mo Nb O C Li H  
1 1 26 36 1 28

**Direct**

0.5057084115766677 0.5136698797628760 0.5445952036308325  
0.4875790507043300 0.4877841928491357 0.4556976041504592  
0.3237193722649203 0.4689419756877172 0.6769462491616125  
0.2837429123472194 0.3990139295658318 0.4450414262466307  
0.3786154438943925 0.6609899625764698 0.3511717403974494  
0.4265681509387655 0.7200238145648713 0.5846925730910976  
0.2266218456827112 0.4068135241705924 0.4910559145701355  
0.4754372486360354 0.5706962377511194 0.5227588922303973  
0.4446206224776117 0.4887420031946264 0.5597654251592112  
0.3433193655367734 0.7177246099404589 0.3823532308333056  
0.3774728979297839 0.7593491386176019 0.5463656903656474  
0.4317499780693133 0.4696645046032196 0.4886958132835825  
0.4596092197666100 0.5523797875733503 0.4511078613821892  
0.2549308895341285 0.4558542897825737 0.6540689776035359  
0.5674903443194914 0.5331310104226580 0.5156079407655414  
0.5342411290362420 0.4503879317599601 0.5456570463350545  
0.5190518820826766 0.4276783246566745 0.4750282318760124  
0.5489942056165391 0.5137390651263064 0.4459105747166072  
0.7350906220337479 0.5351366508518337 0.3404654390049802  
0.7186670842167515 0.6052908556259090 0.5470437236169116  
0.7730184865600090 0.5907148287075398 0.4994019298696240  
0.5723065781567661 0.2785193178764745 0.4198689471157986  
0.6237557920961841 0.2425801201453835 0.4585319006794191  
0.6587132885291715 0.2931589378963863 0.6202666834141460  
0.6217864125522008 0.3497292427877008 0.6496362219663101  
0.6646057953315205 0.5234019010332578 0.3222852234724618  
0.5795570998472505 0.5335246946840921 0.6179214677870745  
0.5370512146589727 0.5288401826967497 0.5969487136055497  
0.2980414707723540 0.4588718749181296 0.6414372380988518  
0.2710714391121481 0.4122172830425361 0.4861742781431220  
0.3720342959101433 0.6837473449192132 0.3894629110853400  
0.4044397565353520 0.7232788336994348 0.5456933227303604  
0.4577419842760050 0.5800892807494936 0.4840003463084782  
0.4176072060933507 0.4724806337227574 0.5297436082346956  
0.3577792509027239 0.4641518016365830 0.5856370683005614  
0.3441950758720688 0.4414787652775012 0.5084755388748795  
0.4153856988723564 0.6330354786266028 0.4369670642577403

0.4316720783714042 0.6526592650107989 0.5142964356753998  
0.2842441264640106 0.4345702846692344 0.5641557504925724  
0.3887486131573357 0.7044605741554467 0.4672478577903044  
0.3132524941556329 0.4525437719924483 0.5975117434621124  
0.2995545981574178 0.4292434602945371 0.5193046701062577  
0.3918125903469201 0.6738724999079897 0.4307954880552363  
0.4082762271242884 0.6937905519321285 0.5094484500513421  
0.4351457482147288 0.6229886629555640 0.4782538634577645  
0.3728592834693394 0.4584584577480633 0.5415679257554042  
0.5784370842628695 0.5293773675987492 0.4734408493194893  
0.5370541701144363 0.4210415753953202 0.5135529263213667  
0.6228864731176714 0.5415969987330913 0.4587719715042064  
0.5619488426886637 0.3797565247118385 0.5217106763513233  
0.6361039874149421 0.5321478537996284 0.4147755922385136  
0.6531671205360224 0.5609919574300197 0.4891719755153510  
0.5664896320565220 0.3486866143345576 0.4869505485975379  
0.5822983360061865 0.3722993996922712 0.5632434266721030  
0.6802898891266680 0.5420045532910285 0.4002024915883696  
0.6979765671364928 0.5702399633326235 0.4759885729090542  
0.5914882543453857 0.3087372414340704 0.4933085642631383  
0.6078292879110074 0.3328504127761424 0.5708204363058154  
0.6927921798157120 0.5336940569278532 0.3558252300900877  
0.7113972139442769 0.5607113525445774 0.4311940191945483  
0.7285575717119674 0.5885096767931112 0.5064459473805124  
0.5955997074524586 0.2777405656881483 0.4583851538502894  
0.6119766661957573 0.3008663012432992 0.5356431934872654  
0.6285038686701465 0.3256133240333555 0.6122696168737710  
0.6011598266740501 0.5131194638508128 0.5663962239447046  
0.3803321129369308 0.4800118029047753 0.6093304265490220  
0.3563099025082426 0.4405946037138131 0.4742125318457291  
0.4167307428544850 0.6076438067235940 0.4109798514788160  
0.4453946678871847 0.6421300459669066 0.5462740115163657  
0.2533092948215472 0.4182321077141345 0.5744080978253204  
0.3776674744782550 0.7386016377332867 0.4608727850219289  
0.6125133657044527 0.5147536710398672 0.3932773047465936  
0.6415835580872550 0.5693453815182319 0.5226454395154960  
0.5521751397029021 0.3573584013644470 0.4546808374233850  
0.5791408837767514 0.3981597701095557 0.5886162671536587  
0.7423617777719993 0.5752515482514712 0.4186435368546417  
0.6246210139402376 0.2675527879714628 0.5433137446769634  
0.3317248430436107 0.7272585985969006 0.4112576521216346  
0.2171000635056039 0.4250389056204829 0.5163292030317066  
0.4042702659142088 0.6413883638113270 0.3552270920946354  
0.3161430828491574 0.3959912510978459 0.4448543701348768  
0.5475248715254690 0.2993273185988299 0.4232988991559823  
0.7551215058492519 0.5332434895065742 0.3660848034691133

0.6462839140223569 0.2478465804239388 0.4814464041946661  
0.5953254996296398 0.3682312772385662 0.6455991513335253  
0.6699192888861029 0.2826475868067703 0.5915436960577989  
0.7803482504116420 0.5697615803102759 0.4755389883607881  
0.6868963182041374 0.6121530374206445 0.5482891159273827  
0.3549060538739783 0.4644569749066794 0.6688107295031621  
0.2365366954350346 0.4579240433791993 0.6272543445186255  
0.3555052888012926 0.7558561374956815 0.5225737939137679  
0.4503674021777540 0.6980770809426212 0.5813892945148813  
0.6342890349815585 0.5301541765851392 0.3320190585400785

**Fe\*-Os**

1.0000000000000000

30.0000000000000000 0.0000000000000000 0.0000000000000000  
0.0000000000000000 30.0000000000000000 0.0000000000000000  
0.0000000000000000 0.0000000000000000 30.0000000000000000

Os Fe O C Li H

1 1 26 36 1 28

**Direct**

0.4931650377120320 0.4912431742491687 0.4717131506682656  
0.5096089753785832 0.5118799449917228 0.5419264943568686  
0.3290058344719388 0.4731956390634451 0.6815496073259797  
0.2834582779682976 0.4047788025905377 0.4500518494925257  
0.3787595505678431 0.6519430056629525 0.3554898462148913  
0.4256661762450678 0.7251954933135706 0.5853171107646975  
0.2273936411133715 0.4115678901772306 0.4973203506041249  
0.4788867896233660 0.5736912710485333 0.5297375112202799  
0.4474991714444712 0.4897194994217396 0.5617756276653303  
0.3420477447576842 0.7095691745024592 0.3828547079792270  
0.3749802232706902 0.7610765949753002 0.5456311132732471  
0.4321572080873373 0.4695620170301425 0.4906354143244093  
0.4648586074636659 0.5534238785350674 0.4587094986300249  
0.2598129168898634 0.4587953006480726 0.6607341812105320  
0.5700461602352065 0.5345511572752008 0.5198823696310279  
0.5384190227239734 0.4512112317284101 0.5534500166697757  
0.5201396694906842 0.4302663643881194 0.4832446567810861  
0.5527063648569109 0.5136716759100982 0.4494878582302226  
0.7348476546792807 0.5381569533645241 0.3426928979310001  
0.7232253651104689 0.6001732978157499 0.5529875739876945  
0.7763282840139295 0.5891813222453270 0.5032486667986518  
0.5734102963787300 0.2866872844405375 0.4193590099066998  
0.6242850346462929 0.2475032542814921 0.4553979267590494  
0.6599583587492938 0.2879720973751747 0.6204579097180114  
0.6239249081054381 0.3433682456122571 0.6529027361643106  
0.6640367310561059 0.5257048221961854 0.3266781202932063

0.5236593401446215 0.5307663722257495 0.6051197903015019  
0.5360846994549169 0.5747525958376974 0.6157509833689880  
0.3024874586069578 0.4625454726711735 0.6467587828323189  
0.2717434964891760 0.4172276454078293 0.4916708704270532  
0.3716025197007377 0.6769401373876583 0.3921780439317525  
0.4032663739435137 0.7260275647999183 0.5461858388650949  
0.4615166531389020 0.5811281829673155 0.4902994931124431  
0.4208932329454884 0.4740708854978262 0.5315016917469956  
0.3611585302614481 0.4674802681185791 0.5896204897824965  
0.3457782701917171 0.4450303880552841 0.5130407646255958  
0.4167146881006522 0.6307040728224635 0.4422462909414622  
0.4328559868074071 0.6550049271732329 0.5179526368039861  
0.2868653185011802 0.4389869560409054 0.5695854004562347  
0.3878266723734871 0.7027086347912387 0.4687886800788749  
0.3166225299153848 0.4564136062118344 0.6024785125805175  
0.3010004503659686 0.4335988030656068 0.5244365849651067  
0.3917371575401978 0.6703396383840275 0.4339797345346759  
0.4079024439184580 0.6950346658841049 0.5113575444073755  
0.4371048623035613 0.6235395825382083 0.4836275714410636  
0.3751054404483740 0.4614243665987854 0.5454439677021296  
0.5799613769541511 0.5295063918762724 0.4782491188599101  
0.5388956939778755 0.4229621873153157 0.5208177693890718  
0.6255211580382508 0.5421807695419959 0.4638816207311572  
0.5633023736863029 0.3804942706523615 0.5275961643588283  
0.6375103602394476 0.5344941925298557 0.4194860929510872  
0.6563345133553232 0.5591367469815011 0.4945903845873287  
0.5671774641708205 0.3514999980706461 0.4912723495792448  
0.5839098206014948 0.3709244387096822 0.5683736623273018  
0.6815489291779132 0.5441452603797488 0.4041819485773237  
0.7007941530782789 0.5691873708506691 0.4806995583667342  
0.5922236110694336 0.3112089128902855 0.4948801061455181  
0.6090622182691826 0.3307705647902413 0.5735569981216666  
0.6930548120932276 0.5362726202275432 0.3593946740653888  
0.7129873900984796 0.5619598582795913 0.4351822621340095  
0.7321638254627791 0.5857401445874225 0.5114384257388058  
0.5964108131716070 0.2827934800491504 0.4578130579774932  
0.6126448277561928 0.3008589303415054 0.5366203230335312  
0.6301093505261910 0.3211358980294287 0.6143683341743474  
0.4828180642365774 0.5828085929349397 0.5908097696040072  
0.3848273792558801 0.4822059681814027 0.6130103957525083  
0.3581046126196183 0.4433250952100246 0.4788735474048287  
0.4190941248244361 0.6039629245808826 0.4176896779233246  
0.4475662733926638 0.6477676801620107 0.5503776810964393  
0.2553651578830687 0.4240403947744684 0.5801944098180304  
0.3750150399180348 0.7358976859313862 0.4609645146282858  
0.6125114093037706 0.5189662198272734 0.3981137390106896

0.6458359892174887 0.5621026983414255 0.5292807523530039  
 0.5521853381778443 0.3623417939184810 0.4599761456046939  
 0.5818735735654936 0.3959385759618050 0.5947237054899118  
 0.7444114209368810 0.5756365287862654 0.4227382928642471  
 0.6260550582729724 0.2674016806602833 0.5420058169604917  
 0.3302575239549946 0.7209772885966885 0.4109691130799420  
 0.2180959278032624 0.4290813480540637 0.5231337158653110  
 0.4046795750114872 0.6329942782680097 0.3607846829772268  
 0.3159253376301025 0.4029793759770915 0.4485984711405803  
 0.5495777641680357 0.3084284178198412 0.4237638681637608  
 0.7558679919615600 0.5362149470038218 0.3674639533369280  
 0.6469158775325856 0.2507361952058832 0.4785601049603659  
 0.5983967831753675 0.3632745677379960 0.6495283560346481  
 0.6709804792808426 0.2788175147596209 0.5912205899611983  
 0.7832710824012998 0.5703358362241984 0.4776316005699001  
 0.6909812126619528 0.6029542116994920 0.5565596136418327  
 0.3599962410235313 0.4688062751118434 0.6726815721204403  
 0.2404193836221473 0.4604813878099007 0.6346354210839708  
 0.3528152647660884 0.7559034496428384 0.5223458728640817  
 0.4527656341670070 0.7076371732625774 0.5815758851859933  
 0.6338415223154013 0.5302228533964406 0.3379693023111874

**Os\*-V**

1.0000000000000000

30.0000000000000000 0.0000000000000000 0.0000000000000000  
 0.0000000000000000 30.0000000000000000 0.0000000000000000  
 0.0000000000000000 0.0000000000000000 30.0000000000000000

Os V O C Li H

1 1 26 36 1 28

**Direct**

0.5196089753785832 0.5118799449917228 0.5419264943568686  
 0.4931650377120320 0.4912431742491687 0.4717131506682656  
 0.3290058344719388 0.4731956390634451 0.6815496073259797  
 0.2834582779682976 0.4047788025905377 0.4500518494925257  
 0.3787595505678431 0.6519430056629525 0.3554898462148913  
 0.4256661762450678 0.7251954933135706 0.5853171107646975  
 0.2273936411133715 0.4115678901772306 0.4973203506041249  
 0.4788867896233660 0.5736912710485333 0.5297375112202799  
 0.4474991714444712 0.4897194994217396 0.5617756276653303  
 0.3420477447576842 0.7095691745024592 0.3828547079792270  
 0.3749802232706902 0.7610765949753002 0.5456311132732471  
 0.4321572080873373 0.4695620170301425 0.4906354143244093  
 0.4648586074636659 0.5534238785350674 0.4587094986300249  
 0.2598129168898634 0.4587953006480726 0.6607341812105320  
 0.5700461602352065 0.5345511572752008 0.5198823696310279  
 0.5384190227239734 0.4512112317284101 0.5534500166697757  
 0.5201396694906842 0.4302663643881194 0.4832446567810861



0.5527063648569109 0.5136716759100982 0.4494878582302226  
0.7348476546792807 0.5381569533645241 0.3426928979310001  
0.7232253651104689 0.6001732978157499 0.5529875739876945  
0.7763282840139295 0.5891813222453270 0.5032486667986518  
0.5734102963787300 0.2866872844405375 0.4193590099066998  
0.6242850346462929 0.2475032542814921 0.4553979267590494  
0.6599583587492938 0.2879720973751747 0.6204579097180114  
0.6239249081054381 0.3433682456122571 0.6529027361643106  
0.6640367310561059 0.5257048221961854 0.3266781202932063  
0.5236593401446215 0.5307663722257495 0.6051197903015019  
0.5360846994549169 0.5747525958376974 0.6157509833689880  
0.3024874586069578 0.4625454726711735 0.6467587828323189  
0.2717434964891760 0.4172276454078293 0.4916708704270532  
0.3716025197007377 0.6769401373876583 0.3921780439317525  
0.4032663739435137 0.7260275647999183 0.5461858388650949  
0.4615166531389020 0.5811281829673155 0.4902994931124431  
0.4208932329454884 0.4740708854978262 0.5315016917469956  
0.3611585302614481 0.4674802681185791 0.5896204897824965  
0.3457782701917171 0.4450303880552841 0.5130407646255958  
0.4167146881006522 0.6307040728224635 0.4422462909414622  
0.4328559868074071 0.6550049271732329 0.5179526368039861  
0.2868653185011802 0.4389869560409054 0.5695854004562347  
0.3878266723734871 0.7027086347912387 0.4687886800788749  
0.3166225299153848 0.4564136062118344 0.6024785125805175  
0.3010004503659686 0.4335988030656068 0.5244365849651067  
0.3917371575401978 0.6703396383840275 0.4339797345346759  
0.4079024439184580 0.6950346658841049 0.5113575444073755  
0.4371048623035613 0.6235395825382083 0.4836275714410636  
0.3751054404483740 0.4614243665987854 0.5454439677021296  
0.5799613769541511 0.5295063918762724 0.4782491188599101  
0.5388956939778755 0.4229621873153157 0.5208177693890718  
0.6255211580382508 0.5421807695419959 0.4638816207311572  
0.5633023736863029 0.3804942706523615 0.5275961643588283  
0.6375103602394476 0.5344941925298557 0.4194860929510872  
0.6563345133553232 0.5591367469815011 0.4945903845873287  
0.5671774641708205 0.3514999980706461 0.4912723495792448  
0.5839098206014948 0.3709244387096822 0.5683736623273018  
0.6815489291779132 0.5441452603797488 0.4041819485773237  
0.7007941530782789 0.5691873708506691 0.4806995583667342  
0.5922236110694336 0.3112089128902855 0.4948801061455181  
0.6090622182691826 0.3307705647902413 0.5735569981216666  
0.6930548120932276 0.5362726202275432 0.3593946740653888  
0.7129873900984796 0.5619598582795913 0.4351822621340095  
0.7321638254627791 0.5857401445874225 0.5114384257388058  
0.5964108131716070 0.2827934800491504 0.4578130579774932  
0.6126448277561928 0.3008589303415054 0.5366203230335312

0.6301093505261910 0.3211358980294287 0.6143683341743474  
 0.4828180642365774 0.5828085929349397 0.5908097696040072  
 0.3848273792558801 0.4822059681814027 0.6130103957525083  
 0.3581046126196183 0.4433250952100246 0.4788735474048287  
 0.4190941248244361 0.6039629245808826 0.4176896779233246  
 0.4475662733926638 0.6477676801620107 0.5503776810964393  
 0.2553651578830687 0.4240403947744684 0.5801944098180304  
 0.3750150399180348 0.7358976859313862 0.4609645146282858  
 0.6125114093037706 0.5189662198272734 0.3981137390106896  
 0.6458359892174887 0.5621026983414255 0.5292807523530039  
 0.5521853381778443 0.3623417939184810 0.4599761456046939  
 0.5818735735654936 0.3959385759618050 0.5947237054899118  
 0.7444114209368810 0.5756365287862654 0.4227382928642471  
 0.6260550582729724 0.2674016806602833 0.5420058169604917  
 0.3302575239549946 0.7209772885966885 0.4109691130799420  
 0.2180959278032624 0.4290813480540637 0.5231337158653110  
 0.4046795750114872 0.6329942782680097 0.3607846829772268  
 0.3159253376301025 0.4029793759770915 0.4485984711405803  
 0.5495777641680357 0.3084284178198412 0.4237638681637608  
 0.7558679919615600 0.5362149470038218 0.3674639533369280  
 0.6469158775325856 0.2507361952058832 0.4785601049603659  
 0.5983967831753675 0.3632745677379960 0.6495283560346481  
 0.6709804792808426 0.2788175147596209 0.5912205899611983  
 0.7832710824012998 0.5703358362241984 0.4776316005699001  
 0.6909812126619528 0.6029542116994920 0.5565596136418327  
 0.3599962410235313 0.4688062751118434 0.6726815721204403  
 0.2404193836221473 0.4604813878099007 0.6346354210839708  
 0.3528152647660884 0.7559034496428384 0.5223458728640817  
 0.4527656341670070 0.7076371732625774 0.5815758851859933  
 0.6338415223154013 0.5302228533964406 0.3379693023111874

**V\*-Rh DMSC**

1.0000000000000000

30.0000000000000000 0.0000000000000000 0.0000000000000000  
 0.0000000000000000 30.0000000000000000 0.0000000000000000  
 0.0000000000000000 0.0000000000000000 30.0000000000000000

Rh V O C Li H

1 1 26 36 1 28

Direct

0.4825806509738823 0.4910659308125151 0.4704651223089417  
 0.5089783561142950 0.5114135607851998 0.5412294001803877  
 0.3293406398220317 0.4732888890021628 0.6811381874126503  
 0.2832702702758352 0.4047761828486501 0.4496538976029160  
 0.3790469702963504 0.6514782592892679 0.3551715924642167  
 0.4262469019219150 0.7245279858315700 0.5849900698080891  
 0.2273972408109069 0.4116950093476029 0.4971669207202543

0.4792394489389634 0.5731464289673366 0.5301581608459679  
0.4475315935554994 0.4896354181054527 0.5617286186300031  
0.3424743008888028 0.7089287762771136 0.3831064257115815  
0.3755863357601767 0.7601253924420333 0.5451172067089262  
0.4327859702799562 0.4689109905818601 0.4907290046904564  
0.4648151149276774 0.5516497413150312 0.4597710057512412  
0.2601367704798135 0.4590612771797872 0.6604121740287897  
0.5695454020620021 0.5342009925764565 0.5203068254048004  
0.5372799162380424 0.4514369111503172 0.5528998049380796  
0.5199985275720527 0.4314111351171175 0.4822992342389122  
0.5520538929949167 0.5133467098563768 0.4499383114409297  
0.7342319669918302 0.5380351863770846 0.3431303403971631  
0.7228053268759840 0.6000063319313864 0.5530023422032897  
0.7757219587143902 0.5891572363207082 0.5030749952768802  
0.5733439909029576 0.2866247931904402 0.4187400598684149  
0.6241132969487517 0.2478722638943811 0.4554475422309368  
0.6592850127751715 0.2889502034254951 0.6199998126849755  
0.6233494238960813 0.3444575881641044 0.6523004688624264  
0.6635565184944131 0.5254696717027961 0.3265869942231945  
0.5304953249783232 0.5404605870157183 0.6144777120810895  
0.5367387831502087 0.5841881079309278 0.6257222573528628  
0.3027987845468357 0.4625594924260564 0.6464237435928787  
0.2717470222319119 0.4171971056983848 0.4913658035870283  
0.3720361161091195 0.6761832765372777 0.3921041315090703  
0.4038793767709584 0.7251012002662981 0.5459212763215527  
0.4616532487751207 0.5803137134076318 0.4910149035779405  
0.4211285359743304 0.4737523168504346 0.5316455273049471  
0.3614223935030788 0.4671799501319918 0.5892563310569167  
0.3459460426019378 0.4447905419926976 0.5126228823719107  
0.4171447024298547 0.6295327450621112 0.4419882622171030  
0.4332575224506447 0.6538822962843405 0.5178903644534562  
0.2870369936428968 0.4388078267616004 0.5692904547592696  
0.3884144555615626 0.7016414428709625 0.4686223256304288  
0.3168837253084460 0.4562320913496379 0.6021875581359711  
0.3011352392546537 0.4334534473153550 0.5240597414372828  
0.3922565332592521 0.6692428367981013 0.4337970004454725  
0.4084756314013601 0.6939596150201244 0.5112084243407823  
0.4374545617838234 0.6224052370579151 0.4835085004267793  
0.3753317677949343 0.4610801957842742 0.5450858280233989  
0.5795123507784928 0.5291570808780807 0.4788994701723226  
0.5384829711169874 0.4235902131432337 0.5201893093269625  
0.6249197627174679 0.5416835234935642 0.4641003021282883  
0.5627849723451158 0.3811592093148504 0.5266094759244029  
0.6367477811117985 0.5340944283224900 0.4195713810344772  
0.6557658361548838 0.5587161525035810 0.4947576066589928  
0.5667597056365740 0.3520734436833348 0.4903068335047571

|                    |                    |                    |
|--------------------|--------------------|--------------------|
| 0.5832733151849103 | 0.3717125678276683 | 0.5674973924647287 |
| 0.6807075453768237 | 0.5439569467132119 | 0.4042275421962657 |
| 0.7002012098020345 | 0.5689522086856329 | 0.4807566495890777 |
| 0.5917382490388999 | 0.3117628401677747 | 0.4942419804156994 |
| 0.6084379357490500 | 0.3315976739833568 | 0.5729495785205050 |
| 0.6923129091241991 | 0.5361368107115939 | 0.3595029384782528 |
| 0.7122291704289632 | 0.5618240068007406 | 0.4351588520194319 |
| 0.7315999480168107 | 0.5855411403425359 | 0.5113697636023899 |
| 0.5961210829948732 | 0.2831092739304057 | 0.4574046926062654 |
| 0.6120494666780002 | 0.3015115732189499 | 0.5361068592990071 |
| 0.6294627506115363 | 0.3221256410021312 | 0.6137690515876564 |
| 0.4880210037586682 | 0.5799672664934556 | 0.5914171872126185 |
| 0.3852090341248139 | 0.4818940158772472 | 0.6124828498090422 |
| 0.3581371089339545 | 0.4431615961171207 | 0.4784115617372344 |
| 0.4193585732692700 | 0.6028345955838922 | 0.4174085352516417 |
| 0.4478741424886223 | 0.6463278393667058 | 0.5502642872834768 |
| 0.2555686527240525 | 0.4237893338079528 | 0.5799648595020981 |
| 0.3757653665434872 | 0.7348798024478966 | 0.4607449038986922 |
| 0.6119344283995967 | 0.5184896302166747 | 0.3980803389804310 |
| 0.6453021840160258 | 0.5616844320996542 | 0.5294443703679782 |
| 0.5520631220352960 | 0.3626689194687269 | 0.4587788410337883 |
| 0.5810903808105981 | 0.3967902371240785 | 0.5937477836663787 |
| 0.7434913241261335 | 0.5758541396288509 | 0.4226497496606690 |
| 0.6252542400483304 | 0.2679890991533495 | 0.5417425286075443 |
| 0.3307871642443426 | 0.7201283565165814 | 0.4113502370811761 |
| 0.2182794437116147 | 0.4292670696799525 | 0.5229992184635326 |
| 0.4052570205984594 | 0.6328649522541088 | 0.3600717858822632 |
| 0.3156840804233118 | 0.4024115925554407 | 0.4483072920712285 |
| 0.5491488615852694 | 0.3079371960527016 | 0.4230701717928789 |
| 0.7549273534128332 | 0.5360848557944249 | 0.3681618196269271 |
| 0.6465747433305191 | 0.2514325267104424 | 0.4787388853531656 |
| 0.5977752186085755 | 0.3643186125892225 | 0.6490379367765289 |
| 0.6702689414509608 | 0.2796222581594099 | 0.5908030857935105 |
| 0.7827057858584109 | 0.5702404395007525 | 0.4775056820875563 |
| 0.6906077581959977 | 0.6027564505443560 | 0.5567458342285936 |
| 0.3603567852781861 | 0.4691328041333450 | 0.6722106750433249 |
| 0.2407775990439705 | 0.4606175600239147 | 0.6342867223527103 |
| 0.3534245395506319 | 0.7546518906954758 | 0.5218976333100205 |
| 0.4526047697347345 | 0.7057160943221263 | 0.5818531025495567 |
| 0.6333087147839813 | 0.5304719605715441 | 0.3374881962187667 |

**Au\*-Cu**

1.0000000000000000

30.0000000000000000 0.0000000000000000 0.0000000000000000

0.0000000000000000 30.0000000000000000 0.0000000000000000

0.0000000000000000 0.0000000000000000 30.0000000000000000

Au Cu O C Li H  
1 1 26 36 1 28

Direct

|                    |                    |                    |
|--------------------|--------------------|--------------------|
| 0.5062389561664981 | 0.4980289359643820 | 0.4826511820111634 |
| 0.4863727301354393 | 0.5034747591748393 | 0.6024444280178979 |
| 0.3140368362751275 | 0.4671910376465137 | 0.6751078639924994 |
| 0.2798449201113011 | 0.4007991526501111 | 0.4417049848697241 |
| 0.3814265594019332 | 0.6475400570158346 | 0.3518995805718017 |
| 0.4217185085434351 | 0.7282106229444389 | 0.5796735269090521 |
| 0.2216469067703714 | 0.4076607788658962 | 0.4860526530529490 |
| 0.4744128251044511 | 0.5780591340708496 | 0.5354571168189266 |
| 0.4374857308908577 | 0.4669512882522137 | 0.5732682398426573 |
| 0.3430717115736344 | 0.7051018257365080 | 0.3766720547235654 |
| 0.3733566039093802 | 0.7640166766625608 | 0.5377485288925780 |
| 0.4308663995341334 | 0.4761480597221419 | 0.4977808449119578 |
| 0.4691603526327953 | 0.5540460294025343 | 0.4637757392003744 |
| 0.2457735674952845 | 0.4532334656445614 | 0.6519872643301087 |
| 0.5796049929326450 | 0.5512239371747870 | 0.5165057174856121 |
| 0.5639829680146632 | 0.4581291162402381 | 0.5493508479444388 |
| 0.5186781573955742 | 0.4371647618793139 | 0.4924144841147310 |
| 0.5566201813011454 | 0.5149534820831577 | 0.4543090373750273 |
| 0.7343535628186176 | 0.5338006467381510 | 0.3312342098096408 |
| 0.7335816719799420 | 0.6016715603077217 | 0.5393110164822024 |
| 0.7848503138676988 | 0.5883853870180039 | 0.4884325246744922 |
| 0.5681947276684430 | 0.2894593710565981 | 0.4153017413743339 |
| 0.6181833601368958 | 0.2481073971833549 | 0.4500143575739644 |
| 0.6569199535791067 | 0.2818588862780727 | 0.6159349346574245 |
| 0.6252522695640748 | 0.3398060115541802 | 0.6481580394458919 |
| 0.6627424439121369 | 0.5233020734878461 | 0.3183478025524237 |
| 0.5716309463185013 | 0.5408542902681930 | 0.6257079269335150 |
| 0.5288955822591834 | 0.5371742811246324 | 0.6404793603201603 |
| 0.2888262273772194 | 0.4570108067101215 | 0.6395401595831558 |
| 0.2661668467874277 | 0.4133401590191193 | 0.4825715186179678 |
| 0.3729638201511778 | 0.6733322037225852 | 0.3875660152994558 |
| 0.4004956878294407 | 0.7283488278035830 | 0.5403606168944134 |
| 0.4623598112450606 | 0.5821831911231210 | 0.4958719146800850 |
| 0.4160223936548467 | 0.4674401405542071 | 0.5361040797872334 |
| 0.3500618752679095 | 0.4611158250965650 | 0.5854985532166428 |
| 0.3397098620074547 | 0.4409692835757709 | 0.5079528886045402 |
| 0.4178816573854207 | 0.6292330903934353 | 0.4406564975212511 |
| 0.4303743537365221 | 0.6562603948058299 | 0.5156020113537614 |
| 0.2771223478188005 | 0.4343579977042575 | 0.5609838977730519 |
| 0.3869862369479930 | 0.7016799518505810 | 0.4633968135159694 |
| 0.3047969788474083 | 0.4511062230498167 | 0.5956837957625516 |
| 0.2940457518760885 | 0.4296082800346945 | 0.5167727868018602 |
| 0.3923470185635142 | 0.6681376446074921 | 0.4301801874177817 |

0.4057020248305083 0.6958099582016142 0.5066185974917806  
0.4366556893320050 0.6238345201232656 0.4828579950890246  
0.3673106339919879 0.4555792496028599 0.5425445344054851  
0.5851003006578791 0.5366995992934975 0.4774862466485537  
0.5486538066961618 0.4301497321094974 0.5221007020959700  
0.6305434930092162 0.5452069317173791 0.4567291762062682  
0.5676475691681032 0.3836067820355348 0.5247846627676505  
0.6402084854026963 0.5346991027220568 0.4124459498830502  
0.6637244618203562 0.5622792581070298 0.4845956703879994  
0.5672455404068406 0.3547269558249835 0.4883336283533253  
0.5888524810115453 0.3714381141512853 0.5643996050872397  
0.6838376245889088 0.5425916390662728 0.3947233198966870  
0.7079070863976279 0.5696323380761960 0.4687887378946327  
0.5895531595741026 0.3125874288298796 0.4906914718247221  
0.6098158338936147 0.3290874774735720 0.5689330157466366  
0.6932860192402173 0.5334926015099080 0.3495240945254341  
0.7174213410356778 0.5603374228268915 0.4232664174039463  
0.7409617250136917 0.5861332154143838 0.4979926357210245  
0.5916881730104476 0.2843363350277058 0.4531919207278061  
0.6100466690709380 0.2997433099574990 0.5316428924848082  
0.6299235522359387 0.3172486028666556 0.6097962685704827  
0.5673427433474364 0.5183802922185408 0.5665730047140859  
0.3729240780553529 0.4744199412344388 0.6104332965554257  
0.3536033495147459 0.4397749236466230 0.4742969580986933  
0.4221094337818616 0.6018458186009890 0.4170013836549613  
0.4442714579203006 0.6483865562490151 0.5483780085517881  
0.2445526402301960 0.4202143381546498 0.5693258227045156  
0.3729249418842556 0.7340285812317822 0.4540404991502587  
0.6138355790398892 0.5189808304713416 0.3928436167622599  
0.6540970885821865 0.5682895846454901 0.5191882412627409  
0.5515464226458346 0.3665946289562552 0.4576922179933718  
0.5903722146195294 0.3968372299097102 0.5904636456827270  
0.7489834651476022 0.5717391210976317 0.4089565860439990  
0.6212445250436280 0.2652936211222826 0.5358735327762194  
0.3308772369623103 0.7175741175438313 0.4041494225214724  
0.2109131204169075 0.4247183722026989 0.5115993381666585  
0.4064469530289660 0.6279375443376006 0.3589399409109921  
0.3123624437085269 0.3995605955202005 0.4417071351993455  
0.5453502157463987 0.3121253028033122 0.4201511814710128  
0.7563628679341836 0.5332506813720792 0.3552084449468110  
0.6413526913653734 0.2504669069676947 0.4727899220491904  
0.6020692848912842 0.3623950561761232 0.6443140857098627  
0.6665810267140562 0.2710772653305362 0.5868066679138524  
0.7909559339066472 0.5687815811011059 0.4631902463262851  
0.7014822132132883 0.6040271925488064 0.5443052588505755  
0.3454823894738500 0.4655263478272886 0.6667233831745758

0.2271672116868537 0.4542995763773644 0.6253649522852341  
0.3528281110163620 0.7596190029820403 0.5129049596878147  
0.4439024912223025 0.7043281361150178 0.5796077502842168  
0.6330972321218257 0.5284312404520889 0.3308129864197155

**Cu\*-Pt**

1.0000000000000000  
30.0000000000000000 0.0000000000000000 0.0000000000000000  
0.0000000000000000 30.0000000000000000 0.0000000000000000  
0.0000000000000000 0.0000000000000000 30.0000000000000000

Pt Cu O C Li H  
1 1 26 36 1 28

**Direct**

0.4863727301354393 0.5034747591748393 0.6024444280178979  
0.4962389561664981 0.4980289359643820 0.4826511820111634  
0.3140368362751275 0.4671910376465137 0.6751078639924994  
0.2798449201113011 0.4007991526501111 0.4417049848697241  
0.3814265594019332 0.6475400570158346 0.3518995805718017  
0.4217185085434351 0.7282106229444389 0.5796735269090521  
0.2216469067703714 0.4076607788658962 0.4860526530529490  
0.4744128251044511 0.5780591340708496 0.5354571168189266  
0.4374857308908577 0.4669512882522137 0.5732682398426573  
0.3430717115736344 0.7051018257365080 0.3766720547235654  
0.3733566039093802 0.7640166766625608 0.5377485288925780  
0.4308663995341334 0.4761480597221419 0.4977808449119578  
0.4691603526327953 0.5540460294025343 0.4637757392003744  
0.2457735674952845 0.4532334656445614 0.6519872643301087  
0.5796049929326450 0.5512239371747870 0.5165057174856121  
0.5639829680146632 0.4581291162402381 0.5493508479444388  
0.5186781573955742 0.4371647618793139 0.4924144841147310  
0.5566201813011454 0.5149534820831577 0.4543090373750273  
0.7343535628186176 0.5338006467381510 0.3312342098096408  
0.7335816719799420 0.6016715603077217 0.5393110164822024  
0.7848503138676988 0.5883853870180039 0.4884325246744922  
0.5681947276684430 0.2894593710565981 0.4153017413743339  
0.6181833601368958 0.2481073971833549 0.4500143575739644  
0.6569199535791067 0.2818588862780727 0.6159349346574245  
0.6252522695640748 0.3398060115541802 0.6481580394458919  
0.6627424439121369 0.5233020734878461 0.3183478025524237  
0.5716309463185013 0.5408542902681930 0.6257079269335150  
0.5288955822591834 0.5371742811246324 0.6404793603201603  
0.2888262273772194 0.4570108067101215 0.6395401595831558  
0.2661668467874277 0.4133401590191193 0.4825715186179678  
0.3729638201511778 0.6733322037225852 0.3875660152994558  
0.4004956878294407 0.7283488278035830 0.5403606168944134  
0.4623598112450606 0.5821831911231210 0.4958719146800850

0.4160223936548467 0.4674401405542071 0.5361040797872334  
0.3500618752679095 0.4611158250965650 0.5854985532166428  
0.3397098620074547 0.4409692835757709 0.5079528886045402  
0.4178816573854207 0.6292330903934353 0.4406564975212511  
0.4303743537365221 0.6562603948058299 0.5156020113537614  
0.2771223478188005 0.4343579977042575 0.5609838977730519  
0.3869862369479930 0.7016799518505810 0.4633968135159694  
0.3047969788474083 0.4511062230498167 0.5956837957625516  
0.2940457518760885 0.4296082800346945 0.5167727868018602  
0.3923470185635142 0.6681376446074921 0.4301801874177817  
0.4057020248305083 0.6958099582016142 0.5066185974917806  
0.4366556893320050 0.6238345201232656 0.4828579950890246  
0.3673106339919879 0.4555792496028599 0.5425445344054851  
0.5851003006578791 0.5366995992934975 0.4774862466485537  
0.5486538066961618 0.4301497321094974 0.5221007020959700  
0.6305434930092162 0.5452069317173791 0.4567291762062682  
0.5676475691681032 0.3836067820355348 0.5247846627676505  
0.6402084854026963 0.5346991027220568 0.4124459498830502  
0.6637244618203562 0.5622792581070298 0.4845956703879994  
0.5672455404068406 0.3547269558249835 0.4883336283533253  
0.5888524810115453 0.3714381141512853 0.5643996050872397  
0.6838376245889088 0.5425916390662728 0.3947233198966870  
0.7079070863976279 0.5696323380761960 0.4687887378946327  
0.5895531595741026 0.3125874288298796 0.4906914718247221  
0.6098158338936147 0.3290874774735720 0.5689330157466366  
0.6932860192402173 0.5334926015099080 0.3495240945254341  
0.7174213410356778 0.5603374228268915 0.4232664174039463  
0.7409617250136917 0.5861332154143838 0.4979926357210245  
0.5916881730104476 0.2843363350277058 0.4531919207278061  
0.6100466690709380 0.2997433099574990 0.5316428924848082  
0.6299235522359387 0.3172486028666556 0.6097962685704827  
0.5673427433474364 0.5183802922185408 0.5665730047140859  
0.3729240780553529 0.4744199412344388 0.6104332965554257  
0.3536033495147459 0.4397749236466230 0.4742969580986933  
0.4221094337818616 0.6018458186009890 0.4170013836549613  
0.4442714579203006 0.6483865562490151 0.5483780085517881  
0.2445526402301960 0.4202143381546498 0.5693258227045156  
0.3729249418842556 0.7340285812317822 0.4540404991502587  
0.6138355790398892 0.5189808304713416 0.3928436167622599  
0.6540970885821865 0.5682895846454901 0.5191882412627409  
0.5515464226458346 0.3665946289562552 0.4576922179933718  
0.5903722146195294 0.3968372299097102 0.5904636456827270  
0.7489834651476022 0.5717391210976317 0.4089565860439990  
0.6212445250436280 0.2652936211222826 0.5358735327762194  
0.3308772369623103 0.7175741175438313 0.4041494225214724  
0.2109131204169075 0.4247183722026989 0.5115993381666585



|                    |                    |                    |
|--------------------|--------------------|--------------------|
| 0.4064469530289660 | 0.6279375443376006 | 0.3589399409109921 |
| 0.3123624437085269 | 0.3995605955202005 | 0.4417071351993455 |
| 0.5453502157463987 | 0.3121253028033122 | 0.4201511814710128 |
| 0.7563628679341836 | 0.5332506813720792 | 0.3552084449468110 |
| 0.6413526913653734 | 0.2504669069676947 | 0.4727899220491904 |
| 0.6020692848912842 | 0.3623950561761232 | 0.6443140857098627 |
| 0.6665810267140562 | 0.2710772653305362 | 0.5868066679138524 |
| 0.7909559339066472 | 0.5687815811011059 | 0.4631902463262851 |
| 0.7014822132132883 | 0.6040271925488064 | 0.5443052588505755 |
| 0.3454823894738500 | 0.4655263478272886 | 0.6667233831745758 |
| 0.2271672116868537 | 0.4542995763773644 | 0.6253649522852341 |
| 0.3528281110163620 | 0.7596190029820403 | 0.5129049596878147 |
| 0.4439024912223025 | 0.7043281361150178 | 0.5796077502842168 |
| 0.6330972321218257 | 0.5284312404520889 | 0.3308129864197155 |

### Sc\*-Sc

1.0000000000000000

30.0000000000000000 0.0000000000000000 0.0000000000000000

0.0000000000000000 30.0000000000000000 0.0000000000000000

0.0000000000000000 0.0000000000000000 30.0000000000000000

Sc O C Li H

2 26 36 1 28

### Direct

0.5095199419246419 0.5140880649701984 0.5578305360609658

0.4898323190738234 0.4884727072006048 0.4601025838208951

0.3226846705183248 0.4699355757241074 0.6804435856304977

0.2854303148516147 0.4029434398865570 0.4470154407147564

0.3757576857957022 0.6654276271630695 0.3513046572179815

0.4392157414614987 0.6956586459539970 0.5867890671114825

0.2279028475114181 0.4104297960442170 0.4926033793986583

0.4798953782930088 0.5499133445223310 0.5023037825625452

0.4451200136102602 0.4887525934194848 0.5650614568640964

0.3450800869519042 0.7193012152011586 0.3911114864491150

0.3898125204625572 0.7403568854950471 0.5554832324239934

0.4324548688869571 0.4696710189310623 0.4932626327561332

0.4587285181236157 0.5434131158783699 0.4315748414711404

0.2542521959437214 0.4572177815973040 0.6564319584441383

0.5725115641962906 0.5356109973533645 0.5237239200419713

0.5217135346280208 0.4556853503224307 0.5186353325642754

0.5143318841048120 0.4238846917858581 0.4522143983201872

0.5529218229347505 0.5156508077313133 0.4540490219542321

0.7303872468806784 0.5360025925780071 0.3396238103439790

0.7269123509701549 0.6074359446243272 0.5465632749292743

0.7790355557042498 0.5913973102701094 0.4964601706880175

0.5761164583704982 0.2699557239103705 0.4214154399347292

0.6251597437736942 0.2413392368974412 0.4683318776695229

0.6470948097381344 0.3130970590417699 0.6225969188034594  
0.6077686395088037 0.3720007411611633 0.6426775820360049  
0.6589377079149455 0.5240025890066300 0.3261394615833980  
0.5489614208481146 0.5062303630812561 0.6106228033094723  
0.5314391379903168 0.5534770573937267 0.6063618683104784  
0.2975730105810462 0.4601706769580638 0.6444474139643785  
0.2724575863782260 0.4153051154742207 0.4883101508537824  
0.3726242705625625 0.6837440487291928 0.3922817436979854  
0.4153395343585026 0.7037838826262351 0.5495795567187349  
0.4594968287449605 0.5673535781267530 0.4676470342645654  
0.4195134432052520 0.4733450991173228 0.5342161970445456  
0.3582732779939104 0.4651831321273395 0.5895083644882534  
0.3455616139051909 0.4432371549856716 0.5121322586222081  
0.4165353934639978 0.6264210226411719 0.4308063809215731  
0.4381156263641639 0.6361685300088396 0.5090253092505819  
0.2847785751892587 0.4364315270925905 0.5668506482600748  
0.3949151313669697 0.6948162792050600 0.4706695787692463  
0.3134340250373226 0.4539298724964315 0.6007778227880342  
0.3006143083632520 0.4314064731637383 0.5221057078815806  
0.3945115836257214 0.6684571901957933 0.4308254469992236  
0.4162179263487890 0.6784048843992122 0.5101643035057605  
0.4384109643498828 0.6108942463319685 0.4694270672347786  
0.3737596925852178 0.4596641050766868 0.5456823134691376  
0.5817770586588192 0.5312384112178357 0.4817945106996975  
0.5299287453291431 0.4213903807947280 0.4925417792350564  
0.6261689472135800 0.5438825367893197 0.4649256273304251  
0.5553016647649130 0.3832924065739509 0.5080499443085472  
0.6363230088808987 0.5349458758108631 0.4201321276294047  
0.6585983847956530 0.5624110846940668 0.4933450848661267  
0.5631052922097701 0.3479815947879228 0.4780130401960248  
0.5730543485770953 0.3823611863027913 0.5515758920194651  
0.6795766422366895 0.5441475673891971 0.4025667561815902  
0.7024509817769236 0.5718382069118957 0.4771594587719711  
0.5885635144935718 0.3102238835506195 0.4913853591109936  
0.5986811234571811 0.3449750957013326 0.5659173001639047  
0.6891366429503525 0.5350709780302267 0.3576600988138785  
0.7127509415640967 0.5626863948378125 0.4314927569242084  
0.7349303053638080 0.5897149763920192 0.5057411743789000  
0.5962461166894638 0.2751012603250121 0.4612932112831409  
0.6059505045475715 0.3085431114788264 0.5358319454343469  
0.6169524529308272 0.3436660546984912 0.6090802431003307  
0.5890721382613107 0.5451209268776868 0.5841669427177224  
0.3809257750012958 0.4804079824894060 0.6135501879017072  
0.3584843747720737 0.4423838433074888 0.4781503821944197  
0.4152254501255854 0.6040932844062573 0.4021443902892125  
0.4527742308382533 0.6215220134025079 0.5389145391009729

|                    |                    |                    |
|--------------------|--------------------|--------------------|
| 0.2536282098018837 | 0.4201803221046387 | 0.5765970999608303 |
| 0.3862978355318883 | 0.7301722499102168 | 0.4685542583749808 |
| 0.6108678550650809 | 0.5183600408716138 | 0.4001986375953745 |
| 0.6507957749446248 | 0.5670159857913818 | 0.5285426826265142 |
| 0.5509368967305881 | 0.3519384191333744 | 0.4439873837359505 |
| 0.5685633557820214 | 0.4116846899496707 | 0.5726323812226825 |
| 0.7431605531039338 | 0.5768054485945613 | 0.4171949324636316 |
| 0.6172144425213940 | 0.2765475957217687 | 0.5492033599737716 |
| 0.3363249766345298 | 0.7261292311959775 | 0.4217475969207911 |
| 0.2184980874658018 | 0.4280171653196789 | 0.5183684026519365 |
| 0.4006570634483268 | 0.6444578001388225 | 0.3513305340502232 |
| 0.3178777924690973 | 0.4003551831598618 | 0.4469423373142783 |
| 0.5510728730392163 | 0.2906967679123454 | 0.4199487216276798 |
| 0.7520183011393250 | 0.5344546686377845 | 0.3639227923708221 |
| 0.6451198843757208 | 0.2501462350021696 | 0.4925435702701472 |
| 0.5816682798490299 | 0.3897735187859516 | 0.6347499981602400 |
| 0.6594310666100608 | 0.2990693884912480 | 0.5958574387337158 |
| 0.7849670796132778 | 0.5696464915552922 | 0.4729142214949542 |
| 0.6959018791779399 | 0.6172358025637941 | 0.5473286052307321 |
| 0.3540415028376796 | 0.4658424491651431 | 0.6727260777417995 |
| 0.2362998179160289 | 0.4594326687285802 | 0.6293357406732699 |
| 0.3667555117405470 | 0.7402316344993497 | 0.5324437082872602 |
| 0.4617783402916174 | 0.6732065412174028 | 0.5799568070004031 |
| 0.6292218444747170 | 0.5301335572108694 | 0.3379059175161775 |

**Ni\*-Ni**

1.0000000000000000

30.0000000000000000 0.0000000000000000 0.0000000000000000

0.0000000000000000 30.0000000000000000 0.0000000000000000

0.0000000000000000 0.0000000000000000 30.0000000000000000

Ni O C Li H

2 26 36 1 28

**Direct**

0.5061716119006694 0.5161813010319528 0.5488480412357478

0.4921456570772185 0.4938586436268032 0.4739302419660987

0.3228002959839556 0.4707627711451723 0.6747889899866434

0.2907241662440481 0.3993902284040403 0.4422006755423985

0.3851425514210391 0.6459962799798328 0.3511250898400381

0.4249618242354564 0.7274564621247642 0.5792405920896136

0.2323191741264187 0.4047277468409287 0.4867471830712140

0.4786710371250057 0.5751067595635332 0.5325767893670600

0.4460955958429696 0.4896117670252924 0.5630517565876476

0.3480259058421394 0.7048866960648400 0.3752007734142099

0.3770142834798256 0.7629178674090416 0.5361969361761615

0.4352980048819778 0.4712811381509485 0.4905432894757834

0.4653563111383889 0.5501502407838407 0.4625095057536268

0.2549383234980236 0.4555913700213829 0.6507279063628785  
0.5712564747472293 0.5353218647922040 0.5254494385540378  
0.5408825146594315 0.4546976118379527 0.5547570273227799  
0.5184446445562685 0.4368367002013933 0.4850891349880217  
0.5487270421520437 0.5166943114688244 0.4559741253577374  
0.7234215823864371 0.5361070332679169 0.3367600984387942  
0.7261877726068355 0.6026603837489924 0.5456581496920168  
0.7760511812521631 0.5898784215827242 0.4929555384161725  
0.5609984170451662 0.2898210419125514 0.4160009603159965  
0.6125900745969290 0.2487911809685757 0.4488230141587853  
0.6596859553115230 0.2866252448369172 0.6115491766418976  
0.6272930862446693 0.3427858407261040 0.6464238561168496  
0.6517535271026603 0.5235740981452017 0.3254019028176776  
0.5625966216486642 0.5233383848540374 0.6280467274192972  
0.5217869204994000 0.5325116097099055 0.6117350927839762  
0.2981840760455783 0.4597734365713613 0.6389036289369524  
0.2766447984107757 0.4118919009142756 0.4830495167947458  
0.3769632055646840 0.6723269885848624 0.3866683964409074  
0.4040676784102146 0.7270746294085850 0.5395038599510968  
0.4626679994214158 0.5797702385007505 0.4936342555188364  
0.4222640031076945 0.4744952537321033 0.5314447081250721  
0.3594658567473163 0.4655547008074957 0.5847216838928504  
0.3487433710301102 0.4425311879968840 0.5076237810104027  
0.4200029079265044 0.6273597773869704 0.4400690267996152  
0.4334623528266884 0.6543623796258728 0.5154143540379369  
0.2872024221737457 0.4350038749625553 0.5612152525629663  
0.3908750182271761 0.7004946699451094 0.4627416542532874  
0.3146535870478315 0.4535155274125115 0.5953957006284057  
0.3037862182872151 0.4296912938128550 0.5169201998262292  
0.3956145949640639 0.6668717849825173 0.4293790433377550  
0.4093103387437170 0.6943875169705463 0.5062104209082976  
0.4386635633915033 0.6218422942950245 0.4824432594156868  
0.3758303609424757 0.4597519610729213 0.5414830540049604  
0.5781836623085255 0.5311426114733658 0.4833460666107276  
0.5390175646926589 0.4277911555297327 0.5214019687176699  
0.6226270922563631 0.5429254331296740 0.4648420696766871  
0.5620668569558430 0.3840788314680163 0.5246798474619635  
0.6315589311205781 0.5339228904555499 0.4199096304679808  
0.6555530392889983 0.5607966763164713 0.4927368704356205  
0.5630660679365028 0.3556217804046433 0.4876674727212073  
0.5840993833924616 0.3727669897643544 0.5642601269393752  
0.6743865711352084 0.5432515223994940 0.4013698569911339  
0.6990842624010752 0.5701448217618866 0.4757010974035938  
0.5862354902636132 0.3140734157224033 0.4898024683059243  
0.6081975475422263 0.3318261109499065 0.5676902136671920  
0.6827749837427053 0.5345794353412978 0.3560775844126887

0.7080624265047301 0.5616370043115915 0.4296522879050498  
 0.7324290466570648 0.5871874575730693 0.5038792504670725  
 0.5865459528453087 0.2853300403386518 0.4527633844739002  
 0.6087128400412913 0.3023874916378093 0.5301955482979250  
 0.6307652831464964 0.3208981932564175 0.6072902828238249  
 0.5830547919505010 0.4979492089664877 0.5755440421995985  
 0.3817223175763518 0.4812824980960873 0.6088340502994638  
 0.3625117112388786 0.4412898493482100 0.4739814969395807  
 0.4230209965872255 0.5996632079711253 0.4166981672453130  
 0.4468559414972792 0.6468272098511841 0.5483962462879948  
 0.2554962231533027 0.4194723697126425 0.5703130640596283  
 0.3781348142644446 0.7333017052139379 0.4531941545540735  
 0.6053434466886010 0.5177582697296915 0.4005841924981514  
 0.6473030801395505 0.5659895542893640 0.5277782287777080  
 0.5473561040122511 0.3672976857269726 0.4570233534544218  
 0.5830608841098976 0.3966803765416482 0.5916444615067405  
 0.7384695385762039 0.5750971576182320 0.4147331737613499  
 0.6207198129651442 0.2682542785571216 0.5346028030997272  
 0.3352686627152967 0.7172241262973967 0.4024861981928286  
 0.2212052946176433 0.4223847230232270 0.5117267788621228  
 0.4105299912679940 0.6268764343899104 0.3581088107449525  
 0.3232543263756207 0.3985961602964727 0.4423126521752028  
 0.5378334068256881 0.3118297873948927 0.4221419406176373  
 0.7459274286620139 0.5346955813149417 0.3602284939533490  
 0.6369193642676747 0.2513013336601420 0.4703031262539683  
 0.6014324644551289 0.3624789744864180 0.6452674172353046  
 0.6688394053152976 0.2773333960806844 0.5817180993504868  
 0.7813426898923570 0.5700634746700411 0.4676604968689607  
 0.6944399121209559 0.6080264155537298 0.5502781538189272  
 0.3543249930837596 0.4687514736041843 0.6669231544527799  
 0.2368544601405300 0.4568815809109983 0.6236912169305985  
 0.3558398239521592 0.7575145174823616 0.5120794177068726  
 0.4482023845088167 0.7046678668782929 0.5791232177202600  
 0.6222984957658259 0.5291319338237040 0.3380739925133004

**Fe\*-Fe**

1.0000000000000000  
 30.0000000000000000 0.0000000000000000 0.0000000000000000  
 0.0000000000000000 30.0000000000000000 0.0000000000000000  
 0.0000000000000000 0.0000000000000000 30.0000000000000000

Fe O C Li H  
 2 26 36 1 28

**Direct**

0.5061716119006694 0.5161813010319528 0.5488480412357478  
 0.4921456570772185 0.4938586436268032 0.4739302419660987

0.3228002959839556 0.4707627711451723 0.6747889899866434  
0.2907241662440481 0.3993902284040403 0.4422006755423985  
0.3851425514210391 0.6459962799798328 0.3511250898400381  
0.4249618242354564 0.7274564621247642 0.5792405920896136  
0.2323191741264187 0.4047277468409287 0.4867471830712140  
0.4786710371250057 0.5751067595635332 0.5325767893670600  
0.4460955958429696 0.4896117670252924 0.5630517565876476  
0.3480259058421394 0.7048866960648400 0.3752007734142099  
0.3770142834798256 0.7629178674090416 0.5361969361761615  
0.4352980048819778 0.4712811381509485 0.4905432894757834  
0.4653563111383889 0.5501502407838407 0.4625095057536268  
0.2549383234980236 0.4555913700213829 0.6507279063628785  
0.5712564747472293 0.5353218647922040 0.5254494385540378  
0.5408825146594315 0.4546976118379527 0.5547570273227799  
0.5184446445562685 0.4368367002013933 0.4850891349880217  
0.5487270421520437 0.5166943114688244 0.4559741253577374  
0.7234215823864371 0.5361070332679169 0.3367600984387942  
0.7261877726068355 0.6026603837489924 0.5456581496920168  
0.7760511812521631 0.5898784215827242 0.4929555384161725  
0.5609984170451662 0.2898210419125514 0.4160009603159965  
0.6125900745969290 0.2487911809685757 0.4488230141587853  
0.6596859553115230 0.2866252448369172 0.6115491766418976  
0.6272930862446693 0.3427858407261040 0.6464238561168496  
0.6517535271026603 0.5235740981452017 0.3254019028176776  
0.5625966216486642 0.5233383848540374 0.6280467274192972  
0.5217869204994000 0.5325116097099055 0.6117350927839762  
0.2981840760455783 0.4597734365713613 0.6389036289369524  
0.2766447984107757 0.4118919009142756 0.4830495167947458  
0.3769632055646840 0.6723269885848624 0.3866683964409074  
0.4040676784102146 0.7270746294085850 0.5395038599510968  
0.4626679994214158 0.5797702385007505 0.4936342555188364  
0.4222640031076945 0.4744952537321033 0.5314447081250721  
0.3594658567473163 0.4655547008074957 0.5847216838928504  
0.3487433710301102 0.4425311879968840 0.5076237810104027  
0.4200029079265044 0.6273597773869704 0.4400690267996152  
0.4334623528266884 0.6543623796258728 0.5154143540379369  
0.2872024221737457 0.4350038749625553 0.5612152525629663  
0.3908750182271761 0.7004946699451094 0.4627416542532874  
0.3146535870478315 0.4535155274125115 0.5953957006284057  
0.3037862182872151 0.4296912938128550 0.5169201998262292  
0.3956145949640639 0.6668717849825173 0.4293790433377550  
0.4093103387437170 0.6943875169705463 0.5062104209082976  
0.4386635633915033 0.6218422942950245 0.4824432594156868  
0.3758303609424757 0.4597519610729213 0.5414830540049604  
0.5781836623085255 0.5311426114733658 0.4833460666107276  
0.5390175646926589 0.4277911555297327 0.5214019687176699

0.6226270922563631 0.5429254331296740 0.4648420696766871  
0.5620668569558430 0.3840788314680163 0.5246798474619635  
0.6315589311205781 0.5339228904555499 0.4199096304679808  
0.6555530392889983 0.5607966763164713 0.4927368704356205  
0.5630660679365028 0.3556217804046433 0.4876674727212073  
0.5840993833924616 0.3727669897643544 0.5642601269393752  
0.6743865711352084 0.5432515223994940 0.4013698569911339  
0.6990842624010752 0.5701448217618866 0.4757010974035938  
0.5862354902636132 0.3140734157224033 0.4898024683059243  
0.6081975475422263 0.3318261109499065 0.5676902136671920  
0.6827749837427053 0.5345794353412978 0.3560775844126887  
0.7080624265047301 0.5616370043115915 0.4296522879050498  
0.7324290466570648 0.5871874575730693 0.5038792504670725  
0.5865459528453087 0.2853300403386518 0.4527633844739002  
0.6087128400412913 0.3023874916378093 0.5301955482979250  
0.6307652831464964 0.3208981932564175 0.6072902828238249  
0.5830547919505010 0.4979492089664877 0.5755440421995985  
0.3817223175763518 0.4812824980960873 0.6088340502994638  
0.3625117112388786 0.4412898493482100 0.4739814969395807  
0.4230209965872255 0.5996632079711253 0.4166981672453130  
0.4468559414972792 0.6468272098511841 0.5483962462879948  
0.2554962231533027 0.4194723697126425 0.5703130640596283  
0.3781348142644446 0.7333017052139379 0.4531941545540735  
0.6053434466886010 0.5177582697296915 0.4005841924981514  
0.6473030801395505 0.5659895542893640 0.5277782287777080  
0.5473561040122511 0.3672976857269726 0.4570233534544218  
0.5830608841098976 0.3966803765416482 0.5916444615067405  
0.7384695385762039 0.5750971576182320 0.4147331737613499  
0.6207198129651442 0.2682542785571216 0.5346028030997272  
0.3352686627152967 0.7172241262973967 0.4024861981928286  
0.2212052946176433 0.4223847230232270 0.5117267788621228  
0.4105299912679940 0.6268764343899104 0.3581088107449525  
0.3232543263756207 0.3985961602964727 0.4423126521752028  
0.5378334068256881 0.3118297873948927 0.4221419406176373  
0.7459274286620139 0.5346955813149417 0.3602284939533490  
0.6369193642676747 0.2513013336601420 0.4703031262539683  
0.6014324644551289 0.3624789744864180 0.6452674172353046  
0.6688394053152976 0.2773333960806844 0.5817180993504868  
0.7813426898923570 0.5700634746700411 0.4676604968689607  
0.6944399121209559 0.6080264155537298 0.5502781538189272  
0.3543249930837596 0.4687514736041843 0.6669231544527799  
0.2368544601405300 0.4568815809109983 0.6236912169305985  
0.3558398239521592 0.7575145174823616 0.5120794177068726  
0.4482023845088167 0.7046678668782929 0.5791232177202600  
0.6222984957658259 0.5291319338237040 0.3380739925133004

**Pt\*-Mo DMSC**

1.0000000000000000

30.0000000000000000 0.0000000000000000 0.0000000000000000  
0.0000000000000000 30.0000000000000000 0.0000000000000000  
0.0000000000000000 0.0000000000000000 30.0000000000000000

Pt Mo O C Li H  
1 1 26 36 1 28

Direct

0.5062551050234826 0.5111161167225375 0.5390606524843155  
0.4905023956081005 0.4890832415794792 0.4620471948603221  
0.3278861749403413 0.4733006816204021 0.6764604971691527  
0.2810723427049279 0.4026937731094584 0.4457356627901781  
0.3780549358368658 0.6513289240957245 0.3511994663206889  
0.4248651073976442 0.7219112434606098 0.5819400225529759  
0.2256738519680711 0.4098120496409542 0.4937843258882857  
0.4774563584512362 0.5716973694353458 0.5259973316687820  
0.4455716189597435 0.4878571289776218 0.5570500422088138  
0.3419225923094938 0.7086747403896692 0.3800746336840222  
0.3757141452557896 0.7588427755679370 0.5415045961574561  
0.4297554309104969 0.4675810128000684 0.4849173532042811  
0.4627072648674280 0.5509923520635066 0.4538277624293615  
0.2589987761357532 0.4577877111070014 0.6559504314609983  
0.5678783420648460 0.5354807803049563 0.5181654986153195  
0.5347347929610633 0.4501553590974808 0.5491436340265171  
0.5195427321695565 0.4292304313710068 0.4771768920651309  
0.5526714748553522 0.5125610761840771 0.4472213628011103  
0.7325214007293259 0.5368399452833102 0.3398987955784573  
0.7245186462058366 0.5998563366283848 0.5488638086367439  
0.7767207679531750 0.5875523233945830 0.4982485466725924  
0.5719366903001296 0.2853585717119981 0.4156488324038205  
0.6232036257120979 0.2471352714976298 0.4522555516266538  
0.6579519160154081 0.2881740632833393 0.6159907502864038  
0.6225663508460074 0.3436061957489522 0.6488876168390105  
0.6617163943934362 0.5250402039016553 0.3235423812014432  
0.5627079463396085 0.5171452620325308 0.6223867594895525  
0.5235957474094203 0.5362890935570425 0.6045272989788506  
0.3015776092262692 0.4619467661568419 0.6418705005891974  
0.2699595726366681 0.4151932222173793 0.4875214922937485  
0.3715296023456023 0.6757910234269642 0.3884157404995068  
0.4030839707381952 0.7230871879079858 0.5426172922858601  
0.4604843458559982 0.5782320612821006 0.4864035524571972  
0.4193298264584853 0.4723929581131187 0.5258290995824028  
0.3600663888043342 0.4665285382318304 0.5843458767054349  
0.3442330540957905 0.4431205696801824 0.5080303662312804  
0.4167613830282205 0.6286345460442680 0.4378433236285204  
0.4321938324311179 0.6516709752038468 0.5143561375366542



0.2858577712893652 0.4372356324711362 0.5651570285050994  
0.3881287472825403 0.7003582393423515 0.4651261141670155  
0.3156762283883412 0.4553369230317675 0.5976112671626062  
0.2996373016982157 0.4316276833512007 0.5199218559959812  
0.3919194420857930 0.6684069549217952 0.4299958090422576  
0.4077684063323169 0.6920734414486628 0.5077480405637914  
0.4365812725436398 0.6209139793986224 0.4794706340960513  
0.3737275908691602 0.4598986639987629 0.5401771083428266  
0.5789924776072098 0.5290277114402300 0.4760098109877291  
0.5366133598501340 0.4226354251077177 0.5155854667396452  
0.6245055731315601 0.5414863727959832 0.4619740377598044  
0.5614405831223075 0.3804791598974738 0.5228986414336163  
0.6358110010220555 0.5343763114973624 0.4171218345554855  
0.6563996134272524 0.5577561064790129 0.4922130878257478  
0.5654425592705037 0.3510970961126614 0.4868136624724457  
0.5821430034663477 0.3715259942739864 0.5638055734713739  
0.6795768252443980 0.5435967368315523 0.4011870428877031  
0.7005949718789818 0.5679372352619797 0.4774100044579564  
0.5905497085465463 0.3109664718615086 0.4909068166817273  
0.6073445919100582 0.3314057096831353 0.5693582410471993  
0.6906624419062815 0.5354615986010889 0.3563587404599002  
0.7118599061955847 0.5610502621645010 0.4316273898509763  
0.7326929604677622 0.5844807594644706 0.5072968765524984  
0.5949185908509619 0.2821230717202122 0.4541809215300533  
0.6109624573335859 0.3011000436890477 0.5327482200209209  
0.6283601509239432 0.3216430663546726 0.6101906205203699  
0.5768006917927408 0.5549514811284667 0.5786189261252385  
0.3836943611718148 0.4818964938115332 0.6073069056208398  
0.3561095665082848 0.4412608758210838 0.4737219607498102  
0.4192161746785881 0.6023154357206829 0.4128962106636098  
0.4460950979336444 0.6427175954854024 0.5467423887012149  
0.2545472306158814 0.4221049080102223 0.5761292128151437  
0.3754953887758749 0.7336933423795311 0.4574807628539447  
0.6104749070195445 0.5193991392691455 0.3958140563995809  
0.6483510761413585 0.5590251951349283 0.5276361925690550  
0.5505378188541725 0.3613871167525002 0.4552921866432749  
0.5800165998607207 0.3967586397774215 0.5899522741894165  
0.7427151931767415 0.5754618964531246 0.4186366424983982  
0.6241659198291127 0.2675932777957619 0.5385008102595743  
0.3302796717448064 0.7192456136590611 0.4085897592271739  
0.2168849311401497 0.4276111434942840 0.5195941575958218  
0.4039538390845296 0.6321593241546010 0.3558041647731536  
0.3135000884793239 0.4006991583869424 0.4438013961078719  
0.5478383745536287 0.3068358960111691 0.4198238746359673  
0.7532685309845846 0.5350170989985713 0.3649277156477289  
0.6455410086545244 0.2509376409222208 0.4756439406156276

0.5973564770734612 0.3640082366715626 0.6460440216821278  
0.6688539549897061 0.2791999738822670 0.5866355165404000  
0.7833141845661811 0.5675562173062884 0.4733921191116870  
0.6927806039010536 0.6064780193989828 0.5513315311298005  
0.3590434017275167 0.4704388502093261 0.6675109209398812  
0.2395346554913918 0.4584498438235439 0.6298600977543858  
0.3540707885954801 0.7542747282948417 0.5176169937779547  
0.4482259811289138 0.6993267018189548 0.5803073342650141  
0.6314330743360793 0.5300956297282267 0.3343097738645043

**Re\*-Mo**

1.0000000000000000

30.0000000000000000 0.0000000000000000 0.0000000000000000  
0.0000000000000000 30.0000000000000000 0.0000000000000000  
0.0000000000000000 0.0000000000000000 30.0000000000000000

Re Mo O C Li H

1 1 26 36 1 28

**Direct**

0.5045941831870878 0.5113874421489616 0.5404358978957784  
0.4924407540916796 0.4917831983775221 0.4715346866182101  
0.3265488723721849 0.4727201320078664 0.6760815641813294  
0.2790356782743314 0.4020960313652748 0.4453986559145351  
0.3766985219257788 0.6524900743618879 0.3503167741138083  
0.4240486309830346 0.7226672098716801 0.5811803237148785  
0.2234531232719727 0.4095347336722662 0.4931886577374402  
0.4757637378014316 0.5735060352931353 0.5269224811144415  
0.4427941949056222 0.4882098339159634 0.5583126434823055  
0.3404718021582681 0.7097147129438004 0.3792246442447756  
0.3746399049086732 0.7600448461951896 0.5414469293725038  
0.4307019614710215 0.4679268467624823 0.4870324339761644  
0.4637114960994416 0.5513426829432770 0.4561914496531134  
0.2573191903665688 0.4575735754584561 0.6564807432074347  
0.5701389471798980 0.5358509370104987 0.5182034505000114  
0.5344576810374216 0.4485194106222671 0.5510042787796551  
0.5201483033704025 0.4304588537329693 0.4795357634920950  
0.5529345435901469 0.5140149298472011 0.4487720420358588  
0.7333987433364222 0.5364933849272997 0.3390900515601593  
0.7258325070398485 0.6001641292695579 0.5483042642857515  
0.7783365759284960 0.5878150544652311 0.4980905428678500  
0.5726052492058457 0.2849847532061065 0.4152777254038202  
0.6238582570989942 0.2465089838144139 0.4517248786837138  
0.6590887179560199 0.2869169155484728 0.6161649904819829  
0.6233186401431647 0.3421939991290688 0.6489838316605735  
0.6624427081634097 0.5249575749437065 0.3232383648058728  
0.5711016926105177 0.5222629926609740 0.6264639024468370  
0.5312951927035114 0.5269898724036225 0.6004325662584888  
0.2997190497828630 0.4612388234427690 0.6419061284523818

0.2677859691277499 0.4146377861705104 0.4871510649628033  
0.3702769617243091 0.6769888877630488 0.3875599805217627  
0.4021573186936962 0.7244501817748026 0.5419313879965370  
0.4596298502200066 0.5808603919387898 0.4878066527781312  
0.4168844807961798 0.4720280223603751 0.5280022130494045  
0.3575761551061953 0.4653557582067065 0.5843288643332681  
0.3421100390845644 0.4421693327279668 0.5077950687392810  
0.4160522110476355 0.6300529417791879 0.4368968680658773  
0.4313717345912151 0.6536903379177754 0.5133122881715815  
0.2834345292099347 0.4362994796609909 0.5649793248946794  
0.3871117766464136 0.7019580526571283 0.4640460341415984  
0.3133000069094282 0.4542957286348717 0.5975666882693287  
0.2974091482837953 0.4308038420789482 0.5196784501992961  
0.3909988892291875 0.6698017017935525 0.4290005698244890  
0.4068423948546904 0.6938664040519154 0.5067258747033474  
0.4358833011181932 0.6226799112062094 0.4786443887059636  
0.3714497254507620 0.4588403057238003 0.5401587674353262  
0.5811396703477437 0.5307003655421939 0.4768829765155265  
0.5374305105329474 0.4211493626611155 0.5184296706755285  
0.6259233045525747 0.5427223783596878 0.4613284455537906  
0.5617620050369245 0.3789390588200894 0.5236721311972387  
0.6368653010831704 0.5351594507196772 0.4165345951857548  
0.6580086009080267 0.5589270545998449 0.4914128501298858  
0.5656801319994199 0.3500420027896174 0.4871425452039110  
0.5826964259287606 0.3696136924560366 0.5643803456907307  
0.6807735500092009 0.5439857456701715 0.4005389362098948  
0.7022504769229749 0.5686728845481063 0.4766336176591183  
0.5909959941428814 0.3099354691744727 0.4908847921558183  
0.6080549834401100 0.3296729435133723 0.5695788950437685  
0.6916350497884050 0.5354717821449951 0.3557899837460354  
0.7133002335642025 0.5614067829348146 0.4308321562438185  
0.7342531398878405 0.5849975987786542 0.5067249936553995  
0.5954751371928236 0.2814315734323468 0.4539296596049957  
0.6116108108180901 0.2996546906133679 0.5326196753119723  
0.6292736806419928 0.3201297594913969 0.6103179113626708  
0.5830931176851316 0.5529237285955397 0.5777032676672272  
0.3812430152935112 0.4807562995174149 0.6072021717137004  
0.3539507229382568 0.4405172582692063 0.4734673397351304  
0.4183400287458358 0.6036194913433836 0.4120427274875401  
0.4453049012558160 0.6446783875548678 0.5456499461511239  
0.2522716892742700 0.4208318920994341 0.5758882099330688  
0.3744438697928879 0.7352321371797740 0.4562453991469760  
0.6114179281857645 0.5200080123723365 0.3954589879201976  
0.6499675246909643 0.5602288032567674 0.5268163467847820  
0.5508172882195685 0.3605810351414619 0.4556936326772393  
0.5806712802848695 0.3948235307443320 0.5905107007517268

|                    |                    |                    |
|--------------------|--------------------|--------------------|
| 0.7442110438494199 | 0.5755122028142310 | 0.4176723609046331 |
| 0.6245737999560756 | 0.2660199730414262 | 0.5381764914287609 |
| 0.3289379969234827 | 0.7204059098218346 | 0.4077333914766751 |
| 0.2147488429349191 | 0.4271288622141977 | 0.5191625427224084 |
| 0.4029449689414645 | 0.6337485339825611 | 0.3546145937347622 |
| 0.3114608584192332 | 0.3997427851816615 | 0.4437488874152581 |
| 0.5482342935704501 | 0.3061256442842514 | 0.4196663652981750 |
| 0.7542369897471811 | 0.5349569281403207 | 0.3640719952280678 |
| 0.6460440132456967 | 0.2501775987425538 | 0.4752439256658998 |
| 0.5981755716192273 | 0.3626878369847765 | 0.6458583256832353 |
| 0.6699313107353410 | 0.2779350766393001 | 0.5868115562698140 |
| 0.7849815975546789 | 0.5679237674642327 | 0.4731686865020518 |
| 0.6939868242828801 | 0.6063401606415638 | 0.5507797722433819 |
| 0.3575782455624429 | 0.4697015174516160 | 0.6666725585431025 |
| 0.2376434690082685 | 0.4581135624716785 | 0.6305665346669772 |
| 0.3529942606753267 | 0.7557220078646403 | 0.5175256632059928 |
| 0.4474278923530859 | 0.7001205754232681 | 0.5790436255214970 |
| 0.6322539377978219 | 0.5302788560562286 | 0.3342024374403147 |

#### Ru\*-Pd

1.0000000000000000

30.0000000000000000 0.0000000000000000 0.0000000000000000

0.0000000000000000 30.0000000000000000 0.0000000000000000

0.0000000000000000 0.0000000000000000 30.0000000000000000

Pd Ru O C H

1 1 24 36 28

#### Direct

0.4811026646049731 0.4922500752710893 0.4690823245015704

0.5085602063607954 0.5155980240887078 0.5477846508758394

0.3201299131306716 0.4700121876189390 0.6751389884549888

0.2875940811429335 0.3988724442527948 0.4425688420300244

0.3846956327116591 0.6501233831606392 0.3513947057677310

0.4250239332865140 0.7285486966498025 0.5803017215830604

0.2293632517755539 0.4037603924949787 0.4873099616225868

0.4782691305691318 0.5754023492732854 0.5310540993533952

0.4440282804642686 0.4891504973161758 0.5617246207494216

0.3488237110739776 0.7095605499296431 0.3758801585886044

0.3769831899782153 0.7646341221477440 0.5378446888364046

0.4308766328999281 0.4692164628557430 0.4893065865717081

0.4632198460999064 0.5530602241802020 0.4596498854550050

0.2523246871175739 0.4541407473606318 0.6514242590322732

0.5705280834531732 0.5379256569622746 0.5215238483224176

0.5364406429103576 0.4523317854412126 0.5539677918945852

0.5203276567123473 0.4327080979726032 0.4819933112752107

0.5517364809193045 0.5156350088762139 0.4510245469515354

0.7259828591382833 0.5360384060857118 0.3350217383376005

0.7267720416611957 0.6056492404284235 0.5427596031699088  
0.7769013090844343 0.5934078458454050 0.4902189417907700  
0.5655318248912863 0.2866209891683575 0.4183902126375810  
0.6157689769744441 0.2459193311895846 0.4536062096208860  
0.6583376677693255 0.2874168507547871 0.6168439438667471  
0.6259965018377267 0.3453220447100687 0.6487423624400425  
0.6545754971984358 0.5219440068061464 0.3239288400605722  
0.2954996842826886 0.4585879203229218 0.6393539331091731  
0.2736948033088284 0.4109371362862519 0.4835835736638165  
0.3770499255256661 0.6762936786061333 0.3871323706419055  
0.4039470663213341 0.7286592330570792 0.5406348351770074  
0.4619075424132946 0.5808769107682069 0.4926016852385244  
0.4199562862638512 0.4737459947849881 0.5308511940491888  
0.3568414496285477 0.4646567399142003 0.5849286272594041  
0.3458527330899447 0.4415674410503651 0.5080897890194495  
0.4192412387973543 0.6300807588579335 0.4401776117542939  
0.4328619032323538 0.6558306345060899 0.5157685325802788  
0.2845886171320634 0.4336395508523180 0.5618424018264406  
0.3909765402075586 0.7032112728369904 0.4636086405325078  
0.3120513975419487 0.4523562656691035 0.5958363838431787  
0.3009768119156084 0.4284964098947673 0.5175028278349774  
0.3954433316154710 0.6700297700523665 0.4298522599958409  
0.4090976093804068 0.6962660315593362 0.5070235597572843  
0.4378154861122709 0.6236478539196533 0.4824192346606168  
0.3731423404434959 0.4589835810220803 0.5416208379628563  
0.5787422099125185 0.5316453906287724 0.4807362631120682  
0.5379004141181359 0.4262272362794027 0.5208255209191067  
0.6242065325815485 0.5429255872454665 0.4626081297121265  
0.5625475550705086 0.3827670109854625 0.5252477379159564  
0.6337940058007741 0.5333772558516588 0.4180259029220181  
0.6568234423108272 0.5610194733228311 0.4905970625653530  
0.5649397231719345 0.3536054732463766 0.4889363560192742  
0.5842651039286114 0.3727654769191069 0.5652102851320044  
0.6766596927313475 0.5428619463485583 0.3996228736942936  
0.7003579602496138 0.5708177738583652 0.4736429252985275  
0.5884929356664638 0.3123139621206702 0.4924015905976348  
0.6085780318142876 0.3320394620475930 0.5700803115451795  
0.6853750654172095 0.5338639828508071 0.3544020574075599  
0.7097568932921831 0.5620406224293031 0.4278229818522543  
0.7334167229054339 0.5892740755179705 0.5014190880764290  
0.5898615862271698 0.2827214811484354 0.4559903079755966  
0.6099028098425486 0.3016264016118200 0.5335053261838906  
0.6302114850510874 0.3220460228580195 0.6105327047515248  
0.3790831504822176 0.4804063426098983 0.6090787866337931  
0.3596026431401814 0.4402187466132326 0.4744484044714530  
0.4222389140489325 0.6027226589611047 0.4164076867251215

0.4462080778735452 0.6478791184002045 0.5486991874413161  
 0.2528082352879695 0.4182434865453023 0.5710381620296617  
 0.3785077460867004 0.7363014103391233 0.4546045441263790  
 0.6077950089022079 0.5169233796519563 0.3987314049078530  
 0.6482844656975592 0.5653565362687395 0.5257074147246715  
 0.5497571219184231 0.3644948866719209 0.4577880683307451  
 0.5830662433140893 0.3980204784979481 0.5913920879100706  
 0.7403218904074892 0.5754510426932213 0.4130690744913664  
 0.6224160268409582 0.2677395663824372 0.5388324853891305  
 0.3364080302734138 0.7220484353776901 0.4032516416006439  
 0.2183616485940718 0.4208115106210294 0.5127544620509531  
 0.4092590215653249 0.6299470246075943 0.3583873764056199  
 0.3201376676144824 0.3987279510973105 0.4423137478178612  
 0.5427921242003330 0.3094183688377137 0.4231664842531782  
 0.7484425654475820 0.5356353288549474 0.3585636812728790  
 0.6393329972694977 0.2486627187690743 0.4758720544649571  
 0.6017844735146579 0.3667777045012238 0.6451081730966935  
 0.6678522965365862 0.2765747684940211 0.5876789765863083  
 0.7830320541658662 0.5731253742566936 0.4655083825649040  
 0.6947214147479491 0.6083602612199086 0.5477586971306384  
 0.3515984734498820 0.4677705674186736 0.6671029916675342  
 0.2339647537985074 0.4550662883247512 0.6245737349248645  
 0.3555776112422736 0.7596029522325340 0.5138571932635726  
 0.4482833711515887 0.7057896744315564 0.5795401918309879  
 0.6250521932897295 0.5261700824475806 0.3369841207088452

**Ru\*-Pt**

1.0000000000000000  
 30.0000000000000000 0.0000000000000000 0.0000000000000000  
 0.0000000000000000 30.0000000000000000 0.0000000000000000  
 0.0000000000000000 0.0000000000000000 30.0000000000000000

Pd Ru O C H  
 1 1 24 36 28

**Direct**

0.4911026646049731 0.4922500752710893 0.4690823245015704  
 0.5085602063607954 0.5155980240887078 0.5477846508758394  
 0.3201299131306716 0.4700121876189390 0.6751389884549888  
 0.2875940811429335 0.3988724442527948 0.4425688420300244  
 0.3846956327116591 0.6501233831606392 0.3513947057677310  
 0.4250239332865140 0.7285486966498025 0.5803017215830604  
 0.2293632517755539 0.4037603924949787 0.4873099616225868  
 0.4782691305691318 0.5754023492732854 0.5310540993533952  
 0.4440282804642686 0.4891504973161758 0.5617246207494216  
 0.3488237110739776 0.7095605499296431 0.3758801585886044  
 0.3769831899782153 0.7646341221477440 0.5378446888364046  
 0.4308766328999281 0.4692164628557430 0.4893065865717081

0.4632198460999064 0.5530602241802020 0.4596498854550050  
0.2523246871175739 0.4541407473606318 0.6514242590322732  
0.5705280834531732 0.5379256569622746 0.5215238483224176  
0.5364406429103576 0.4523317854412126 0.5539677918945852  
0.5203276567123473 0.4327080979726032 0.4819933112752107  
0.5517364809193045 0.5156350088762139 0.4510245469515354  
0.7259828591382833 0.5360384060857118 0.3350217383376005  
0.7267720416611957 0.6056492404284235 0.5427596031699088  
0.7769013090844343 0.5934078458454050 0.4902189417907700  
0.5655318248912863 0.2866209891683575 0.4183902126375810  
0.6157689769744441 0.2459193311895846 0.4536062096208860  
0.6583376677693255 0.2874168507547871 0.6168439438667471  
0.6259965018377267 0.3453220447100687 0.6487423624400425  
0.6545754971984358 0.5219440068061464 0.3239288400605722  
0.2954996842826886 0.4585879203229218 0.6393539331091731  
0.2736948033088284 0.4109371362862519 0.4835835736638165  
0.3770499255256661 0.6762936786061333 0.3871323706419055  
0.4039470663213341 0.7286592330570792 0.5406348351770074  
0.4619075424132946 0.5808769107682069 0.4926016852385244  
0.4199562862638512 0.4737459947849881 0.5308511940491888  
0.3568414496285477 0.4646567399142003 0.5849286272594041  
0.3458527330899447 0.4415674410503651 0.5080897890194495  
0.4192412387973543 0.6300807588579335 0.4401776117542939  
0.4328619032323538 0.6558306345060899 0.5157685325802788  
0.2845886171320634 0.4336395508523180 0.5618424018264406  
0.3909765402075586 0.7032112728369904 0.4636086405325078  
0.3120513975419487 0.4523562656691035 0.5958363838431787  
0.3009768119156084 0.4284964098947673 0.5175028278349774  
0.3954433316154710 0.6700297700523665 0.4298522599958409  
0.4090976093804068 0.6962660315593362 0.5070235597572843  
0.4378154861122709 0.6236478539196533 0.4824192346606168  
0.3731423404434959 0.4589835810220803 0.5416208379628563  
0.5787422099125185 0.5316453906287724 0.4807362631120682  
0.5379004141181359 0.4262272362794027 0.5208255209191067  
0.6242065325815485 0.5429255872454665 0.4626081297121265  
0.5625475550705086 0.3827670109854625 0.5252477379159564  
0.6337940058007741 0.5333772558516588 0.4180259029220181  
0.6568234423108272 0.5610194733228311 0.4905970625653530  
0.5649397231719345 0.3536054732463766 0.4889363560192742  
0.5842651039286114 0.3727654769191069 0.5652102851320044  
0.6766596927313475 0.5428619463485583 0.3996228736942936  
0.7003579602496138 0.5708177738583652 0.4736429252985275  
0.5884929356664638 0.3123139621206702 0.4924015905976348  
0.6085780318142876 0.3320394620475930 0.5700803115451795  
0.6853750654172095 0.5338639828508071 0.3544020574075599  
0.7097568932921831 0.5620406224293031 0.4278229818522543

0.7334167229054339 0.5892740755179705 0.5014190880764290  
 0.5898615862271698 0.2827214811484354 0.4559903079755966  
 0.6099028098425486 0.3016264016118200 0.5335053261838906  
 0.6302114850510874 0.3220460228580195 0.6105327047515248  
 0.3790831504822176 0.4804063426098983 0.6090787866337931  
 0.3596026431401814 0.4402187466132326 0.4744484044714530  
 0.4222389140489325 0.6027226589611047 0.4164076867251215  
 0.4462080778735452 0.6478791184002045 0.5486991874413161  
 0.2528082352879695 0.4182434865453023 0.5710381620296617  
 0.3785077460867004 0.7363014103391233 0.4546045441263790  
 0.6077950089022079 0.5169233796519563 0.3987314049078530  
 0.6482844656975592 0.5653565362687395 0.5257074147246715  
 0.5497571219184231 0.3644948866719209 0.4577880683307451  
 0.5830662433140893 0.3980204784979481 0.5913920879100706  
 0.7403218904074892 0.5754510426932213 0.4130690744913664  
 0.6224160268409582 0.2677395663824372 0.5388324853891305  
 0.3364080302734138 0.7220484353776901 0.4032516416006439  
 0.2183616485940718 0.4208115106210294 0.5127544620509531  
 0.4092590215653249 0.6299470246075943 0.3583873764056199  
 0.3201376676144824 0.3987279510973105 0.4423137478178612  
 0.5427921242003330 0.3094183688377137 0.4231664842531782  
 0.7484425654475820 0.5356353288549474 0.3585636812728790  
 0.6393329972694977 0.2486627187690743 0.4758720544649571  
 0.6017844735146579 0.3667777045012238 0.6451081730966935  
 0.6678522965365862 0.2765747684940211 0.5876789765863083  
 0.7830320541658662 0.5731253742566936 0.4655083825649040  
 0.6947214147479491 0.6083602612199086 0.5477586971306384  
 0.3515984734498820 0.4677705674186736 0.6671029916675342  
 0.2339647537985074 0.4550662883247512 0.6245737349248645  
 0.3555776112422736 0.7596029522325340 0.5138571932635726  
 0.4482833711515887 0.7057896744315564 0.5795401918309879  
 0.6250521932897295 0.5261700824475806 0.3369841207088452

**Nb\*-Mo**

1.0000000000000000  
 30.0000000000000000 0.0000000000000000 0.0000000000000000  
 0.0000000000000000 30.0000000000000000 0.0000000000000000  
 0.0000000000000000 0.0000000000000000 30.0000000000000000

Mo Nb O C Li H  
 1 1 26 36 1 28

**Direct**

0.4875790507043300 0.4877841928491357 0.4556976041504592  
 0.5057084115766677 0.5136698797628760 0.5445952036308325  
 0.3237193722649203 0.4689419756877172 0.6769462491616125  
 0.2837429123472194 0.3990139295658318 0.4450414262466307  
 0.3786154438943925 0.6609899625764698 0.3511717403974494



0.4265681509387655 0.7200238145648713 0.5846925730910976  
0.2266218456827112 0.4068135241705924 0.4910559145701355  
0.4754372486360354 0.5706962377511194 0.5227588922303973  
0.4446206224776117 0.4887420031946264 0.5597654251592112  
0.3433193655367734 0.7177246099404589 0.3823532308333056  
0.3774728979297839 0.7593491386176019 0.5463656903656474  
0.4317499780693133 0.4696645046032196 0.4886958132835825  
0.4596092197666100 0.5523797875733503 0.4511078613821892  
0.2549308895341285 0.4558542897825737 0.6540689776035359  
0.5674903443194914 0.5331310104226580 0.5156079407655414  
0.5342411290362420 0.4503879317599601 0.5456570463350545  
0.5190518820826766 0.4276783246566745 0.4750282318760124  
0.5489942056165391 0.5137390651263064 0.4459105747166072  
0.7350906220337479 0.5351366508518337 0.3404654390049802  
0.7186670842167515 0.6052908556259090 0.5470437236169116  
0.7730184865600090 0.5907148287075398 0.4994019298696240  
0.5723065781567661 0.2785193178764745 0.4198689471157986  
0.6237557920961841 0.2425801201453835 0.4585319006794191  
0.6587132885291715 0.2931589378963863 0.6202666834141460  
0.6217864125522008 0.3497292427877008 0.6496362219663101  
0.6646057953315205 0.5234019010332578 0.3222852234724618  
0.5795570998472505 0.5335246946840921 0.6179214677870745  
0.5370512146589727 0.5288401826967497 0.5969487136055497  
0.2980414707723540 0.4588718749181296 0.6414372380988518  
0.2710714391121481 0.4122172830425361 0.4861742781431220  
0.3720342959101433 0.6837473449192132 0.3894629110853400  
0.4044397565353520 0.7232788336994348 0.5456933227303604  
0.4577419842760050 0.5800892807494936 0.4840003463084782  
0.4176072060933507 0.4724806337227574 0.5297436082346956  
0.3577792509027239 0.4641518016365830 0.5856370683005614  
0.3441950758720688 0.4414787652775012 0.5084755388748795  
0.4153856988723564 0.6330354786266028 0.4369670642577403  
0.4316720783714042 0.6526592650107989 0.5142964356753998  
0.2842441264640106 0.4345702846692344 0.5641557504925724  
0.3887486131573357 0.7044605741554467 0.4672478577903044  
0.3132524941556329 0.4525437719924483 0.5975117434621124  
0.2995545981574178 0.4292434602945371 0.5193046701062577  
0.3918125903469201 0.6738724999079897 0.4307954880552363  
0.4082762271242884 0.6937905519321285 0.5094484500513421  
0.4351457482147288 0.6229886629555640 0.4782538634577645  
0.3728592834693394 0.4584584577480633 0.5415679257554042  
0.5784370842628695 0.5293773675987492 0.4734408493194893  
0.5370541701144363 0.4210415753953202 0.5135529263213667  
0.6228864731176714 0.5415969987330913 0.4587719715042064  
0.5619488426886637 0.3797565247118385 0.5217106763513233  
0.6361039874149421 0.5321478537996284 0.4147755922385136

0.6531671205360224 0.5609919574300197 0.4891719755153510  
0.5664896320565220 0.3486866143345576 0.4869505485975379  
0.5822983360061865 0.3722993996922712 0.5632434266721030  
0.6802898891266680 0.5420045532910285 0.4002024915883696  
0.6979765671364928 0.5702399633326235 0.4759885729090542  
0.5914882543453857 0.3087372414340704 0.4933085642631383  
0.6078292879110074 0.3328504127761424 0.5708204363058154  
0.6927921798157120 0.5336940569278532 0.3558252300900877  
0.7113972139442769 0.5607113525445774 0.4311940191945483  
0.7285575717119674 0.5885096767931112 0.5064459473805124  
0.5955997074524586 0.2777405656881483 0.4583851538502894  
0.6119766661957573 0.3008663012432992 0.5356431934872654  
0.6285038686701465 0.3256133240333555 0.6122696168737710  
0.6011598266740501 0.5131194638508128 0.5663962239447046  
0.3803321129369308 0.4800118029047753 0.6093304265490220  
0.3563099025082426 0.4405946037138131 0.4742125318457291  
0.4167307428544850 0.6076438067235940 0.4109798514788160  
0.4453946678871847 0.6421300459669066 0.5462740115163657  
0.2533092948215472 0.4182321077141345 0.5744080978253204  
0.3776674744782550 0.7386016377332867 0.4608727850219289  
0.6125133657044527 0.5147536710398672 0.3932773047465936  
0.6415835580872550 0.5693453815182319 0.5226454395154960  
0.5521751397029021 0.3573584013644470 0.4546808374233850  
0.5791408837767514 0.3981597701095557 0.5886162671536587  
0.7423617777719993 0.5752515482514712 0.4186435368546417  
0.6246210139402376 0.2675527879714628 0.5433137446769634  
0.3317248430436107 0.7272585985969006 0.4112576521216346  
0.2171000635056039 0.4250389056204829 0.5163292030317066  
0.4042702659142088 0.6413883638113270 0.3552270920946354  
0.3161430828491574 0.3959912510978459 0.4448543701348768  
0.5475248715254690 0.2993273185988299 0.4232988991559823  
0.7551215058492519 0.5332434895065742 0.3660848034691133  
0.6462839140223569 0.2478465804239388 0.4814464041946661  
0.5953254996296398 0.3682312772385662 0.6455991513335253  
0.6699192888861029 0.2826475868067703 0.5915436960577989  
0.7803482504116420 0.5697615803102759 0.4755389883607881  
0.6868963182041374 0.6121530374206445 0.5482891159273827  
0.3549060538739783 0.4644569749066794 0.6688107295031621  
0.2365366954350346 0.4579240433791993 0.6272543445186255  
0.3555052888012926 0.7558561374956815 0.5225737939137679  
0.4503674021777540 0.6980770809426212 0.5813892945148813  
0.6342890349815585 0.5301541765851392 0.3320190585400785

**Pt\*-Ir DMSC**

1.0000000000000000

30.0000000000000000 0.0000000000000000 0.0000000000000000  
0.0000000000000000 30.0000000000000000 0.0000000000000000

0.0000000000000000 0.0000000000000000 30.0000000000000000

Pt Ir O C Li H

1 1 26 36 1 28

Direct

|                    |                    |                    |
|--------------------|--------------------|--------------------|
| 0.5062551050234826 | 0.5111161167225375 | 0.5390606524843155 |
| 0.4905023956081005 | 0.4890832415794792 | 0.4620471948603221 |
| 0.3278861749403413 | 0.4733006816204021 | 0.6764604971691527 |
| 0.2810723427049279 | 0.4026937731094584 | 0.4457356627901781 |
| 0.3780549358368658 | 0.6513289240957245 | 0.3511994663206889 |
| 0.4248651073976442 | 0.7219112434606098 | 0.5819400225529759 |
| 0.2256738519680711 | 0.4098120496409542 | 0.4937843258882857 |
| 0.4774563584512362 | 0.5716973694353458 | 0.5259973316687820 |
| 0.4455716189597435 | 0.4878571289776218 | 0.5570500422088138 |
| 0.3419225923094938 | 0.7086747403896692 | 0.3800746336840222 |
| 0.3757141452557896 | 0.7588427755679370 | 0.5415045961574561 |
| 0.4297554309104969 | 0.4675810128000684 | 0.4849173532042811 |
| 0.4627072648674280 | 0.5509923520635066 | 0.4538277624293615 |
| 0.2589987761357532 | 0.4577877111070014 | 0.6559504314609983 |
| 0.5678783420648460 | 0.5354807803049563 | 0.5181654986153195 |
| 0.5347347929610633 | 0.4501553590974808 | 0.5491436340265171 |
| 0.5195427321695565 | 0.4292304313710068 | 0.4771768920651309 |
| 0.5526714748553522 | 0.5125610761840771 | 0.4472213628011103 |
| 0.7325214007293259 | 0.5368399452833102 | 0.3398987955784573 |
| 0.7245186462058366 | 0.5998563366283848 | 0.5488638086367439 |
| 0.7767207679531750 | 0.5875523233945830 | 0.4982485466725924 |
| 0.5719366903001296 | 0.2853585717119981 | 0.4156488324038205 |
| 0.6232036257120979 | 0.2471352714976298 | 0.4522555516266538 |
| 0.6579519160154081 | 0.2881740632833393 | 0.6159907502864038 |
| 0.6225663508460074 | 0.3436061957489522 | 0.6488876168390105 |
| 0.6617163943934362 | 0.5250402039016553 | 0.3235423812014432 |
| 0.5627079463396085 | 0.5171452620325308 | 0.6223867594895525 |
| 0.5235957474094203 | 0.5362890935570425 | 0.6045272989788506 |
| 0.3015776092262692 | 0.4619467661568419 | 0.6418705005891974 |
| 0.2699595726366681 | 0.4151932222173793 | 0.4875214922937485 |
| 0.3715296023456023 | 0.6757910234269642 | 0.3884157404995068 |
| 0.4030839707381952 | 0.7230871879079858 | 0.5426172922858601 |
| 0.4604843458559982 | 0.5782320612821006 | 0.4864035524571972 |
| 0.4193298264584853 | 0.4723929581131187 | 0.5258290995824028 |
| 0.3600663888043342 | 0.4665285382318304 | 0.5843458767054349 |
| 0.3442330540957905 | 0.4431205696801824 | 0.5080303662312804 |
| 0.4167613830282205 | 0.6286345460442680 | 0.4378433236285204 |
| 0.4321938324311179 | 0.6516709752038468 | 0.5143561375366542 |
| 0.2858577712893652 | 0.4372356324711362 | 0.5651570285050994 |
| 0.3881287472825403 | 0.7003582393423515 | 0.4651261141670155 |
| 0.3156762283883412 | 0.4553369230317675 | 0.5976112671626062 |
| 0.2996373016982157 | 0.4316276833512007 | 0.5199218559959812 |

0.3919194420857930 0.6684069549217952 0.4299958090422576  
0.4077684063323169 0.6920734414486628 0.5077480405637914  
0.4365812725436398 0.6209139793986224 0.4794706340960513  
0.3737275908691602 0.4598986639987629 0.5401771083428266  
0.5789924776072098 0.5290277114402300 0.4760098109877291  
0.5366133598501340 0.4226354251077177 0.5155854667396452  
0.6245055731315601 0.5414863727959832 0.4619740377598044  
0.5614405831223075 0.3804791598974738 0.5228986414336163  
0.6358110010220555 0.5343763114973624 0.4171218345554855  
0.6563996134272524 0.5577561064790129 0.4922130878257478  
0.5654425592705037 0.3510970961126614 0.4868136624724457  
0.5821430034663477 0.3715259942739864 0.5638055734713739  
0.6795768252443980 0.5435967368315523 0.4011870428877031  
0.7005949718789818 0.5679372352619797 0.4774100044579564  
0.5905497085465463 0.3109664718615086 0.4909068166817273  
0.6073445919100582 0.3314057096831353 0.5693582410471993  
0.6906624419062815 0.5354615986010889 0.3563587404599002  
0.7118599061955847 0.5610502621645010 0.4316273898509763  
0.7326929604677622 0.5844807594644706 0.5072968765524984  
0.5949185908509619 0.2821230717202122 0.4541809215300533  
0.6109624573335859 0.3011000436890477 0.5327482200209209  
0.6283601509239432 0.3216430663546726 0.6101906205203699  
0.5768006917927408 0.5549514811284667 0.5786189261252385  
0.3836943611718148 0.4818964938115332 0.6073069056208398  
0.3561095665082848 0.4412608758210838 0.4737219607498102  
0.4192161746785881 0.6023154357206829 0.4128962106636098  
0.4460950979336444 0.6427175954854024 0.5467423887012149  
0.2545472306158814 0.4221049080102223 0.5761292128151437  
0.3754953887758749 0.7336933423795311 0.4574807628539447  
0.6104749070195445 0.5193991392691455 0.3958140563995809  
0.6483510761413585 0.5590251951349283 0.5276361925690550  
0.5505378188541725 0.3613871167525002 0.4552921866432749  
0.5800165998607207 0.3967586397774215 0.5899522741894165  
0.7427151931767415 0.5754618964531246 0.4186366424983982  
0.6241659198291127 0.2675932777957619 0.5385008102595743  
0.3302796717448064 0.7192456136590611 0.4085897592271739  
0.2168849311401497 0.4276111434942840 0.5195941575958218  
0.4039538390845296 0.6321593241546010 0.3558041647731536  
0.3135000884793239 0.4006991583869424 0.4438013961078719  
0.5478383745536287 0.3068358960111691 0.4198238746359673  
0.7532685309845846 0.5350170989985713 0.3649277156477289  
0.6455410086545244 0.2509376409222208 0.4756439406156276  
0.5973564770734612 0.3640082366715626 0.6460440216821278  
0.6688539549897061 0.2791999738822670 0.5866355165404000  
0.7833141845661811 0.5675562173062884 0.4733921191116870  
0.6927806039010536 0.6064780193989828 0.5513315311298005

0.3590434017275167 0.4704388502093261 0.6675109209398812  
0.2395346554913918 0.4584498438235439 0.6298600977543858  
0.3540707885954801 0.7542747282948417 0.5176169937779547  
0.4482259811289138 0.6993267018189548 0.5803073342650141  
0.6314330743360793 0.5300956297282267 0.3343097738645043

**Mo\*-Pt DMSC**

1.0000000000000000

30.0000000000000000 0.0000000000000000 0.0000000000000000  
0.0000000000000000 30.0000000000000000 0.0000000000000000  
0.0000000000000000 0.0000000000000000 30.0000000000000000

Pt Mo O C Li H  
1 1 26 36 1 28

**Direct**

0.4905023956081005 0.4890832415794792 0.4620471948603221  
0.5062551050234826 0.5111161167225375 0.5390606524843155  
0.3278861749403413 0.4733006816204021 0.6764604971691527  
0.2810723427049279 0.4026937731094584 0.4457356627901781  
0.3780549358368658 0.6513289240957245 0.3511994663206889  
0.4248651073976442 0.7219112434606098 0.5819400225529759  
0.2256738519680711 0.4098120496409542 0.4937843258882857  
0.4774563584512362 0.5716973694353458 0.5259973316687820  
0.4455716189597435 0.4878571289776218 0.5570500422088138  
0.3419225923094938 0.7086747403896692 0.3800746336840222  
0.3757141452557896 0.7588427755679370 0.5415045961574561  
0.4297554309104969 0.4675810128000684 0.4849173532042811  
0.4627072648674280 0.5509923520635066 0.4538277624293615  
0.2589987761357532 0.4577877111070014 0.6559504314609983  
0.5678783420648460 0.5354807803049563 0.5181654986153195  
0.5347347929610633 0.4501553590974808 0.5491436340265171  
0.5195427321695565 0.4292304313710068 0.4771768920651309  
0.5526714748553522 0.5125610761840771 0.4472213628011103  
0.7325214007293259 0.5368399452833102 0.3398987955784573  
0.7245186462058366 0.5998563366283848 0.5488638086367439  
0.7767207679531750 0.5875523233945830 0.4982485466725924  
0.5719366903001296 0.2853585717119981 0.4156488324038205  
0.6232036257120979 0.2471352714976298 0.4522555516266538  
0.6579519160154081 0.2881740632833393 0.6159907502864038  
0.6225663508460074 0.3436061957489522 0.6488876168390105  
0.6617163943934362 0.5250402039016553 0.3235423812014432  
0.5627079463396085 0.5171452620325308 0.6223867594895525  
0.5235957474094203 0.5362890935570425 0.6045272989788506  
0.3015776092262692 0.4619467661568419 0.6418705005891974  
0.2699595726366681 0.4151932222173793 0.4875214922937485  
0.3715296023456023 0.6757910234269642 0.3884157404995068  
0.4030839707381952 0.7230871879079858 0.5426172922858601

0.4604843458559982 0.5782320612821006 0.4864035524571972  
0.4193298264584853 0.4723929581131187 0.5258290995824028  
0.3600663888043342 0.4665285382318304 0.5843458767054349  
0.3442330540957905 0.4431205696801824 0.5080303662312804  
0.4167613830282205 0.6286345460442680 0.4378433236285204  
0.4321938324311179 0.6516709752038468 0.5143561375366542  
0.2858577712893652 0.4372356324711362 0.5651570285050994  
0.3881287472825403 0.7003582393423515 0.4651261141670155  
0.3156762283883412 0.4553369230317675 0.5976112671626062  
0.2996373016982157 0.4316276833512007 0.5199218559959812  
0.3919194420857930 0.6684069549217952 0.4299958090422576  
0.4077684063323169 0.6920734414486628 0.5077480405637914  
0.4365812725436398 0.6209139793986224 0.4794706340960513  
0.3737275908691602 0.4598986639987629 0.5401771083428266  
0.5789924776072098 0.5290277114402300 0.4760098109877291  
0.5366133598501340 0.4226354251077177 0.5155854667396452  
0.6245055731315601 0.5414863727959832 0.4619740377598044  
0.5614405831223075 0.3804791598974738 0.5228986414336163  
0.6358110010220555 0.5343763114973624 0.4171218345554855  
0.6563996134272524 0.5577561064790129 0.4922130878257478  
0.5654425592705037 0.3510970961126614 0.4868136624724457  
0.5821430034663477 0.3715259942739864 0.5638055734713739  
0.6795768252443980 0.5435967368315523 0.4011870428877031  
0.7005949718789818 0.5679372352619797 0.4774100044579564  
0.5905497085465463 0.3109664718615086 0.4909068166817273  
0.6073445919100582 0.3314057096831353 0.5693582410471993  
0.6906624419062815 0.5354615986010889 0.3563587404599002  
0.7118599061955847 0.5610502621645010 0.4316273898509763  
0.7326929604677622 0.5844807594644706 0.5072968765524984  
0.5949185908509619 0.2821230717202122 0.4541809215300533  
0.6109624573335859 0.3011000436890477 0.5327482200209209  
0.6283601509239432 0.3216430663546726 0.6101906205203699  
0.5768006917927408 0.5549514811284667 0.5786189261252385  
0.3836943611718148 0.4818964938115332 0.6073069056208398  
0.3561095665082848 0.4412608758210838 0.4737219607498102  
0.4192161746785881 0.6023154357206829 0.4128962106636098  
0.4460950979336444 0.6427175954854024 0.5467423887012149  
0.2545472306158814 0.4221049080102223 0.5761292128151437  
0.3754953887758749 0.7336933423795311 0.4574807628539447  
0.6104749070195445 0.5193991392691455 0.3958140563995809  
0.6483510761413585 0.5590251951349283 0.5276361925690550  
0.5505378188541725 0.3613871167525002 0.4552921866432749  
0.5800165998607207 0.3967586397774215 0.5899522741894165  
0.7427151931767415 0.5754618964531246 0.4186366424983982  
0.6241659198291127 0.2675932777957619 0.5385008102595743  
0.3302796717448064 0.7192456136590611 0.4085897592271739

0.2168849311401497 0.4276111434942840 0.5195941575958218  
 0.4039538390845296 0.6321593241546010 0.3558041647731536  
 0.3135000884793239 0.4006991583869424 0.4438013961078719  
 0.5478383745536287 0.3068358960111691 0.4198238746359673  
 0.7532685309845846 0.5350170989985713 0.3649277156477289  
 0.6455410086545244 0.2509376409222208 0.4756439406156276  
 0.5973564770734612 0.3640082366715626 0.6460440216821278  
 0.6688539549897061 0.2791999738822670 0.5866355165404000  
 0.7833141845661811 0.5675562173062884 0.4733921191116870  
 0.6927806039010536 0.6064780193989828 0.5513315311298005  
 0.3590434017275167 0.4704388502093261 0.6675109209398812  
 0.2395346554913918 0.4584498438235439 0.6298600977543858  
 0.3540707885954801 0.7542747282948417 0.5176169937779547  
 0.4482259811289138 0.6993267018189548 0.5803073342650141  
 0.6314330743360793 0.5300956297282267 0.3343097738645043

**Fe\*-Cu**

1.0000000000000000  
 30.0000000000000000 0.0000000000000000 0.0000000000000000  
 0.0000000000000000 30.0000000000000000 0.0000000000000000  
 0.0000000000000000 0.0000000000000000 30.0000000000000000

Cu Fe O C Li H  
 1 1 26 36 1 28

**Direct**

0.4909797775256707 0.4902719803465005 0.4660870890735513  
 0.5053279580753521 0.5121333093563351 0.5515476395737062  
 0.3266634493731381 0.4726050864122561 0.6761078762872096  
 0.2796267090866495 0.4019864992839366 0.4457773826668293  
 0.3787248469243990 0.6508043318318411 0.3513052980439972  
 0.4259419331428330 0.7203493884985807 0.5819569257872915  
 0.2238827863698831 0.4089355445311442 0.4933410360994397  
 0.4779210083801376 0.5694336727125687 0.5250564675193520  
 0.4430719352468742 0.4870631561918934 0.5589988110122438  
 0.3425124288062157 0.7081460094777212 0.3799066204259943  
 0.3766684091103530 0.7575692216155390 0.5420882487981616  
 0.4293943391239117 0.4674419724961312 0.4870537994989186  
 0.4634836682861245 0.5497693371341469 0.4534658388363478  
 0.2573084970998738 0.4577199171851040 0.6569318717582158  
 0.5709705264173986 0.5369001037344449 0.5193243576717878  
 0.5334652017913026 0.4508154181561728 0.5473427716899142  
 0.5187258654425017 0.4303120900285148 0.4761029257907960  
 0.5536042094473786 0.5144163785845612 0.4496013536139002  
 0.7329867448432468 0.5369807615886655 0.3385864079429743  
 0.7260310608510708 0.6000901292865594 0.5481567644736738  
 0.7789057003620466 0.5881425946333888 0.4981357162926065  
 0.5722872404074129 0.2847657153827299 0.4149261429710576

0.6226333738663272 0.2464536578249126 0.4524809279427357  
0.6569668258612682 0.2899678318320073 0.6166156658266336  
0.6209612757977231 0.3460215147196395 0.6475630333075553  
0.6619392155179097 0.5253259139677017 0.3233926583864590  
0.5637555904893361 0.5231772663327819 0.6254069850464415  
0.5244510081191571 0.5395055311961288 0.6050417456760050  
0.2996385445319316 0.4613946656165872 0.6421173269076530  
0.2681646448308818 0.4145197281702754 0.4873942306263054  
0.3719617897506741 0.6751986013022805 0.3884224701277687  
0.4039688119715232 0.7217744912777125 0.5428391499665759  
0.4613112535679941 0.5765233730517416 0.4863152104462825  
0.4181973412159564 0.4719682981367190 0.5275715918132546  
0.3577020197348984 0.4655588914103646 0.5845076918378970  
0.3424087414666422 0.4425778963505110 0.5083298487666884  
0.4170372435376122 0.6276628619773085 0.4378106780712347  
0.4328032353583512 0.6503539805730443 0.5140302506651644  
0.2836227057792775 0.4367865485837180 0.5650678898251374  
0.3886241409208231 0.6993026707937683 0.4653137871069968  
0.3132628649261065 0.4546675887272401 0.5976899976875252  
0.2976378881730401 0.4311212685558660 0.5199559617491833  
0.3922351096751786 0.6675818847639975 0.4300630517627455  
0.4083739603449923 0.6908473263742285 0.5077953314476563  
0.4370039043559738 0.6197069930505668 0.4791561894679346  
0.3716423000351672 0.4591105275320146 0.5405808085103686  
0.5803872650468392 0.5303928362891145 0.4779159974746553  
0.5357863840430338 0.4237208618782750 0.5143357976516191  
0.6264059126578597 0.5422326846155754 0.4619737022643911  
0.5611371424556787 0.3811643713666971 0.5212252485320934  
0.6370956351040220 0.5347141975392596 0.4172429316140573  
0.6586312645126530 0.5584923578550606 0.4914925454635949  
0.5655908145941974 0.3516946451818145 0.4853952825031245  
0.5815902480594712 0.3722835261554710 0.5621723610797055  
0.6808808378832665 0.5437913634017730 0.4007252474170631  
0.7028057763978262 0.5684091910789850 0.4765390751454832  
0.5905275650629811 0.3113432697789512 0.4899765413356528  
0.6068363876250366 0.3322923362849706 0.5683235518976238  
0.6914114408052967 0.5356598649483003 0.3557279863460364  
0.7134965081380944 0.5612320413714609 0.4307207910349409  
0.7347402232253716 0.5850106759857764 0.5066010794020476  
0.5948689186593268 0.2818766462083679 0.4536678734431614  
0.6105588512175941 0.3017210012380663 0.5320280552276568  
0.6274254816218473 0.3232506227667716 0.6095660180529688  
0.5805344016393271 0.5546287775676720 0.5770471738190632  
0.3816984634528416 0.4806285637682362 0.6073453652067795  
0.3547551791192518 0.4406577021511071 0.4741728893311407  
0.4196775595760934 0.6012723105402666 0.4129325229525009



|                    |                    |                    |
|--------------------|--------------------|--------------------|
| 0.4471295431260083 | 0.6410443309432146 | 0.5461686482181826 |
| 0.2518367083321396 | 0.4224418295846002 | 0.5757316119510332 |
| 0.3754937461573007 | 0.7325361843025882 | 0.4580379193670576 |
| 0.6112340041449068 | 0.5198257257197447 | 0.3964427263995456 |
| 0.6503521610265418 | 0.5604185813220851 | 0.5268377774746072 |
| 0.5509190451579163 | 0.3618852545709718 | 0.4537344975910154 |
| 0.5790306070263149 | 0.3978433599251225 | 0.5880020627178335 |
| 0.7446719831791977 | 0.5747381435139207 | 0.4175222198880097 |
| 0.6240307719416319 | 0.2683851305147713 | 0.5380430586242890 |
| 0.3310045432125109 | 0.7190507815638364 | 0.4083381730284383 |
| 0.2148311824704489 | 0.4265821575896513 | 0.5191479275974626 |
| 0.4040117195093099 | 0.6309300431881966 | 0.3564161199395626 |
| 0.3121117408410053 | 0.4006007206307388 | 0.4438853085468829 |
| 0.5480196489093917 | 0.3061733707692240 | 0.4185582774584488 |
| 0.7541590191180069 | 0.5354102728708544 | 0.3632448825832402 |
| 0.6450700227922178 | 0.2502747079872672 | 0.4757482064699001 |
| 0.5961053149477226 | 0.3666294619964098 | 0.6435551009789934 |
| 0.6677786976983139 | 0.2796428535307164 | 0.5876423656619179 |
| 0.7858732432979439 | 0.5682079213025935 | 0.4733412257246889 |
| 0.6942198181547308 | 0.6065194027387553 | 0.5502492316491130 |
| 0.3575711829492393 | 0.4706446810772615 | 0.6660176813583433 |
| 0.2373827341333876 | 0.4579765698459181 | 0.6311984696129418 |
| 0.3550493980524360 | 0.7533848095786433 | 0.5181060066659777 |
| 0.4488494327291865 | 0.6972910507427744 | 0.5802962835220403 |
| 0.6318230276517353 | 0.5299328839616425 | 0.3349001297749679 |

### Ti\*-Fe

|                     |                     |                     |    |    |    |
|---------------------|---------------------|---------------------|----|----|----|
| 1.0000000000000000  |                     |                     |    |    |    |
| 30.0000000000000000 | 0.0000000000000000  | 0.0000000000000000  |    |    |    |
| 0.0000000000000000  | 30.0000000000000000 | 0.0000000000000000  |    |    |    |
| 0.0000000000000000  | 0.0000000000000000  | 30.0000000000000000 |    |    |    |
| Fe                  | Ti                  | O                   | C  | Li | H  |
| 1                   | 1                   | 26                  | 36 | 1  | 28 |

### Direct

|                    |                    |                    |
|--------------------|--------------------|--------------------|
| 0.4934977652409240 | 0.4931228571282997 | 0.4767908647973430 |
| 0.5053169064253554 | 0.5112308352730972 | 0.5414113404428176 |
| 0.3280250417332264 | 0.4729883040325670 | 0.6752489242122530 |
| 0.2803934534746703 | 0.4022620113311290 | 0.4449105511872216 |
| 0.3777427055625941 | 0.6510693272265196 | 0.3502896572687309 |
| 0.4250371075631989 | 0.7213040632047116 | 0.5808324257590953 |
| 0.2253024503271059 | 0.4095810828491601 | 0.4932076032068896 |
| 0.4782618417036810 | 0.5737382859324445 | 0.5284731842406527 |
| 0.4440762136568079 | 0.4888366539710330 | 0.5600696225215196 |
| 0.3420496807558271 | 0.7082933625888128 | 0.3797235848263220 |
| 0.3756306713250177 | 0.7583899517425149 | 0.5408569103934923 |
| 0.4344987829159423 | 0.4697697512777728 | 0.4883389268891457 |

0.4657152477142929 0.5484485105944590 0.4591746216628165  
0.2588256545617577 0.4576498523644140 0.6556185333433713  
0.5700059392518186 0.5368975402536118 0.5203033500559132  
0.5355398973467148 0.4500966058420727 0.5522513751773536  
0.5188456592277727 0.4344043169814181 0.4810094080925875  
0.5500644141682325 0.5130067162218364 0.4526527936200392  
0.7319912941484715 0.5365992943385968 0.3395727107278304  
0.7240527673617776 0.5994530804526647 0.5481869967245863  
0.7764957349579419 0.5874439362287434 0.4977431709187616  
0.5716000642354796 0.2854510079850035 0.4148522190345874  
0.6226248779048046 0.2474596212161239 0.4518979323255785  
0.6578000920673184 0.2879923019642802 0.6152924300528854  
0.6219809709211114 0.3432076699038477 0.6481112794865006  
0.6613485308716286 0.5245227073981419 0.3228539185350945  
0.5667808866537147 0.5206886314531917 0.6256660583899621  
0.5276711368624446 0.5320320908214908 0.6024511025507709  
0.3012504912868786 0.4615770351784980 0.6410827356527347  
0.2695565075424327 0.4150334514673895 0.4866296091869153  
0.3714656237758208 0.6750984520679770 0.3877733802218959  
0.4030938806706992 0.7227210945615953 0.5416769485208275  
0.4618164322560653 0.5787075654606095 0.4891853750642021  
0.4197463072831840 0.4732536004121880 0.5283650480017801  
0.3592491442616131 0.4660227410439243 0.5835128450967105  
0.3442711170484883 0.4431255837348379 0.5070695374885477  
0.4171497523955773 0.6275357176283176 0.4373755897953552  
0.4324342174766958 0.6517002662019440 0.5134014332513751  
0.2853719964164180 0.4369482852790804 0.5640293588760905  
0.3880605650799253 0.6995395273443031 0.4641448914599677  
0.3149704236197900 0.4548880719047318 0.5966793994253666  
0.2994607947568455 0.4315597495003272 0.5188427800987331  
0.3920567718359020 0.6673406395703733 0.4292572397979266  
0.4077250428699613 0.6917672904447538 0.5067354916199500  
0.4371100844589446 0.6204706282044956 0.4790534900003219  
0.3734526022174051 0.4597287770302944 0.5395050791260365  
0.5790833379942867 0.5300121574393888 0.4787431407965023  
0.5370587935036956 0.4240339348884052 0.5184307904351979  
0.6240546437140128 0.5415001267055431 0.4616632051534533  
0.5613268245628007 0.3810161764112120 0.5226481302330203  
0.6348063906905086 0.5338571810487004 0.4168475618416365  
0.6562676646819621 0.5579412774643827 0.4913414357775777  
0.5650561705359861 0.3521302738897166 0.4861968721168268  
0.5821415484965314 0.3713215159807459 0.5632966357564448  
0.6786969191489716 0.5430506005149115 0.4006484866816200  
0.7003780708858585 0.5678810776085808 0.4765657945403491  
0.5901054477755607 0.3117336833064211 0.4900044986212141  
0.6072133704897130 0.3312580403851395 0.5685621333110961

0.6900201297573799 0.5349645672960776 0.3558583673089988  
0.7112016428031914 0.5606484781122298 0.4307872456941423  
0.7324057532489816 0.5843739546367525 0.5065589487936057  
0.5944718186929319 0.2826221385349443 0.4534361044127105  
0.6106238106405182 0.3013916560683892 0.5316754262716551  
0.6281157914964275 0.3213540885109696 0.6094441349339556  
0.5790708402545047 0.5556843300690311 0.5785058148596063  
0.3829463720695913 0.4812910726986662 0.6064854552398808  
0.3562106661972587 0.4412544086967574 0.4727473237874536  
0.4197236002215592 0.6010333742663929 0.4125620132715483  
0.4466472910758944 0.6429269225424140 0.5457181583629572  
0.2539719453806331 0.4218406493319282 0.5747778847958054  
0.3749394392473464 0.7326601780520211 0.4563344461330153  
0.6092866809441083 0.5188495379084267 0.3957046745790258  
0.6479944676509509 0.5598307102665605 0.5266822389765233  
0.5499274141532046 0.3625481797304769 0.4547630378791819  
0.5798543496810361 0.3963894367864714 0.5896191813078595  
0.7422406284674860 0.5744938327625679 0.4175978864815320  
0.6238358724206222 0.2678435747832060 0.5371264376696893  
0.3304049467855130 0.7187483054704555 0.4082945979932114  
0.2166140791104437 0.4273890096193562 0.5190467313588384  
0.4036456563321578 0.6318604573331152 0.3543652637254747  
0.3127866691873897 0.4002934350784910 0.4426787386292022  
0.5475132696362965 0.3070147383418550 0.4186153087369134  
0.7527007252014217 0.5347939327556230 0.3646440349774058  
0.6450053834820083 0.2512958306104961 0.4751928892140384  
0.5969472187237628 0.3637744288270672 0.6449203270265005  
0.6688903555512089 0.2791238267391624 0.5859655876329763  
0.7832684525486175 0.5674003005646066 0.4729922467043758  
0.6922747779816050 0.6058248009688245 0.5506427388283766  
0.3590338547033494 0.4704827794008409 0.6656396662289938  
0.2391243789298342 0.4581535434437701 0.6297071758604766  
0.3539291239816995 0.7539671129414932 0.5170142605699645  
0.4479595813000055 0.6982514615810108 0.5790194535430370  
0.6309959288688674 0.5295320603461223 0.3333735626172928

**Rh\*-Re**

1.0000000000000000

30.0000000000000000 0.0000000000000000 0.0000000000000000  
0.0000000000000000 30.0000000000000000 0.0000000000000000  
0.0000000000000000 0.0000000000000000 30.0000000000000000

Re Rh O C Li H

1 1 26 36 1 28

**Direct**

0.4909370125354268 0.4898308137913112 0.4645747669662947  
0.5064720168970008 0.5113456179676291 0.5394189066358734

0.3275689937358399 0.4730451803882171 0.6764250851156810  
0.2808649355369558 0.4027729133167668 0.4456893777457299  
0.3775009440649255 0.6516930433200933 0.3509010832408077  
0.4246008012037173 0.7221339972420276 0.5814871398552344  
0.2254024439715681 0.4097655030361607 0.4936188756621597  
0.4780219405045518 0.5726240710562551 0.5260287187290124  
0.4450852382440957 0.4887033626153793 0.5574252540270953  
0.3414185398238323 0.7090226679990732 0.3796757374445873  
0.3753288773543015 0.7593432647424652 0.5415022582929042  
0.4301329632852712 0.4677242192137064 0.4858556253017532  
0.4627418182052188 0.5510246409141857 0.4548200483546772  
0.2585740379262659 0.4575924238549596 0.6563246481628260  
0.5688223251874996 0.5352811855820687 0.5179793866152314  
0.5351909671205154 0.4502385869524862 0.5497137874226411  
0.5195686162180139 0.4295798128177137 0.4783046095133061  
0.5528571297558322 0.5129445241233762 0.4476492031243596  
0.7328956947147951 0.5365569845614764 0.3394608733298670  
0.7250175037330376 0.5999224556041756 0.5486142718307024  
0.7773314802081894 0.5877027494145221 0.4981882733710246  
0.5719447447510503 0.2856836291575347 0.4156414848668787  
0.6233013445211378 0.2472730691062564 0.4519093639653304  
0.6586184637012272 0.2873392627492473 0.6158666750247782  
0.6229091386945266 0.3423574723267580 0.6490513206353802  
0.6620111864343279 0.5248182901282389 0.3234242176685462  
0.5629721469430450 0.5174306654872214 0.6219561603726563  
0.5218255965096339 0.5305595400295575 0.6045221432064697  
0.3010887907338090 0.4616729350248501 0.6420230305259934  
0.2697146421285919 0.4151885353541664 0.4874690138945016  
0.3710406302810974 0.6761301457075605 0.3881160946903828  
0.4027556033697088 0.7236282264644783 0.5422479660451238  
0.4607659621081373 0.5789770467656229 0.4871307707289506  
0.4192909710989352 0.4728302385692922 0.5269195874684587  
0.3594998122128401 0.4663607663648309 0.5845527025433845  
0.3440516592251865 0.4430660485272194 0.5082808048997595  
0.4166017824192164 0.6290664219185067 0.4376255794370981  
0.4320740398412391 0.6524557083553501 0.5138622817370013  
0.2853950471518665 0.4370374959605183 0.5651600092946210  
0.3877037144674430 0.7008548124836954 0.4646830718524985  
0.3150860484881625 0.4551004702006189 0.5977130029523662  
0.2993377501335640 0.4315463302224607 0.5199676388783450  
0.3915784635293232 0.6688134931145568 0.4296457340657784  
0.4074277805426067 0.6927429723512397 0.5072623964844140  
0.4365379800889920 0.6215380849488172 0.4792017114086453  
0.3733921179216472 0.4598426175330969 0.5404976106907972  
0.5796103068551840 0.5293298000316595 0.4762803761722288  
0.5369926526407945 0.4227762583864963 0.5168252910364944

0.6250773819302023 0.5417869641099087 0.4616313778585338  
0.5616938438816597 0.3802594120534438 0.5235197159221621  
0.6362781902262841 0.5346211497328914 0.4168368526961351  
0.6569456471785134 0.5581356190052620 0.4917798001776407  
0.5653785813244335 0.3509614700532461 0.4873750771492489  
0.5826526302985232 0.3710082015140371 0.5641929169590948  
0.6800968512750966 0.5437382007579052 0.4008645834448497  
0.7012060384665214 0.5682228750541033 0.4770383608697665  
0.5905911538400216 0.3107932493653611 0.4910687233975881  
0.6077782035740087 0.3307573451412940 0.5694813542091344  
0.6910766577933990 0.5353803267766511 0.3560693200955913  
0.7124355701275754 0.5611477378098383 0.4312655816670071  
0.7332532836115198 0.5846794894326768 0.5070376426628114  
0.5949528709862164 0.2822044092103577 0.4541327431150763  
0.6112124632508371 0.3006467150773866 0.5327325474890496  
0.6288845172125545 0.3207462776974829 0.6102259413151061  
0.5740765433525149 0.5547335548821936 0.5767132316504502  
0.3831154781621683 0.4817669243278486 0.6075195256056184  
0.3560511951872576 0.4411717623831920 0.4740061874179676  
0.4191216223538042 0.6026382173466482 0.4127604869813014  
0.4460762033247761 0.6434931060736209 0.5462062545196794  
0.2539921706198673 0.4219710942522008 0.5759806022581394  
0.3746399325253651 0.7340232918863858 0.4570369831350330  
0.6108273281985636 0.5196845509302722 0.3955978970555545  
0.6486678367360246 0.5596329058194477 0.5271455590867788  
0.5500666741917728 0.3612314345551549 0.4560570945212533  
0.5807104656511638 0.3961539263204783 0.5904350811130415  
0.7435167243310287 0.5750866557302640 0.4183086488086759  
0.6244971145705052 0.2671290368274379 0.5382824829527024  
0.3296090514744375 0.7196360656559722 0.4081001133133593  
0.2164888941591704 0.4275585353460077 0.5193874260246930  
0.4034428409082372 0.6325775926819163 0.3554026790570480  
0.3133007494516872 0.4008615171907585 0.4437537097917088  
0.5480200414001507 0.3073569361022003 0.4198262673016729  
0.7537194122176177 0.5348185103759139 0.3644408712158450  
0.6456111088817408 0.2508930973332897 0.4753501769115526  
0.5975131651567263 0.3625232384753025 0.6462942489194721  
0.6697371476467867 0.2785330655202242 0.5865499447797613  
0.7840546460813500 0.5677612613478589 0.4733194831148090  
0.6932248134175508 0.6062057769647503 0.5511725408738167  
0.3586601490284999 0.4704886745511097 0.6671525562960079  
0.2389451472584762 0.4581773689387504 0.6303616913211140  
0.3536014780395254 0.7549872002964255 0.5176452670171623  
0.4477335882969577 0.6993364932373928 0.5795992303851795  
0.6317915787787350 0.5298124144045602 0.3344050270531761

Ta\*-Ta

1.0000000000000000  
30.0000000000000000 0.0000000000000000 0.0000000000000000  
0.0000000000000000 30.0000000000000000 0.0000000000000000  
0.0000000000000000 0.0000000000000000 30.0000000000000000

Ta O C Li H  
2 26 36 1 28

Direct

0.5061716119006694 0.5161813010319528 0.5488480412357478  
0.4833456570772185 0.4938586436268032 0.4739302419660987  
0.3228002959839556 0.4707627711451723 0.6747889899866434  
0.2907241662440481 0.3993902284040403 0.4422006755423985  
0.3851425514210391 0.6459962799798328 0.3511250898400381  
0.4249618242354564 0.7274564621247642 0.5792405920896136  
0.2323191741264187 0.4047277468409287 0.4867471830712140  
0.4786710371250057 0.5751067595635332 0.5325767893670600  
0.4460955958429696 0.4896117670252924 0.5630517565876476  
0.3480259058421394 0.7048866960648400 0.3752007734142099  
0.3770142834798256 0.7629178674090416 0.5361969361761615  
0.4352980048819778 0.4712811381509485 0.4905432894757834  
0.4653563111383889 0.5501502407838407 0.4625095057536268  
0.2549383234980236 0.4555913700213829 0.6507279063628785  
0.5712564747472293 0.5353218647922040 0.5254494385540378  
0.5408825146594315 0.4546976118379527 0.5547570273227799  
0.5184446445562685 0.4368367002013933 0.4850891349880217  
0.5487270421520437 0.5166943114688244 0.4559741253577374  
0.7234215823864371 0.5361070332679169 0.3367600984387942  
0.7261877726068355 0.6026603837489924 0.5456581496920168  
0.7760511812521631 0.5898784215827242 0.4929555384161725  
0.5609984170451662 0.2898210419125514 0.4160009603159965  
0.6125900745969290 0.2487911809685757 0.4488230141587853  
0.6596859553115230 0.2866252448369172 0.6115491766418976  
0.6272930862446693 0.3427858407261040 0.6464238561168496  
0.6517535271026603 0.5235740981452017 0.3254019028176776  
0.5625966216486642 0.5233383848540374 0.6280467274192972  
0.5217869204994000 0.5325116097099055 0.6117350927839762  
0.2981840760455783 0.4597734365713613 0.6389036289369524  
0.2766447984107757 0.4118919009142756 0.4830495167947458  
0.3769632055646840 0.6723269885848624 0.3866683964409074  
0.4040676784102146 0.7270746294085850 0.5395038599510968  
0.4626679994214158 0.5797702385007505 0.4936342555188364  
0.4222640031076945 0.4744952537321033 0.5314447081250721  
0.3594658567473163 0.4655547008074957 0.5847216838928504  
0.3487433710301102 0.4425311879968840 0.5076237810104027  
0.4200029079265044 0.6273597773869704 0.4400690267996152  
0.4334623528266884 0.6543623796258728 0.5154143540379369

0.2872024221737457 0.4350038749625553 0.5612152525629663  
0.3908750182271761 0.7004946699451094 0.4627416542532874  
0.3146535870478315 0.4535155274125115 0.5953957006284057  
0.3037862182872151 0.4296912938128550 0.5169201998262292  
0.3956145949640639 0.6668717849825173 0.4293790433377550  
0.4093103387437170 0.6943875169705463 0.5062104209082976  
0.4386635633915033 0.6218422942950245 0.4824432594156868  
0.3758303609424757 0.4597519610729213 0.5414830540049604  
0.5781836623085255 0.5311426114733658 0.4833460666107276  
0.5390175646926589 0.4277911555297327 0.5214019687176699  
0.6226270922563631 0.5429254331296740 0.4648420696766871  
0.5620668569558430 0.3840788314680163 0.5246798474619635  
0.6315589311205781 0.5339228904555499 0.4199096304679808  
0.6555530392889983 0.5607966763164713 0.4927368704356205  
0.5630660679365028 0.3556217804046433 0.4876674727212073  
0.5840993833924616 0.3727669897643544 0.5642601269393752  
0.6743865711352084 0.5432515223994940 0.4013698569911339  
0.6990842624010752 0.5701448217618866 0.4757010974035938  
0.5862354902636132 0.3140734157224033 0.4898024683059243  
0.6081975475422263 0.3318261109499065 0.5676902136671920  
0.6827749837427053 0.5345794353412978 0.3560775844126887  
0.7080624265047301 0.5616370043115915 0.4296522879050498  
0.7324290466570648 0.5871874575730693 0.5038792504670725  
0.5865459528453087 0.2853300403386518 0.4527633844739002  
0.6087128400412913 0.3023874916378093 0.5301955482979250  
0.6307652831464964 0.3208981932564175 0.6072902828238249  
0.5830547919505010 0.4979492089664877 0.5755440421995985  
0.3817223175763518 0.4812824980960873 0.6088340502994638  
0.3625117112388786 0.4412898493482100 0.4739814969395807  
0.4230209965872255 0.5996632079711253 0.4166981672453130  
0.4468559414972792 0.6468272098511841 0.5483962462879948  
0.2554962231533027 0.4194723697126425 0.5703130640596283  
0.3781348142644446 0.7333017052139379 0.4531941545540735  
0.6053434466886010 0.5177582697296915 0.4005841924981514  
0.6473030801395505 0.5659895542893640 0.5277782287777080  
0.5473561040122511 0.3672976857269726 0.4570233534544218  
0.5830608841098976 0.3966803765416482 0.5916444615067405  
0.7384695385762039 0.5750971576182320 0.4147331737613499  
0.6207198129651442 0.2682542785571216 0.5346028030997272  
0.3352686627152967 0.7172241262973967 0.4024861981928286  
0.2212052946176433 0.4223847230232270 0.5117267788621228  
0.4105299912679940 0.6268764343899104 0.3581088107449525  
0.3232543263756207 0.3985961602964727 0.4423126521752028  
0.5378334068256881 0.3118297873948927 0.4221419406176373  
0.7459274286620139 0.5346955813149417 0.3602284939533490  
0.6369193642676747 0.2513013336601420 0.4703031262539683

0.6014324644551289 0.3624789744864180 0.6452674172353046  
0.6688394053152976 0.2773333960806844 0.5817180993504868  
0.7813426898923570 0.5700634746700411 0.4676604968689607  
0.6944399121209559 0.6080264155537298 0.5502781538189272  
0.3543249930837596 0.4687514736041843 0.6669231544527799  
0.2368544601405300 0.4568815809109983 0.6236912169305985  
0.3558398239521592 0.7575145174823616 0.5120794177068726  
0.4482023845088167 0.7046678668782929 0.5791232177202600  
0.6222984957658259 0.5291319338237040 0.3380739925133004

**Re\*-Rh**

1.0000000000000000

30.0000000000000000 0.0000000000000000 0.0000000000000000  
0.0000000000000000 30.0000000000000000 0.0000000000000000  
0.0000000000000000 0.0000000000000000 30.0000000000000000

Re Rh O C Li H

1 1 26 36 1 28

**Direct**

0.5064720168970008 0.5113456179676291 0.5394189066358734  
0.4909370125354268 0.4898308137913112 0.4645747669662947  
0.3275689937358399 0.4730451803882171 0.6764250851156810  
0.2808649355369558 0.4027729133167668 0.4456893777457299  
0.3775009440649255 0.6516930433200933 0.3509010832408077  
0.4246008012037173 0.7221339972420276 0.5814871398552344  
0.2254024439715681 0.4097655030361607 0.4936188756621597  
0.4780219405045518 0.5726240710562551 0.5260287187290124  
0.4450852382440957 0.4887033626153793 0.5574252540270953  
0.3414185398238323 0.7090226679990732 0.3796757374445873  
0.3753288773543015 0.7593432647424652 0.5415022582929042  
0.4301329632852712 0.4677242192137064 0.4858556253017532  
0.4627418182052188 0.5510246409141857 0.4548200483546772  
0.2585740379262659 0.4575924238549596 0.6563246481628260  
0.5688223251874996 0.5352811855820687 0.5179793866152314  
0.5351909671205154 0.4502385869524862 0.5497137874226411  
0.5195686162180139 0.4295798128177137 0.4783046095133061  
0.5528571297558322 0.5129445241233762 0.4476492031243596  
0.7328956947147951 0.5365569845614764 0.3394608733298670  
0.7250175037330376 0.5999224556041756 0.5486142718307024  
0.7773314802081894 0.5877027494145221 0.4981882733710246  
0.5719447447510503 0.2856836291575347 0.4156414848668787  
0.6233013445211378 0.2472730691062564 0.4519093639653304  
0.6586184637012272 0.2873392627492473 0.6158666750247782  
0.6229091386945266 0.3423574723267580 0.6490513206353802  
0.6620111864343279 0.5248182901282389 0.3234242176685462  
0.5629721469430450 0.5174306654872214 0.6219561603726563  
0.5218255965096339 0.5305595400295575 0.6045221432064697



0.3010887907338090 0.4616729350248501 0.6420230305259934  
0.2697146421285919 0.4151885353541664 0.4874690138945016  
0.3710406302810974 0.6761301457075605 0.3881160946903828  
0.4027556033697088 0.7236282264644783 0.5422479660451238  
0.4607659621081373 0.5789770467656229 0.4871307707289506  
0.4192909710989352 0.4728302385692922 0.5269195874684587  
0.3594998122128401 0.4663607663648309 0.5845527025433845  
0.3440516592251865 0.4430660485272194 0.5082808048997595  
0.4166017824192164 0.6290664219185067 0.4376255794370981  
0.4320740398412391 0.6524557083553501 0.5138622817370013  
0.2853950471518665 0.4370374959605183 0.5651600092946210  
0.3877037144674430 0.7008548124836954 0.4646830718524985  
0.3150860484881625 0.4551004702006189 0.5977130029523662  
0.2993377501335640 0.4315463302224607 0.5199676388783450  
0.3915784635293232 0.6688134931145568 0.4296457340657784  
0.4074277805426067 0.6927429723512397 0.5072623964844140  
0.4365379800889920 0.6215380849488172 0.4792017114086453  
0.3733921179216472 0.4598426175330969 0.5404976106907972  
0.5796103068551840 0.5293298000316595 0.4762803761722288  
0.5369926526407945 0.4227762583864963 0.5168252910364944  
0.6250773819302023 0.5417869641099087 0.4616313778585338  
0.5616938438816597 0.3802594120534438 0.5235197159221621  
0.6362781902262841 0.5346211497328914 0.4168368526961351  
0.6569456471785134 0.5581356190052620 0.4917798001776407  
0.5653785813244335 0.3509614700532461 0.4873750771492489  
0.5826526302985232 0.3710082015140371 0.5641929169590948  
0.6800968512750966 0.5437382007579052 0.4008645834448497  
0.7012060384665214 0.5682228750541033 0.4770383608697665  
0.5905911538400216 0.3107932493653611 0.4910687233975881  
0.6077782035740087 0.3307573451412940 0.5694813542091344  
0.6910766577933990 0.5353803267766511 0.3560693200955913  
0.7124355701275754 0.5611477378098383 0.4312655816670071  
0.7332532836115198 0.5846794894326768 0.5070376426628114  
0.5949528709862164 0.2822044092103577 0.4541327431150763  
0.6112124632508371 0.3006467150773866 0.5327325474890496  
0.6288845172125545 0.3207462776974829 0.6102259413151061  
0.5740765433525149 0.5547335548821936 0.5767132316504502  
0.3831154781621683 0.4817669243278486 0.6075195256056184  
0.3560511951872576 0.4411717623831920 0.4740061874179676  
0.4191216223538042 0.6026382173466482 0.4127604869813014  
0.4460762033247761 0.6434931060736209 0.5462062545196794  
0.2539921706198673 0.4219710942522008 0.5759806022581394  
0.3746399325253651 0.7340232918863858 0.4570369831350330  
0.6108273281985636 0.5196845509302722 0.3955978970555545  
0.6486678367360246 0.5596329058194477 0.5271455590867788  
0.5500666741917728 0.3612314345551549 0.4560570945212533

0.5807104656511638 0.3961539263204783 0.5904350811130415  
0.7435167243310287 0.5750866557302640 0.4183086488086759  
0.6244971145705052 0.2671290368274379 0.5382824829527024  
0.3296090514744375 0.7196360656559722 0.4081001133133593  
0.2164888941591704 0.4275585353460077 0.5193874260246930  
0.4034428409082372 0.6325775926819163 0.3554026790570480  
0.3133007494516872 0.4008615171907585 0.4437537097917088  
0.5480200414001507 0.3073569361022003 0.4198262673016729  
0.7537194122176177 0.5348185103759139 0.3644408712158450  
0.6456111088817408 0.2508930973332897 0.4753501769115526  
0.5975131651567263 0.3625232384753025 0.6462942489194721  
0.6697371476467867 0.2785330655202242 0.5865499447797613  
0.7840546460813500 0.5677612613478589 0.4733194831148090  
0.6932248134175508 0.6062057769647503 0.5511725408738167  
0.3586601490284999 0.4704886745511097 0.6671525562960079  
0.2389451472584762 0.4581773689387504 0.6303616913211140  
0.3536014780395254 0.7549872002964255 0.5176452670171623  
0.4477335882969577 0.6993364932373928 0.5795992303851795  
0.6317915787787350 0.5298124144045602 0.3344050270531761

## References:

- (1) G. Kresse, J. Hafner, *Phys. Rev. B: Condens. Matter Mater. Phys.* 1994, **49**, 14251.
- (2) G. Kresse, D. Joubert, *Phys. Rev. B* 1999, **59**, 1758.
- (3) J. P. Perdew, K. Burke, M. Ernzerhof, *Phys. Rev. Lett.* 1996, **77**, 3865.
- (4) S. Grimme, J. Antony, S. Ehrlich, H. Krieg, *J. Chem. Phys.* 2010, **132**, 154104.
- (5) G. Henkelman, A. Arnaldsson, H. Jónsson, *Comput. Mater. Sci.* 2006, **36**, 354–360.
